# Supplementary material for: Genomic structural equation modelling provides insights into the shared multivariate genetic architecture of cardio-kidney-metabolic syndrome components
Source: Research Square preprint supplement (doi:10.21203/rs.3.rs-7187218/v1), 2025-07-25
Supplement: Supplementary file 1 [file 57534269ae83815f7bdd8732.xlsx]

## Sheet: Supplementatry Table 1
Supplementary Table 1. Cardiovascular-Kidney-Metabolic Syndrome phenotypes included in final specifications of the Genomic structural equation model (GSEM)
Phenotypes included in Genomic SEM model specificationa
CKM syndrome phenotypes	Abbreviation	GWAS source	Samplesize	NSNPs	h2 (SE)	λGC	Mean χ2	Intercept (SE)	Ratio (SE)	Reference
Heart failure	HF	GCST009541	977,323 European ancestry individuals	1176159	0.0609 (0.0049)	1.1263	1.1577	1.0062 (0.0067)	0.0391 (0.0425)	[1]
Coronary heart disease	CHD	ebi-a-GCST003116	183,313 European ancestry individuals	1176302	0.1367 (0.0094)	1.0478	1.1218	0.8853 (0.0082)	-0.9415 (0.0672)	[2]
Stroke	STROKE	ebi-a-GCST005838	446,696 European ancestry individuals	1168403	0.0604 (0.0055)	1.1551	1.1789	1.0443 (0.0067)	0.2475 (0.0374)	[3]
Type 2 diabetes	T2D	ebi-a-GCST005413	70,127 European ancestry individuals	1169713	0.2153 (0.0208)	1.1111	1.1343	1.0022 (0.0081)	0.0161 (0.0605)	[4]
Obesity	Obesity	ukb-b-15541	463,010 European ancestry individuals	999749	0.0112 (0.0013)	1.0966	1.1206	1.0111 (0.0097)	0.0917 (0.0804)	UK Biobank
Chronic kidney disease	CKD	GCST90018822	482,858 European ancestry individuals	1177975	0.0954 (0.0152)	1.0674	1.069	1.0021 (0.0069)	0.0308 (0.1002)	[5]
Notes a. Linkage Disequilibrium Score Regression methodology [6,7]: Number of variants (NSNP) remaining after merging with HapMap3 reference panel; LD Score regression estimates for GWASs included in Genomic SEM final models computed using LDSC python software package (incorporated into Genomic SEM package) with “eur_w_ld_chr/” files of LD Scores calculated; in LD Score regressions, only HapMap3 …
Abbreviations: CKM Cardiovascular-Kidney-Metabolic, HF Heart failure, CHD Coronary heart disease, T2D Type 2 diabetes, CKD Chronic kidney disease.
References
1.Shah, S, et al. Genome-wide association and Mendelian randomisation analysis provide insights into the pathogenesis of heart failure. Nat. Commun. 2020-01-09; 11 (1): 163.
2.Nikpay. M, et al. A comprehensive 1,000 Genomes-based genome-wide association meta-analysis of coronary artery disease. Nat. Genet. 2015; 47 (10): 1121-1130.
3. Malik, R, et al. Multiancestry genome-wide association study of 520,000 subjects identifies 32 loci associated with stroke and stroke subtypes. Nat. Genet. 2018; 50 (4): 524-537.
4. Bonàs-Guarch. S, et al. Re-analysis of public genetic data reveals a rare X-chromosomal variant associated with type 2 diabetes. Nat. Commun. 2018; 9 (1): 321.
5. Sakaue. S, et al. A cross-population atlas of genetic associations for 220 human phenotypes. Nat. Genet. 2021; 53 (10): 1415-1424.
6.Bulik-Sullivan, B. et al. LD Score regression distinguishes confounding from polygenicity in genome-wide association studies. Nat. Genet. 47, 291–295 (2015).
7. Bulik-Sullivan, B. et al. An atlas of genetic correlations across human diseases and traits.. Nat. Genet. 47, 1236–1241 (2015).

## Sheet: Supplementatry Table 2
Supplementary Table 2. Linkage disequilibrium score regression (LDSC) estimates of heritability and genetic correlations of CKM phenotypes
LD Score heritability (diagonal) and genetic correlations (off-diagonal) with standard error (in parentheses)
Phenotype	HF	CHD	STROKE	T2D	Obesity	CKD
HF	0.0609 (0.0049)	0.6496 (0.0519)	0.538 (0.0607)	0.3078 (0.0608)	0.7231 (0.07)	0.5892 (0.0763)
CHD	0.6496 (0.0519)	0.1367 (0.0094)	0.5186 (0.0482)	0.3783 (0.0537)	0.4639 (0.0581)	0.3711 (0.0649)
STROKE	0.538 (0.0607)	0.5186 (0.0482)	0.0604 (0.0055)	0.4042 (0.0658)	0.3136 (0.0743)	0.4631 (0.0778)
T2D	0.3078 (0.0608)	0.3783 (0.0537)	0.4042 (0.0658)	0.2153 (0.0208)	0.2828 (0.0714)	0.412 (0.0833)
Obesity	0.7231 (0.07)	0.4639 (0.0581)	0.3136 (0.0743)	0.2828 (0.0714)	0.0112 (0.0013)	0.6702 (0.0962)
CKD	0.5892 (0.0763)	0.3711 (0.0649)	0.4631 (0.0778)	0.412 (0.0833)	0.6702 (0.0962)	0.0954 (0.0152)
Notes: heritabilty and genetic correlations estimates (standard error of estimates in parentheses); LD score regression (LDSR/LDSC) genetic correlation estimates using LDSC function and “eur_w_ld_chr/” LD Scores files calculated by Bulik-Sullivan et al. [1–2], including only HapMap3 SNPs with MAF > 0.01; with standard errors estimated using a block jackknife over SNPs (in GenomicSEM R Package, ve…
Abbreviations: HF Heart failure, CHD Coronary heart disease, T2D Type 2 diabetes, CKD Chronic kidney disease.
References
1. Bulik-Sullivan, B. et al. LD Score regression distinguishes confounding from polygenicity in genome-wide association studies. Nat. Genet. 47, 291–295 (2015).
2. Bulik-Sullivan, B. et al., An atlas of genetic correlations across human diseases and traits. Nat. Genet. 47, 1236–1241.

## Sheet: Supplementatry Table 3
Supplementary Table 3. Confirmatory factor analysis (CFA) for common factor model
Common-factor model
Model fit statistics
		χ2	df	P χ2	AIC	CFI	SRMR
		28.66	9	0.0007	52.66	0.97	0.08
Parameter estimates
Parameter	LHS	Operator	RHS	Unstand Estimate	Unstand SE	STD Estimate	STD SE	P-value
1	F	=~	HF	0.17486	0.0085565	0.875284	0.0428307	8.01975e-93
2	F	=~	CHD	0.250391	0.0156147	0.715237	0.044603	7.20684e-58
3	F	=~	STROKE	0.10129	0.00690417	0.654319	0.0446	9.91239e-49
4	F	=~	T2D	0.221703	0.0218934	0.473706	0.0467789	4.2159e-24
5	F	=~	Obesity	0.401739	0.0345211	0.709215	0.0609422	2.65698e-31
6	F	=~	CKD	0.223375	0.0210591	0.685028	0.0645823	2.76353e-26
7	HF	~~	HF	0.00933407	0.00344639	0.233878	0.0863539	0.00676155
8	CHD	~~	CHD	0.0598611	0.00907437	0.488437	0.0740424	4.20367e-11
9	STROKE	~~	STROKE	0.013704	0.00209911	0.571867	0.0875956	6.6436e-11
10	T2D	~~	T2D	0.169889	0.0203252	0.775603	0.0927916	6.34935e-17
11	Obesity	~~	Obesity	0.159479	0.0427297	0.497015	0.133167	0.000189762
12	CKD	~~	CKD	0.056433	0.0177585	0.531	0.167	0.00148394
Notes: Confirmatory factor analysis (CFA) of genetic covariance matrix using weighted least squares estimation implemented in Genomic SEM [1]; it is noted that χ2 goodness-of-fit test p-value may be significant seemingly violating the null hypothesis (goodness-of-fit testing that model implied covariance matrix does not significantly differ from observed covariance matrix); however, accordng to G…
Abbreviations: χ2 — Index of fit of Genomic SEM model (Goodness-of-fit χ2 two-sided test). Pχ2 —nominal P value of two-sided goodness-of-fit χ2 test. df —Degrees of freedon of two-sided χ2 goodness-of-fit test. AIC —Akaike information criterion. CFI — Comparative fit index - look for > 0.9. SRMR— Squared root mean residual - look for < 0.8. =~ — Genomic SEM operator. LHS/RHS — Left and right hand…
References
1. Grotzinger, A., et al. Genomic structural equation modelling provides insights into the multivariate genetic architecture of complex traits. Nat.Hum.Beh. 3, 513–525 (2019).

## Sheet: Supplementatry Table 4
Supplementary Table 4. Multi-tiered genome-wide analysis by GSEM
Stratified GWAS evaluation of GSEM
rsID	CHR	BP	non_effect_allele	effect_allele	MAF	p	beta	se	nearestGene	func
rs1980607	1	15975237	G	A	0.26839	1e-200	-0.097547529673	0.00289355	DDI2	intronic
rs12718444	1	43409179	T	G	0.164016	1e-200	-1.82907985608	0.0139265	SLC2A1	intronic
rs12470060	2	2198307	T	C	0.139165	1e-200	0.238854285315	0.00580146	MYT1L	intronic
rs60925909	2	10894859	C	T	0.202783	1e-200	0.161965441169	0.00511789	ATP6V1C2	intronic
rs11687600	2	22886365	G	A	0.162028	1e-200	-0.168179636937	0.00548294	AC096570.1	intergenic
rs262528	2	63903367	T	C	0.279324	1e-200	0.166028881902	0.00484461	WDPCP	intergenic
rs7596231	2	66040362	T	C	0.186879	1e-200	-0.185431017739	0.00468315	AC074391.1	ncRNA_intronic
rs55746113	2	86032424	G	A	0.148111	1e-200	0.225259383343	0.00555894	AC105053.3	intergenic
rs72995626	2	103162580	C	T	0.125249	1e-200	-0.21698930766	0.00645335	SLC9A4	intergenic
rs1402449	2	116146175	G	A	0.168986	1e-200	0.15341685175	0.00443655	DPP10	intronic
rs6759742	2	154041418	A	G	0.175944	1e-200	-1.18960513759	0.00751436	AC011901.2	ncRNA_intronic
rs74687290	2	154119028	G	A	0.170974	1e-200	2.62029954772	0.0210596	AC079150.2	intergenic
rs10497482	2	178805428	C	T	0.136183	1e-200	0.166591818774	0.00525713	PDE11A	intronic
rs17592042	2	179127512	T	C	0.159046	1e-200	0.180101328449	0.005694	OSBPL6	intronic
rs1112651	2	216497739	A	T	0.151093	1e-200	0.325974976586	0.00556668	AC012668.2:LINC00607	ncRNA_intronic
rs1179686	2	217750818	C	T	0.171968	1e-200	1.22527336002	0.00866444	AC007563.5	ncRNA_intronic
rs2290130	2	232263127	A	G	0.2833	1e-200	-0.259710585306	0.00518824	B3GNT7	exonic
rs17013706	3	23787191	G	T	0.208748	1e-200	-0.21501909999	0.0053382	AC020626.1	intergenic
rs61565453	3	45946576	A	C	0.172962	1e-200	-1.47911637486	0.0126284	LZTFL1	intronic
rs11708502	3	61835333	G	A	0.183897	1e-200	-1.35209085805	0.00735641	PTPRG	intronic
rs35652087	3	71928235	A	T	0.116302	1e-200	0.257017675472	0.00636614	RN7SL271P	intergenic
rs4894971	3	103718693	C	T	0.185885	1e-200	-0.228971391679	0.00516675	AC016970.1	intergenic
rs13096609	3	153140796	G	A	0.215706	1e-200	0.160533443689	0.00485365	RP11-23D24.2	ncRNA_intronic
rs73176200	3	171530777	T	A	0.254473	1e-200	0.150776545765	0.00338517	PLD1	intergenic
rs73188921	3	178986121	A	G	0.17992	1e-200	-0.229035559682	0.00540968	KCNMB3	intergenic
rs1203863	4	2502637	C	T	0.185885	1e-200	1.21878204282	0.00770937	RNF4	intronic
rs6419096	4	36980807	C	T	0.161034	1e-200	0.210681819806	0.00615934	RP11-103J17.2	intergenic
rs28758322	4	61148146	A	G	0.0685885	1e-200	-0.169955371781	0.00551266	AC095061.1	intergenic
rs59951580	4	99534556	A	C	0.181909	1e-200	0.368444831389	0.00540439	TSPAN5	intronic
rs4088802	4	121465431	C	A	0.17992	1e-200	-0.505296879761	0.00612075	RP11-501E14.1	intergenic
rs2052751	4	139412927	C	T	0.195825	1e-200	-0.165330605477	0.00467105	RP11-310A13.2	intergenic
rs10026813	4	140816174	G	A	0.189861	1e-200	0.366444572759	0.00587776	MAML3	intronic
rs10032932	4	144508554	A	G	0.151093	1e-200	0.32424195068	0.00651984	GUSBP5:FREM3	ncRNA_intronic
rs35304118	4	184680209	A	G	0.239563	1e-200	-0.270400626312	0.00534422	TRAPPC11	intergenic
rs12522524	5	45257086	T	C	0.17495	1e-200	2.91161593591	0.0372486	HCN1	intergenic
rs13168931	5	45332824	T	A	0.183897	1e-200	-0.228148812139	0.0053101	HCN1	intronic
rs62360151	5	83711091	A	C	0.202783	1e-200	0.922942364455	0.00737618	CTD-2269F5.1	ncRNA_intronic
rs10059579	5	128048540	A	G	0.176938	1e-200	-0.236418305597	0.00643603	SLC27A6:CTC-573M9.1	ncRNA_intronic
rs35939651	5	158539786	G	C	0.178926	1e-200	3.00710387843	0.0196179	RP11-175K6.1	ncRNA_intronic
rs2008503	6	1256449	T	C	0.175944	1e-200	0.925664109719	0.00567879	FOXQ1	intergenic
rs9465358	6	19359630	C	A	0.187873	1e-200	-0.172719681268	0.00500822	RPL5P20	intergenic
rs9455015	6	70954877	A	G	0.201789	1e-200	-0.234703029514	0.00477634	COL9A1	intronic
rs28718866	6	92291203	A	G	0.188867	1e-200	-0.315754967859	0.00592413	CASC6	intergenic
rs9488095	6	113510245	T	C	0.187873	1e-200	1.01035385323	0.00703151	SOCS5P5	intergenic
rs1435535	7	12214836	G	A	0.184891	1e-200	-0.964052863138	0.00627575	TMEM106B	intergenic
rs73066492	7	21615967	T	C	0.173956	1e-200	-0.573480383718	0.00648451	DNAH11	intronic
rs34853751	7	25809045	A	G	0.133201	1e-200	-0.266800878079	0.00546935	AC003090.1	intergenic
rs28452927	7	156800885	G	A	0.0884692	1e-200	-0.253660233177	0.00748697	MNX1	intronic
rs62493376	7	157041666	G	A	0.126243	1e-200	-0.190370137541	0.00578074	UBE3C	intronic
rs3937574	7	157805146	C	A	0.182903	1e-200	0.902227003231	0.00717578	PTPRN2	intronic
rs59003218	8	8554921	A	G	0.251491	1e-200	-0.210166684195	0.00483889	CLDN23	intergenic
rs28404841	8	9719827	T	C	0.185885	1e-200	-0.221707357551	0.00525771	snoU13	intergenic
rs16929627	9	12820965	T	C	0.0805169	1e-200	0.394121559661	0.00557532	LURAP1L	intronic
rs4313236	9	22610531	G	A	0.187873	1e-200	-2.37477342768	0.0173307	RP11-399D6.2	intergenic
rs13294341	9	29479296	A	G	0.171968	1e-200	-1.19766634189	0.00803836	RP11-48L13.1	intergenic
rs80168305	9	36973065	C	A	0.153082	1e-200	0.268558684429	0.00583499	PAX5	intronic
rs10746715	9	86205804	C	T	0.183897	1e-200	-1.23076233215	0.00650962	RNU4-15P	intergenic
rs12554240	9	89885028	C	T	0.185885	1e-200	2.95043435916	0.0215198	SNORA26	intergenic
rs10820939	9	94851058	C	G	0.182903	1e-200	-1.99989800739	0.0143187	SPTLC1	intronic
rs2184383	10	16376270	A	C	0.16998	1e-200	0.15914023264	0.00463114	RP11-461K13.1	intergenic
rs34926990	10	80098916	T	C	0.0864811	1e-200	-0.195960738947	0.00527049	LINC00856	ncRNA_intronic
rs1419268	10	85725305	A	G	0.171968	1e-200	-0.947046334651	0.00791605	RNU1-65P	intergenic
rs66962771	10	87315425	A	T	0.143141	1e-200	0.195489032633	0.00553126	RN7SKP84	intergenic
rs35176275	11	32533221	A	G	0.125249	1e-200	-0.322637798592	0.00783262	WT1-AS	intergenic
rs12286317	11	77389020	C	T	0.232604	1e-200	0.147517755525	0.00487393	RSF1	intronic
rs7944752	11	109405386	T	C	0.129225	1e-200	-0.287634394175	0.00738765	RP11-708B6.2	ncRNA_intronic
rs2715791	11	113683860	C	T	0.0914513	1e-200	-0.196490161167	0.00616084	USP28	intronic
rs11215786	11	115969151	T	C	0.158052	1e-200	0.150367404924	0.00490112	AP000797.2	intergenic
rs9630202	11	131971337	G	A	0.264414	1e-200	0.170405875251	0.004464	NTM	intronic
rs4763299	12	9904449	T	G	0.183897	1e-200	4.26479275135	0.0462038	CD69	downstream
rs4963688	12	27432385	C	T	0.175944	1e-200	-3.65232613548	0.0516986	STK38L	intronic
rs59259158	12	43054312	A	G	0.181909	1e-200	0.606538427427	0.00565562	RP11-25I15.2	ncRNA_intronic
rs10858961	12	90525851	T	G	0.195825	1e-200	1.72081190775	0.00826877	RP11-567C2.1	intergenic
rs6538742	12	97203085	A	T	0.250497	1e-200	-0.207779287549	0.00481742	C12orf55	intronic
rs61932197	12	99362581	G	C	0.177932	1e-200	1.33663630482	0.0081599	ANKS1B:RP11-473C19.1	ncRNA_intronic
rs7988358	13	56485005	G	A	0.161034	1e-200	-3.65912783152	0.0504828	HNF4GP1	intergenic
rs55740369	13	75032764	A	T	0.196819	1e-200	-0.153944875643	0.0047808	LINC00381	intergenic
rs9520725	13	108676500	G	T	0.251491	1e-200	-0.113588466898	0.00372586	FAM155A	intergenic
rs7143486	14	23310152	T	C	0.198807	1e-200	-0.599111293708	0.00613975	MMP14	intronic
rs8013268	14	33668748	C	T	0.229622	1e-200	0.168134835784	0.00522279	NPAS3	intronic
rs10146562	14	35622480	C	T	0.166004	1e-200	0.700430758917	0.00643715	KIAA0391:KIAA0391	intronic
rs78092957	15	40143645	T	A	0.196819	1e-200	0.494066028597	0.00590685	GPR176	intronic
rs7161981	15	55726437	C	T	0.0874751	1e-200	-0.229470153367	0.00679373	DYX1C1-CCPG1:DYX1C1	ncRNA_intronic
rs2679616	15	70205637	A	G	0.249503	1e-200	0.147849168635	0.00437114	LINC00593	intergenic
rs12903187	15	71702266	G	T	0.151093	1e-200	-0.163376638457	0.00377357	THSD4	intronic
rs9936496	16	29758793	T	C	0.173956	1e-200	0.609517555455	0.0073579	AC009133.17	ncRNA_exonic
rs12597686	16	52682324	A	G	0.190855	1e-200	-0.160065771963	0.00513611	CASC16	ncRNA_intronic
rs4785112	16	60459666	A	C	0.171968	1e-200	-0.488563400079	0.00632227	RP11-354I13.2	ncRNA_intronic
rs11655873	17	26335481	C	T	0.0864811	1e-200	-0.474384359021	0.00768472	SCARNA20	intergenic
rs2111018	17	55661511	C	G	0.172962	1e-200	-2.15847696479	0.0144189	MSI2	intronic
rs1265931	18	11900863	A	G	0.164016	1e-200	2.0155538889	0.0142453	MPPE1	intronic
rs2169247	18	77451403	A	G	0.17495	1e-200	0.660553220563	0.00518266	CTDP1	intronic
rs1821301	19	15879895	A	G	0.162028	1e-200	-1.3481951572	0.00806918	CYP4F24P:LLNLR-249E10.1	ncRNA_intronic
rs11700511	21	38723262	T	A	0.100398	1e-200	0.262294498152	0.00732669	AP001437.1	intergenic
rs12864396	13	77021434	C	T	0.167992	4.26426e-199	0.122463944945	0.004068	RN7SL571P	intergenic
rs7704256	5	11160431	G	C	0.466203	6.71135e-198	0.107409329603	0.0035788	CTNND2	intronic
rs111739932	1	797325	C	T	0.0745527	9.93913e-197	-0.498225211989	0.0166503	LINC01128	intergenic
rs12873881	13	63187305	G	T	0.0894632	5.25872e-195	0.214727715623	0.00720804	LINC00448	intergenic
rs10240715	7	71228015	T	C	0.158052	2.78126e-194	-0.163441357534	0.00549676	CALN1	intergenic
rs7574795	2	76200225	C	G	0.171968	3.50281e-190	0.162702853559	0.00553124	SUCLA2P2	intergenic
rs62139520	2	31109970	A	C	0.178926	8.14326e-189	0.14859744399	0.00507016	GALNT14	intergenic
rs77177483	19	33611605	T	A	0.105368	2.91837e-186	-0.253943023367	0.00872443	GPATCH1	intronic
rs73090874	12	26374615	C	G	0.235586	2.12855e-185	-0.136609500688	0.00470437	SSPN:RP11-283G6.4	ncRNA_intronic
rs10414194	19	28293894	T	C	0.202783	1.33844e-184	-0.10395187253	0.00358757	CTC-459F4.3:LLNLF-65H9.1	ncRNA_intronic
rs298442	1	26301699	T	C	0.198807	6.46138e-184	0.144729423029	0.00500427	PAFAH2	intronic
rs10943409	6	77772237	A	C	0.187873	5.2865e-182	5.30586339572	0.184432	RP11-354K4.2	intergenic
rs2208783	6	124536546	A	G	0.26839	4.79082e-181	0.0856513363738	0.00298519	NKAIN2	intronic
rs58738956	9	22998209	T	C	0.0964215	5.88007e-180	0.229913052945	0.00803761	AL391117.1	intergenic
rs12495044	3	73725020	T	C	0.224652	8.23729e-179	0.142528316958	0.00499883	RP11-451J24.1	intergenic
rs56214700	8	49255947	A	G	0.131213	1.09988e-178	-0.0882527923788	0.00309635	RNU6-295P	intergenic
rs17414106	1	79438696	G	A	0.137177	6.0056e-178	0.17340432296	0.00609663	ELTD1	intronic
rs12718975	7	55661857	T	C	0.199801	4.81028e-175	0.169215188086	0.00599907	RP11-310H4.3	ncRNA_intronic
rs3761986	6	6680510	C	T	0.38171	5.61689e-174	0.0966192290965	0.00343599	RP1-80N2.3	downstream
rs1338144	1	81321698	A	T	0.274354	3.24235e-172	0.0994317047303	0.00355426	RP5-887A10.1	intergenic
rs260491	19	58664447	C	T	0.159046	6.39597e-171	-0.139527133325	0.00500659	ZNF329	intronic
rs9711993	2	239684289	A	G	0.148111	3.50984e-170	0.138518745764	0.00498133	AC144525.1	intergenic
rs1076933	22	45198494	G	A	0.413519	6.69234e-170	0.104340330995	0.00375535	PRR5-ARHGAP8:ARHGAP8	intronic
rs12402363	1	11921243	G	A	0.293241	1.46748e-169	0.130979953163	0.00471895	NPPB	intergenic
rs2813410	10	1517191	C	G	0.156064	2.33194e-169	0.128301689921	0.00462523	ADARB2	intronic
rs61995388	15	24666056	G	A	0.194831	5.76806e-167	0.126123948066	0.0045796	PWRN3	intergenic
rs3920862	11	34795679	T	A	0.0854871	1.21818e-166	0.245660549264	0.0089288	RP4-743O11.1	intergenic
rs243736	21	29151802	A	G	0.185885	6.27648e-166	0.149246006957	0.00543628	LINC00113	intergenic
rs2441901	8	105207142	T	A	0.289264	1.44252e-165	-0.127697867602	0.00465653	RIMS2	intronic
rs61875577	11	24504919	A	C	0.463221	1.55572e-165	-0.0940639800084	0.00343041	LUZP2	intergenic
rs7919439	10	9764384	A	G	0.310139	3.08496e-165	-0.0869648330139	0.0031744	HSP90AB7P	ncRNA_exonic
rs4559914	16	25755591	T	G	0.089463	3.34379e-165	-0.182822429739	0.00667411	HS3ST4	intronic
rs11874303	18	10414037	A	G	0.176938	4.11479e-165	-3.01092204249	0.109947	RP11-243E13.1	ncRNA_exonic
rs7165592	15	60619296	T	G	0.250497	6.55931e-162	0.126988938472	0.00468335	ANXA2	intergenic
rs12163625	3	34918504	T	C	0.270378	9.11827e-162	0.133369778443	0.00492088	FECHP1	intergenic
rs75578613	12	19957366	A	T	0.0745527	5.72969e-161	-0.421670956574	0.0155972	RP11-405A12.2	ncRNA_intronic
rs10041378	5	4094165	T	G	0.236581	1.45258e-159	-0.130552092506	0.00485047	CTD-2008N3.1	intergenic
rs9836053	3	150885877	T	G	0.16004	2.11279e-159	0.171634434572	0.00638012	MED12L	intronic
rs62478652	7	109822740	A	G	0.143141	2.5353e-158	0.161391512675	0.00602004	RPL3P8	intergenic
rs57244622	8	125909980	T	C	0.356859	1.09785e-157	-0.110444952101	0.00412811	LINC00964	ncRNA_intronic
rs1998992	6	20260978	G	A	0.277336	4.31912e-156	-0.0924613003867	0.00347377	RP11-239H6.2	ncRNA_intronic
rs7274520	20	17751840	C	T	0.265408	5.96647e-156	-0.0993866456651	0.00373566	BANF2	intergenic
rs62305339	4	84491716	A	C	0.242545	1.13788e-155	0.138806387155	0.00522209	AGPAT9	intronic
rs4733806	8	128909539	T	C	0.307157	1.45538e-155	0.126364458556	0.00475567	PVT1	ncRNA_intronic
rs9951604	18	71736079	A	C	0.130219	2.32268e-155	0.138770126645	0.005226	FBXO15	intergenic
rs1719247	15	45620985	T	C	0.272366	8.83671e-155	-0.153029576228	0.00577394	CTD-2651B20.4	intergenic
rs4551054	5	105882293	A	G	0.284294	1.17811e-154	0.122610073064	0.00462808	SNORA31	upstream
rs13166252	5	142798197	A	G	0.2167	2.06118e-153	0.132077845139	0.00500588	NR3C1	intronic
rs10506515	12	67298018	C	T	0.292247	1.05343e-152	0.111228162911	0.00422555	RP11-123O10.4	ncRNA_intronic
rs12220782	10	131485205	G	A	0.300199	2.34756e-152	0.119674530238	0.00455169	MGMT	intronic
rs62179646	2	189123590	G	A	0.27336	1.57035e-151	0.107773740251	0.00411036	LINC01090	ncRNA_intronic
rs2418487	15	100585610	G	T	0.213718	4.85628e-151	0.13141449387	0.00502023	ADAMTS17	intronic
rs6777272	3	27488310	G	T	0.22664	1.5914e-150	0.125866250735	0.00481661	SLC4A7	intronic
rs66783663	5	22642534	T	C	0.145129	4.59591e-149	0.134736858756	0.00518162	CDH12	intronic
rs41310873	1	152659805	A	G	0.303181	9.80254e-149	-0.119336408429	0.0045945	LCE2B	UTR3
rs3133969	8	110752859	A	C	0.156064	6.59461e-147	-0.146647624924	0.00568149	RP11-25D10.2	intergenic
rs409095	5	54435532	C	T	0.240557	1.36739e-146	0.113807832341	0.00441403	CDC20B	intronic
rs423190	7	34999315	G	A	0.285288	3.80255e-144	-0.117201040413	0.00458455	DPY19L1	intronic
rs9363732	6	67959832	T	C	0.140159	4.80391e-144	-0.163366942712	0.0063927	SNORD65	intergenic
rs2227480	12	68648342	A	G	0.196819	6.88369e-144	-0.12650339536	0.00495292	IL22	upstream
rs548125	7	54605182	G	A	0.337972	4.43789e-143	-0.119862705706	0.00470637	VSTM2A	intergenic
rs2275723	10	135139635	A	G	0.106362	1.91173e-142	-0.162835405553	0.0064081	ZNF511:CALY	UTR3
rs6947411	7	105619330	T	G	0.0745527	4.44226e-142	-0.301905181004	0.0118965	CDHR3	intronic
rs78043512	17	75157354	T	G	0.199801	3.50578e-141	0.13994957832	0.00553241	SEC14L1	intronic
rs7631623	3	96381472	G	T	0.220676	4.19367e-140	0.149762977356	0.0059434	AC117444.1	intergenic
rs12129062	1	188117353	T	C	0.082505	8.25797e-138	0.101435615406	0.00405937	RN7SKP156	intergenic
rs11114074	12	109260526	A	G	0.253479	1.62685e-136	0.0814749526825	0.00327622	DAO	intronic
rs60525841	6	120827282	G	A	0.151093	1.27265e-135	-0.111704083724	0.00450676	RNU6-214P	intergenic
rs149307564	7	105822856	C	G	0.0884692	9.16863e-135	0.211292939915	0.00855222	RNU6-392P	intergenic
rs4872354	8	25639033	T	A	0.223658	1.78472e-134	0.112916436043	0.00457535	RP11-219J21.2	intergenic
rs4614260	1	191044104	G	A	0.194831	2.20757e-134	-0.0933951603184	0.00378567	HNRNPA1P46	intergenic
rs1357331	1	77348936	A	G	0.486083	4.05653e-133	0.101097124744	0.00411757	ST6GALNAC5	intronic
rs13079950	3	21321236	A	C	0.15507	6.17904e-133	0.14712163264	0.00599628	AC104183.1	intergenic
rs62441727	6	149800870	T	C	0.238569	5.51412e-132	0.11595690917	0.00474334	ZC3H12D	intronic
rs35038192	10	95750068	T	C	0.234592	8.89422e-132	-0.0984632602794	0.00403096	PLCE1	intergenic
rs2246578	8	22744564	C	T	0.430417	1.03933e-131	0.0741720379813	0.0030373	PEBP4:RP11-87E22.2	ncRNA_exonic
rs7916778	10	70417863	T	C	0.129225	1.1064e-130	0.150301367322	0.00617927	TET1	intronic
rs603874	11	87829030	T	C	0.151093	2.03434e-130	0.126583711634	0.00520953	RP11-164N3.2	ncRNA_intronic
rs17702888	5	143958077	C	T	0.245527	4.03772e-130	0.102576430999	0.00422642	RN7SKP246	intergenic
rs2648901	8	129106308	C	T	0.186879	9.35358e-130	-0.135214009336	0.00557912	PVT1	ncRNA_intronic
rs78680879	2	201649113	A	G	0.102386	1.64287e-129	-0.163709674377	0.00676137	AOX2P:AC007163.6	ncRNA_intronic
rs13133087	4	70266015	C	A	0.22167	1.96911e-129	-0.126637459169	0.00523186	RP11-790I12.1	ncRNA_intronic
rs11140466	9	86859797	G	C	0.139165	3.3674e-129	0.139316002018	0.00576093	SLC28A3	intergenic
rs524766	3	196686918	G	A	0.230616	4.45215e-129	-0.116147185799	0.00480516	PIGZ	intronic
rs1877261	12	51657636	C	T	0.16004	1.50763e-128	-0.126667403779	0.00525135	DAZAP2:SMAGP	intronic
rs147480110	3	42020393	C	T	0.152087	3.40799e-128	0.123027283766	0.00510759	RP11-626A1.1	downstream
rs12993353	2	79941636	G	A	0.213718	4.6612e-128	0.122369758233	0.00508303	CTNNA2	intronic
rs11524413	11	29070144	C	G	0.234592	9.47122e-128	0.114336963309	0.00475517	RP11-115J23.1	ncRNA_intronic
rs7261265	20	54125615	T	C	0.137177	2.30503e-127	-0.0764784299394	0.00318557	RP5-1010E17.1	intergenic
rs9369422	6	43777297	G	C	0.285288	1.48877e-125	-0.0920482893024	0.00386208	VEGFA	intergenic
rs1171558	1	156452093	A	G	0.219682	2.31776e-125	-0.118869358682	0.0049913	MEF2D	intronic
rs388857	6	83383217	C	T	0.27336	2.49577e-125	0.103307604265	0.00433843	UBE3D	intergenic
rs4689959	4	4897904	A	G	0.17495	1.01491e-124	0.133447789129	0.00561807	LDHAP1	intergenic
rs35290237	4	19298630	T	A	0.238569	2.90898e-124	-0.119033770642	0.00502061	RP11-3J1.1	ncRNA_intronic
rs1448301	2	224046610	G	A	0.286282	3.73344e-124	-0.096847415144	0.00408664	KCNE4	intergenic
rs6120810	20	33626249	G	A	0.232604	8.51846e-124	0.109411406326	0.00462358	TRPC4AP	intronic
rs7788242	7	91079310	A	G	0.460239	1.4242e-123	-0.0887567881266	0.00375419	RP11-115N4.1:RP11-142A5.1	ncRNA_intronic
rs13196685	6	170768700	C	T	0.185885	3.28349e-123	4.96961873708	0.210517	RP1-140C12.2	intergenic
rs12827073	12	114459372	G	A	0.289264	7.0728e-123	-0.0965466026748	0.00409542	RBM19	intergenic
rs74045622	11	1049989	C	T	0.122266	7.69993e-123	-0.159316584921	0.00675909	RP13-870H17.3	ncRNA_intronic
rs9796837	16	86991924	T	C	0.213718	5.08807e-122	-0.114089950501	0.00485683	RP11-107C10.1	intergenic
rs4942758	13	48787990	T	C	0.16998	3.61611e-120	-0.140593495468	0.0060318	ITM2B	intergenic
rs62472681	7	143049847	G	A	0.140159	5.17757e-120	0.155282122783	0.00666637	FAM131B	downstream
rs4795759	17	31591397	C	T	0.202783	8.87989e-119	-0.103657826211	0.00447355	ASIC2	intronic
rs13105883	4	15860271	A	G	0.441352	7.75804e-118	0.0716627497247	0.00310528	CD38	intergenic
rs11131164	3	9319740	A	G	0.159046	5.99418e-117	-0.102376259405	0.00445326	SRGAP3	intergenic
rs946792	10	7031033	C	T	0.473161	8.48424e-117	0.0982465964516	0.00427643	RP11-799O21.2	intergenic
rs7517457	1	231965989	G	T	0.097416	8.49195e-117	-0.154121410365	0.00670853	DISC1	intronic
rs10925799	1	239207623	T	C	0.254473	9.58436e-117	0.0571488866583	0.00248812	RP11-307O1.1	intergenic
rs12523335	5	10664578	G	A	0.295229	1.28776e-116	0.104175052102	0.00453806	RP11-215G15.4	downstream
rs71582126	5	155407546	T	C	0.297217	1.04583e-115	-0.1037416981	0.00453722	SGCD	intronic
rs72649298	13	106683877	T	C	0.157058	1.52018e-114	-0.113154734523	0.00497439	AL603632.1	intergenic
rs4567716	16	1849410	T	G	0.229622	2.85997e-114	-0.108543223673	0.00477749	HAGH	intronic
rs7562504	2	130462267	C	G	0.462227	6.16362e-114	0.0995523513307	0.00438828	AC079776.1	intergenic
rs13060312	3	190675956	A	C	0.100398	1.63019e-113	0.160598347911	0.00709258	GMNC	intergenic
rs4354505	1	188620733	A	C	0.0914513	2.73051e-113	0.172409676438	0.00762187	RP11-669M2.2	intergenic
rs4789253	17	74220591	G	A	0.0755467	4.57398e-113	-0.0854281482284	0.00378041	RNF157	intronic
rs7867403	9	26457404	G	A	0.21173	4.60078e-113	-0.121203361422	0.00536361	AL442639.1	intergenic
rs34112261	3	25203618	T	C	0.133201	1.78614e-111	-0.108655108593	0.00484307	AC133680.1	ncRNA_intronic
rs1451656	11	4431543	G	A	0.186879	1.28901e-110	-0.132463405438	0.00592755	OR51R1P	intergenic
rs349505	3	140222610	A	C	0.266402	4.09748e-110	0.0970407347618	0.00435251	CLSTN2	intronic
rs9864425	3	156286090	C	T	0.264414	7.53119e-110	0.0975750319479	0.00438183	SSR3	intergenic
rs75660000	19	47119227	C	T	0.202783	1.41005e-109	-0.106592857266	0.00479285	PTGIR	intergenic
rs35114997	2	4110598	T	C	0.312127	3.4082e-108	-0.0707661729273	0.00320258	RN7SL531P	intergenic
rs9625525	22	29053009	A	C	0.0894632	6.75383e-108	-0.194841915108	0.00883009	TTC28	intronic
rs28529244	5	141754120	A	G	0.267396	1.40687e-107	0.100040768828	0.00454061	AC005592.2	ncRNA_intronic
rs2784096	9	139789057	T	A	0.217694	2.03488e-107	0.103627998457	0.00470699	TRAF2	intronic
rs57441863	11	76524940	A	T	0.135189	2.04784e-107	0.124507457228	0.00565546	RP11-21L23.2	intergenic
rs7848962	9	79679676	G	C	0.237575	7.80951e-107	-0.118772836968	0.0054099	RP11-490H9.1	intergenic
rs73796482	4	7193849	G	A	0.16004	1.59474e-106	-0.102388488717	0.00467053	SORCS2	upstream
rs12203323	6	169425778	A	C	0.257455	1.79237e-106	-0.0973962057059	0.00444389	RP3-495K2.2	intergenic
rs34433849	15	69560081	G	A	0.403579	2.8677e-106	0.0710457592267	0.00324477	GLCE	intronic
rs16959227	17	64411414	C	T	0.082505	2.90176e-106	0.0773933884689	0.00353476	PRKCA:RP11-4F22.2	ncRNA_exonic
rs12206113	6	162047381	T	C	0.291252	2.09428e-105	0.0903316919464	0.00414276	PARK2	intronic
rs17150451	7	24929889	C	T	0.0815109	2.37591e-105	0.161725357109	0.00741896	OSBPL3	intronic
rs13191094	6	2395245	T	C	0.154076	3.49417e-105	-0.0969001849818	0.00444879	GMDS-AS1	ncRNA_exonic
rs1673217	7	138290859	A	T	0.292247	3.92295e-105	-0.0831307853792	0.00381755	SVOPL	intronic
rs6695502	1	171773176	G	T	0.23161	7.56839e-105	0.0486289392683	0.00223624	METTL13	downstream
rs10786370	10	99499822	A	G	0.191849	9.15918e-105	0.092115086096	0.0042377	ZFYVE27	intronic
rs13016400	2	148563890	C	T	0.45825	1.2534e-104	0.0821100596786	0.00377993	AC009480.4	intergenic
rs6715256	2	28723942	T	C	0.152087	1.6152e-104	-0.108730479921	0.00500808	PLB1	intronic
rs316584	5	2317367	A	G	0.230616	2.01291e-104	-0.0958935228006	0.00441888	Y_RNA	intergenic
rs28420209	16	77826422	C	T	0.133201	2.96564e-104	-0.11047204923	0.00509486	VAT1L	intronic
rs7775876	6	102225817	A	G	0.134195	1.3361e-103	0.118864718433	0.00549952	GRIK2	intronic
rs7832832	8	140158651	T	C	0.299205	1.17449e-102	-0.0894177595534	0.00415644	CTD-2534J5.1	intergenic
rs2289337	10	122649482	G	A	0.220676	1.32505e-102	-0.0977290768268	0.00454396	WDR11	exonic
rs4931163	12	29347848	C	T	0.161034	1.49639e-102	0.119292753801	0.00554803	FAR2	intronic
rs2619483	12	25702667	T	A	0.177932	5.3766e-102	-0.102795103098	0.00479401	IFLTD1	intronic
rs9290315	3	167212764	G	A	0.464215	2.20654e-101	0.0936274827539	0.00437991	WDR49	intronic
rs57440245	6	616855	C	G	0.130219	3.07833e-101	0.106192752623	0.00497133	EXOC2	intronic
rs73181034	13	37939288	A	T	0.127237	9.15037e-101	0.130472455588	0.00612256	LINC01048	intergenic
rs11650950	17	71112670	C	T	0.215706	1.49265e-100	-0.0920737038697	0.00432531	SLC39A11	intergenic
rs4247165	1	92832179	G	C	0.192843	1.91456e-100	1.30890832731	0.0615219	RPAP2	intronic
rs12374470	5	93481046	G	A	0.139165	1.10919e-99	-0.120747796794	0.00569754	KIAA0825	intergenic
rs11185864	10	91499869	G	A	0.232604	1.88367e-99	0.100386798461	0.00474238	KIF20B	intronic
rs6721361	2	102159888	G	A	0.4334	2.43771e-99	-0.0750529121633	0.00354762	AC092570.4	intergenic
rs58244993	5	77429949	T	C	0.217694	2.78618e-99	-0.0942258349093	0.00445522	AP3B1	intronic
rs4677905	3	123524834	A	T	0.249503	3.71377e-99	0.087677645637	0.00414826	MYLK	intronic
rs6965971	7	51552707	C	T	0.202783	3.95496e-99	0.0964050685751	0.00456182	CTD-2021A8.3	intergenic
rs17114046	1	56966350	G	A	0.11829	7.25451e-99	-0.141405532622	0.0067003	PPAP2B	intronic
rs13362062	5	160786065	C	T	0.11332	8.2728e-99	0.148318065701	0.00702991	GABRB2	intronic
rs35711527	5	2460984	C	T	0.225646	1.44074e-98	-0.0605988989648	0.00287582	RP11-129I19.2	intergenic
rs16957367	18	51377268	T	C	0.298211	2.00676e-98	-0.095118385645	0.00451736	AC090666.1	intergenic
rs6506540	18	7936938	G	A	0.287276	2.70554e-98	0.0949462931336	0.00451222	PTPRM	intronic
rs4523580	1	217764772	G	C	0.228628	3.85919e-98	-0.096476303015	0.00458861	GPATCH2	intronic
rs13335015	16	19905164	T	G	0.17495	8.96977e-98	-2.32490511634	0.110788	AC134300.1	intergenic
rs7525906	1	110319838	T	C	0.2167	1.03539e-97	-0.0880018005654	0.0041949	GSTM5	intergenic
rs963296	4	181126952	A	T	0.137177	1.61717e-97	-0.146371944335	0.00698437	RP11-774G5.1	intergenic
rs7179352	15	59522622	G	A	0.234592	1.62756e-97	-0.0764151780091	0.00364632	MYO1E	intronic
rs72678430	14	47491311	G	A	0.133201	1.84957e-97	-0.137310630825	0.00655399	MDGA2:MDGA2	intronic
rs4785482	16	50974725	T	C	0.287276	1.08611e-96	-0.0934033338313	0.0044763	RP11-883G14.1	intergenic
rs7797393	7	75446303	C	A	0.294235	1.37804e-96	0.0605931450742	0.00290547	CCL24	intronic
rs672865	11	82965098	T	C	0.2833	1.43766e-96	-0.0971870758851	0.00466063	ANKRD42	intronic
rs2908547	7	56176101	T	C	0.22167	3.43459e-96	-0.107479803446	0.00516455	CHCHD2	intergenic
rs879379	10	43481455	C	G	0.15507	5.80058e-96	0.121194190885	0.00583058	RP11-124O11.2	intergenic
rs12800727	11	95758622	T	C	0.314115	6.47958e-96	0.0818938704844	0.00394087	MAML2	intronic
rs57713566	13	70367853	G	C	0.271372	1.23559e-95	0.122220668816	0.00589026	KLHL1	intronic
rs4483218	9	76758064	C	T	0.331014	1.25523e-95	-0.0826411906485	0.00398293	RP11-171A24.2	intergenic
rs4465562	15	53009377	T	C	0.198807	1.61141e-95	-0.110033753089	0.00530619	FAM214A	intergenic
rs11963043	6	107213712	A	G	0.166998	3.27209e-95	0.13194542594	0.00637333	RP1-60O19.1	ncRNA_intronic
rs8047611	16	87816592	A	G	0.164016	4.48584e-95	-0.137207952163	0.0066324	RP4-536B24.3	ncRNA_intronic
rs7584020	2	176311539	T	C	0.159046	6.8748e-95	-0.0953895408002	0.00461556	AC096649.3	ncRNA_intronic
rs1926526	13	109358612	T	C	0.280318	7.31025e-95	0.0958262370177	0.00463736	MYO16	intronic
rs35730331	4	43166348	C	G	0.304175	8.83996e-95	0.0893559556236	0.00432616	RP11-395F4.1	ncRNA_intronic
rs4702294	5	5844749	G	A	0.426441	9.77054e-95	0.0895727542451	0.00433767	CTC-471C19.1	intergenic
rs72920629	18	45023442	G	C	0.166004	1.05788e-94	-0.104713656334	0.00507183	CTD-2130O13.1	ncRNA_intronic
rs73879615	3	166909785	C	T	0.265408	1.68222e-94	-0.105294139099	0.00510549	ZBBX	intergenic
rs56402676	11	69835887	T	C	0.159046	2.9251e-94	-0.105193719637	0.00510726	RP11-626H12.1	ncRNA_intronic
rs55963049	1	146579535	A	C	0.241551	7.51612e-94	0.0683870548797	0.00332765	NBPF13P	ncRNA_intronic
rs13233515	7	98697795	C	T	0.10338	1.80066e-93	0.141788574221	0.00691358	SMURF1	intronic
rs28366602	15	31755805	C	T	0.292247	2.87855e-93	0.0849267829247	0.00414563	RP11-126F18.2	intergenic
rs1876832	2	221638280	A	C	0.228628	5.11585e-93	-0.11308439384	0.00552768	AC093843.1	intergenic
rs17198722	16	3569130	T	C	0.147117	1.00257e-92	-0.110095733886	0.00539024	CLUAP1	intronic
rs1108010	11	15216692	T	C	0.311133	1.67745e-92	-0.099621255992	0.00488343	INSC	intronic
rs2330948	7	55080356	G	A	0.136183	2.22544e-92	0.0676297762691	0.00331746	EGFR	intergenic
rs35501428	11	45076640	A	G	0.232604	2.50806e-92	0.0941943066422	0.00462186	PRDM11	intergenic
rs55696830	10	33477953	C	G	0.230616	1.19747e-91	-0.0972520136964	0.00478991	NRP1	intronic
rs1957792	14	86319868	C	T	0.413519	1.52516e-91	-0.0715199927449	0.00352461	CTD-2341M24.1	intergenic
rs6897294	5	71380914	C	T	0.272366	2.00013e-91	-0.0674377666073	0.00332562	MAP1B	intergenic
rs758657	17	64823329	G	A	0.315109	9.99635e-91	-0.0776735940776	0.00384542	CACNG5	intergenic
rs10764917	10	131621711	C	T	0.308151	2.65682e-90	0.106191058722	0.00526986	EBF3	intergenic
rs62118168	2	4497693	T	G	0.167992	6.2485e-90	0.112080377215	0.00557385	NPM1P48	intergenic
rs9572349	13	70644467	A	G	0.151093	9.79029e-90	0.119681718304	0.00595847	KLHL1	intronic
rs12550260	8	141274461	C	T	0.12326	1.14873e-89	0.096536009484	0.00480804	TRAPPC9	intronic
rs72724738	4	140054499	G	A	0.0904573	4.89375e-89	-0.160665355434	0.0080309	ELF2	intronic
rs11654150	17	8257499	T	C	0.311133	1.07321e-88	-0.073805167611	0.00369641	AC135178.1	intergenic
rs721301	2	181387265	A	G	0.300199	1.31935e-88	-0.088538216388	0.00443659	RP11-512G4.1	intergenic
rs80336545	8	115228399	G	A	0.0924453	2.9634e-88	0.154808488089	0.00777311	RP11-267L5.1	intergenic
rs282941	16	77538625	T	C	0.253479	4.4524e-88	0.0818846755506	0.00411574	RP11-449J10.1	intergenic
rs7977045	12	114256006	A	G	0.383698	5.50079e-88	-0.0688092935509	0.00346038	RBM19	intronic
rs12919717	16	10973185	T	C	0.230616	9.20857e-88	0.0932397655506	0.00469508	RP11-876N24.2:CIITA	ncRNA_intronic
rs380124	16	62663719	G	A	0.136183	4.55502e-87	-0.108621651185	0.00549189	AC009110.1	intergenic
rs1241347	18	33182828	G	A	0.427435	1.52723e-86	-0.0499252777366	0.00253203	GALNT1	intronic
rs11213783	11	97919121	C	T	0.158052	2.27284e-86	0.0954878828734	0.00484776	RP11-684B20.1	intergenic
rs4817629	21	35645539	C	T	0.33002	3.78166e-86	-0.0769396551776	0.00391122	AP000320.7:AP000318.2	ncRNA_intronic
rs4722433	7	25187944	A	G	0.323062	1.01692e-85	0.0670728511622	0.00341837	C7orf31	intronic
rs62433161	7	8206510	A	G	0.158052	1.49165e-85	0.092142847432	0.00470073	ICA1	intronic
rs72993048	19	6553629	C	A	0.388668	4.09599e-85	-0.0791672489006	0.0040494	CTD-2396E7.7	ncRNA_intronic
rs354958	5	173926691	A	G	0.232604	1.2404e-84	-0.0939129335022	0.00481759	RP11-267A15.1	ncRNA_intronic
rs10493766	1	85945660	G	A	0.256461	1.62352e-84	-0.0946834865197	0.00486055	DDAH1	intronic
rs1350665	4	75204442	G	A	0.302187	1.70009e-84	-0.0712820264226	0.00365969	AC097470.1	intergenic
rs17736718	4	67704942	T	C	0.270378	2.29181e-84	0.0820685871239	0.00421679	RNU6-699P	intergenic
rs11599504	10	53596241	A	C	0.485089	4.70005e-84	-0.069101256098	0.00355725	PRKG1	intronic
rs10146311	14	43862631	G	C	0.175944	4.72743e-84	0.0897681103563	0.00462122	HNRNPUP1	intergenic
rs9607885	22	42578596	C	T	0.206759	5.47181e-84	-0.0492591579353	0.00253682	TCF20	intronic
rs62215996	21	28318748	G	C	0.265408	9.74845e-84	-0.0739684642774	0.00381517	ADAMTS5	intronic
rs2301792	4	6596647	G	A	0.461233	1.71438e-83	0.0703196016051	0.00363241	MAN2B2	intronic
rs10766332	11	1386835	G	A	0.232604	1.76327e-83	0.0905768838704	0.00467917	BRSK2	intergenic
rs4676818	3	120392504	C	G	0.190855	1.7949e-83	-0.0978971771848	0.00505757	HGD	intronic
rs4455626	6	81251731	T	C	0.467197	2.00518e-83	0.0825871930041	0.00426789	RP11-486E2.1	intergenic
rs10921305	1	193001474	G	A	0.280318	1.04739e-82	0.0678930019399	0.00352408	UCHL5	intronic
rs11119284	1	209641089	C	G	0.182903	1.76083e-82	-1.46444877462	0.0761206	MIR205HG	intergenic
rs829412	1	21953436	G	A	0.16998	5.72799e-82	0.091144528284	0.00475273	RAP1GAP	intronic
rs56337921	10	66906970	G	T	0.125249	8.7561e-82	0.0855880776704	0.00446813	MYL6P3	intergenic
rs873249	8	81120591	C	A	0.362823	1.09979e-81	-0.0757011330557	0.00395444	TPD52	intergenic
rs72901012	6	50935358	A	G	0.122266	2.95247e-81	-0.0626523654245	0.00328163	FTH1P5	intergenic
rs111595973	16	9617180	T	C	0.10338	3.73695e-81	-0.146009396971	0.00765268	RP11-418I22.2	intergenic
rs10022945	4	154342296	T	C	0.170974	4.63669e-81	2.3386568973	0.122647	MND1	intergenic
rs10916814	1	20892931	T	C	0.269384	6.36621e-81	-0.05945084976	0.00312051	FAM43B	intergenic
rs734002	7	148505788	C	T	0.394632	1.83954e-80	-0.0601173316942	0.00316473	EZH2	intronic
rs112314129	6	138332019	T	C	0.0854871	1.98785e-80	-0.0708312058625	0.00372954	RPSAP42	intergenic
rs72883559	2	181866610	C	A	0.287276	2.42238e-80	-0.0814543455464	0.00429123	UBE2E3	intronic
rs73946422	2	104991726	A	C	0.199801	4.23276e-80	-0.0853084036541	0.00450123	AHCYP3	intergenic
rs1491043	12	77970694	C	T	0.23161	1.64184e-79	0.0880687619372	0.00466447	RP1-34H18.1	intergenic
rs6894735	5	57886875	A	G	0.302187	1.95242e-78	-0.0778742499508	0.00415339	RAB3C	intronic
rs12217961	10	127834338	C	T	0.33996	3.60359e-78	-0.07055045151	0.00376934	ADAM12	intronic
rs8053038	16	60228128	G	A	0.299205	4.12304e-78	0.0810671035407	0.00433288	RP11-430C1.1	intergenic
rs2294740	1	170928671	C	T	0.131213	9.85899e-78	0.091136202947	0.0048832	MROH9	exonic
rs1919343	8	35158920	G	T	0.191849	1.01948e-77	-0.0954940597063	0.00511719	UNC5D	intronic
rs11925970	3	78751148	T	G	0.264414	1.5795e-77	0.046052936413	0.00247091	ROBO1	intronic
rs5015958	15	24490114	C	G	0.189861	5.56472e-77	-0.0973434241003	0.00524182	RP11-580I1.2	ncRNA_intronic
rs7547299	1	5025243	T	C	0.195825	6.75089e-77	-0.110078220891	0.00593089	RP11-542C10.1	intergenic
rs7024798	9	80534063	C	T	0.242545	8.8589e-77	-0.0459510103834	0.00247774	GNAQ	intronic
rs7563608	2	177927010	C	T	0.090457	1.11518e-76	0.164389246722	0.00887	AC079305.11	ncRNA_intronic
rs249493	5	14144399	G	C	0.257455	1.17579e-76	-0.0827289849217	0.00446452	TRIO	intronic
rs282057	1	91821503	G	A	0.358847	2.8781e-76	-0.0838830425733	0.00453861	HFM1	intronic
rs6451624	5	42519262	C	T	0.49503	3.59433e-76	-0.0759924565146	0.00411435	GHR	intronic
rs4704858	5	155345118	A	G	0.148111	3.72993e-76	-0.093364417865	0.00505544	SGCD	intronic
rs8132709	21	19061093	T	G	0.218688	7.00009e-76	0.074735386959	0.0040542	AP000432.2	intergenic
rs1482459	6	64593687	A	T	0.280318	8.93478e-76	-0.0847242923624	0.00459936	EYS	intronic
rs2700786	8	5832225	T	C	0.333996	9.72354e-76	-0.068640932729	0.00372718	RP11-158A14.1	intergenic
rs7129486	11	37317593	T	A	0.488072	1.33946e-75	-0.0676665635535	0.00367774	SNORA31	intergenic
rs9577916	13	114580382	T	C	0.255467	1.72654e-75	0.0942890793894	0.00512854	RP11-199F6.4	upstream
rs1713813	3	153873643	G	T	0.127237	2.99685e-75	0.116586066271	0.00635165	ARHGEF26	intronic
rs4860286	4	69060535	A	C	0.269384	3.12007e-75	-0.0971271515543	0.00529215	FTLP10:RP11-646E20.6:TMPRSS11BNL	ncRNA_intronic
rs6764494	3	74506398	G	C	0.354871	3.41338e-75	-0.0831463272388	0.00453158	CNTN3	intronic
rs72923970	4	123076361	A	G	0.0894632	4.70487e-75	-0.133228967807	0.00726806	KIAA1109	intronic
rs12592318	15	84219700	A	G	0.22167	4.99733e-75	0.0702321117443	0.00383207	SH3GL3	intronic
rs339533	13	60538310	A	G	0.353877	8.55154e-75	-0.0832744762536	0.00455096	DIAPH3	intronic
rs62252961	3	69703507	G	A	0.23161	1.34813e-74	0.0839132602828	0.0045921	RP11-444P10.1	intergenic
rs4756755	11	13158471	T	C	0.336978	1.99089e-74	-0.0723347762824	0.00396309	CTC-497E21.5	intergenic
rs56892207	17	2675474	A	G	0.151093	2.32256e-74	0.0935665346444	0.00512871	RAP1GAP2	intergenic
rs11660736	18	70066194	A	G	0.33499	6.32792e-74	-0.073114759462	0.00401976	CBLN2	intergenic
rs62513212	8	83597846	A	T	0.083499	9.3979e-74	-0.109939435309	0.00605156	RP11-653B10.1	intergenic
rs7979223	12	62148127	C	T	0.314115	2.87137e-73	0.0848108449367	0.0046842	FAM19A2	intronic
rs7167787	15	87079441	C	G	0.150099	3.26896e-73	-0.0622947069497	0.00344196	AGBL1	intronic
rs11588345	1	113583087	C	G	0.333002	3.66782e-73	-0.0717375702111	0.0039651	RP11-389O22.1:RP11-31F15.2	ncRNA_intronic
rs4706827	6	80787532	T	C	0.358847	5.48443e-73	0.0786879599623	0.0043546	AK4P5	ncRNA_exonic
rs9359149	6	76638950	A	T	0.194831	9.17117e-73	0.0990047973429	0.00548756	IMPG1	intronic
rs2834526	21	35920551	C	A	0.185885	1.01685e-72	0.105087344126	0.00582654	RCAN1	intronic
rs2023993	7	68162576	A	G	0.313121	1.11624e-72	0.0667453034559	0.00370173	RNA5SP231	intergenic
rs7720655	5	168466569	G	T	0.129225	1.33905e-72	0.100745863416	0.00559055	SLIT3	intronic
rs6658006	1	242080555	G	A	0.243539	3.90215e-72	0.088896544322	0.00494929	RP11-323D18.5	downstream
rs12565565	1	163482240	G	A	0.161034	5.70074e-72	-0.0567825581279	0.00316506	RNA5SP63	intergenic
rs9395496	6	49470452	C	T	0.333002	1.1919e-71	0.0673695664566	0.00376379	GLYATL3	intronic
rs3091237	17	32597803	T	C	0.151093	1.35822e-71	-0.106314904907	0.00594199	CCL7	intronic
rs78472863	10	62619164	C	T	0.127237	1.73834e-71	0.11247504129	0.00629112	RHOBTB1	intergenic
rs17774118	4	72796639	C	T	0.239563	2.14928e-71	0.0838054650211	0.00469064	NPFFR2	intergenic
rs9369922	6	49868405	A	G	0.467197	4.17609e-71	-0.0559269671998	0.00313678	CRISP1	intergenic
rs1191353	14	28577036	A	G	0.215706	1.7687e-70	0.0659339062825	0.00371489	AL445384.1	intergenic
rs17005205	4	82817672	T	A	0.411531	2.74856e-70	0.0764671251646	0.00431438	RASGEF1B:RP11-689K5.3	ncRNA_intronic
rs2035356	4	34528256	C	T	0.159046	2.98884e-70	0.0885386362815	0.0049968	RP11-725M22.1	intergenic
rs13182395	5	76607335	A	C	0.267396	3.49576e-70	-0.0736055073514	0.0041561	PDE8B	intronic
rs7766458	6	54140128	C	A	0.126243	5.18904e-70	-0.0706954221468	0.0039968	MLIP	intergenic
rs1983920	20	22699484	C	T	0.28827	5.66779e-70	0.0845763645939	0.00478291	KRT18P3	intergenic
rs4241838	4	187980880	G	T	0.266402	7.44628e-70	0.0656585806766	0.00371632	RP11-696F12.1	upstream
rs1592818	5	168741524	C	A	0.246521	7.94665e-70	0.0868822589131	0.00491862	SLIT3	intergenic
rs12590180	14	93096616	G	A	0.121272	1.13239e-69	0.131811716441	0.00747064	RIN3	intronic
rs62377929	5	150740237	A	G	0.208748	2.1694e-69	0.0451682770857	0.00256533	CTB-23I7.1	intergenic
rs17014035	1	206841857	C	A	0.168986	2.64664e-69	-0.0663706026134	0.00377193	DYRK3	intergenic
rs13146871	4	114755337	C	G	0.213718	3.61758e-69	0.0717550849777	0.00408205	RP11-397D21.1	intergenic
rs12313532	12	41867868	G	A	0.11332	5.05137e-69	0.114364351025	0.00651304	PDZRN4	intronic
rs1876282	11	132761853	T	C	0.262425	6.77918e-69	0.07765402206	0.0044266	OPCML	intronic
rs78692129	9	80831743	G	A	0.219682	9.70382e-69	-0.081821881477	0.00466962	RP11-336N8.4	intergenic
rs9615846	22	48658962	A	G	0.464215	1.62647e-68	-0.0715548973193	0.00409054	MIR3201	intergenic
rs6480723	10	75966366	G	A	0.127237	3.33537e-68	0.112641484361	0.00645443	ADK	intronic
rs55827099	8	75848662	A	G	0.196819	3.89762e-68	-0.0915939497975	0.00525107	RP11-3N13.2	intergenic
rs12256432	10	131319445	T	C	0.16998	4.33307e-68	-0.102836567346	0.00589766	MGMT	intronic
rs9305523	21	34545377	A	C	0.172962	4.43637e-68	-0.0933346480912	0.00535314	C21orf54	intergenic
rs9640925	7	139085288	A	G	0.274354	4.52864e-68	0.0789547940133	0.0045287	C7orf55-LUC7L2:LUC7L2	intronic
rs34781781	4	183929075	T	C	0.156064	5.58749e-68	0.116313819686	0.00667614	RP11-335L23.2	intergenic
rs34674864	7	112946649	C	T	0.133201	5.64694e-68	0.0678512488768	0.00389464	RP11-703P11.1	intergenic
rs7820626	8	104383315	T	C	0.236581	1.76345e-67	-0.0906315947769	0.00522179	CTHRC1	upstream
rs1456103	3	157170524	T	C	0.295229	2.39659e-67	-0.0648867756858	0.00374229	VEPH1	intronic
rs4412351	8	125102535	C	G	0.131213	3.287e-67	-0.0902350159596	0.00520968	FER1L6:FER1L6-AS2	ncRNA_intronic
rs1846555	3	25075632	G	C	0.341948	4.66061e-67	0.0678064624804	0.00391933	AC133680.1	ncRNA_intronic
rs61896133	11	47115719	C	G	0.222664	1.06654e-66	0.0652093190194	0.00377964	C11orf49	intronic
rs4700907	5	179601674	A	G	0.346918	1.69945e-66	0.0722282413358	0.00419302	RASGEF1C	intronic
rs16903859	5	38108611	A	G	0.254473	2.35546e-66	-0.0635598696794	0.00369385	CTD-2116N24.1	ncRNA_intronic
rs688433	2	72690622	G	A	0.0984095	3.01141e-66	0.165037743935	0.00959929	EXOC6B	UTR3
rs2021751	2	230013153	T	C	0.250497	4.54875e-66	-0.0791745609902	0.00461154	PID1	intronic
rs12420783	11	93997886	T	C	0.168986	4.8091e-66	-0.107427487098	0.00625832	RP11-680H20.2	ncRNA_intronic
rs989310	1	4771695	C	G	0.451292	5.9623e-66	0.0679587251487	0.0039619	AJAP1	intronic
rs2647455	1	220207810	T	C	0.206759	6.47597e-66	0.0805075988081	0.0046948	EPRS	intronic
rs9999104	4	5449825	A	G	0.109344	7.38186e-66	0.099975285458	0.00583264	STK32B	intronic
rs17401978	12	101212470	T	C	0.293241	8.1236e-66	-0.0782196956905	0.00456489	ANO4	intronic
rs10224039	7	24367761	T	C	0.305169	9.03705e-66	-0.0691242110058	0.00403553	NPY	intergenic
rs17125108	8	17538341	G	A	0.315109	1.13885e-65	-0.0614332711633	0.00358935	MTUS1	intronic
rs1846801	13	85624464	C	T	0.12326	1.39403e-65	-0.106900717956	0.00625017	LINC00375	intergenic
rs7254774	19	52716840	A	T	0.122266	2.26355e-65	-0.094652116154	0.00554319	PPP2R1A	intronic
rs733813	1	18907484	G	A	0.481113	2.58924e-65	0.0618893037244	0.00362614	RP1-8B22.2	intergenic
rs6961208	7	125107738	C	T	0.16004	3.30827e-65	0.0567689843269	0.00332893	RP11-807H17.1	intergenic
rs7965111	12	54061357	C	T	0.300199	3.58148e-65	0.079039426621	0.00463613	ATP5G2	intronic
rs76762467	10	62250984	G	A	0.100398	3.65593e-65	0.104178561792	0.00611112	ANK3	intronic
rs6827175	4	177314205	C	G	0.2167	4.36451e-65	-0.0929359942868	0.00545495	SPCS3	intergenic
rs12546618	8	87204271	G	A	0.264414	5.65892e-65	-0.0701876896117	0.0041234	CTD-3118D11.3	ncRNA_intronic
rs1019930	5	166880551	C	T	0.130219	6.67006e-65	-0.0520161954173	0.00305758	TENM2	intronic
rs1949022	12	127733148	G	A	0.315109	1.29141e-64	0.0606231972375	0.00357165	RP11-955H22.1	intergenic
rs61904829	11	103352262	A	G	0.122266	1.99922e-64	0.0742262585706	0.00437971	DYNC2H1	intergenic
rs2675139	2	236672715	G	A	0.248509	3.03987e-64	-0.0471654764338	0.00278705	AGAP1	intronic
rs9544056	13	76443847	T	G	0.149105	3.41637e-64	-0.0611743479197	0.00361631	C13orf45	intergenic
rs7554814	1	203643164	A	G	0.156064	9.35979e-64	-0.0591681623721	0.00351006	ATP2B4	intronic
rs62350955	5	18434823	C	T	0.158052	1.05826e-63	0.102148995779	0.00606244	RN7SL58P	intergenic
rs6933364	6	153911907	C	T	0.166998	1.14717e-63	0.106540930176	0.00632489	RP11-331O9.1	intergenic
rs17748992	1	231892773	T	C	0.0874751	1.27435e-63	-0.107817242116	0.00640302	TSNAX-DISC1:DISC1	intronic
rs34238687	3	173371992	T	C	0.162028	3.08291e-63	-0.0556627372582	0.003316	NLGN1	intronic
rs13023417	2	172221512	T	G	0.290258	3.92627e-63	-0.0605966154209	0.00361301	METTL8	intronic
rs7602661	2	45506205	C	T	0.356859	3.97388e-63	0.0768024908481	0.00457947	LINC01121	ncRNA_intronic
rs72669957	1	55156195	G	C	0.153082	4.20313e-63	-0.104240264701	0.00621672	MROH7-TTC4:MROH7	intronic
rs11029826	11	27098784	C	G	0.185885	4.78114e-63	-0.074780290654	0.00446181	BBOX1:RP11-1L12.3	ncRNA_intronic
rs55902642	13	108981411	G	A	0.0894632	4.92528e-63	-0.121669892602	0.00726028	TNFSF13B	intergenic
rs10784289	12	62606931	A	G	0.139165	5.6622e-63	0.0549962213253	0.00328336	FAM19A2	intronic
rs112250173	12	94952025	G	T	0.0805169	5.73371e-63	0.111217171344	0.00664013	MIR5700	intergenic
rs11018814	11	87939560	G	A	0.156064	6.70071e-63	0.0610762563684	0.00364853	MIR3166	intergenic
rs7553890	1	214005905	C	T	0.151093	7.99923e-63	0.101413064728	0.00606195	PROX1-AS1	ncRNA_exonic
rs4486258	9	6806946	A	G	0.104374	1.57854e-62	-0.112248864181	0.00672596	KDM4C	intronic
rs1762101	6	159643992	A	G	0.227634	2.05612e-62	0.0771274785993	0.00462586	FNDC1	intronic
rs7085819	10	15013308	T	C	0.256461	3.22176e-62	0.0641449458099	0.00385342	MEIG1	intronic
rs680941	1	195166715	A	G	0.359841	7.78014e-62	-0.0760775184098	0.00458481	AL357932.1	intergenic
rs6866022	5	145236496	A	T	0.0864811	1.05364e-61	0.164892128735	0.00994814	GRXCR2	intergenic
rs4327145	18	5124045	C	T	0.242545	1.13271e-61	-0.0586902849559	0.00354179	RP11-190I17.4	intergenic
rs17131332	1	70994595	A	G	0.124254	1.75286e-61	0.0972768400021	0.00587969	RP11-42O15.2	intergenic
rs420029	8	109108609	G	A	0.267396	4.29464e-61	0.0438679113755	0.00266019	RSPO2	intergenic
rs1740694	14	93510531	A	G	0.410537	4.57175e-61	0.0657771236555	0.00398971	ITPK1	intronic
rs7430675	3	18875039	T	C	0.247515	4.5897e-61	-0.052448081433	0.00318128	AC144521.1	ncRNA_intronic
rs55842131	4	58754578	T	C	0.0974155	4.90597e-61	-0.0984568129163	0.00597343	RP11-4O3.2	intergenic
rs9991378	4	18584975	A	G	0.140159	7.31937e-61	0.0476411975208	0.00289467	RP11-608B3.1	intergenic
rs11035202	11	39293416	T	C	0.10835	1.23528e-60	0.120776311664	0.00735252	RNU6-99P	intergenic
rs2744799	1	41185534	C	A	0.217694	1.86641e-60	-0.0583964503781	0.00356044	NFYC	intronic
rs11885193	2	139080891	G	A	0.217694	2.25661e-60	-0.0478585289558	0.00291999	AC097523.3	intergenic
rs409363	5	62577126	C	G	0.342942	2.79415e-60	-0.0603712751583	0.00368636	CTD-2049O17.1	intergenic
rs876571	2	239032652	C	T	0.133201	5.14317e-60	0.0403043509657	0.00246664	ESPNL	intronic
rs4710914	6	19654713	G	T	0.323062	5.29009e-60	0.0576616651145	0.00352928	RP1-167F1.2	ncRNA_intronic
rs11119753	1	211676720	T	C	0.17495	7.4879e-60	-0.0740655458676	0.0045392	RD3:RP11-359E8.3	intergenic
rs76334049	17	78794255	T	G	0.0934394	1.332e-59	0.100651814125	0.00618191	RPTOR	intronic
rs73453030	12	131241784	A	G	0.145129	1.55019e-59	0.0849367176323	0.00521969	STX2	intergenic
rs7589732	2	105809102	C	T	0.27336	2.05443e-59	-0.071520745979	0.00439989	AC104655.3	intergenic
rs9541177	13	68183928	C	A	0.153082	2.0648e-59	0.100635707427	0.00619113	BCRP9	intergenic
rs59052534	11	106790674	G	A	0.0894632	2.25925e-59	0.0825791965544	0.00508202	GUCY1A2	intronic
rs62129922	2	10313375	T	C	0.338966	2.29952e-59	0.0720979575346	0.00443728	C2orf48	intronic
rs7516087	1	17393889	G	A	0.300199	4.19612e-59	0.0696844746313	0.00429851	PADI2	UTR3
rs9656282	7	121078042	T	C	0.249503	4.32874e-59	-0.0701600658445	0.00432836	RP11-3L10.3	intergenic
rs1007062	14	63498060	A	T	0.222664	5.60248e-59	0.0593522164468	0.00366518	KCNH5	intronic
rs6426613	1	20480668	T	G	0.331014	6.00452e-59	-0.0597767670238	0.00369237	RP3-340N1.2	upstream
rs2096032	14	50829380	C	A	0.337972	6.0734e-59	-0.0609753690995	0.00376657	CDKL1	intronic
rs574880	4	99206009	G	C	0.117296	1.07375e-58	-0.0720427766688	0.0044599	RAP1GDS1	intronic
rs8140093	22	36853963	A	G	0.436382	1.45953e-58	-0.0596192545346	0.00369514	RP5-1119A7.14	intergenic
rs7525854	1	5123611	T	C	0.239563	1.90617e-58	0.0809025427086	0.00501938	RP11-542C10.1	intergenic
rs10020248	4	117178762	T	C	0.161034	2.07784e-58	0.098370035759	0.00610513	RP11-659O3.1	ncRNA_intronic
rs426182	1	243775450	T	A	0.141153	4.88372e-58	-0.0545162024598	0.00339458	AKT3	intronic
rs76831956	5	41387804	C	T	0.139165	6.4547e-58	-0.0902860701138	0.00562794	PLCXD3	intronic
rs204863	2	118561727	G	A	0.100398	6.55607e-58	0.0971490755265	0.00605611	AC009312.1	ncRNA_exonic
rs10815034	9	469767	A	C	0.232604	7.82461e-58	-0.0768476030583	0.00479384	RP11-165F24.3	ncRNA_exonic
rs1866534	11	96576270	A	G	0.130219	8.98809e-58	-0.0904677683995	0.00564651	RP11-360K13.1	ncRNA_intronic
rs9528437	13	62590753	T	C	0.266402	9.31502e-58	0.0597528647236	0.00372997	LINC00358	ncRNA_intronic
rs6846897	4	4645385	G	T	0.235586	1.32094e-57	0.0502843016671	0.00314318	STX18-AS1	ncRNA_intronic
rs6737964	2	44226195	G	A	0.33499	2.01901e-57	-0.0570220135961	0.00357024	LRPPRC	intergenic
rs2252256	10	71445355	T	C	0.262425	3.52293e-57	0.0704658468507	0.0044216	RP11-242G20.1	intronic
rs7795109	7	29666244	A	G	0.197813	3.69213e-57	-0.0629035773052	0.00394781	ZNRF2P2	ncRNA_intronic
rs2248728	12	82418382	A	G	0.265408	6.71989e-57	0.0685169997866	0.00431024	RP11-362A1.2	intergenic
rs2451602	1	238168345	C	A	0.446322	6.83981e-57	-0.054045518897	0.00340011	MTND5P18	intergenic
rs12699	1	230973407	T	G	0.289264	7.05098e-57	0.0616369808183	0.00387817	C1orf198	UTR3
rs11194511	10	111008513	T	G	0.260437	8.84288e-57	-0.0672004924305	0.00423201	RNU6-839P	intergenic
rs1983159	7	49975018	A	G	0.214712	2.37886e-56	-0.0637073763197	0.0040278	ZPBP	intergenic
rs28667587	1	248566400	C	T	0.16501	3.31829e-56	-0.0784415614833	0.00496593	OR2T1	intergenic
rs7750326	6	145037578	G	A	0.230616	4.64459e-56	0.0746402674617	0.00473164	UTRN	intronic
rs72915093	18	44490732	C	G	0.083499	5.44899e-56	0.103778353597	0.00658299	PIAS2	intronic
rs1404802	7	145730908	A	C	0.430417	6.63827e-56	-0.0659692724152	0.00418795	RN7SL207P	intergenic
rs770210	9	15887931	C	G	0.137177	1.02554e-55	0.0637325644245	0.00405304	CCDC171	intronic
rs1418483	1	34997944	A	G	0.446322	1.39515e-55	0.000700208333833	4.45847e-05	MIR552	intergenic
rs10959122	9	10492397	C	T	0.316103	1.70984e-55	0.0477002044489	0.00303974	PTPRD	intronic
rs1383795	14	85141162	T	C	0.144135	3.8622e-55	-0.0567235329065	0.00362673	RNU6-976P	intergenic
rs4327261	2	1050007	G	C	0.134195	4.45332e-55	-0.0998058787899	0.00638499	SNTG2	intronic
rs62461217	7	63658251	C	T	0.256461	5.88906e-55	-0.0662666278835	0.00424418	RP11-468B6.1	intergenic
rs10959798	9	11432615	T	C	0.249503	1.0939e-54	0.0678410643293	0.00435605	RP11-23D5.1	intergenic
rs4761246	12	69992448	A	G	0.242545	1.96106e-54	0.0394026689106	0.00253612	CCT2	intronic
rs6022347	20	51847746	C	G	0.289264	3.20504e-54	-0.0230394737151	0.00148593	TSHZ2	intronic
rs4268687	14	78466304	T	C	0.482107	3.40352e-54	0.0660336503175	0.0042599	FRDAP	intergenic
rs10798464	1	176572091	A	C	0.287276	4.01218e-54	-0.060893604189	0.00393099	PAPPA2	intronic
rs35738525	2	97147587	T	C	0.156064	5.37869e-54	-0.0898682820107	0.00580852	NEURL3	intergenic
rs13134662	4	134377197	C	A	0.232604	8.51553e-54	0.0583346613553	0.00377762	AC105252.1	intergenic
rs113535874	1	220008363	T	C	0.127237	1.13221e-53	0.0502727185665	0.00325942	SLC30A10	intergenic
rs1992131	2	121125289	T	C	0.127237	2.39309e-53	-0.0909729790994	0.00591678	INHBB	intergenic
rs11812109	10	7730983	T	C	0.138171	2.69116e-53	0.0612971083625	0.00398867	ITIH2	intergenic
rs10254609	7	124348657	T	C	0.244533	4.95419e-53	-0.0650339502135	0.00424276	GPR37	intergenic
rs1864409	10	43575872	G	A	0.12326	5.97762e-53	-0.0866356255622	0.00565654	RET	intronic
rs6606680	12	110448256	G	A	0.176938	6.07415e-53	0.0813039624538	0.00530879	ANKRD13A	intronic
rs62478331	7	124316522	T	C	0.161034	6.54988e-53	-0.0505108678718	0.00329919	RNU6-102P	intergenic
rs11223367	11	132989139	G	T	0.327038	9.31844e-53	0.0687607808483	0.00449796	OPCML	intronic
rs11701218	21	32864122	G	A	0.157058	1.00642e-52	0.0880913236347	0.00576435	TIAM1	intronic
rs13005673	2	233961160	A	G	0.159046	1.15261e-52	0.0712466618654	0.0046648	INPP5D	intronic
rs4949841	1	75765593	T	C	0.353877	1.90974e-52	0.0710219916708	0.00466014	SLC44A5	intronic
rs7504651	18	65045137	G	A	0.158052	2.59054e-52	0.0630408352168	0.00414187	RP11-563H6.1	intergenic
rs10858379	9	138181507	G	A	0.260437	2.62353e-52	-0.0524147408164	0.00344391	AL390778.1	intergenic
rs7639774	3	107816216	G	T	0.245527	3.12882e-52	-0.0452978712874	0.00297855	CD47	intergenic
rs11259541	10	15240556	C	G	0.205765	3.18407e-52	-0.0717936119437	0.00472113	FAM171A1	intergenic
rs4738828	8	61727587	G	T	0.340954	4.14064e-52	0.0646303052436	0.00425489	CHD7	intronic
rs1080262	4	155797151	G	A	0.23161	9.14333e-52	-0.0700276618527	0.00462606	RBM46	intergenic
rs2174076	1	238837866	A	G	0.45825	1.13913e-51	-0.0369220093261	0.00244142	MIPEPP2	intergenic
rs179322	2	150010847	T	G	0.170974	1.24457e-51	-0.0914280295278	0.00604789	LYPD6B	intronic
rs580187	6	106767576	A	T	0.157058	2.48063e-51	-0.0496712075529	0.00329563	ATG5	intronic
rs35128922	2	46033907	A	G	0.266402	2.58732e-51	0.0633069726078	0.00420112	PRKCE	intronic
rs12888924	14	96287146	A	T	0.272366	3.27684e-51	0.0595553678923	0.00395626	AL133167.1	intergenic
rs61864383	10	119795092	G	A	0.121272	3.45514e-51	-0.120938931136	0.00803584	RAB11FIP2:RP11-354M20.3	ncRNA_intronic
rs6983255	8	134484365	C	T	0.0894632	3.4645e-51	-0.108063206754	0.00718039	ST3GAL1	intronic
rs9546426	13	84090575	G	T	0.367793	3.84846e-51	-0.046701531393	0.00310457	RNU6-67P	intergenic
rs837470	12	125061389	T	C	0.15507	3.93824e-51	-0.0967998418287	0.00643561	NCOR2	intergenic
rs4749316	10	7907572	A	G	0.390656	4.20967e-51	0.0447584286513	0.00297658	TAF3	intronic
rs17126053	14	90033633	G	A	0.263419	4.25009e-51	-0.0697060480657	0.00463587	FOXN3:RP11-33N16.3	ncRNA_intronic
rs1329585	9	32317994	C	A	0.095427	5.31871e-51	-0.0789902958795	0.00525852	SLC25A5P8	intergenic
rs4478781	1	4086827	T	C	0.161034	5.70936e-51	0.0837791675311	0.00557907	RP13-614K11.1	intergenic
rs10210718	2	70966323	T	C	0.358847	7.21665e-51	-0.0710740545768	0.00473791	ADD2	intronic
rs1871145	12	21706282	G	T	0.229622	7.67658e-51	0.0683824871542	0.00455973	GYS2	intronic
rs61956718	13	66623714	T	G	0.202783	7.85626e-51	0.0682228577713	0.00454955	MIR548X2	intergenic
rs1446409	2	193164089	G	A	0.112326	9.77396e-51	-0.152177498798	0.010158	TMEFF2	intergenic
rs2373702	2	40084166	G	A	0.402584	1.07386e-50	0.0558018406631	0.0037264	SLC8A1-AS1	ncRNA_intronic
rs355914	2	165656787	C	G	0.366799	1.12301e-50	0.0584829041466	0.00390621	COBLL1	intronic
rs16915963	10	63039856	A	G	0.217694	1.19257e-50	-0.0126994795108	0.000848455	TMEM26	intergenic
rs248711	5	127017331	C	T	0.345924	1.32436e-50	0.0557064239174	0.00372349	CTC-548H10.2	intergenic
rs2295818	14	55215297	G	C	0.203777	1.33747e-50	0.0423074736889	0.00282801	SAMD4A	intronic
rs55799024	3	42762291	C	A	0.183897	1.77307e-50	1.6828117856	0.112628	CCDC13	intronic
rs215449	4	23433898	C	A	0.238569	2.01205e-50	-0.0404973286477	0.00271195	RFPL4AP3	intergenic
rs6604120	1	109289487	T	C	0.257455	2.04036e-50	-0.0651740017472	0.00436472	STXBP3	intronic
rs28622938	14	81772635	T	G	0.213718	2.8281e-50	-0.0804827596484	0.00539782	STON2	intronic
rs11117777	1	217325016	C	T	0.17495	3.05941e-50	0.0887619614494	0.00595519	ESRRG	intergenic
rs4839078	1	111405037	C	A	0.286282	3.41429e-50	0.0434318833374	0.00291535	OR11I1P	intergenic
rs111447575	7	75393550	G	A	0.305169	4.99771e-50	0.0796415795777	0.00535508	CCL26	intergenic
rs4489050	5	147034690	G	A	0.166004	5.11795e-50	-0.0990564820756	0.00666125	JAKMIP2	intronic
rs62036066	16	4809334	T	C	0.124254	5.42034e-50	-0.109063151762	0.00733606	ZNF500	intronic
rs11193816	10	109721673	A	G	0.207753	5.51106e-50	-0.0663053255424	0.00446032	RP11-215N21.1	ncRNA_intronic
rs6546364	2	68475068	A	C	0.363817	7.067e-50	0.0501590602097	0.00337795	RP11-474G23.1:PPP3R1	intronic
rs72789910	2	24388609	G	T	0.250497	8.20603e-50	0.0419750524257	0.00282871	FAM228B:RP11-507M3.1	intronic
rs2385796	19	36959310	C	T	0.449304	9.59621e-50	-0.0627127585019	0.00422923	ZNF566	intronic
rs13280150	8	59198884	A	G	0.153082	9.68147e-50	-0.0670533749148	0.00452213	RP11-716D16.1	intergenic
rs2806034	14	73422350	G	T	0.313121	1.04247e-49	-0.0682845052951	0.0046067	DCAF4	exonic
rs13084791	3	168720556	G	A	0.191849	1.37562e-49	-0.0618834810205	0.00418012	RP11-152C17.1	upstream
rs933057	10	99371729	C	A	0.324056	1.61712e-49	0.0661784065004	0.00447353	HOGA1:PI4K2A:PI4K2A	UTR3
rs12612949	2	78623415	C	T	0.32505	2.14786e-49	0.0543832251962	0.00368095	CYCSP6	intergenic
rs111626798	4	119352517	T	C	0.0924453	3.2655e-49	-0.143712129202	0.00974585	NDUFS5P5	intergenic
rs895665	2	30854803	A	G	0.159046	3.73776e-49	-0.0514851485409	0.00349363	LCLAT1	intronic
rs78786063	8	19223674	C	T	0.180915	3.86021e-49	4.6623211432	0.316418	SH2D4A	intronic
rs11569688	11	114183443	A	G	0.186879	3.93587e-49	-0.0800105101425	0.00543056	RP11-64D24.2:NNMT	ncRNA_intronic
rs4734825	8	105878647	G	T	0.150099	5.53815e-49	-0.058676583726	0.00398882	RP11-127H5.1	intronic
rs34666750	3	159677536	C	A	0.152087	5.99237e-49	-0.0867022374741	0.00589613	IL12A-AS1	ncRNA_intronic
rs74745318	7	42189656	T	G	0.189861	7.91455e-49	0.0658124764196	0.00448128	GLI3	intronic
rs17055785	18	72576774	G	A	0.0934394	9.76814e-49	-0.12159412679	0.00828759	ZNF407	intronic
rs11643263	16	61856300	G	A	0.184891	1.37252e-48	-0.0692540383928	0.00472765	CDH8	intronic
rs12583797	13	35511359	C	T	0.173956	2.03466e-48	0.0853733761099	0.00583871	NBEA	intergenic
rs6667673	1	166777148	G	A	0.335984	2.36547e-48	-0.0500642789456	0.00342631	CNN2P10	intergenic
rs4796734	17	40046569	C	T	0.261431	3.00164e-48	-0.0569056798925	0.00389886	ACLY	intronic
rs8020911	14	82250573	T	C	0.209742	3.04196e-48	0.0597638608729	0.00409494	RP11-666E17.1	ncRNA_intronic
rs4935892	11	124581323	A	G	0.232604	3.13512e-48	0.071284646177	0.00488502	SPA17	intergenic
rs11083800	19	46637181	C	A	0.427435	3.48438e-48	0.0551196181204	0.00377912	AC007193.6	ncRNA_intronic
rs55698841	13	110893414	G	A	0.171968	6.07254e-48	0.0677064863551	0.00465422	COL4A1	intronic
rs1396731	2	22716219	T	A	0.286282	6.67062e-48	0.0667198536135	0.00458843	AC068490.2	ncRNA_intronic
rs4977860	9	20969148	C	T	0.363817	7.5005e-48	0.03790234585	0.00260804	FOCAD	intronic
rs220729	6	160323406	G	A	0.229622	8.30962e-48	-0.0372462905763	0.00256414	RP1-249F5.3	ncRNA_exonic
rs11147288	12	133767153	A	G	0.264414	9.50446e-48	0.0607671326258	0.00418603	ZNF268:CTD-2140B24.4	intronic
rs62020814	15	90008412	G	A	0.185885	1.01532e-47	-0.0705744576656	0.00486314	RHCG	intronic
rs690107	15	54108161	C	A	0.140159	1.26785e-47	-0.0516594905849	0.00356349	RP11-643A5.1	intergenic
rs144604835	2	172500113	A	T	0.233598	1.31154e-47	0.0675160746952	0.00465803	DYNC1I2	intergenic
rs6738671	2	165900578	T	A	0.208748	2.20305e-47	0.0599108087375	0.00414353	AC013463.2	ncRNA_intronic
rs10808999	8	38821327	G	A	0.141153	2.5464e-47	0.00309003440237	0.000213859	PLEKHA2	intronic
rs7598644	2	238187069	C	G	0.407555	3.66382e-47	0.0682454085374	0.00473143	AC112715.2	intergenic
rs10994080	10	61702632	C	T	0.119284	4.10695e-47	0.0995139932461	0.00690304	C10orf40	intergenic
rs13259255	8	79837489	C	T	0.137177	4.56894e-47	0.0761351312025	0.00528401	RP11-79H23.3	intergenic
rs2862148	7	153437424	T	C	0.329026	4.57507e-47	0.0466560775042	0.00323809	DPP6	intergenic
rs2216752	5	96185467	A	G	0.282306	5.09188e-47	-0.068346986544	0.00474595	CTD-2260A17.2	intronic
rs111473930	6	11097291	A	G	0.164016	5.68803e-47	0.0633339627768	0.00440019	SMIM13	intronic
rs167584	4	25348323	G	A	0.125249	5.8919e-47	0.0807657427761	0.00561223	ZCCHC4	intronic
rs614615	11	100669925	C	T	0.456262	6.03132e-47	-0.0346693984117	0.00240937	ARHGAP42	intronic
rs12819406	12	69696400	T	G	0.428429	1.22927e-46	0.037749346088	0.00263244	RP11-1143G9.2	intergenic
rs7300177	12	90864963	C	A	0.366799	1.62433e-46	-0.0576851784575	0.00402809	RP11-632B21.1	intergenic
rs6056626	20	9421037	C	T	0.153082	2.48853e-46	0.0874946874747	0.00612234	PLCB4	intronic
rs735868	2	42272389	C	G	0.100398	2.8886e-46	0.0391521546015	0.00274162	PKDCC	intergenic
rs12041160	1	234420229	A	T	0.266402	3.06387e-46	-0.0541940407069	0.00379602	SLC35F3	intronic
rs62032858	16	54316914	T	C	0.194831	7.21999e-46	-0.0715110970565	0.00503008	IRX3	downstream
rs10763527	10	59738121	A	G	0.213718	7.40486e-46	-0.041166097069	0.00289598	MRPS35P3	intergenic
rs78597388	14	88129695	A	G	0.126243	8.3125e-46	0.0938608821229	0.00660675	CTD-2007A10.1	intergenic
rs10086269	8	108140601	C	G	0.310139	8.82719e-46	-0.0626318437217	0.00440988	HMGB1P46	intergenic
rs4768983	13	29159684	A	C	0.256461	9.0357e-46	-0.0585782391651	0.00412495	EIF4A1P7	intergenic
rs1860704	7	119927993	A	G	0.192843	1.12976e-45	-0.037487579858	0.00264271	KCND2	intronic
rs12518779	5	44185433	C	G	0.0994036	2.55575e-45	-0.0792587412922	0.00561008	FGF10	intergenic
rs2166499	2	43169289	G	A	0.414513	2.97551e-45	0.0619818747156	0.00439052	AC016735.1	intergenic
rs73055055	19	53446824	T	C	0.247515	3.22065e-45	0.0776360253499	0.00550156	ZNF816:ZNF321P	intronic
rs5767410	22	47309007	A	G	0.249503	3.268e-45	0.0612347955117	0.00433963	TBC1D22A	intronic
rs61796125	4	13112907	C	T	0.314115	3.46329e-45	-0.0597880790382	0.00423833	RNU6-962P	intergenic
rs3100108	2	84029777	A	T	0.312127	3.57907e-45	-0.0317839497015	0.00225351	SNORD112	intergenic
rs3818932	9	111664178	C	T	0.269384	9.11235e-45	-0.0602545400697	0.00429221	IKBKAP	intronic
rs7653602	3	8597771	T	G	0.228628	1.05572e-44	0.0658650227562	0.00469537	LMCD1-AS1:LMCD1	ncRNA_intronic
rs34064794	1	221458189	G	A	0.255467	1.59886e-44	-0.044311509855	0.00316552	RP11-421L10.1	intergenic
rs56386167	3	186128772	G	A	0.218688	1.94723e-44	-0.0550540884262	0.00393689	RP11-78H24.1	intergenic
rs16950191	17	49710443	A	C	0.22664	2.01545e-44	-0.0641269627988	0.00458648	CA10	intronic
rs11725491	4	104965585	A	G	0.185885	2.0833e-44	0.065954488524	0.00471799	RP11-703G6.1	intergenic
rs2243643	6	102571872	T	G	0.451292	2.64803e-44	-0.0488908782145	0.00350164	AP002530.2	intergenic
rs2188714	7	91339855	G	A	0.256461	3.05564e-44	-0.0627109216397	0.00449474	MTERF	intergenic
rs10407637	19	9816851	G	A	0.15507	5.78588e-44	0.0659059135547	0.00473922	ZNF812	intergenic
rs353722	8	57692453	A	C	0.209742	5.7907e-44	0.064517863754	0.00463943	RP11-33E15.1	intergenic
rs12564882	1	54794930	G	A	0.148111	6.51856e-44	0.0881117841005	0.00633991	SSBP3	intronic
rs17053464	5	155780855	T	C	0.119284	7.43458e-44	-0.0954447876434	0.0068722	SGCD	intronic
rs4833389	4	128664440	T	G	0.318091	7.74042e-44	-0.0668700339444	0.00481577	SLC25A31	intronic
rs11622817	14	42684817	C	A	0.306163	9.04842e-44	-0.0565883317198	0.0040786	RP11-313C4.1	intergenic
rs2956141	18	51809122	T	A	0.27336	1.93075e-43	-0.0433123900506	0.00313404	POLI	intronic
rs12964385	18	62958173	A	G	0.149105	2.28048e-43	0.0487169898252	0.00352817	AC007631.1	intergenic
rs3209060	5	151187811	G	A	0.16004	2.45424e-43	-0.0812586489198	0.00588715	G3BP1	UTR3
rs73686889	7	32043357	G	A	0.139165	2.53902e-43	0.056937844886	0.00412585	PDE1C	intronic
rs989120	5	18012479	G	A	0.0795229	3.3369e-43	-0.0222411231923	0.00161395	RPL36AP21	intergenic
rs17721302	1	212435062	G	T	0.197813	3.57757e-43	-0.00225669249191	0.000163819	RP11-15I11.3	intergenic
rs685637	1	245163416	A	C	0.413519	4.54434e-43	-0.0296129480342	0.00215238	EFCAB2	intronic
rs113574176	2	238540704	T	G	0.124254	4.83939e-43	0.103688170715	0.00753893	LRRFIP1	intronic
rs2977727	8	4838341	T	A	0.34493	6.9046e-43	0.0693152569174	0.0050492	CSMD1	intronic
rs72910264	2	186497268	C	T	0.224652	7.50788e-43	0.0698698811554	0.00509185	U8	intergenic
rs12594565	15	39176900	A	G	0.364811	9.64755e-43	-0.0520667674217	0.00379947	RP11-624L4.1	ncRNA_intronic
rs55904469	15	49789971	A	G	0.341948	1.48107e-42	0.0514530931938	0.00376324	FAM227B	intronic
rs73201027	3	127177635	C	T	0.236581	3.2197e-42	-0.0614729212712	0.00451478	RP11-59J16.1	intergenic
rs993704	4	125712060	A	G	0.313121	3.26035e-42	0.0616081745035	0.00452501	ANKRD50	intergenic
rs62062228	17	30016260	A	G	0.327038	6.73487e-42	0.0511738778725	0.00377335	RP11-805L22.1	intergenic
rs1416493	1	192231987	T	C	0.189861	6.84107e-42	-0.0423759689525	0.00312489	RP11-142L4.2	intergenic
rs1168239	2	52957508	C	T	0.185885	7.67339e-42	0.0585116885575	0.00431746	AC010967.2	ncRNA_intronic
rs7846371	8	3029409	T	G	0.416501	8.17385e-42	0.0569167133208	0.0042012	CSMD1	intronic
rs558948	6	154441864	T	C	0.225646	8.31184e-42	-0.0614968774288	0.00453969	OPRM1	intronic
rs167596	17	32212218	C	T	0.141153	8.38166e-42	-0.0499040301901	0.00368408	ASIC2	intronic
rs34810038	3	155373396	T	C	0.148111	9.46392e-42	0.0103125340127	0.000761806	PLCH1	intronic
rs4241710	4	180639279	A	T	0.410537	1.02577e-41	0.0509262225968	0.00376366	RP11-774G5.1	intergenic
rs11765929	7	90344751	T	A	0.156064	1.3619e-41	0.0452017106874	0.00334575	CDK14	intronic
rs10744415	12	129897259	A	G	0.127237	1.36927e-41	-0.0766482194634	0.00567353	TMEM132D	intronic
rs6954582	7	1462386	G	A	0.110338	1.42273e-41	0.0748609910716	0.0055424	MICALL2	intergenic
rs10207605	2	52286399	T	C	0.333002	2.80267e-41	-0.00322818174611	0.00023989	AC007682.1	ncRNA_intronic
rs12508442	4	68106430	T	C	0.360835	3.34936e-41	0.0610464740704	0.00454088	RP11-584P21.2	intergenic
rs7767196	6	90437699	A	G	0.163022	3.55519e-41	0.061218598752	0.00455517	MDN1	intronic
rs1333046	9	22124123	A	T	0.491054	6.13906e-41	-0.0385313783044	0.00287572	CDKN2B-AS1	intergenic
rs62345221	4	171887971	A	G	0.0854871	7.01515e-41	-0.139523921964	0.0104208	RP11-344G13.1	intergenic
rs1377755	2	184553811	C	T	0.136183	7.57408e-41	0.0631960002267	0.00472202	CACYBPP2	intergenic
rs73048564	11	134915316	T	C	0.158052	1.23587e-40	0.0635392881828	0.00476063	AP005135.2	intergenic
rs62229375	22	34655528	G	A	0.271372	1.37244e-40	0.0504867611304	0.00378489	LL22NC03-13G6.2	intergenic
rs9661172	1	241007710	G	A	0.282306	1.40872e-40	0.0496195530293	0.00372042	RGS7	intronic
rs55981820	6	22224866	T	C	0.164016	1.83941e-40	-0.0831723132218	0.00624549	RP11-524C21.2	intergenic
rs12148828	15	63355339	T	C	0.418489	2.60018e-40	0.0496963624125	0.00373901	TPM1	intronic
rs1458848	1	181226694	G	T	0.191849	2.78709e-40	0.048148532596	0.00362398	RP11-380B22.1	intergenic
rs1731846	7	155654231	C	T	0.37674	2.81141e-40	0.00137919300626	0.000103812	AC104133.1	intergenic
rs75670636	2	35307874	A	C	0.257455	3.39684e-40	0.0265662985662	0.00200179	AC012593.1	ncRNA_intronic
rs75722923	3	25535089	C	G	0.0944334	3.89859e-40	0.0597013347235	0.00450204	RARB	intronic
rs12426021	12	38322587	A	C	0.49503	4.19882e-40	0.0265941978791	0.00200629	RP11-297L6.2	intergenic
rs2978544	8	62141022	G	C	0.39165	4.38446e-40	-0.0339954840646	0.00256528	CLVS1	intronic
rs17518706	1	226632413	G	C	0.255467	4.42148e-40	0.0573297961592	0.00432628	RN7SKP165	intergenic
rs9809636	3	94074585	T	A	0.15507	5.72033e-40	-0.0450578778922	0.00340517	ARMC10P1	intergenic
rs9344315	6	83545301	T	G	0.16501	6.05088e-40	-0.0636889155901	0.00481472	UBE3D	intergenic
rs13201474	6	67490648	A	G	0.343936	6.15524e-40	0.0682703663586	0.00516157	RNU7-66P	intergenic
rs1555324	20	5303028	C	G	0.16501	7.87587e-40	-0.066009442029	0.00499764	PROKR2	intergenic
rs4762667	12	19853993	A	C	0.445328	8.02942e-40	-0.0425214143439	0.00321969	AEBP2	intronic
rs75729108	21	28974299	C	T	0.0994036	1.01765e-39	0.0496055037338	0.00376118	AP001607.1	intergenic
rs72712401	1	88142950	G	T	0.12326	1.06392e-39	0.0648504235237	0.00491833	RP5-1027O11.1	intergenic
rs11061419	12	131749831	T	G	0.44831	1.33129e-39	0.0516486010822	0.00392212	RPS6P20	intergenic
rs7195559	16	61615477	T	C	0.428429	1.52426e-39	-0.0538443387755	0.00409204	CDH8	intergenic
rs10874249	1	81946553	G	A	0.126243	1.71773e-39	0.0857348468611	0.00652011	LPHN2	intronic
rs347904	1	120177620	T	C	0.326044	1.93938e-39	0.0571277917933	0.00434759	ZNF697	intronic
rs31590	5	131005181	G	A	0.214712	2.04058e-39	-0.0526367336761	0.00400698	CTC-432M15.3:FNIP1	intronic
rs4921546	8	17247311	A	C	0.372763	2.11172e-39	-0.0385760250614	0.00293719	MTMR7	intronic
rs10244275	7	69801496	C	G	0.222664	2.16453e-39	0.0470085697458	0.00357975	AUTS2	intronic
rs983220	13	61647320	A	G	0.481113	2.43557e-39	-0.042521695884	0.00324028	MIR3169	intergenic
rs7698697	4	139684116	T	C	0.191849	2.49284e-39	-0.0712846562684	0.00543283	RP11-98O2.1	intergenic
rs73641257	9	9201399	C	G	0.153082	2.54246e-39	-0.0583521980219	0.00444771	PTPRD	intronic
rs56262755	16	22734236	A	G	0.156064	2.69684e-39	0.0760885610199	0.00580158	RN7SL245P	intergenic
rs872077	9	71624695	G	A	0.153082	2.84446e-39	0.0721280486286	0.0055013	PIP5K1B	downstream
rs60411126	14	51864860	A	G	0.0964215	3.02341e-39	-0.0665623746948	0.00507859	RP11-255G12.3	intergenic
rs28360463	12	121647324	A	C	0.152087	3.16637e-39	0.0758555902917	0.00578919	P2RX4	upstream
rs846340	5	33342165	T	C	0.150099	3.30929e-39	0.0714890049014	0.00545734	CTD-2066L21.3	intergenic
rs138234	22	50560372	T	C	0.481113	3.54759e-39	-0.0532018566137	0.00406297	MOV10L1	intronic
rs1276375	20	55596264	A	G	0.492048	3.61157e-39	-0.0595093519245	0.00454513	AL117380.2	intergenic
rs10072233	5	168165305	C	T	0.270378	4.14621e-39	0.062334572626	0.00476473	SLIT3	intronic
rs1159214	1	76317910	T	G	0.261431	4.293e-39	0.0556408253168	0.00425394	MSH4	intronic
rs111699884	1	46814329	C	T	0.272366	4.47997e-39	-0.0492081259482	0.00376307	NSUN4	intronic
rs10400177	10	88193911	T	C	0.117296	4.93271e-39	-0.0820048959075	0.00627463	WAPAL	intergenic
rs35929923	7	21400525	A	G	0.238569	5.32888e-39	0.00123827177306	9.47893e-05	RNU1-15P	intergenic
rs6805783	3	130483398	A	G	0.205765	5.76026e-39	0.0395115969818	0.00302597	PIK3R4	intergenic
rs688871	13	51328057	A	G	0.449304	6.3798e-39	-0.0421616738363	0.00323085	DLEU7	intronic
rs9924669	16	63470727	A	C	0.307157	7.29447e-39	-0.0332514164917	0.00255006	RP11-368L12.1	ncRNA_intronic
rs12504289	4	29505813	A	G	0.138171	7.37321e-39	0.0102726698248	0.000787862	RNU6-1221P	intergenic
rs62377912	5	78279013	G	A	0.177932	7.50178e-39	0.053994746567	0.00414154	ARSB	intronic
rs10460015	18	4240553	G	A	0.498012	8.39928e-39	0.0454173207398	0.00348594	DLGAP1	intronic
rs6981787	8	8785880	G	C	0.120278	9.96666e-39	0.00427841483866	0.000328713	RP11-62H7.3	intergenic
rs2250775	10	56840255	C	T	0.302187	1.14672e-38	-0.0542913331187	0.00417467	PCDH15	intronic
rs35383016	4	160464731	A	G	0.322068	1.29853e-38	0.0453443479274	0.00348925	U3	intergenic
rs1426870	18	24789581	C	T	0.167992	1.64849e-38	0.0249263363826	0.00192078	RP11-57J16.1	intergenic
rs16896911	4	18306797	A	G	0.321074	1.76792e-38	-0.0510263055244	0.00393363	RP11-608B3.1	intergenic
rs59414041	13	100580713	A	G	0.143141	2.09575e-38	-0.0911036409874	0.00703027	CLYBL	intergenic
rs340316	3	158575264	G	T	0.214712	2.237e-38	-0.0518411140956	0.00400201	GPR79	intergenic
rs10026779	4	84171847	A	C	0.210736	2.23852e-38	-0.058979856673	0.00455312	RP11-576N17.3	intergenic
rs1563895	2	84817714	T	C	0.075547	2.41385e-38	0.166921590694	0.0128918	DNAH6	intronic
rs2177168	7	3532425	C	G	0.207753	2.92705e-38	-0.0283399264252	0.00219127	SDK1	intronic
rs10763787	10	30700753	A	G	0.291252	3.41226e-38	0.0381656929581	0.0029537	RP11-449I17.5	intergenic
rs80022176	14	95142545	C	T	0.219682	3.91614e-38	-0.0490934256327	0.00380253	RP11-986E7.2	upstream
rs16910506	8	140363932	C	T	0.274354	3.93445e-38	0.0612236421774	0.00474221	RP11-398H6.1	intergenic
rs7821573	8	98183684	A	G	0.120278	4.37974e-38	0.0884005212355	0.00685164	CPQ	intergenic
rs7130741	11	134604912	T	C	0.149105	4.93665e-38	0.0526666896055	0.00408494	RP11-469N6.1	upstream
rs7353304	20	46075606	T	C	0.121272	4.97213e-38	-0.0580278058448	0.00450096	RPL35AP	intergenic
rs842882	4	72677503	C	T	0.189861	5.60907e-38	0.0758496061784	0.00588756	GC	intergenic
rs4440641	8	24091217	A	G	0.270378	5.80367e-38	-0.0347540828963	0.00269822	RP11-203E8.1	intergenic
rs2052822	7	52932424	T	C	0.324056	7.22033e-38	-0.0401623292398	0.00312219	RP11-398K14.1	intergenic
rs11063613	12	5419035	C	A	0.284294	7.33679e-38	-0.061665788002	0.00479431	RP11-1038A11.3	ncRNA_intronic
rs7729082	5	76142020	G	A	0.22664	7.54569e-38	0.0678556828193	0.00527644	S100Z	intergenic
rs11909317	21	23172064	T	C	0.139165	7.66696e-38	0.0604104884834	0.00469796	AP000475.2	intergenic
rs73242422	4	39868012	T	C	0.0874751	7.78973e-38	-0.0617776486669	0.00480473	PDS5A	intronic
rs4479965	6	130593687	C	T	0.285288	8.16666e-38	0.0321738806448	0.00250302	SAMD3	intronic
rs2084003	3	133284441	A	G	0.244533	8.65037e-38	-0.050838813235	0.00395646	CDV3	intergenic
rs2912267	8	3882571	G	A	0.287276	8.73486e-38	-0.0306974626875	0.00238913	CSMD1	intronic
rs10470886	4	89902397	G	A	0.463221	1.01494e-37	0.0551349080181	0.00429494	FAM13A	intronic
rs1936894	6	19673412	A	G	0.252485	1.15957e-37	0.0618343132805	0.00482069	RP1-167F1.2	ncRNA_intronic
rs10763675	10	29211930	G	A	0.17495	1.1706e-37	-0.0725607957588	0.00565726	RP11-492M23.2	intergenic
rs1571052	13	46554849	G	A	0.322068	2.17736e-37	0.0329973659068	0.00258237	ZC3H13	intronic
rs1564483	18	60794654	T	C	0.251491	2.39541e-37	0.0026321869489	0.000206114	BCL2	UTR3
rs1330187	9	103711370	T	G	0.331014	2.43267e-37	0.0113196180663	0.00088647	GAPDHP26	intergenic
rs73251979	5	115040470	C	T	0.28827	2.48961e-37	-0.0471672009629	0.00369431	CTC-505O3.3	intergenic
rs60445937	6	164956606	A	G	0.161034	2.75565e-37	-0.0543755076044	0.00426153	RP11-347L18.1	intergenic
rs7231518	18	9456965	T	C	0.247515	2.78814e-37	0.056896661114	0.00445944	RP11-61L19.2	intergenic
rs668600	12	129431049	A	G	0.241551	2.85841e-37	-0.034468206175	0.00270196	GLT1D1	intronic
rs62133078	2	37226299	T	C	0.474155	3.27345e-37	0.0409519179904	0.00321287	HEATR5B	intronic
rs7605323	2	70783827	C	T	0.293241	3.7437e-37	0.0531658438357	0.00417455	TGFA	intergenic
rs3212402	5	52306044	T	A	0.197813	4.24238e-37	-0.0509207439422	0.00400133	ITGA2	intronic
rs35828806	2	183355241	T	C	0.358847	4.56134e-37	0.0571891415615	0.0044959	PDE1A	intronic
rs1479759	4	37372345	A	G	0.445328	6.79664e-37	-0.0493346930709	0.00388796	KIAA1239	intronic
rs7550648	1	224707177	T	C	0.171968	6.99101e-37	-0.0430456712106	0.00339293	CNIH3	intergenic
rs11225990	11	103608381	T	C	0.120278	1.2102e-36	0.0893517845144	0.00706683	RP11-563P16.1	ncRNA_intronic
rs4710218	6	167637030	G	C	0.217694	1.36787e-36	-0.0593747779169	0.00469953	RP11-568A7.3	intergenic
rs28709905	7	125529516	C	T	0.157058	1.77279e-36	0.0741991140222	0.00588238	AC005276.1	intergenic
rs6505054	17	54468973	G	C	0.219682	2.62876e-36	0.0475564647737	0.00377951	ANKFN1	intronic
rs117199891	22	17780188	G	C	0.120278	3.8858e-36	0.0861194478671	0.00686112	CECR9	intergenic
rs27066	5	1359133	C	T	0.133201	4.41838e-36	-0.0742992525616	0.00592421	RP11-325I22.2	intergenic
rs1404028	1	106077515	T	C	0.189861	4.57919e-36	0.0495447968702	0.00395132	RP11-251P6.1	intergenic
rs1531729	3	99075918	T	C	0.291252	4.94536e-36	0.0359196826936	0.00286608	AC078828.1	intergenic
rs12061508	1	196584468	A	G	0.242545	4.9492e-36	-0.0550338104432	0.00439124	KCNT2	intergenic
rs17061493	3	59920186	C	T	0.151093	1.21379e-35	0.0717432735188	0.00575729	FHIT	intronic
rs3817083	4	100478624	T	C	0.184891	1.25835e-35	0.0562622179531	0.004516	TRMT10A	intronic
rs3789343	20	13498547	C	T	0.251491	1.78027e-35	-0.00349910079385	0.000281488	TASP1	intronic
rs62266411	3	116922925	T	C	0.172962	2.00386e-35	0.0613012079985	0.00493519	LSAMP	intronic
rs34150222	9	19313913	G	A	0.0984095	2.19267e-35	-0.112946422861	0.00909827	DENND4C	intronic
rs11787376	8	119784816	A	C	0.248509	2.55594e-35	-0.0495353185183	0.00399421	RPS26P35	intergenic
rs11927752	3	78192962	T	C	0.267396	2.63067e-35	-0.0503144688387	0.00405779	RN7SKP61	intergenic
rs2045098	4	69337660	A	G	0.478131	2.83641e-35	-0.0595188809151	0.00480245	TMPRSS11E	intronic
rs6723426	2	64983495	C	T	0.266402	3.22081e-35	0.0427817982279	0.00345482	SERTAD2	intergenic
rs78810435	15	73116649	A	G	0.101392	4.17944e-35	0.0679700764178	0.00549817	ADPGK-AS1	intergenic
rs11736001	4	149813345	T	G	0.276342	4.92978e-35	-0.0394087391125	0.00319124	CTB-191D16.1	intergenic
rs9396249	6	56866094	T	C	0.243539	4.98308e-35	-0.0571530206217	0.00462846	BEND6	intronic
rs62138589	2	53532141	T	C	0.191849	7.97349e-35	0.0615832025665	0.00500258	SCARNA16	intergenic
rs612195	13	91794069	T	C	0.203777	8.73486e-35	-0.0586278302686	0.00476536	LINC00379	intergenic
rs11684913	2	24826852	C	A	0.224652	9.19855e-35	0.0460483183343	0.00374415	NCOA1	intronic
rs17461309	1	222551394	A	C	0.454274	1.1638e-34	-0.0416396040937	0.00339092	RP11-400N13.1	ncRNA_intronic
rs807903	6	164588002	A	C	0.197813	1.30213e-34	0.0703056862201	0.00572958	RP1-155D22.1	intergenic
rs2094667	13	20909520	G	A	0.121272	1.43374e-34	-0.0620240505372	0.00505788	CRYL1	intergenic
rs57283040	8	39820285	T	C	0.188867	1.48651e-34	0.054612299	0.00445454	RP11-44K6.3:IDO2	ncRNA_intronic
rs75825758	8	69717890	T	A	0.0795229	1.75464e-34	0.0341523632215	0.00278875	C8orf34	intronic
rs77625383	5	157231462	C	T	0.0964215	2.02603e-34	-0.0450115527246	0.00367898	CLINT1	intronic
rs12644218	4	148017274	G	C	0.361829	2.10744e-34	0.0547258909577	0.00447414	RP11-292D4.3	intergenic
rs1107212	15	101566456	C	T	0.234592	2.19699e-34	-0.0533836888135	0.00436561	LRRK1	intronic
rs36710	5	127559444	G	A	0.225646	2.5957e-34	-0.0442177045958	0.00362005	SLC12A2	intergenic
rs2963920	5	145514649	T	C	0.33002	2.59956e-34	0.0314193365993	0.00257229	LARS	intronic
rs302596	6	39671680	T	C	0.100398	3.03956e-34	0.0770622766533	0.00631564	KIF6	intronic
rs11162255	1	77514203	C	T	0.0944334	3.12105e-34	0.0486511974704	0.00398791	ST6GALNAC5	intronic
rs7563924	2	68589234	C	T	0.0974155	4.95034e-34	-0.0748001561134	0.00615029	AC015969.3	ncRNA_exonic
rs34755418	7	155043339	G	C	0.318091	5.59325e-34	-0.0320255295684	0.0026354	AC099552.2	intergenic
rs4680766	3	28653629	A	G	0.229622	7.20489e-34	0.0558634151802	0.00460488	LINC00693	ncRNA_intronic
rs57795290	10	18992509	G	A	0.243539	1.20254e-33	-0.0291276939758	0.00240937	ARL5B	intergenic
rs6837888	4	27179467	A	C	0.134195	1.24958e-33	-0.0684893497583	0.00566675	AC024132.1	intergenic
rs9985159	21	42848684	T	C	0.229622	1.31893e-33	0.0539929835585	0.00446897	TMPRSS2	intronic
rs6112285	20	19259163	C	T	0.102386	1.54314e-33	-0.0531426936051	0.0044033	SLC24A3:RP5-1027G4.3	ncRNA_intronic
rs572796	1	218294727	T	A	0.162028	1.72639e-33	0.0670314453352	0.00555835	RNU1-141P	intergenic
rs1557678	9	136715121	C	T	0.15507	1.84027e-33	-0.0559986603584	0.00464552	VAV2	intronic
rs55649806	12	40907593	A	G	0.170974	1.9431e-33	0.0452940052327	0.00375889	MUC19	intronic
rs73329708	17	64695287	T	C	0.16998	2.34085e-33	-0.0708347544559	0.00588598	PRKCA	intronic
rs9638326	7	73826764	C	T	0.337972	2.35557e-33	0.0333690524498	0.0027729	CLIP2	intergenic
rs10784523	12	66697400	C	T	0.464215	2.72237e-33	0.0503764080826	0.00419035	HELB	intronic
rs868547	15	91498760	A	G	0.250497	2.89248e-33	-0.00335307779291	0.000279028	RCCD1	intronic
rs28458357	14	98194527	C	T	0.232604	2.92162e-33	-0.02953695195	0.0024581	RP11-204N11.1	intergenic
rs891403	8	40337470	A	G	0.239563	3.43548e-33	-0.0408444055287	0.00340291	RP11-301G7.1	intergenic
rs859107	1	95315420	C	T	0.151093	3.50884e-33	-0.0508378877376	0.00423613	SLC44A3:RP11-465K1.2	ncRNA_intronic
rs7691063	4	107418496	G	A	0.49006	4.18764e-33	0.0502621454785	0.00419327	RP13-612N21.1	intergenic
rs13195737	6	63045020	G	C	0.410537	4.71753e-33	-0.0400654285739	0.00334533	KHDRBS2	intergenic
rs80067291	1	34899796	T	C	0.144135	5.67048e-33	0.0394634721986	0.00329928	RP4-657M3.2	intergenic
rs60652614	11	118168543	T	G	0.342942	5.95669e-33	-0.0410875713609	0.00343623	CD3E	intergenic
rs61976859	14	31583512	T	C	0.139165	6.30643e-33	-0.0868599608124	0.00726715	HECTD1	exonic
rs2112882	5	103086522	C	G	0.308151	6.82176e-33	-0.0450446250835	0.00377072	NUDT12	intergenic
rs16975755	15	96419855	G	A	0.148111	7.72296e-33	0.0672149480194	0.00563148	RNU2-3P	intergenic
rs13010506	2	147728038	A	G	0.265408	9.31251e-33	-0.00172730635778	0.000144908	AC062032.1	intergenic
rs225884	14	30473054	A	G	0.312127	1.08838e-32	-0.0287266506183	0.00241259	PRKD1:CTD-2251F13.1	ncRNA_intronic
rs2063516	3	122435729	A	G	0.208748	1.12688e-32	0.0366606464583	0.00307967	PARP14	intronic
rs55655349	6	118062315	G	C	0.385686	1.47966e-32	0.0449463252115	0.00378293	NUS1	intergenic
rs9526424	13	48540836	A	C	0.181909	1.52136e-32	-0.0521889922492	0.00439337	SUCLA2	intronic
rs62166635	2	134854023	G	T	0.0805169	2.1985e-32	-0.109431813895	0.00923615	MGAT5	intergenic
rs12071990	1	41902954	C	T	0.10338	2.20474e-32	0.0414048623555	0.00349468	RNA5SP45	intergenic
rs2085673	6	153861513	C	G	0.370775	2.63464e-32	0.0282149112588	0.00238442	RNA5SP225	intergenic
rs4767427	12	117065371	T	C	0.405567	3.4562e-32	0.0395564883075	0.00334934	RP11-497G19.3	intergenic
rs1002887	13	79782087	C	G	0.164016	3.57621e-32	0.0653957072586	0.00553856	BCAS2P3	intergenic
rs2271882	19	18309365	G	A	0.275348	3.87564e-32	0.0479501912934	0.00406337	RAB3A	intronic
rs149194	16	65897016	C	T	0.186879	4.28052e-32	-0.0557555558586	0.00472816	RP11-513N24.1	ncRNA_exonic
rs4895472	6	137287954	C	T	0.247515	4.4857e-32	0.0540248450329	0.00458293	RPL35AP3	intergenic
rs60986466	8	41492935	T	G	0.213718	5.03535e-32	0.0371141139331	0.00315099	NKX6-3	intergenic
rs7645960	3	29874266	A	C	0.0795229	5.35303e-32	0.100474679683	0.00853405	RBMS3	intronic
rs11607526	11	59166402	A	G	0.242545	6.0757e-32	-0.0480695882389	0.00408661	OR5BB1P	intergenic
rs1693951	16	86266440	G	A	0.472167	6.61994e-32	-0.0320501065738	0.0027264	LINC01081	ncRNA_intronic
rs4062107	19	3166907	A	G	0.315109	6.86424e-32	0.0480524959459	0.00408874	GNA15	intergenic
rs149524083	14	78182940	A	G	0.0884692	7.3788e-32	0.09292755501	0.00791123	SLIRP	intronic
rs786320	9	79236165	A	G	0.153082	7.74801e-32	0.0457921554456	0.00389981	PRUNE2	intronic
rs1424987	2	53426610	C	G	0.235586	7.75025e-32	0.052983636008	0.00451226	SCARNA16	intergenic
rs2847028	18	85021	T	C	0.452286	8.65678e-32	-0.0477947646206	0.00407361	IL9RP4	ncRNA_intronic
rs7526903	1	4006671	A	G	0.370775	9.39466e-32	-0.0367239642562	0.00313188	RP13-614K11.1	ncRNA_intronic
rs117824256	6	155487418	G	A	0.126243	1.04302e-31	0.0759496869047	0.00648201	TIAM2	intronic
rs7801849	7	18828709	C	T	0.176938	1.04593e-31	-0.0560411261332	0.00478299	HDAC9	intronic
rs112799769	9	96122167	A	G	0.147117	1.08012e-31	0.0548657724265	0.00468376	C9orf129	intergenic
rs9343932	6	80452014	G	A	0.124254	1.4306e-31	-0.0730538958988	0.00624916	SH3BGRL2	intergenic
rs34883452	7	101141354	G	A	0.371769	2.0488e-31	0.00103535790153	8.87984e-05	COL26A1	intronic
rs4954359	2	137475955	A	G	0.0934394	3.10162e-31	-0.0758268397513	0.00652314	THSD7B	intergenic
rs3930962	18	13999049	A	G	0.303181	3.18556e-31	0.0264608734896	0.00227679	RP11-411B10.8	intergenic
rs62176719	2	160817963	T	C	0.214712	3.65521e-31	0.0519004954049	0.00447023	PLA2R1	intronic
rs34666266	2	32926832	T	C	0.0785288	4.04883e-31	0.102258890413	0.00881428	TTC27	intronic
rs12563699	1	15553395	C	G	0.167992	4.17016e-31	0.037963719361	0.00327302	TMEM51	intergenic
rs7571667	2	207808509	A	G	0.294235	5.50452e-31	-0.0322425945368	0.00278549	CPO	intronic
rs12438094	15	47096646	A	G	0.0765408	6.06476e-31	-0.051849756187	0.0044826	RP11-627D16.1	ncRNA_intronic
rs9506114	13	29723864	T	A	0.489066	6.71428e-31	-0.0285616383576	0.00247113	MTUS2	intronic
rs1517735	12	76580497	C	T	0.139165	7.56903e-31	0.0628560339322	0.00544309	RNU6-1271P	intergenic
rs12961532	18	9657501	T	C	0.270378	8.08523e-31	-0.054814671514	0.00474908	KRT18P8	intergenic
rs1330848	9	112322087	G	C	0.387674	9.78709e-31	0.0350291565091	0.00303921	YBX1P6	intergenic
rs1852181	7	13657994	G	A	0.193837	1.00941e-30	2.81973848552	0.244704	AC011288.2	ncRNA_intronic
rs4787052	16	7691091	C	G	0.199801	1.14089e-30	-0.063716534366	0.00553454	RBFOX1	intronic
rs1597822	4	109447651	G	C	0.410537	1.17331e-30	0.0418929688325	0.00363967	RPL34-AS1	intergenic
rs888936	5	169923903	T	C	0.265408	1.44271e-30	0.0319667171549	0.00278158	KCNIP1	intronic
rs915083	10	44755406	G	T	0.146123	1.77947e-30	0.0513934716265	0.00447907	RP11-20J15.2	ncRNA_exonic
rs28562303	3	151846347	G	T	0.266402	2.37409e-30	0.00781643752814	0.000682708	RP11-246A10.1	ncRNA_intronic
rs56155810	3	151507013	G	A	0.172962	2.3848e-30	0.0473361576567	0.0041346	RP11-454C18.2	ncRNA_intronic
rs1795959	17	77148939	T	C	0.122266	2.6048e-30	-0.0728918834034	0.00637104	RBFOX3	intronic
rs374379	5	142996141	T	C	0.0964215	2.97753e-30	0.0562259402594	0.00491936	CTB-57H20.1	ncRNA_intronic
rs4357381	9	30248450	G	C	0.157058	3.57128e-30	-0.0392624808304	0.00343994	snoU13	intergenic
rs2631493	11	24853023	G	A	0.129225	3.86304e-30	0.055657753377	0.00487931	LUZP2	intronic
rs1827327	6	117944124	C	T	0.298211	4.48831e-30	0.0439778623062	0.0038598	NEPNP	intergenic
rs600653	6	101370944	T	C	0.217694	4.50455e-30	-0.0589026177323	0.00516984	RP3-467N11.2	intergenic
rs6983967	8	59858916	C	T	0.316103	4.72096e-30	-0.0511977176639	0.0044952	TOX	intronic
rs10504574	8	75252630	A	C	0.190855	6.66291e-30	0.0589633044787	0.00519072	GDAP1	intergenic
rs4337724	4	21705919	C	G	0.409543	6.6916e-30	0.0420268506524	0.00369988	KCNIP4:RP11-556G22.2	ncRNA_intronic
rs13016383	2	167378139	T	G	0.450298	7.15684e-30	0.0425610313175	0.00374884	SCN7A	intergenic
rs34291690	1	120099137	A	G	0.188867	8.17778e-30	0.0519053248489	0.0045766	GAPDHP27	intergenic
rs16852735	2	167719276	T	C	0.146123	8.20428e-30	0.04112430514	0.00362611	XIRP2	intergenic
rs1604180	13	85606554	A	G	0.189861	9.62312e-30	-0.0561213301607	0.00495456	LINC00375	intergenic
rs9520225	13	107516667	C	T	0.232604	9.72246e-30	0.0410025903866	0.00362012	PPIAP24	upstream
rs1638006	7	157485165	G	T	0.228628	1.00021e-29	0.0216615365913	0.00191292	PTPRN2	intronic
rs10273340	7	89693450	A	G	0.23161	1.03198e-29	-0.0333499789099	0.00294583	STEAP2-AS1	ncRNA_intronic
rs1583606	6	74655140	T	C	0.266402	1.09813e-29	-0.0459340469842	0.00405935	TXNP7	intergenic
rs10404200	19	20402947	C	G	0.187873	1.48175e-29	0.0541678623673	0.00479815	CTC-260E6.6	ncRNA_intronic
rs80086271	2	106667037	A	G	0.132207	1.49488e-29	-0.0549127273376	0.00486446	C2orf40	intergenic
rs34699441	11	25843026	T	C	0.199801	1.50106e-29	0.0482634613415	0.00427557	RP11-405K6.1	intergenic
rs521702	1	189634377	G	C	0.451292	1.59212e-29	0.047777053553	0.00423443	RNA5SP73	downstream
rs62486975	7	138478420	G	C	0.0984095	1.6173e-29	-0.0502803286717	0.00445683	ATP6V0A4	intronic
rs74356030	8	39027541	C	T	0.136183	1.85898e-29	-0.0642530694728	0.00570157	ADAM32	intronic
rs78519668	10	69392305	C	G	0.145129	2.21456e-29	0.0626118205821	0.00556354	CTNNA3	intronic
rs72820428	10	61888113	T	C	0.139165	2.82899e-29	0.0621978347757	0.00553739	ANK3	intronic
rs2514680	8	101222499	G	A	0.363817	3.88866e-29	0.0322419042748	0.00287766	SPAG1	intronic
rs6595812	5	127575603	A	G	0.128231	4.0262e-29	0.0687701774645	0.00613958	FBN2	intergenic
rs583413	15	33885521	G	A	0.11829	4.1184e-29	0.0668670682794	0.00597075	RYR3	intronic
rs73194855	4	59924190	T	C	0.279324	4.18769e-29	-0.0422458132205	0.00377274	RP11-340A13.3	ncRNA_intronic
rs12064514	1	240890859	T	G	0.159046	4.36185e-29	-0.0567220025365	0.00506717	RP11-80B9.4	intergenic
rs61853675	10	73570889	G	A	0.22167	4.53251e-29	-0.0456409238349	0.0040785	CDH23	intronic
rs394416	19	11942615	C	A	0.403579	5.70525e-29	0.0407724655127	0.00365011	ZNF440	exonic
rs17293359	4	128083879	A	G	0.252485	6.89973e-29	-0.00253293060465	0.000227101	RP11-125O18.1	ncRNA_intronic
rs1480707	2	180709478	A	T	0.266402	8.2024e-29	0.0113127056824	0.00101569	ZNF385B	intronic
rs59591654	4	61291863	T	C	0.115308	8.27918e-29	-0.0752663321321	0.00675818	AC095061.1	intergenic
rs62002378	15	39805096	G	A	0.149105	1.05797e-28	0.0389075988891	0.00350039	RP11-27M9.1	ncRNA_intronic
rs218049	5	9602682	T	C	0.22167	1.28308e-28	-0.034439198837	0.00310319	CTD-2001E22.1	intergenic
rs747754	6	170584403	T	C	0.312127	1.31508e-28	-0.0424013787207	0.0038214	RP5-894D12.5:RP5-894D12.3	ncRNA_exonic
rs13075027	3	66301274	G	A	0.276342	1.33887e-28	0.0321319622714	0.00289629	SLC25A26	intronic
rs1755776	14	36693285	A	G	0.318091	1.44839e-28	0.0387927386248	0.00349889	RP11-259K15.2	ncRNA_intronic
rs702356	6	147934061	G	A	0.254473	1.60896e-28	0.0279054390233	0.00251906	SAMD5	intronic
rs13380379	15	97162132	G	A	0.421471	1.73203e-28	0.0277060005202	0.00250255	CTD-2027G2.1	intergenic
rs1114325	7	85606292	T	A	0.215706	1.91014e-28	-0.039648910693	0.00358413	SOCS5P1	intergenic
rs16904256	8	131384143	C	T	0.198807	1.96014e-28	-0.0510996527056	0.00462021	ASAP1	intronic
rs1416718	10	130161888	G	A	0.190855	1.97893e-28	-0.0230364418602	0.00208301	RP11-264E18.1	intergenic
rs3766296	1	31820223	A	G	0.387674	2.53894e-28	-0.0342394714861	0.0031023	ZCCHC17	intronic
rs114395283	5	161090618	A	T	0.177932	2.63624e-28	0.0553607989696	0.00501755	GABRA6	intergenic
rs10831255	11	94361703	T	C	0.248509	2.98927e-28	0.0365139068787	0.00331278	RP11-867G2.8	ncRNA_intronic
rs62406770	6	69802816	A	G	0.186879	3.72534e-28	0.051958084929	0.00472248	BAI3	intronic
rs2730721	12	119090391	T	C	0.446322	4.15947e-28	0.0385027457388	0.00350269	RP11-121J20.1	intergenic
rs10265062	7	115283436	C	A	0.126243	4.29915e-28	0.0643159590641	0.00585256	RP11-458K10.1	intergenic
rs2773300	6	5242329	G	A	0.186879	6.77228e-28	0.0480882399362	0.00439231	LYRM4	intronic
rs2824250	21	18542872	T	G	0.27833	7.34106e-28	-0.0445977661115	0.00407622	NEK4P1	intergenic
rs299704	18	46147078	A	G	0.239563	7.52567e-28	-0.0470098136662	0.00429756	CTIF	intronic
rs112799026	4	61602441	T	C	0.158052	8.74637e-28	-0.0365564171478	0.0033461	RP11-593F5.2	intergenic
rs12681888	8	3170396	C	G	0.153082	9.46688e-28	0.0385325512592	0.0035293	CSMD1	intronic
rs35198068	10	114754784	C	T	0.317097	1.107e-27	-0.029240675864	0.00268173	TCF7L2	intronic
rs9318525	13	78768941	T	C	0.069583	1.1891e-27	0.0749839504033	0.00688105	RNF219-AS1	ncRNA_intronic
rs10029616	4	162239084	G	C	0.191849	1.1954e-27	0.0569503141356	0.00522639	RP11-234O6.2	intergenic
rs10036772	5	51224833	T	C	0.188867	1.31537e-27	-0.0538524596528	0.00494605	KATNBL1P4	intergenic
rs2242531	14	21998108	G	A	0.367793	1.39752e-27	0.033074545872	0.00303925	SALL2	intronic
rs147301664	6	131849850	G	C	0.114314	1.44078e-27	0.0610237509549	0.00560897	ARG1	intergenic
rs4951568	1	212292090	T	C	0.224652	1.54744e-27	0.0403256174811	0.00370873	DTL	intergenic
rs10187719	2	31600146	C	T	0.267396	1.69437e-27	0.0411678172005	0.00378907	XDH	intronic
rs10919489	1	170807335	A	G	0.121272	1.70228e-27	0.0497943024271	0.00458323	MROH9	intergenic
rs6953679	7	147438666	G	A	0.266402	1.77136e-27	-0.0407670047942	0.00375358	CNTNAP2	intronic
rs2073209	6	110636857	G	A	0.106362	1.80788e-27	-0.0585899511675	0.00539554	METTL24	intronic
rs79373538	3	61249760	C	T	0.159046	1.84909e-27	-0.0373704610045	0.00344209	FHIT	intergenic
rs80147256	2	128986764	T	C	0.204771	1.86862e-27	0.00113218286431	0.000104291	HS6ST1	intergenic
rs10888935	1	56060951	A	T	0.412525	1.98426e-27	-0.0470236256144	0.00433379	RP11-466L17.1	ncRNA_intronic
rs17808028	14	62556950	C	A	0.267396	2.10003e-27	0.0482860461439	0.00445227	SYT16	intronic
rs12332147	5	20565179	A	G	0.134195	2.25393e-27	0.059584859698	0.00549736	CDH18	intronic
rs11598876	10	6159712	C	G	0.156064	2.71147e-27	0.0394214871211	0.00364276	RBM17	downstream
rs62477905	7	126268341	T	C	0.166998	2.85411e-27	-0.0359189292899	0.00332054	GRM8	intronic
rs2227423	4	155492249	C	T	0.199801	3.4318e-27	-0.0410543831436	0.00380124	FGB	downstream
rs78772607	6	23544264	T	C	0.254473	3.45488e-27	0.0476182376921	0.00440924	RP4-810F7.1	intergenic
rs7504974	18	12327752	A	G	0.232604	3.87039e-27	0.0578561690072	0.0053624	TUBB6	intronic
rs1555551	13	53757540	A	G	0.489066	4.28223e-27	-0.0279720800312	0.00259483	PCDH8P1	intergenic
rs61835709	10	10524916	T	G	0.156064	4.64261e-27	0.0351140110939	0.0032596	RP11-271F18.4	intergenic
rs12477389	2	4849033	G	C	0.168986	4.87932e-27	-0.0288038832072	0.00267497	SNORA31	intergenic
rs1468150	7	114882351	C	T	0.245527	5.22435e-27	0.0253366290104	0.00235435	AC068610.5	intergenic
rs143488310	3	73782138	C	T	0.180915	5.9419e-27	-0.0552118554933	0.0051361	RP11-20B7.1	intergenic
rs10790789	11	99411774	G	T	0.392644	6.12308e-27	-0.0241365338834	0.00224589	CNTN5	intronic
rs66526436	16	86098452	G	T	0.133201	7.18291e-27	-0.0705386139755	0.00657259	RP11-805I24.1	intergenic
rs5760263	22	24611330	G	T	0.209742	7.44342e-27	-0.0343240323281	0.0031992	GGT5	intergenic
rs7159644	14	52649581	G	A	0.265408	7.68094e-27	0.0439829248267	0.00410057	RP11-1033H12.3	intergenic
rs12490436	3	146332300	A	G	0.186879	8.98738e-27	-0.0469459510562	0.00438275	PLSCR5	intergenic
rs886510	5	9155810	T	A	0.154076	9.32633e-27	0.0610497026356	0.00570127	SEMA5A	intronic
rs6136532	20	18812003	G	A	0.290258	9.57544e-27	-0.044231206808	0.00413158	C20orf78	intergenic
rs12499794	4	114722582	G	A	0.233598	9.99826e-27	0.0502775576918	0.00469811	RP11-397D21.1	intergenic
rs73849222	4	126366058	G	A	0.146123	1.0323e-26	0.0479071854778	0.00447786	FAT4	intronic
rs4888913	16	79031985	C	G	0.266402	1.08999e-26	0.0399920099947	0.00373979	WWOX:RP11-319G9.5	ncRNA_intronic
rs112782375	5	79626388	A	G	0.151093	1.09343e-26	0.0652729752284	0.00610407	RBMX2P5	intergenic
rs17167948	7	14219123	A	G	0.210736	1.23295e-26	-0.0418577316678	0.00391845	DGKB	intronic
rs8025290	15	53197480	A	C	0.33002	1.28138e-26	-0.0285921085073	0.00267751	RPSAP55	intergenic
rs209729	1	22835677	G	A	0.2833	1.33436e-26	-0.0271323044282	0.0025417	ZBTB40	exonic
rs12426190	12	126240559	G	T	0.110338	1.64494e-26	0.0737001551476	0.00691668	TMEM132B	intergenic
rs942682	1	85346891	C	T	0.229622	1.68123e-26	-0.0357661224654	0.00335725	LPAR3	intronic
rs2505673	6	2356229	G	A	0.199801	1.77202e-26	-0.0481561206384	0.00452234	GMDS-AS1	ncRNA_intronic
rs4839903	6	97742108	T	G	0.247515	2.02768e-26	-0.0461875916874	0.0043426	RP3-418C23.2	ncRNA_intronic
rs34918046	16	83224540	T	G	0.163022	2.03337e-26	0.0387913654433	0.00364729	CDH13	intronic
rs74297944	7	15855298	C	G	0.154076	2.28085e-26	-0.0347079505568	0.00326664	AC006041.1	intergenic
rs4415391	9	113480169	G	A	0.11829	2.3161e-26	0.0444097779765	0.00418032	MUSK	intronic
rs13099357	3	105000469	C	A	0.243539	2.38199e-26	-0.0331586729332	0.00312201	ALCAM	intergenic
rs7088794	10	67769615	A	T	0.16501	2.49243e-26	0.0421614876533	0.00397125	CTNNA3	intronic
rs11747651	5	49444680	C	T	0.328032	2.55392e-26	-0.0242419092474	0.00228387	EMB	intergenic
rs9615326	22	48849233	T	C	0.157058	3.01416e-26	0.0355988166431	0.00335872	RP11-536P6.3	intergenic
rs9824191	3	17453982	C	T	0.224652	3.13189e-26	-0.0267309155981	0.00252289	TBC1D5	intronic
rs2270376	8	38033989	C	G	0.258449	3.24262e-26	0.0299823178545	0.00283063	LSM1	UTR5
rs11655421	17	76251518	A	T	0.258449	3.96576e-26	0.0496524659649	0.00469605	THA1P	intergenic
rs943394	9	22332703	A	G	0.498012	4.63966e-26	-0.0272329672785	0.00257924	DMRTA1	intergenic
rs7534454	1	99800965	T	C	0.232604	5.23416e-26	0.0551853591409	0.00523224	LPPR4	intergenic
rs7869023	9	130201678	G	A	0.365805	5.48165e-26	-0.0401196149907	0.00380539	ZNF79	intronic
rs76101313	7	20307093	A	G	0.0805169	6.8337e-26	-0.0164892714681	0.00156711	AC099342.1	intergenic
rs9320007	18	59950871	C	A	0.363817	7.47699e-26	-0.0410248745072	0.00390207	KIAA1468	intronic
rs12571440	10	107733803	G	C	0.235586	7.58969e-26	0.0255216121148	0.00242781	RP11-56I23.1	intergenic
rs11902035	2	233386432	A	G	0.121272	8.05406e-26	0.0750992783193	0.00714782	PRSS56	intronic
rs142231080	3	183135773	T	C	0.084493	8.23777e-26	0.0659956656521	0.00628262	MCF2L2	intronic
rs284006	16	77030322	A	G	0.159046	8.31618e-26	0.0660523285882	0.00628855	CTD-2336H13.2	intergenic
rs73538844	11	91840009	G	A	0.261431	8.79366e-26	0.0324285954105	0.00308893	RPL7AP57	intergenic
rs17586824	18	11670036	A	G	0.166004	9.21182e-26	-0.0577383701254	0.00550207	RP11-677O4.2	ncRNA_exonic
rs10951928	7	47819661	G	T	0.262425	1.1474e-25	-0.0246044748899	0.00234929	HUS1:PKD1L1	intronic
rs2170658	14	57297059	A	G	0.143141	1.40371e-25	0.0368471163988	0.00352467	OTX2-AS1:RP11-1085N6.5	ncRNA_intronic
rs72715966	14	105186163	T	C	0.192843	1.43081e-25	-0.0502133299522	0.00480407	INF2	downstream
rs1208171	7	144103132	C	T	0.146123	1.50899e-25	0.0323888395104	0.00310024	NOBOX	intronic
rs13045292	20	61004142	G	A	0.158052	1.82897e-25	0.0388960847073	0.00372963	RP5-908M14.5	upstream
rs4855940	3	117008483	C	T	0.372763	2.0601e-25	0.0339938685364	0.00326311	LSAMP	intronic
rs9359935	6	92002947	G	T	0.16998	2.56165e-25	0.0475300551108	0.00457157	RP1-177I10.1	intergenic
rs7653897	4	90169925	G	A	0.431412	2.6108e-25	0.0396983223726	0.00381895	GPRIN3	exonic
rs4908204	1	102431521	T	G	0.201789	2.63299e-25	-0.0434935695826	0.00418438	OLFM3	intronic
rs1565208	3	44233507	T	G	0.146123	2.84217e-25	0.0587559103242	0.00565669	TOPAZ1	intergenic
rs218317	5	5838682	A	G	0.374751	2.92798e-25	0.0340631828213	0.00328031	CTC-471C19.1	intergenic
rs13083665	3	46681373	A	G	0.275348	2.95029e-25	0.00329526778704	0.000317359	SNORD77	intergenic
rs970386	9	75226846	T	C	0.489066	2.96045e-25	-0.0326625666458	0.00314575	TMC1	intronic
rs2732523	11	35047330	C	T	0.377734	3.87281e-25	-0.0282941768866	0.00273178	PDHX	intergenic
rs12359257	10	99136359	T	A	0.332008	4.18877e-25	0.00164689240571	0.000159121	RRP12	intronic
rs7310233	12	11145923	A	G	0.38171	4.40849e-25	0.0364655568073	0.00352494	PRR4:TAS2R14	intergenic
rs2205736	6	114705017	C	G	0.265408	4.96611e-25	0.0277998080654	0.00269023	RP3-399L15.3	ncRNA_intronic
rs10950543	7	15008772	T	C	0.0874751	5.01997e-25	-0.0823915598941	0.00797397	DGKB	intronic
rs10133344	14	93653649	T	G	0.258449	5.26127e-25	0.0276080390983	0.00267311	RP11-371E8.4	intronic
rs7523102	1	243672074	T	C	0.259443	5.90822e-25	-0.0318757149464	0.00308965	AKT3	intronic
rs9974701	21	20034232	T	A	0.302187	6.24301e-25	0.0248002769068	0.00240508	AL109763.2	ncRNA_intronic
rs2021870	2	36708041	G	A	0.252485	6.3066e-25	0.0346330538837	0.00335896	CRIM1	intronic
rs13110947	4	36101738	A	C	0.096421	7.54173e-25	0.00768001081469	0.000746106	ARAP2	intronic
rs112590425	21	20545735	T	C	0.0944334	8.34953e-25	-0.0686436709558	0.00667502	AP000431.2	intergenic
rs73641386	9	11101296	A	C	0.0596421	9.95839e-25	-0.1032612288	0.0100579	RP11-109M17.1	intergenic
rs7305643	12	58609584	A	G	0.120278	1.08317e-24	0.0508824404659	0.00496	RPL21P103	intergenic
rs57724926	15	28150107	T	C	0.208748	1.15879e-24	-0.0372806468811	0.00363641	OCA2	intronic
rs9783302	11	49002343	G	T	0.17992	1.34912e-24	-0.046442469423	0.00453658	TRIM51GP	ncRNA_intronic
rs7711157	5	74239494	G	A	0.239563	1.37762e-24	-0.0256038182364	0.00250152	CTD-2503O16.4	ncRNA_intronic
rs13073717	3	184719233	A	G	0.285288	1.5589e-24	-0.0339164360918	0.00331755	VPS8	intronic
rs623632	7	43021943	G	A	0.343936	1.99821e-24	-0.0433347799922	0.00424882	AC005537.2	ncRNA_intronic
rs72770952	16	6004802	G	C	0.0795229	2.05026e-24	0.0326154779194	0.00319862	RP11-420N3.2	ncRNA_intronic
rs55779238	3	8868711	C	A	0.0894632	2.08923e-24	-0.0879556541459	0.0086274	CAV3:RAD18	intronic
rs2532834	10	119085744	G	A	0.151093	2.44653e-24	-0.0319089731868	0.00313461	PDZD8	intronic
rs6824938	4	2348405	A	G	0.140159	2.4958e-24	-0.0359705698793	0.00353428	ZFYVE28	intronic
rs6471139	8	134643435	C	T	0.355865	2.68638e-24	-0.0239457943301	0.00235445	SNORA40	intergenic
rs12209785	6	45506122	G	A	0.270378	2.69216e-24	0.0504437968488	0.00495994	RUNX2	intronic
rs16966654	16	63894280	C	T	0.21173	3.01027e-24	0.0391168695493	0.00385033	RP11-21L1.1	intergenic
rs72784927	10	14562201	A	G	0.21173	3.29543e-24	0.0363206262925	0.0035782	FAM107B	UTR3
rs375868	5	13619672	C	T	0.370775	3.38609e-24	0.0349932809428	0.00344833	CTC-232H10.1	intergenic
rs74541093	7	46996297	T	G	0.0934394	3.85257e-24	0.173212194027	0.01709	AC004901.1	ncRNA_intronic
rs4307768	12	14580689	C	T	0.0705765	4.17094e-24	-0.0738499395599	0.00729201	ATF7IP	intronic
rs4546036	2	3303096	C	T	0.263419	4.26509e-24	-0.0268774684357	0.00265448	TSSC1:TSSC1-IT1	ncRNA_intronic
rs73080482	12	22804193	T	G	0.329026	4.3822e-24	0.02260704334	0.0022333	ETNK1	intronic
rs3134306	8	100328798	G	A	0.171968	4.80226e-24	0.0586455019086	0.00579861	VPS13B	intronic
rs4974986	4	39166928	C	T	0.32008	4.84346e-24	-0.00130222783491	0.000128769	WDR19	intergenic
rs60739365	14	44089342	C	T	0.186879	4.94174e-24	-0.0453896251537	0.00448917	RP11-557C9.1	intergenic
rs7120623	11	33062565	C	G	0.398608	5.51378e-24	-0.0427903223321	0.00423659	TCP11L1	UTR5
rs17110313	14	80579871	C	T	0.109344	5.88777e-24	-0.0349447324849	0.00346202	DIO2	intergenic
rs9404590	6	105401013	G	T	0.184891	6.48505e-24	0.0487095683606	0.00483026	LIN28B	intergenic
rs3006381	10	44046172	T	C	0.314115	6.79203e-24	0.0370241443093	0.00367313	ZNF239	intergenic
rs9521371	13	110084960	T	C	0.16501	7.14775e-24	0.0504964230978	0.0050122	LINC00399	intergenic
rs2705843	2	14875245	C	T	0.333996	8.12879e-24	-0.000767373655622	7.62641e-05	FAM84A:AC011897.1	intergenic
rs9382207	6	53277210	A	G	0.266402	9.13471e-24	-0.039190742378	0.00389936	RN7SKP256	intergenic
rs16848007	1	201158340	G	C	0.141153	1.16806e-23	0.0518275756395	0.00516916	IGFN1	intergenic
rs4745156	9	74690404	A	G	0.222664	1.24954e-23	-0.023047400563	0.00230022	C9orf57	intergenic
rs11816645	10	72442672	T	C	0.323062	1.29986e-23	-0.00463246646065	0.000462519	ADAMTS14	intronic
rs10948626	6	51429680	G	A	0.243539	1.88309e-23	-0.0425035832599	0.00425929	RP11-793K1.1	intergenic
rs11131759	4	177706643	A	C	0.109344	1.88814e-23	0.0608009165139	0.00609303	VEGFC	intronic
rs17783779	17	32268842	G	A	0.166998	1.89293e-23	-0.0474518476198	0.00475541	ASIC2	intronic
rs1235287	21	37013592	C	T	0.17992	1.99754e-23	-0.058390403909	0.00585475	RUNX1	intronic
rs4982768	14	24007810	C	T	0.175944	2.37674e-23	-6.46003930416	0.648866	RP11-66N24.4:ZFHX2	ncRNA_intronic
rs41332844	2	192277371	G	C	0.360835	2.42155e-23	0.00134033249344	0.000134652	MYO1B	intronic
rs4570996	19	18357548	A	G	0.290258	2.53657e-23	-0.0366451483261	0.00368314	PDE4C	intronic
rs17127710	1	85918009	T	C	0.208748	2.60315e-23	-0.0486837517266	0.00489439	DDAH1	intronic
rs11049949	12	29108955	A	T	0.193837	2.62598e-23	-0.0549915992365	0.00552903	RP11-977P2.1	intergenic
rs4888772	16	78304972	C	T	0.432406	2.63252e-23	0.0248663337557	0.0025002	WWOX	intronic
rs31220	5	156590355	G	A	0.137177	3.04321e-23	-0.0426681260621	0.00429634	ITK:FAM71B	exonic
rs2094120	10	105223759	G	T	0.241551	3.05128e-23	0.0479960168369	0.00483294	RP11-225H22.4	intergenic
rs35468724	2	17394636	G	A	0.154076	3.16489e-23	-0.0364545970033	0.00367213	ZFYVE9P2	intergenic
rs8133610	21	45513545	A	G	0.17992	3.18112e-23	0.0391793974178	0.00394681	TRAPPC10	intronic
rs11221577	11	129011327	C	T	0.322068	3.20596e-23	0.0446758560591	0.00450085	ARHGAP32	intronic
rs10927478	1	14969869	C	T	0.227634	3.83737e-23	0.0269012648351	0.00271507	KAZN	intronic
rs8009933	14	39600212	A	G	0.342942	4.05962e-23	-0.0421161345998	0.00425308	GEMIN2	intronic
rs112215807	1	40384298	T	G	0.119284	4.72796e-23	-0.0741820120284	0.00750279	MYCL	intergenic
rs1689695	5	19500888	G	A	0.192843	4.85946e-23	-0.0526612787554	0.00532766	CDH18	intronic
rs2546327	5	152616309	A	G	0.156064	5.05781e-23	0.0341936215166	0.00346072	AC091969.1	intergenic
rs34605172	14	60308133	A	G	0.249503	5.21494e-23	0.0352234525359	0.00356605	RTN1	intronic
rs11891739	2	55662803	C	G	0.22167	5.33646e-23	-0.0276852868395	0.00280354	BTF3P5	upstream
rs16866472	2	7967373	C	T	0.0984095	5.46412e-23	0.0722016267323	0.00731322	AC007463.2	intergenic
rs4234265	3	33847935	A	G	0.157058	5.47881e-23	0.0253090681786	0.0025636	PDCD6IP	intronic
rs2973972	5	119260346	T	A	0.167992	5.52488e-23	0.0484825064731	0.00491129	CTC-507E12.1	intergenic
rs4653185	1	36861854	C	A	0.299205	5.73363e-23	-0.03877194393	0.00392909	LSM10	intronic
rs12584018	13	85620788	A	G	0.161034	5.75603e-23	-0.00748831519193	0.000758884	LINC00375	intergenic
rs61276079	18	20480061	A	G	0.131213	6.65321e-23	-0.0538952170793	0.00546993	RP11-739L10.1:RP11-370A5.1:RBBP8	ncRNA_intronic
rs4659829	1	238296095	C	T	0.17992	7.10651e-23	-0.0406548386565	0.00412892	YWHAQP9	intergenic
rs55767222	4	189297568	T	A	0.225646	8.72364e-23	0.0432205281336	0.00439871	NARG2P1	intergenic
rs6745448	2	160555598	A	G	0.484095	8.90809e-23	0.0353382977438	0.00359728	AC009961.3	ncRNA_intronic
rs7696173	4	91294207	A	T	0.281312	9.08753e-23	0.038284219842	0.00389796	CCSER1	intronic
rs6816911	4	117398457	G	A	0.121272	9.28837e-23	-0.0636315366611	0.00648018	RP11-55L3.1	intergenic
rs765356	20	42529720	T	C	0.239563	9.74178e-23	0.0384533821557	0.00391798	RP5-1030M6.3	intergenic
rs6879916	5	23312603	C	T	0.166004	1.0592e-22	0.0365911597423	0.00373145	CTD-2272G21.2	intergenic
rs7182700	15	41677752	G	A	0.356859	1.15144e-22	0.0416468047025	0.00425066	NDUFAF1	intergenic
rs671026	7	17095430	C	A	0.097416	1.24125e-22	-0.0496538453288	0.00507182	AC098592.8	intergenic
rs11652074	17	78773977	A	G	0.138171	1.49979e-22	-0.06110640519	0.00625386	RPTOR	intronic
rs10890702	11	107180885	T	C	0.280318	1.50197e-22	0.0345095592604	0.00353189	RP11-819C21.1	intergenic
rs8055798	16	80347251	C	A	0.470179	1.64544e-22	0.040221318029	0.00412036	RP11-525K10.3	ncRNA_intronic
rs1085461	2	145581451	G	A	0.299205	1.65095e-22	-0.0482454285857	0.00494254	TEX41	ncRNA_intronic
rs1929910	9	83311763	T	C	0.173956	1.66616e-22	-0.00104768911803	0.000107342	AL353707.1	intergenic
rs4801776	19	49304215	T	C	0.262425	1.68332e-22	0.0395890236887	0.00405655	BCAT2	intronic
rs117757936	11	84477316	G	C	0.0884692	1.70951e-22	-0.00320649347638	0.000328611	DLG2:CTD-2537O9.1	ncRNA_intronic
rs111393855	10	126136465	C	G	0.171968	1.90437e-22	0.0449518944769	0.00461198	NKX1-2:RP13-238F13.3	exonic
rs10198047	2	42024835	G	A	0.280318	2.0678e-22	0.0368238595374	0.0037813	LDHAP3	intergenic
rs1416421	6	118262263	T	C	0.224652	2.08966e-22	0.029763225802	0.00305661	SLC35F1	intronic
rs9514003	13	102905886	A	G	0.17992	2.29693e-22	0.0270489401917	0.00278061	FGF14	intronic
rs60310820	7	33186210	T	C	0.199801	2.56446e-22	-0.0378391628703	0.00389432	BBS9	intronic
rs1609912	14	83932280	G	A	0.156064	2.6039e-22	0.034161349594	0.00351637	RNU6ATAC28P	intergenic
rs6872292	5	146711782	T	A	0.133201	2.84901e-22	0.0580304960881	0.00597897	STK32A	intronic
rs17395631	12	23888223	G	T	0.0994036	2.89201e-22	0.0810696832337	0.00835404	SOX5	intronic
rs312879	17	75357691	T	C	0.233598	3.05049e-22	-0.0304007083734	0.00313448	2025-09-09	intronic
rs61923783	12	61172147	A	G	0.259443	3.1366e-22	-0.0371489241376	0.00383138	RP11-154D9.1	intergenic
rs521446	9	136618314	A	G	0.440358	3.18059e-22	-0.040684854245	0.00419668	VAV2	intergenic
rs3095452	7	76779155	T	C	0.217694	3.38484e-22	0.0421446630971	0.00435011	RP11-467H10.2:CCDC146	ncRNA_intronic
rs6589825	11	120509726	T	C	0.366799	3.94987e-22	0.0341907674225	0.00353488	GRIK4	intronic
rs4705801	5	112515405	C	T	0.298211	4.00059e-22	-0.0390517492622	0.00403798	MCC	intronic
rs661311	5	88034867	C	T	0.219682	4.56899e-22	0.0383777565793	0.00397388	MEF2C	intronic
rs4935101	10	55859477	T	C	0.331014	4.82777e-22	0.0199599292145	0.00206799	PCDH15	intronic
rs487859	1	23801101	C	T	0.09841	4.95712e-22	0.0502569473442	0.00520844	ASAP3	intronic
rs28602535	4	122479906	G	T	0.209742	5.31896e-22	-0.0397867454124	0.00412644	TUBB4BP5	intergenic
rs2783230	13	101083143	C	T	0.269384	5.35354e-22	-0.0346744672909	0.00359647	PCCA	intronic
rs2587848	8	137553766	C	A	0.239563	5.64698e-22	0.00511339194776	0.000530668	RP11-30J20.1	ncRNA_intronic
rs7708822	5	176531995	T	C	0.340954	6.28284e-22	-0.000812433350249	8.44104e-05	FGFR4	intergenic
rs846311	7	42129181	C	G	0.214712	6.63515e-22	-0.0410021394617	0.00426254	GLI3	intronic
rs12443792	16	77450872	T	C	0.176938	7.71024e-22	-0.0345664265807	0.00359927	ADAMTS18	intronic
rs2246097	10	109446464	G	A	0.382704	9.0589e-22	0.0367123456453	0.00382935	RP11-215N21.1	intergenic
rs34804209	1	24716204	T	C	0.10835	9.09723e-22	0.0619116756062	0.0064581	STPG1	intronic
rs12666834	7	155019546	A	C	0.202783	9.25797e-22	-0.057623234335	0.0060119	AC099552.3	intergenic
rs11612273	12	65707858	C	A	0.299205	1.03017e-21	0.0274233580816	0.00286441	MSRB3	intronic
rs4895310	5	120839597	T	C	0.222664	1.13138e-21	-0.00385467423388	0.000403034	RP11-510I6.1	intergenic
rs76290185	2	169221389	T	A	0.147117	1.39431e-21	-0.0363715286996	0.00381153	RN7SL95P	intergenic
rs10109984	8	48803675	C	T	0.416501	1.41897e-21	-0.042086775712	0.0044113	PRKDC	intronic
rs8028162	15	97503301	G	A	0.336978	1.67926e-21	0.0209663029528	0.0022016	RN7SKP181	intergenic
rs11641738	16	88955458	G	A	0.237575	1.83835e-21	-0.046111328095	0.00484679	CBFA2T3	intronic
rs12143036	1	240205133	T	C	0.253479	1.87672e-21	-0.0272470515285	0.0028646	FMN2	intronic
rs9660387	1	44904460	A	G	0.269384	1.94571e-21	-0.0350849632673	0.00369009	RNF220	intronic
rs7192743	16	25296378	C	T	0.22167	2.02096e-21	-0.0396505290609	0.00417201	ZKSCAN2	intergenic
rs11946331	4	60325707	C	G	0.203777	2.1845e-21	0.0383699395222	0.00404071	Y_RNA	intergenic
rs2655310	4	130017919	A	G	0.192843	2.21829e-21	-0.0328692810571	0.00346202	C4orf33	intronic
rs12974061	19	44296006	G	A	0.457256	2.32292e-21	-0.00790172551159	0.000832687	AC115522.3	intergenic
rs9595236	13	45639546	G	A	0.243539	2.32544e-21	-0.0552906608929	0.00582662	RP11-321C24.1	ncRNA_intronic
rs652566	1	201628515	T	C	0.464215	2.33868e-21	0.0394306697542	0.00415553	NAV1	intronic
rs147571544	6	57785141	C	T	0.176938	2.44797e-21	-0.0546248502112	0.00575971	RP11-325M4.2	intergenic
rs1587190	5	18630007	G	A	0.187873	2.4722e-21	-0.0263680259535	0.00278058	CTD-2023M8.1	intergenic
rs78464582	5	97519782	A	T	0.315109	2.52034e-21	0.0287691356992	0.00303442	RP11-274E7.1	intergenic
rs10982367	9	117436258	T	G	0.363817	2.62599e-21	0.034824812569	0.00367481	RP11-402G3.3	intergenic
rs12926983	16	10365617	G	T	0.209742	4.12566e-21	0.0443476384854	0.00470314	RN7SL493P	intergenic
rs976575	9	109649778	G	A	0.352883	4.14098e-21	0.0322085313823	0.00341591	ZNF462	intronic
rs12607312	18	44285649	T	C	0.151093	4.24261e-21	-0.0318348652481	0.00337719	ST8SIA5	intronic
rs62250354	3	57150123	A	T	0.157058	4.60513e-21	0.0378100401083	0.00401473	IL17RD	intronic
rs6658269	1	246426411	G	A	0.144135	5.05745e-21	-0.0300017565473	0.00318897	SMYD3	intronic
rs60232238	12	78217681	C	G	0.250497	5.43461e-21	0.043468589935	0.00462411	NAV3	intergenic
rs1928664	9	29290628	T	C	0.159046	5.54253e-21	-0.012353952055	0.00131448	RP11-373A6.1	intergenic
rs56309753	4	74287684	A	G	0.134195	5.60425e-21	-0.0582097076219	0.00619438	ALB	downstream
rs10846824	12	125573371	T	C	0.412525	5.63205e-21	0.0335453169017	0.00356992	AACS	intronic
rs1524858	7	67729665	G	C	0.220676	5.80783e-21	-0.0212658057749	0.0022639	RP5-945F2.3	ncRNA_intronic
rs35719073	12	130583535	A	G	0.15507	6.18442e-21	0.034924499992	0.00372059	RP11-474D1.2	intergenic
rs4987306	1	169674445	A	C	0.124254	6.89444e-21	-0.0499248103822	0.00532511	C1orf112:SELL	intronic
rs73167634	13	28343233	G	C	0.186879	7.11621e-21	0.0453939913483	0.00484357	GSX1	intergenic
rs10022897	4	47493210	G	C	0.202783	7.14304e-21	0.0478614121136	0.00510706	ATP10D:RP11-731J8.1	ncRNA_exonic
rs4661349	1	16411150	G	A	0.328032	7.22497e-21	-0.0278164717248	0.00296854	FAM131C	intergenic
rs72810563	16	56005605	C	T	0.21173	7.39065e-21	-0.0407473605196	0.00434962	CES5A	intergenic
rs2662791	12	127624151	A	G	0.426441	7.47167e-21	0.0359369108346	0.0038366	RP11-575F12.2	intergenic
rs11783497	8	140643572	T	C	0.0914513	8.2722e-21	-0.00115061575664	0.00012298	KCNK9	intronic
rs6798701	3	38857375	G	A	0.136183	8.58969e-21	-0.0577794191433	0.00617821	RP11-134J21.1	intergenic
rs6470066	8	123182956	G	A	0.293241	9.28049e-21	-0.0412233335484	0.00441177	RP11-398G24.2	intergenic
rs1247348	6	161365436	T	A	0.276342	9.45556e-21	0.0366745301927	0.00392578	RP3-428L16.1	ncRNA_intronic
rs2211639	6	48821000	C	T	0.127237	1.12466e-20	0.0487876530096	0.00523271	AL391538.1	intergenic
rs11871243	17	6166666	G	A	0.252485	1.16698e-20	-0.0379798842837	0.00407524	RNU6-1264P	intergenic
rs4817537	21	34512979	A	G	0.121272	1.32257e-20	0.0565962922922	0.00608145	AP000290.7	intergenic
rs2949951	17	65454414	T	C	0.180915	1.33998e-20	-0.0455712996402	0.00489751	PITPNC1	intronic
rs1409584	13	75087662	C	T	0.158052	1.36416e-20	0.0375726444699	0.00403873	LINC00347	intergenic
rs28555103	16	82725902	T	C	0.147117	1.55177e-20	0.0338674305534	0.00364582	CDH13	intronic
rs2298045	9	131403096	G	A	0.129225	1.72775e-20	-0.0500822655453	0.00539799	WDR34	exonic
rs61986134	14	26531993	C	T	0.185885	1.75223e-20	-0.0421357226078	0.00454223	RP11-314P15.2	ncRNA_intronic
rs7694538	4	60130969	T	C	0.26839	1.78424e-20	0.0354730408273	0.00382479	RP11-622J8.1	intergenic
rs17051371	4	122507292	C	G	0.105368	2.08723e-20	0.0368555376053	0.00398103	ANXA5	intergenic
rs9491960	6	128790787	C	A	0.225646	2.57564e-20	0.0383756524202	0.00415532	PTPRK	intronic
rs6717242	2	68541991	T	A	0.309145	2.65599e-20	0.046742492704	0.00506309	CNRIP1	intronic
rs9322149	6	148732736	G	A	0.282306	2.94956e-20	0.0447791998022	0.00485634	SASH1	intronic
rs79039108	4	165390137	A	G	0.185885	3.20007e-20	0.0287759406195	0.00312373	2025-03-01	intergenic
rs4368156	16	56874272	C	G	0.168986	3.24979e-20	0.0364186148141	0.00395408	NUP93	intronic
rs6100139	20	57195469	T	C	0.264414	3.40782e-20	-0.0429356612256	0.00466424	APCDD1L-AS1	downstream
rs9962473	18	76375492	T	C	0.267396	3.48057e-20	0.047434956656	0.00515429	Y_RNA	intergenic
rs7667718	4	154731642	T	C	0.493042	3.50327e-20	-0.0123759793139	0.00134488	SFRP2	intergenic
rs13065559	3	155127210	A	T	0.188867	3.76765e-20	0.0391299094822	0.0042558	PLCH1	intronic
rs2180454	14	29690513	C	T	0.240557	3.83963e-20	-0.00706490683957	0.000768555	RP11-562L8.1	intergenic
rs7986845	13	61167181	A	G	0.463221	3.84884e-20	0.0217745367701	0.00236881	TDRD3	intergenic
rs2350397	6	154022247	A	C	0.16004	4.11955e-20	0.0348023705319	0.00378909	RNU6-896P	intergenic
rs1496592	4	79479733	C	T	0.200795	4.30027e-20	0.0283269598284	0.00308564	ANXA3	intronic
rs11747137	5	124477591	C	A	0.473161	4.98076e-20	-0.0248453162758	0.00271106	RP11-508M8.1	ncRNA_intronic
rs7030584	9	20045511	C	T	0.406561	5.04383e-20	0.026857636192	0.00293107	RP11-378I6.2	intergenic
rs9478911	6	151323664	G	A	0.224652	5.09888e-20	-0.0412549425504	0.00450288	MTHFD1L	intronic
rs73563232	6	140204611	A	C	0.0745527	6.03574e-20	0.0584804276408	0.00639571	RP5-899B16.2	intergenic
rs37431	5	34923435	C	A	0.245527	6.65088e-20	-0.0092806305699	0.00101614	BRIX1	intronic
rs56019399	7	20646612	A	G	0.161034	7.00216e-20	0.0596321484502	0.00653315	ABCB5	intergenic
rs12143914	1	119203300	T	C	0.145129	7.53283e-20	0.0440982811504	0.00483549	PSMC1P12	intergenic
rs4683818	3	139229619	T	G	0.236581	7.71262e-20	0.0192764487391	0.00211431	RP11-319G6.1	ncRNA_intronic
rs9612459	22	24161912	A	T	0.122266	7.76698e-20	0.0547696378915	0.00600782	SMARCB1	intronic
rs7806322	7	143049965	C	T	0.202783	7.83407e-20	0.0428748085113	0.00470353	FAM131B	downstream
rs116146007	10	37046307	A	G	0.0646123	8.23753e-20	-0.0430740300503	0.00472821	Y_RNA	intergenic
rs10504637	8	77652174	C	T	0.16004	8.39143e-20	0.028560050781	0.00313571	ZFHX4	intronic
rs11922218	3	125631289	T	C	0.167992	8.53479e-20	0.0409318425654	0.00449496	RP11-666A20.4	intergenic
rs4479825	5	73527328	T	G	0.136183	8.53646e-20	-0.0343479131454	0.00377195	AC106732.1	intergenic
rs4427915	19	57651808	T	A	0.305169	9.52339e-20	-0.0442256084345	0.00486303	ZIM3	intronic
rs1490741	9	117032340	A	G	0.248509	9.74192e-20	0.0273509371072	0.00300831	COL27A1	intronic
rs7805466	7	130524369	A	G	0.171968	9.93342e-20	0.0382257460143	0.0042054	AC016831.6	downstream
rs11099673	4	148899082	G	A	0.291252	1.28123e-19	0.0259454071002	0.00286311	ARHGAP10	intronic
rs6458282	6	42486921	A	C	0.407555	1.29559e-19	-0.0318054468358	0.00351025	snoU13	intergenic
rs35771425	1	211609768	C	T	0.205765	1.2977e-19	0.0427034228505	0.00471311	RP11-318L16.6	intergenic
rs117511544	13	21673813	C	G	0.143141	1.30413e-19	0.0456726710417	0.00504112	IPPKP1	intergenic
rs11088946	21	24303762	C	T	0.389662	1.40371e-19	0.027281390658	0.00301385	AP000949.1	intergenic
rs28883992	4	149505835	G	A	0.0964215	1.41494e-19	0.0756320874416	0.00835609	RNA5SP166	intergenic
rs6478239	9	119244954	G	A	0.12326	1.54042e-19	-0.0393476515384	0.00435173	ASTN2	intronic
rs57109420	2	127891356	A	G	0.193837	1.62147e-19	-0.0379564677217	0.00420047	BIN1	intergenic
rs3127602	6	160892241	T	C	0.315109	1.66222e-19	-0.0369750311738	0.00409309	LPAL2	ncRNA_intronic
rs74774788	1	233401203	G	A	0.125249	1.78288e-19	-0.0391113364952	0.00433325	PCNXL2	intronic
rs76469326	16	83423051	C	G	0.134195	2.02477e-19	-0.0452142258491	0.00501716	CDH13:RP11-543N12.1	ncRNA_intronic
rs2184856	1	211649825	C	A	0.163022	2.24481e-19	-0.0435704346755	0.00484083	RD3	downstream
rs9862300	3	177690873	C	T	0.282306	2.29432e-19	0.0279157592689	0.00310237	RP11-2L8.2	intergenic
rs6971770	7	47793492	A	G	0.138171	2.41633e-19	-0.0359517513247	0.00399796	HUS1	intronic
rs10775267	16	20237977	T	C	0.493042	2.51772e-19	-0.021685032883	0.00241267	SNRPEP3	intergenic
rs9923395	16	4427783	C	A	0.222664	2.54507e-19	0.029330517175	0.00326373	CORO7-PAM16:CORO7:VASN	intronic
rs12436817	14	82153095	A	G	0.404573	2.82377e-19	0.0204684085621	0.00228051	RP11-226P1.3	intergenic
rs13015134	2	130599922	T	C	0.253479	2.86816e-19	-0.0192734364385	0.00214778	AC079776.1	intergenic
rs1322494	1	168837734	T	C	0.151093	3.33274e-19	0.0295177887028	0.00329546	SUMO1P2	intergenic
rs1449062	2	226001626	A	C	0.27336	3.43052e-19	0.0273359200736	0.00305295	DOCK10	intergenic
rs1940542	14	88693311	G	A	0.218688	3.50736e-19	-0.0228380987062	0.00255132	KCNK10	intronic
rs6435986	2	218401563	A	G	0.282306	3.64288e-19	0.0163452794763	0.00182684	DIRC3	intergenic
rs2365802	10	127223251	A	G	0.264414	4.08281e-19	-0.0436160969743	0.00488165	TEX36-AS1	intergenic
rs7840407	8	13515935	C	G	0.149105	4.09325e-19	0.0374897129538	0.0041961	RP11-436P7.1	intergenic
rs1111578	12	117913256	T	G	0.156064	4.28327e-19	0.036034493739	0.00403549	KSR2	intronic
rs2600269	3	12033960	T	C	0.151093	4.49705e-19	0.0288628333467	0.00323429	SYN2	intergenic
rs7534238	1	110988988	G	A	0.491054	4.7187e-19	0.0277345913718	0.00310972	PROK1	intergenic
rs11867005	16	53547808	T	G	0.431412	5.32779e-19	0.0161391041751	0.00181232	AKTIP	intergenic
rs6716061	2	123171791	G	A	0.125249	5.58676e-19	0.0525843529219	0.00590838	AC018737.3	intergenic
rs6433693	2	178600801	C	T	0.233598	5.69478e-19	0.0251810334735	0.00283002	PDE11A	intronic
rs11129237	3	26617843	A	G	0.455268	5.93397e-19	-0.0364525053527	0.00409889	AC099754.1	intergenic
rs4946943	6	103736608	T	C	0.086481	8.97522e-19	-0.0797920201714	0.00901891	RP1-76C18.1	intergenic
rs4933564	10	91937734	T	G	0.12326	8.98836e-19	-0.028297474089	0.00319853	RN7SKP143	intergenic
rs5023607	2	35425529	C	T	0.486083	9.61626e-19	0.0314134	0.00355376	AC012593.1	intergenic
rs10131067	14	104142792	G	A	0.308151	1.01534e-18	0.0244819689401	0.00277152	KLC1:RP11-73M18.2	intronic
rs1612404	11	114535229	A	G	0.2167	1.14067e-18	0.00242597895193	0.000275042	NXPE2	intergenic
rs35815683	5	50250792	C	T	0.466203	1.16577e-18	-0.0303140142785	0.00343776	CTD-2089N3.1	intergenic
rs7268250	20	35503182	G	A	0.171968	1.20819e-18	-0.0326344541895	0.00370259	TLDC2	intergenic
rs17297763	20	15237211	C	A	0.161034	1.23961e-18	0.027752292184	0.00314971	MACROD2	intronic
rs73342680	14	95015086	T	C	0.163022	1.29934e-18	-0.036709737268	0.00416882	SERPINA4	intergenic
rs12605	6	99880131	A	G	0.345924	1.36305e-18	-0.017575878697	0.00199716	USP45	downstream
rs73990804	2	215472586	T	C	0.229622	1.37462e-18	-0.0275570244191	0.00313167	AC107218.3	ncRNA_intronic
rs6545893	2	61875233	A	C	0.227634	1.44043e-18	0.0406503309463	0.00462239	RNU6-1145P	intergenic
rs3847606	11	35320769	T	C	0.355865	1.55813e-18	-0.0388948598721	0.00442722	SLC1A2	intronic
rs12701716	7	39331323	T	C	0.475149	1.59042e-18	-0.0248338336765	0.00282746	POU6F2	intronic
rs10974252	9	3947262	A	T	0.411531	1.61231e-18	0.0350235642277	0.00398831	GLIS3	intronic
rs212581	20	54005871	T	G	0.22664	1.7169e-18	-0.0209327468415	0.00238564	RP5-1010E17.2	intergenic
rs2827916	21	24523039	T	G	0.168986	1.7776e-18	0.0303490257766	0.00346032	AP001255.2	intergenic
rs4701151	5	178886655	C	T	0.307157	1.9922e-18	-0.0197451485141	0.0022546	RP11-798K23.1	intergenic
rs139437479	9	86429859	T	C	0.131213	2.11474e-18	0.0536689338728	0.00613289	GKAP1	intronic
rs3019959	8	108015325	A	C	0.210736	2.23088e-18	-0.000700685172529	8.01244e-05	HMGB1P46	intergenic
rs3020093	11	70751980	A	G	0.200795	2.27876e-18	0.0209864378304	0.00240049	SHANK2	intronic
rs6498070	16	10630988	T	C	0.259443	2.5481e-18	0.021701805682	0.00248591	EMP2	intronic
rs9475276	6	13746106	T	C	0.274354	2.64873e-18	-0.0368165940404	0.0042194	RANBP9	intergenic
rs5760782	22	25392832	A	C	0.125249	2.69803e-18	0.024459767712	0.0028039	KIAA1671	intronic
rs12113049	7	96833467	C	T	0.340954	3.03408e-18	0.0208665752282	0.00239566	AC073900.4	intergenic
rs28710773	8	116242756	A	C	0.0864811	3.1407e-18	-0.0663923459517	0.00762582	TRPS1	intergenic
rs10240169	7	145337435	C	T	0.279324	3.37318e-18	0.0217720664574	0.00250307	AC006007.1	intergenic
rs7203274	16	77684529	A	G	0.233598	3.50219e-18	0.0259317097718	0.00298275	RP11-571O6.1	intergenic
rs7145730	14	79245355	C	T	0.194831	4.37142e-18	-0.0242733902153	0.00280012	NRXN3	intronic
rs2578022	10	65845866	G	A	0.16998	4.55532e-18	-0.0425267687037	0.00490845	RP11-174J11.1	intergenic
rs7203113	16	21680493	T	C	0.266402	4.61692e-18	-0.0250102920275	0.0028872	OTOA	intergenic
rs13034492	2	18143091	T	G	0.333996	4.91945e-18	0.0292254401164	0.00337662	KCNS3	intergenic
rs1624041	4	24144642	T	C	0.232604	4.99242e-18	0.0432090899718	0.00499322	PPARGC1A	intergenic
rs10832858	11	1398807	G	A	0.17495	5.74081e-18	0.0531362888711	0.00615174	BRSK2	intergenic
rs3018594	11	98505208	T	C	0.256461	6.31849e-18	-0.0263254798906	0.00305165	RP11-115E19.1	intergenic
rs74647589	12	70463875	C	A	0.173956	6.89146e-18	-0.0379566877799	0.00440502	RP11-611E13.2	ncRNA_intronic
rs2964231	5	151929983	T	C	0.280318	7.23109e-18	0.0283685268538	0.00329438	CTC-550M4.1	intergenic
rs213187	7	52655971	C	G	0.289264	7.4051e-18	-0.0380993604095	0.00442581	snoU13	intergenic
rs10175830	2	25930271	A	G	0.308151	8.80262e-18	0.0378041111011	0.00440166	Y_RNA	intergenic
rs10883035	10	99845573	G	A	0.340954	8.86631e-18	0.0372979657147	0.00434314	R3HCC1L	intergenic
rs10825865	10	58500113	A	G	0.119284	9.11243e-18	-0.0531490752711	0.00619119	SNORD2	intergenic
rs10016993	4	156470555	A	G	0.313121	9.47446e-18	0.0207048506156	0.00241311	RP13-487K5.1	intergenic
rs55691100	4	98213403	C	T	0.0904573	9.73271e-18	0.0848074436509	0.0098877	STPG2	intronic
rs728053	3	144100011	A	G	0.126243	9.81152e-18	0.041424315624	0.00483019	RNA5SP144	intergenic
rs2206461	20	7837676	T	C	0.271372	1.00148e-17	-0.021195190036	0.0024721	RP5-836E8.1	intergenic
rs12740374	1	109817590	T	G	0.212724	1.2932e-17	0.0263813402969	0.0030876	CELSR2	UTR3
rs6532931	4	102305000	T	C	0.280318	1.31261e-17	0.0217249092437	0.00254313	BANK1	intergenic
rs3786709	19	47770507	T	C	0.182903	1.49403e-17	-0.0435899585716	0.00511163	CCDC9	intronic
rs12081092	1	43081293	A	C	0.319085	1.5666e-17	-0.0306207354031	0.00359309	CCDC30	intronic
rs4313952	2	11694251	G	A	0.129225	1.56706e-17	0.0362072259327	0.00424863	GREB1	intronic
rs12420598	11	99755777	T	G	0.313121	1.60317e-17	0.032849127499	0.00385578	CNTN5	intronic
rs12330192	3	75183085	G	T	0.220676	1.62815e-17	-0.0382264357634	0.00448791	NIPA2P2	intergenic
rs73032903	3	13829962	G	C	0.144135	1.64876e-17	0.0490138030834	0.00575536	WNT7A	intergenic
rs78055223	2	241172775	A	C	0.496024	1.69459e-17	0.0139979685913	0.0016443	AC124861.1	ncRNA_intronic
rs7567147	2	31502986	T	C	0.280318	1.74245e-17	0.024379095318	0.00286483	AL121657.4	intergenic
rs2342109	6	58723358	C	T	0.173956	1.75171e-17	-0.0309866813253	0.00364156	RP11-143A22.1	intergenic
rs9637437	3	14850888	T	C	0.451292	1.81166e-17	0.0378407642247	0.00444909	RP11-95M5.1	ncRNA_intronic
rs7654665	4	57923774	T	C	0.0904573	1.81605e-17	-0.0542857296006	0.00638281	IGFBP7	intronic
rs3098265	13	55866991	C	T	0.191849	1.89868e-17	-0.0216870701882	0.00255147	MIR5007	intergenic
rs2561095	5	38259162	G	A	0.0775348	2.01219e-17	0.0307281240441	0.00361802	EGFLAM	intronic
rs34203701	1	53573841	A	G	0.0994036	2.18766e-17	0.0444003662288	0.00523381	SLC1A7	UTR3
rs2341179	8	30100766	G	A	0.0904573	2.24258e-17	-0.0826871319241	0.00975028	HSPA8P11	intergenic
rs4328614	2	35817188	G	A	0.267396	2.32687e-17	0.0314798827132	0.00371392	AC083939.1	intergenic
rs2865135	18	10811275	C	T	0.192843	2.34703e-17	0.0238103129248	0.00280941	PIEZO2	intronic
rs923763	3	148318399	G	T	0.302187	2.39071e-17	0.0429215302188	0.00506566	RPL38P1	intergenic
rs11065987	12	112072424	G	A	0.419483	2.52518e-17	-0.0228251107739	0.00269588	BRAP	intergenic
rs10243433	7	42557883	A	G	0.168986	2.5368e-17	-2.29609554993	0.27121	AC027269.2	intergenic
rs17599975	13	31472977	T	C	0.126243	2.61048e-17	0.0268326471707	0.00317066	TEX26-AS1	ncRNA_intronic
rs34411637	10	26149860	A	G	0.289264	2.69486e-17	0.0333660391493	0.0039444	RNU6-632P	intergenic
rs2465042	6	51106173	A	G	0.214712	2.97171e-17	-0.0337797819836	0.00399871	RP3-437C15.2	intergenic
rs4687607	3	52088651	A	G	0.161034	3.04454e-17	0.0481210073968	0.00569827	DUSP7	intronic
rs79408247	15	40637472	C	G	0.117296	3.07787e-17	-0.0279057513422	0.00330497	C15orf52	intergenic
rs12233703	4	143630177	T	A	0.360835	3.53708e-17	-0.0370615060177	0.00439779	INPP4B	intronic
rs55646513	1	211008308	G	A	0.243539	3.67296e-17	0.0259073149235	0.00307582	KCNH1	intronic
rs9555009	13	104537702	G	A	0.267396	3.91248e-17	-0.0321125029521	0.00381588	ATP6V1G1P7	intergenic
rs67365608	11	98501778	G	T	0.238569	4.7343e-17	0.0375805170651	0.00447754	RP11-115E19.1	intergenic
rs4726187	7	152323122	A	G	0.137177	4.76567e-17	0.0479601767556	0.00571476	SNORA26	intergenic
rs72778418	10	4308241	A	T	0.286282	5.18998e-17	-0.00192104346905	0.000229178	LINC00702	intergenic
rs62457473	7	32306990	A	G	0.102386	5.92021e-17	0.0334563354491	0.0039987	PDE1C	intronic
rs112633029	3	124364803	T	C	0.150099	5.95623e-17	-0.0487898251876	0.00583186	KALRN	intronic
rs576891	1	53364976	G	A	0.367793	6.23895e-17	0.02575085306	0.00308002	ECHDC2	intronic
rs2819458	14	105448337	G	A	0.223658	7.11405e-17	0.0226027925305	0.0027085	AHNAK2	intergenic
rs12588623	14	70817914	T	C	0.162028	8.2013e-17	0.0479864726946	0.00576186	COX16:SYNJ2BP-COX16	ncRNA_intronic
rs10860930	12	103237958	C	A	0.156064	8.9348e-17	-0.04450054376	0.00534981	PAH	intronic
rs11209505	1	70097194	G	A	0.306163	9.6137e-17	-0.0333738975545	0.00401637	LRRC7	intronic
rs7648149	3	45245633	T	C	0.293241	9.68112e-17	-0.0227846182184	0.00274228	TMEM158	intergenic
rs7028602	9	117216819	G	T	0.272366	1.07028e-16	-0.0324483740584	0.00391099	DFNB31	intronic
rs9370465	6	55611011	C	G	0.187873	1.10914e-16	-0.037421971633	0.00451276	BMP5	intergenic
rs1353756	3	192670153	C	T	0.488072	1.14281e-16	0.0196756944405	0.00237373	MB21D2	intergenic
rs9688196	5	67430335	T	C	0.363817	1.19208e-16	0.0294001967026	0.00354908	RNU6-1232P	intergenic
rs13064611	3	196397558	T	C	0.228628	1.21094e-16	-0.0443803625855	0.00535863	PIGX	intronic
rs1511125	4	61441575	G	A	0.229622	1.21248e-16	0.0221976411939	0.00268027	AC095061.1	intergenic
rs7793390	7	78615062	A	C	0.308151	1.36379e-16	-0.0327682198758	0.00396332	MAGI2:MAGI2-IT1	ncRNA_intronic
rs4665382	2	27783801	C	T	0.264414	1.36919e-16	-0.00784257000461	0.000948615	AC109829.1	intronic
rs12512696	4	181747488	G	A	0.291252	1.41686e-16	0.0330861564819	0.00400398	RP11-460H9.1	intergenic
rs6422348	5	177863091	A	G	0.15507	1.43549e-16	-0.0320435713346	0.00387854	COL23A1	intronic
rs11653498	17	52927550	A	G	0.16004	1.50089e-16	0.0255564739948	0.00309534	TOM1L1	intergenic
rs12297083	12	61437876	T	C	0.370775	1.51643e-16	0.0239943642032	0.00290657	RP11-471N19.1	intergenic
rs388955	19	16356606	A	G	0.246521	1.66449e-16	0.0329250858959	0.00399379	AP1M1	intergenic
rs2285210	1	174951278	T	C	0.302187	1.69045e-16	0.0335327961705	0.00406842	RABGAP1L	intronic
rs10774818	12	116009509	C	T	0.217694	1.70844e-16	-0.020469118979	0.00248383	RP11-1028N23.3	ncRNA_intronic
rs934566	2	2874131	G	C	0.393638	1.75153e-16	0.0256521482096	0.00311389	AC011995.3	downstream
rs9506741	13	22415612	T	C	0.159046	1.7896e-16	-0.0240959872865	0.0029259	LINC00424	intergenic
rs10086609	8	91856154	C	G	0.230616	1.86788e-16	0.018336234989	0.0022279	NECAB1:RP11-662G23.1	ncRNA_intronic
rs111845518	11	75294591	C	G	0.084493	2.14541e-16	0.065389184185	0.00796103	CTD-2530H12.4	ncRNA_intronic
rs79161225	5	19324502	T	C	0.154076	2.17252e-16	-0.028360866428	0.00345352	HSPD1P15	intergenic
rs2224797	13	76210742	C	A	0.474155	2.38329e-16	-0.02870310419	0.00349994	RP11-29G8.3:LMO7	ncRNA_intronic
rs2183939	9	90034729	C	T	0.342942	2.49465e-16	0.0290690186898	0.00354693	RP11-497K15.1	intergenic
rs2191808	7	78784184	A	C	0.133201	2.51249e-16	0.0419670668913	0.00512125	MAGI2	intronic
rs35678317	4	137393397	C	G	0.322068	2.53686e-16	-0.0382020403272	0.00466247	RP11-775H9.2	intergenic
rs4957018	5	314011	A	G	0.323062	2.6177e-16	-0.0293184831514	0.0035799	PDCD6:AHRR	intronic
rs9946713	18	39890543	C	T	0.304175	2.78757e-16	-0.0383690780036	0.00468935	LINC00907	ncRNA_intronic
rs74043845	14	35630469	A	C	0.0984095	3.1886e-16	-0.054099087148	0.00662494	KIAA0391:KIAA0391	intronic
rs6041631	20	12791181	T	A	0.17992	3.2221e-16	-0.0353580390398	0.00433059	RP5-1069C8.2	intergenic
rs11872788	18	7410668	A	G	0.225646	3.38197e-16	0.0373186175102	0.004574	SNORA48	intergenic
rs7955145	12	76691017	A	G	0.408549	3.51261e-16	0.0317508515495	0.00389376	RP11-54A9.1	ncRNA_intronic
rs10856781	2	16595843	A	C	0.161034	4.23259e-16	0.0230466229271	0.00283417	AC010880.1	ncRNA_intronic
rs10498688	6	17822774	G	A	0.286282	4.23348e-16	0.0258032818744	0.00317318	KIF13A	intronic
rs1739598	20	60759228	G	C	0.184891	5.44411e-16	-0.0372503989391	0.00459816	MTG2	intronic
rs6429817	1	14314025	A	C	0.250497	5.45866e-16	0.020923985604	0.00258294	RNU6-1265P	intergenic
rs62579976	9	133361191	A	T	0.130219	5.67874e-16	-0.0485656836076	0.00599871	ASS1	intronic
rs72855621	17	79529554	C	G	0.111332	6.14773e-16	-0.0425878334271	0.00526663	NPLOC4	UTR3
rs62539783	9	15213516	C	G	0.126243	7.08534e-16	-0.0428792550357	0.00531405	TTC39B	intronic
rs11195931	10	114125810	A	G	0.0944334	7.09283e-16	0.0449576838155	0.00557172	ACSL5	intergenic
rs62188284	2	183307392	C	A	0.247515	7.41395e-16	0.0368354555947	0.00456817	PDE1A	intronic
rs12959114	18	67062811	A	G	0.290258	7.58474e-16	0.0369170093933	0.00457987	DOK6	intergenic
rs8112768	19	3582603	G	A	0.128231	8.02248e-16	-0.0520787099788	0.00646631	GIPC3	intergenic
rs7701478	5	51826534	G	A	0.122266	8.27695e-16	0.0480328985986	0.00596679	CTD-2141G3.1	intergenic
rs6540674	1	207023321	G	A	0.245527	8.37336e-16	0.0210501392535	0.00261537	IL19	intergenic
rs16886257	5	56062821	G	T	0.0864811	8.90753e-16	-0.0699413949961	0.00869805	AC008940.1	intergenic
rs79933393	3	71843661	C	T	0.171968	9.03056e-16	0.0264056395272	0.00328454	PROK2	intergenic
rs13062453	3	130137866	A	G	0.217694	9.34598e-16	-0.0311892409155	0.0038816	COL6A5	intronic
rs732796	18	55791637	T	C	0.338966	9.45633e-16	0.0276938781573	0.00344721	NEDD4L	intronic
rs9567015	13	43243088	T	C	0.084493	9.72679e-16	-0.0597280542855	0.00743787	TNFSF11	intergenic
rs10786326	10	99070377	A	G	0.366799	9.91045e-16	0.0302867112251	0.00377265	RP11-452K12.3	upstream
rs9626255	22	45253233	G	A	0.258449	1.07391e-15	-0.0176667564014	0.00220336	PRR5-ARHGAP8:ARHGAP8	intronic
rs5757601	22	39671534	T	C	0.184891	1.1166e-15	-0.0315066018822	0.00393178	AL031590.1	intergenic
rs1534097	1	204069958	C	T	0.144135	1.12175e-15	0.0264675826952	0.00330318	SOX13	intronic
rs2049342	7	6527642	T	C	0.166004	1.26008e-15	-0.0377826721674	0.00472376	FLJ20306	intergenic
rs2869722	4	88823621	T	C	0.302187	1.33252e-15	-0.0345261986093	0.00432034	HSP90AB3P	intergenic
rs10808026	7	143099133	A	C	0.222664	1.33668e-15	0.0193616315539	0.00242288	EPHA1	intronic
rs2404693	9	98162994	G	A	0.264414	1.35896e-15	-0.0266634198714	0.00333746	RP11-435O5.7	intergenic
rs1362553	16	52438954	G	C	0.366799	1.42142e-15	-0.0274753119794	0.00344147	TOX3	intergenic
rs720358	6	120737362	T	G	0.223658	1.49506e-15	0.0262237473949	0.00328727	RNU6-214P	intergenic
rs8121099	20	17953062	C	A	0.483101	1.55519e-15	-0.00338650099881	0.000424774	OVOL2:MGME1	intronic
rs1715547	3	102388171	T	A	0.167992	1.58595e-15	0.0292354690352	0.00366816	RP11-280H21.1	ncRNA_intronic
rs619837	6	124786424	C	T	0.307157	1.81547e-15	0.0265395642749	0.00333691	NKAIN2	intronic
rs10934169	3	112049533	A	T	0.164016	1.83531e-15	-0.0390850053467	0.00491512	RP11-90K6.1	ncRNA_intronic
rs1259441	12	31690311	C	A	0.217694	1.86567e-15	-0.0387002641161	0.00486798	DENND5B	intronic
rs56213104	4	27639889	G	A	0.43837	2.02966e-15	-0.0213125584133	0.00268436	IGBP1P5	intergenic
rs6575060	14	89852988	G	A	0.204771	2.07772e-15	0.0336632811324	0.00424152	FOXN3	intronic
rs697253	3	71731077	T	C	0.16501	2.1258e-15	0.0231742290942	0.00292096	EIF4E3	UTR3
rs12142736	1	182491111	C	T	0.210736	2.13794e-15	-0.000975398844846	0.000122954	RGSL1	intronic
rs1661402	6	165589390	G	A	0.234592	2.15255e-15	0.0197172563849	0.00248572	RP11-534P19.1	intergenic
rs226919	6	3704142	A	G	0.445328	2.33423e-15	-0.000771396383476	9.7372e-05	RP1-72E17.2	intergenic
rs885150	9	124420173	C	T	0.218688	2.35547e-15	-0.0192035814462	0.00242438	DAB2IP	intronic
rs903305	3	194833811	C	G	0.296223	2.55122e-15	-0.0320505007903	0.00405133	XXYLT1	intronic
rs9936055	16	83634077	A	G	0.16004	2.58995e-15	-0.0354883092967	0.00448695	CDH13	intronic
rs11781826	8	108192501	G	A	0.153082	2.64627e-15	-0.0193559272827	0.00244809	HMGB1P46	intergenic
rs12471500	2	175021702	C	T	0.148111	2.83588e-15	0.0222122199122	0.00281241	OLA1	intronic
rs12423666	12	62184406	G	A	0.116302	2.86847e-15	0.0398502975355	0.00504658	FAM19A2	intronic
rs12461664	19	9104771	C	G	0.128231	2.97626e-15	-0.0351127314269	0.00444921	MUC16	intergenic
rs55997232	19	11188117	T	C	0.111332	2.98362e-15	0.0324949492018	0.00411767	LDLR	intergenic
rs113997516	3	69127790	G	A	0.175944	3.08843e-15	0.0337237307622	0.00427571	UBA3	intronic
rs2535552	4	58154836	C	T	0.301193	3.22401e-15	0.0222015854355	0.00281678	RPS26P24	intergenic
rs61459653	12	238648	A	G	0.0735586	3.2338e-15	0.040742172526	0.00516932	IQSEC3	intronic
rs10123678	9	94784853	A	G	0.0994036	3.32426e-15	0.0115632485349	0.00146777	HSPE1P22	intergenic
rs733961	8	137059754	G	A	0.466203	3.40066e-15	0.0285825847101	0.00362942	RP11-149P24.1	ncRNA_intronic
rs12744713	1	235538458	G	A	0.105368	3.42575e-15	-0.00756807386599	0.000961107	TBCE	intronic
rs7725650	5	145349733	C	A	0.0974155	3.61702e-15	-0.0433281919752	0.00550721	SH3RF2	intronic
rs9453377	6	66422888	T	A	0.16998	3.80327e-15	-0.0288162148848	0.0036656	EYS	intergenic
rs4845752	1	152226576	A	C	0.167992	3.81044e-15	0.00246564360599	0.000313655	FLG-AS1	ncRNA_intronic
rs3888788	5	133204194	G	A	0.22664	4.33618e-15	0.0344248543186	0.00438823	snoU13	intergenic
rs1475399	1	79210598	G	A	0.145129	4.42431e-15	-0.0340981426082	0.00434799	RP4-641G12.4	intergenic
rs67896405	1	165464103	G	A	0.084493	4.63061e-15	0.0738635708137	0.00942551	RP11-280O1.2	ncRNA_intronic
rs1865069	19	51431159	C	T	0.352883	5.16452e-15	-0.0236906790965	0.0030284	CTB-147C22.3	upstream
rs10498326	14	34469167	A	C	0.274354	5.42158e-15	-0.0296579240565	0.00379416	EGLN3	intronic
rs7147424	14	57634263	G	T	0.150099	5.71313e-15	-0.02503263406	0.00320515	OTX2-AS1	intergenic
rs73615305	20	49225953	G	A	0.465209	6.35382e-15	-0.028296372012	0.00362927	FAM65C	intronic
rs59150787	17	76275982	A	G	0.275348	6.7488e-15	-0.0299382264057	0.00384361	RP11-219G17.4	intergenic
rs798332	7	77908928	T	C	0.384692	7.64524e-15	-0.020846879697	0.00268185	MAGI2	intronic
rs77006743	13	98454717	A	G	0.143141	7.7892e-15	0.0308696747276	0.00397244	snoU13	intergenic
rs116765782	4	188171013	G	A	0.116302	7.81386e-15	0.0465323781517	0.00598829	RP11-308K2.1	intergenic
rs2191784	7	123016941	G	A	0.488072	8.5054e-15	0.0210939719593	0.00271836	IQUB	intergenic
rs6443250	3	9657823	T	C	0.100398	8.71301e-15	-0.0803117382293	0.0103538	DUSP5P2	intergenic
rs1834282	2	34281766	G	A	0.265408	9.28741e-15	0.0288880208603	0.00372814	AC009499.1	ncRNA_intronic
rs4941060	18	59477259	T	A	0.251491	9.66015e-15	0.0228974063793	0.00295693	RNF152	UTR3
rs224064	10	64504212	C	T	0.408549	9.70451e-15	0.0338361102578	0.00436986	ALDH7A1P4	intergenic
rs17592080	1	74674694	A	G	0.0914513	9.99111e-15	0.0592229776388	0.00765217	FPGT:FPGT-TNNI3K:TNNI3K	intronic
rs72795806	10	26335442	A	G	0.218688	9.99558e-15	0.0283774386162	0.00366666	MYO3A	intronic
rs7094797	10	3770014	C	A	0.319085	1.0252e-14	-0.036249414638	0.00468575	RP11-184A2.3	intergenic
rs10471569	5	62363442	A	C	0.192843	1.02659e-14	0.0370576732073	0.00479034	RP11-586E1.1	intergenic
rs140103714	9	82948743	T	C	0.146123	1.02781e-14	-0.0334925597875	0.00432957	NPAP1P4	intergenic
rs16917905	12	9087866	T	A	0.166998	1.06879e-14	-0.00196842656663	0.000254622	PHC1	intronic
rs6065093	20	59918671	A	G	0.166004	1.07139e-14	-0.0256387940738	0.00331658	CDH4	intronic
rs4608344	16	87463483	G	C	0.183897	1.0776e-14	0.0367745425299	0.00475753	ZCCHC14	intronic
rs7041750	9	31898998	G	A	0.185885	1.14038e-14	0.032597316179	0.00422106	HMGB3P23	intergenic
rs9678924	2	15949434	G	T	0.153082	1.23863e-14	0.0447294916378	0.00579999	AC113608.1	ncRNA_intronic
rs7576884	2	154885056	T	C	0.492048	1.33288e-14	0.0299289749556	0.00388555	GALNT13	intronic
rs10996977	10	67970573	T	G	0.131213	1.43855e-14	-0.0356354270007	0.00463226	CTNNA3	intronic
rs1731113	7	144468737	C	G	0.292247	1.49453e-14	0.0359359942955	0.0046743	TPK1	intronic
rs66471623	16	77284710	T	C	0.114314	1.49917e-14	0.0497963883767	0.00647749	RP11-538I12.3:ADAMTS18	ncRNA_intronic
rs16891224	5	62185547	C	T	0.122266	1.63304e-14	-0.0405976999133	0.00528847	ISCA1P1	intergenic
rs16891811	4	15377160	A	G	0.166998	1.96381e-14	-0.0329891476807	0.00431063	RP11-665G4.1:C1QTNF7:RP11-484O2.1	ncRNA_intronic
rs73795164	4	6008151	C	A	0.190855	1.99195e-14	-0.0411761283317	0.00538169	C4orf50	intergenic
rs12445744	16	28588395	C	A	0.317097	2.0916e-14	0.00682696942963	0.000893013	CCDC101	intronic
rs7901548	10	17484620	G	A	0.238569	2.11116e-14	-0.0218157445931	0.00285409	ST8SIA6	intronic
rs10439624	21	42483462	C	T	0.267396	2.27245e-14	-0.0301013952099	0.00394297	LINC00323	intergenic
rs6861121	5	40668727	G	A	0.140159	2.34694e-14	-0.0245504408894	0.00321761	PTGER4	intergenic
rs10421795	19	11344406	T	C	0.144135	2.45917e-14	-0.0287610977886	0.00377244	DOCK6	intronic
rs10507546	13	47483074	A	G	0.235586	2.5729e-14	0.0306466621893	0.00402284	HTR2A	intergenic
rs7302905	12	115244373	T	G	0.202783	2.63666e-14	0.0303197262342	0.00398157	RP4-601P9.1	intergenic
rs1895449	5	90744106	G	A	0.144135	2.67133e-14	-0.0313937010077	0.00412352	RAB5CP2	intergenic
rs34064993	3	176503957	A	G	0.161034	2.69292e-14	0.0427169629174	0.00561158	RP11-644C3.1	ncRNA_intronic
rs75055810	14	91329386	C	T	0.213718	2.72764e-14	-0.0208413596338	0.00273845	RPS6KA5	intergenic
rs874950	4	33299963	T	G	0.196819	2.82946e-14	-0.0329233864976	0.00432867	RP11-638O6.1	intergenic
rs10462357	5	75907770	T	C	0.300199	3.02392e-14	0.0215471277634	0.00283616	IQGAP2	intronic
rs12891696	14	46431023	G	T	0.497018	3.11149e-14	0.016679333064	0.0021965	LINC00871	ncRNA_intronic
rs9700212	1	106184853	A	G	0.280318	3.23074e-14	0.0012017818062	0.000158364	RP11-251P6.1	intergenic
rs11874505	18	7463363	G	A	0.11332	3.59341e-14	-0.0183419465794	0.0024214	PTPRM	intergenic
rs7221291	17	78344343	C	T	0.40159	3.9141e-14	0.0287494446602	0.00380092	RNF213:CTD-2047H16.4	ncRNA_intronic
rs4863516	4	140773770	C	T	0.312127	4.15493e-14	0.0218657021503	0.0028938	MAML3	intronic
rs2251964	1	158582552	A	G	0.276342	4.19554e-14	0.0317295880548	0.00419993	SPTA1	intronic
rs3766180	1	1478153	C	T	0.306163	4.51426e-14	-0.0306339975192	0.00406004	SSU72	intronic
rs58611065	3	166054726	T	C	0.462227	4.5876e-14	-0.02537075067	0.00336342	RP11-12N13.1	intergenic
rs72887731	2	170728329	A	C	0.109344	4.68756e-14	0.00315352368395	0.00041822	UBR3	intronic
rs9985691	4	42858160	C	T	0.114314	4.75902e-14	-0.0357075446349	0.00473678	RN7SKP82	intergenic
rs3857844	7	75274876	G	C	0.222664	5.20023e-14	0.0274613103937	0.00364847	HIP1	intronic
rs10806697	6	159036016	G	A	0.434394	5.24553e-14	-0.0221829529039	0.00294764	TMEM181:TATDN2P2	ncRNA_intronic
rs4694439	4	72756696	A	G	0.243539	6.1438e-14	0.0185709732271	0.00247449	RP11-545L5.1	intergenic
rs8062968	16	65908562	C	T	0.255467	6.262e-14	-0.0212839644172	0.00283692	RP11-513N24.1	intergenic
rs2306536	12	133423662	T	C	0.205765	6.56048e-14	-0.0336903422611	0.00449422	CHFR	exonic
rs4850205	2	132207502	G	A	0.232604	6.69386e-14	-0.0405391753403	0.00540974	AC073869.20	intergenic
rs55985824	9	81412908	T	C	0.133201	7.84919e-14	0.0261576819621	0.00350037	MTND2P8	intergenic
rs2277590	15	101922596	T	A	0.417495	7.94639e-14	0.0311579514751	0.00417041	PCSK6	intronic
rs1713902	4	122302135	T	G	0.26839	8.4873e-14	0.0279518384038	0.00374562	QRFPR	UTR5
rs1158345	21	20645883	T	C	0.347913	9.04708e-14	-0.0294721360874	0.00395381	SLC6A6P1	intergenic
rs55783840	5	21379136	C	T	0.371769	9.34676e-14	-0.020109291956	0.0026993	GUSBP1	ncRNA_intronic
rs11633915	15	66464105	C	T	0.182903	1.04802e-13	0.0282014607448	0.00379322	MEGF11	intronic
rs9550585	13	20299564	A	G	0.131213	1.06364e-13	0.0120635124758	0.00162302	PSPC1	intronic
rs2555739	6	93218349	T	G	0.349901	1.09701e-13	0.01583914355	0.00213217	RP1-149C7.1	intergenic
rs7673616	4	64464892	A	C	0.116302	1.10904e-13	-0.0398932741678	0.00537123	RP11-12K22.1	intergenic
rs6845383	4	127622623	C	T	0.117296	1.14395e-13	-0.0300481377544	0.00404791	RBM48P1	intergenic
rs3910875	10	60726436	T	C	0.285288	1.14859e-13	-0.00243741769075	0.000328379	LINC00844	intergenic
rs75914523	13	38133172	A	G	0.281312	1.15284e-13	0.022568798508	0.00304076	POSTN	intergenic
rs13210804	6	144399703	T	C	0.149105	1.19534e-13	-0.0237441104877	0.00320118	PLAGL1	intergenic
rs61373194	1	247171390	G	C	0.0964215	1.21117e-13	0.0499781525496	0.00673964	ZNF670:ZNF695	UTR5
rs62081815	18	24359641	T	G	0.236581	1.36198e-13	-0.0282947946518	0.00382363	AQP4-AS1	ncRNA_intronic
rs56002748	5	62816596	G	A	0.228628	1.37064e-13	0.0214935940319	0.00290488	CTD-2049O17.1	intergenic
rs11255807	10	8709769	A	T	0.183897	1.40693e-13	0.0309962985658	0.00419114	RNA5SP299	intergenic
rs67567111	20	23619075	T	G	0.224652	1.45375e-13	-0.0324400989682	0.00438894	CST3	UTR5
rs12471618	2	223002513	A	G	0.43837	1.49116e-13	0.0243493415814	0.00329582	PAX3	intergenic
rs7751615	6	138779704	G	A	0.212724	1.67833e-13	0.0305632332626	0.00414574	NHSL1	intronic
rs645798	11	85313065	C	T	0.262425	1.78334e-13	-0.0272770818424	0.00370406	DLG2	intronic
rs10812722	9	28010134	A	G	0.251491	2.07054e-13	0.0179331665654	0.00244183	LINGO2	intronic
rs9855702	3	157240416	C	T	0.151093	2.07686e-13	0.0239019689918	0.00325473	VEPH1	intronic
rs1710885	3	11038807	C	T	0.173956	2.11595e-13	-0.0309667685263	0.00421818	SLC6A1	intronic
rs10971827	9	33972467	A	G	0.132207	2.13335e-13	0.0215074838174	0.00293011	UBAP2	intronic
rs74162636	10	132308426	T	G	0.126243	2.14928e-13	0.0396734503163	0.00540572	Y_RNA	intergenic
rs11984418	7	84534895	T	A	0.248509	2.16934e-13	0.0312421570325	0.00425763	HMGN2P11	intergenic
rs12051571	17	506808	G	A	0.10835	2.1875e-13	-0.0514004799747	0.00700584	VPS53	intronic
rs4275630	11	23379699	T	C	0.463221	2.22549e-13	0.0253991343282	0.00346297	RP11-787P24.4	intergenic
rs71304655	3	167509935	T	C	0.100398	2.28554e-13	0.0388853995932	0.00530429	SERPINI1	intronic
rs6045079	20	17891945	C	T	0.498012	2.28921e-13	0.0200324215324	0.00273267	RNU6-192P	intergenic
rs2011535	14	75833195	T	A	0.272366	2.31235e-13	0.023949961369	0.00326767	RP11-293M10.6	intergenic
rs9814185	3	36737608	G	A	0.212724	2.35376e-13	0.0304236964901	0.00415228	RN7SKP227	intergenic
rs194894	6	82423281	A	C	0.16501	2.36233e-13	0.0110787234112	0.00151214	FAM46A	intronic
rs7126629	11	2228952	A	C	0.181909	2.40598e-13	0.0258683016493	0.00353197	MIR4686	intergenic
rs10831788	11	12349076	T	G	0.185885	2.4265e-13	0.032088117062	0.00438188	MICALCL	intronic
rs6729375	2	71617644	A	G	0.126243	2.4606e-13	0.0340702665554	0.00465375	ZNF638	intronic
rs1863004	7	135053638	T	C	0.276342	2.49915e-13	-0.0229117924608	0.00313047	CNOT4	intronic
rs970262	7	8747718	A	G	0.347913	2.53822e-13	-0.0335895112886	0.00459069	NXPH1	intronic
rs6496658	15	90884105	G	A	0.305169	2.56273e-13	0.0199467643884	0.00272661	GABARAPL3	intergenic
rs56269360	3	21833636	T	G	0.193837	2.57998e-13	-0.0402117435549	0.0054974	ZNF385D	intergenic
rs9453273	6	66071475	G	C	0.350895	2.59842e-13	-0.0338587149234	0.00462948	EYS	intronic
rs13029968	2	38935110	A	G	0.0685885	2.63228e-13	-0.00155993297225	0.000213339	GALM	intronic
rs12496811	3	55429617	T	C	0.225646	2.63937e-13	-0.0312829453132	0.00427852	RP11-875H7.2	intergenic
rs75915717	15	34498314	T	C	0.0994036	2.93151e-13	0.0615534289965	0.00843486	KATNBL1	intronic
rs8021645	14	86040455	A	G	0.126243	2.96688e-13	-0.00873158011905	0.00119678	FLRT2	intronic
rs72844631	6	3413851	C	T	0.0954274	2.98074e-13	-0.066063647975	0.00905569	SLC22A23	intronic
rs2404210	1	53603796	A	G	0.258449	2.9978e-13	0.0166902176348	0.00228806	SLC1A7	intronic
rs112685216	16	74609517	A	G	0.190855	3.08882e-13	0.0226736921765	0.00311005	GLG1	intronic
rs7895723	10	57179890	T	C	0.227634	3.11329e-13	0.0237330313874	0.00325583	PCDH15:RP11-168O22.1	ncRNA_intronic
rs934849	18	76249104	G	T	0.296223	3.18949e-13	0.0213815997201	0.00293456	RP11-451L19.1	intergenic
rs12623907	2	79672431	C	T	0.304175	3.218e-13	-0.0235961253206	0.00323903	CTNNA2	intronic
rs1993498	12	10798615	A	G	0.362823	3.29967e-13	-0.0276016551078	0.00379062	STYK1	intronic
rs4715315	6	52625891	A	G	0.418489	3.4052e-13	0.018813178901	0.00258518	GSTA2	intronic
rs13400649	2	42051279	A	G	0.124254	3.40664e-13	0.0393131454311	0.00540219	LDHAP3	intergenic
rs9536936	13	33842309	A	G	0.262425	3.41075e-13	0.0184278293897	0.0025323	STARD13	intronic
rs10193011	2	7059932	T	C	0.363817	3.65039e-13	0.00196328568105	0.00027013	RNF144A	intronic
rs6532318	4	92475543	T	A	0.367793	3.91765e-13	-0.0212968982613	0.00293411	CCSER1	intronic
rs58268955	7	142781782	T	A	0.0805169	4.04753e-13	-0.044546523684	0.00614099	OR6W1P	intergenic
rs848904	7	78990258	C	G	0.40159	4.0964e-13	0.0140133318361	0.00193225	MAGI2	intronic
rs11987217	8	16864548	T	C	0.157058	4.10298e-13	-0.0317450708809	0.00437735	FGF20	intergenic
rs17819384	15	56437774	T	C	0.230616	4.16653e-13	-0.0193276352023	0.00266587	RFX7	intronic
rs4972255	2	126862762	G	A	0.264414	4.45952e-13	-0.0184966165151	0.00255449	AC114813.1	intergenic
rs16836691	1	238473459	G	A	0.296223	4.82728e-13	-0.0329295706915	0.00455453	RNU6-725P	intergenic
rs2673565	8	133466344	G	A	0.310139	4.91255e-13	0.0255734464779	0.00353826	KCNQ3	intronic
rs2322117	13	35162269	A	G	0.199801	5.47326e-13	-0.0390015112416	0.00540711	RP11-16D22.2:LINC00457:RP11-266E6.3	ncRNA_intronic
rs7071884	10	125594966	T	C	0.105368	5.47632e-13	0.0554159952846	0.00768288	CPXM2	intronic
rs73197538	12	106747592	G	A	0.0874751	5.51846e-13	-0.0271845546074	0.00376941	POLR3B	intergenic
rs4592115	9	25649187	G	A	0.22664	6.01481e-13	0.035951963247	0.00499323	TUSC1	intergenic
rs17288338	19	46856421	A	G	0.302187	6.07727e-13	-0.0188900973025	0.00262408	PPP5C	intronic
rs11212992	11	109096368	C	T	0.0745527	6.08398e-13	0.0863143533196	0.0119905	SNORD39	intergenic
rs1373	14	100808510	A	T	0.235586	6.30655e-13	-0.0252722748896	0.00351312	WARS:RP11-638I2.8	ncRNA_intronic
rs10801279	1	193996875	A	G	0.209742	6.78261e-13	-0.028526227829	0.00397094	RP11-563D10.1	intergenic
rs4908696	1	6074434	G	A	0.172962	7.12417e-13	-0.0184373519932	0.00256894	KCNAB2	intronic
rs1424773	2	108017810	A	T	0.28827	7.23147e-13	-0.0278911890899	0.00388728	AC096669.1:AC096669.2	ncRNA_intronic
rs10117812	9	128251025	G	C	0.302187	7.34873e-13	0.025754133334	0.00359053	MAPKAP1	intronic
rs2060274	19	19543271	T	C	0.16998	7.59366e-13	-0.0391083569337	0.00545574	GATAD2A	intronic
rs1532687	5	73013115	T	C	0.213718	7.69085e-13	0.0284068453823	0.00396381	ARHGEF28	intronic
rs262210	3	68391629	T	G	0.493042	8.03213e-13	0.0220968906438	0.0030859	FAM19A1	intronic
rs62275743	3	168366300	T	C	0.163022	8.12525e-13	0.0444592507767	0.00621024	EGFEM1P	ncRNA_intronic
rs1978715	19	39379031	G	C	0.122266	8.21196e-13	-0.0425067271129	0.00593871	SIRT2	intronic
rs59324732	2	35723951	T	C	0.162028	8.28994e-13	0.0255337430515	0.00356802	AC083939.1	intergenic
rs61839890	1	223610139	T	A	0.272366	9.08052e-13	0.0184014654205	0.00257588	C1orf65	intergenic
rs1515887	16	27062009	A	C	0.220676	9.14604e-13	-0.0247577611975	0.00346612	C16orf82	intergenic
rs10172994	2	240938682	A	G	0.299205	9.30218e-13	-0.0192138674246	0.00269085	NDUFA10	intronic
rs2092954	20	51016925	C	T	0.365805	9.41663e-13	0.0275003998572	0.00385226	RP4-723E3.1	ncRNA_intronic
rs7601636	2	6908137	A	G	0.150099	9.44598e-13	0.0409006234958	0.0057297	LINC00487	ncRNA_intronic
rs10818117	9	120921427	G	A	0.248509	9.47364e-13	-0.0298422283285	0.00418079	TPT1P9	intergenic
rs4555369	2	77849209	C	T	0.210736	1.01024e-12	-0.0291849386836	0.00409377	LRRTM4	intergenic
rs11086753	20	38079606	G	A	0.475149	1.01244e-12	0.0207648672265	0.00291281	RN7SL194P	intergenic
rs2823807	21	17817462	T	C	0.267396	1.06704e-12	-0.0201329606172	0.00282704	LINC00478	ncRNA_intronic
rs746564	1	30509199	G	A	0.321074	1.06783e-12	-0.0233917488783	0.00328468	RP11-111I12.1	ncRNA_intronic
rs12046213	1	29513323	A	G	0.0874751	1.06888e-12	0.0472318765284	0.00663245	SRSF4	intergenic
rs4854785	3	133717948	T	C	0.230616	1.12819e-12	0.0332416908698	0.00467279	SLCO2A1	intronic
rs9921177	16	72336481	G	C	0.196819	1.19103e-12	0.0177236716087	0.00249404	RP11-328J14.2	intergenic
rs286982	12	42002600	G	C	0.129225	1.2156e-12	-0.025127272759	0.00353727	PDZRN4	intergenic
rs10847135	12	126870208	T	C	0.222664	1.22419e-12	0.0228883938669	0.00322253	RP5-944M2.1	intergenic
rs2628658	14	87706364	G	A	0.314115	1.28432e-12	0.0268328158043	0.00378141	RP11-1141N12.1	intergenic
rs685633	7	4187807	C	G	0.305169	1.291e-12	0.0278142606739	0.00392011	SDK1	intronic
rs2023936	7	19039067	G	C	0.21173	1.30461e-12	-0.0196735492188	0.00277334	HDAC9	UTR3
rs1946545	2	56036435	G	A	0.207753	1.33162e-12	-0.00406730133143	0.000573588	EFEMP1	intergenic
rs6961195	7	1423177	G	C	0.399602	1.37586e-12	0.0214137222715	0.00302178	MICALL2	intergenic
rs7897481	10	110901642	T	C	0.178926	1.42654e-12	-0.0413733673164	0.0058425	RNU5B-6P	intergenic
rs1948095	11	98747015	A	C	0.128231	1.49394e-12	0.041243510408	0.00582943	RP11-99C10.1	intergenic
rs2065730	1	75414744	A	C	0.189861	1.50781e-12	0.0329708821613	0.00466101	RP11-93N20.1	intergenic
rs8122090	20	7573831	C	G	0.144135	1.53042e-12	0.0239754162685	0.00339033	RN7SL547P	intergenic
rs16911478	12	16150512	A	G	0.0745527	1.63837e-12	-0.0135025598638	0.00191194	DERA	intronic
rs17819626	4	2304095	G	A	0.132207	1.76815e-12	-0.0128594841325	0.00182361	ZFYVE28:RP11-478C1.7	ncRNA_intronic
rs3088147	21	46792372	A	G	0.301193	1.798e-12	0.0249636277795	0.00354128	MTCO1P3	intergenic
rs134583	22	29465677	T	C	0.491054	1.91704e-12	0.00111333595785	0.000158136	KREMEN1	intergenic
rs11692744	2	77868088	A	C	0.168986	2.03642e-12	-0.0421430671271	0.00599307	AC084149.2	intergenic
rs1906432	15	53877705	G	C	0.144135	2.03897e-12	0.037451020048	0.00532596	WDR72	intronic
rs12663441	6	11171163	T	C	0.151093	2.33182e-12	-0.0248394409564	0.00354189	RP3-510L9.1	intergenic
rs11188395	10	97365622	C	G	0.16501	2.33426e-12	-0.0386450818584	0.00551057	ALDH18A1	downstream
rs4650292	1	69479427	A	G	0.269384	2.39876e-12	0.000808752075407	0.000115386	RP11-424D14.1	intergenic
rs4647880	17	74532081	T	C	0.199801	2.42286e-12	-0.0337729222979	0.00481941	CYGB:PRCD	intronic
rs2594013	12	32298216	T	G	0.158052	2.50479e-12	-0.024988706759	0.00356827	BICD1	intronic
rs3746257	19	35500470	A	G	0.0874751	2.56711e-12	0.0257114893823	0.00367328	GRAMD1A	intronic
rs11622938	14	22651353	T	A	0.192843	2.60416e-12	0.0275314988501	0.00393443	TRAV32	intergenic
rs1990010	7	30844750	C	A	0.415507	2.83808e-12	0.0247611235341	0.00354464	INMT-FAM188B:FAM188B	intronic
rs6798998	3	181513216	G	T	0.306163	2.85291e-12	-0.0245491703424	0.00351466	SOX2-OT	ncRNA_intronic
rs8085115	18	348265	C	T	0.228628	3.07077e-12	-0.000519819248755	7.4532e-05	COLEC12	intronic
rs10933810	3	104933158	T	C	0.218688	3.07326e-12	-0.0122243039089	0.00175276	ALCAM	intergenic
rs4560285	3	12809066	A	G	0.327038	3.143e-12	-0.0245156610387	0.00351672	TMEM40	intronic
rs10187791	2	189168052	T	C	0.166004	3.40015e-12	-0.0325608906434	0.00467822	GULP1	intronic
rs2545452	8	140560986	C	T	0.304175	3.4933e-12	-0.0152378767485	0.00219052	KCNK9	intergenic
rs7211948	17	20081257	A	G	0.170974	3.63075e-12	-0.0141394878351	0.00203421	SPECC1	intronic
rs481026	7	16651415	C	A	0.168986	3.72389e-12	0.0316189617324	0.00455127	ANKMY2	intronic
rs2906850	12	68344212	C	T	0.471173	3.72859e-12	-0.0138278526796	0.00199045	GS1-410F4.4	ncRNA_intronic
rs6981055	8	58113941	C	T	0.167992	3.743e-12	-0.0256871540931	0.00369782	RP11-513O17.2	ncRNA_intronic
rs13146670	4	47737103	T	C	0.0864811	4.02295e-12	0.0469973465645	0.00677549	CORIN	intronic
rs34972605	11	1721982	G	A	0.12326	4.04353e-12	-0.0295429148959	0.00425957	KRTAP5-6	intergenic
rs6140144	20	752132	G	A	0.101392	4.1607e-12	0.0547937384549	0.0079049	SLC52A3	intergenic
rs539360	11	59839682	A	C	0.271372	4.18473e-12	-0.0257608718349	0.00371687	MS4A3	intergenic
rs1660281	18	62542694	C	T	0.112326	4.18732e-12	0.0305065668297	0.00440165	AC007948.1	intergenic
rs59414734	11	116347944	C	T	0.0974155	4.53106e-12	-0.0394992089168	0.00570836	AP001891.1	intergenic
rs10270190	7	57875304	A	G	0.287276	4.53753e-12	-0.0194932797153	0.00281722	RP11-548K12.3	intergenic
rs73113144	20	25585215	T	C	0.0914513	4.62767e-12	0.0484456598071	0.00700431	RNU6ATAC17P	intergenic
rs56825645	2	47787079	G	C	0.27336	4.70305e-12	-0.0239214224843	0.00345972	MSH2:KCNK12	intronic
rs2824350	21	18922931	G	A	0.207753	4.91236e-12	0.0258654102932	0.00374422	CXADR	intronic
Notes: Adjust the p-values of the correlation test (P<5×10^-16, P<5×10^-12) to analyze the novel SNP sites that can be identified at different levels [1].
Abbreviations: SNP Single Nucleotide Polymorphism, CHR Chromosome, BP Base Pair, EAF Effect Allele Frequency, SE Standard Error
References
1. Park, S, et al. Multivariate genomic analysis of 5 million people elucidates the genetic architecture of shared components of the metabolic syndrome. Nat. Genet. 2024; 56 (11): 2380-2391

## Sheet: Supplementatry Table 5
Supplementary Table 5. Genomic risk loci identified by FUMA in the multivariate CKM syndrome (mvCKM)
Genomic risk loci identified by FUMA
GenomicLocus	rsID	CHR	POS	p	start	end	nSNPs	nGWASSNPs	nIndSigSNPs	IndSigSNPs	nLeadSNPs	LeadSNPs
1	rs111739932	1	797325	9.93913e-197	732809	809876	25	1	1	rs111739932	1	rs111739932
2	rs3766180	1	1478153	4.51426e-14	1474167	1511315	26	2	1	rs3766180	1	rs3766180
3	rs61277936	1	2390715	1.44078e-11	2370683	2399921	3	1	1	rs61277936	1	rs61277936
4	rs4478781	1	4086827	5.70936e-51	3817538	4105435	24	3	3	rs35329253;rs7526903;rs4478781	3	rs35329253;rs7526903;rs4478781
5	rs989310	1	4771695	5.9623e-66	4771695	4771695	1	1	1	rs989310	1	rs989310
6	rs7547299	1	5025243	6.75089e-77	5025243	5126411	6	3	2	rs7547299;rs7525854	2	rs7547299;rs7525854
7	rs4908696	1	6074434	7.12417e-13	5899314	6119805	23	16	2	rs36010087;rs4908696	2	rs36010087;rs4908696
8	rs12402363	1	11921243	1.46748e-169	11912243	11932425	5	1	1	rs12402363	1	rs12402363
9	rs6429817	1	14314025	5.45866e-16	14298761	14324593	7	1	1	rs6429817	1	rs6429817
10	rs10927478	1	14969869	3.83737e-23	14949421	14996147	13	1	1	rs10927478	1	rs10927478
11	rs12563699	1	15553395	4.17016e-31	15542514	15555615	13	1	1	rs12563699	1	rs12563699
12	rs1980607	1	15975237	1e-200	15817318	16047072	107	1	1	rs1980607	1	rs1980607
13	rs4661349	1	16411150	7.22497e-21	16411150	16411788	2	1	1	rs4661349	1	rs4661349
14	rs7516087	1	17393889	4.19612e-59	17378188	17414063	22	2	1	rs7516087	1	rs7516087
15	rs4920636	1	18098709	1.62769e-08	18087216	18107732	15	1	1	rs4920636	1	rs4920636
16	rs733813	1	18907484	2.58924e-65	18905422	18934415	7	1	1	rs733813	1	rs733813
17	rs6426613	1	20480668	6.00452e-59	20479930	20480668	2	1	1	rs6426613	1	rs6426613
18	rs10916814	1	20892931	6.36621e-81	20892931	21537562	93	25	2	rs10916814;rs11577267	2	rs10916814;rs11577267
19	rs829412	1	21953436	5.72799e-82	21945869	21975055	6	1	1	rs829412	1	rs829412
20	rs209729	1	22835677	1.33436e-26	22792895	22849696	5	1	1	rs209729	1	rs209729
21	rs487859	1	23801101	4.95712e-22	23754028	23823798	13	1	1	rs487859	1	rs487859
22	rs34804209	1	24716204	9.09723e-22	24677391	24754789	13	1	1	rs34804209	1	rs34804209
23	rs298442	1	26301699	6.46138e-184	26282101	26349109	9	2	1	rs298442	1	rs298442
24	rs35874489	1	27412149	3.38793e-08	27405997	27537565	29	1	1	rs35874489	1	rs35874489
25	rs12046213	1	29513323	1.06888e-12	29223337	29581937	25	2	2	rs471099;rs12046213	2	rs471099;rs12046213
26	rs746564	1	30509199	1.06783e-12	30468691	30509713	13	1	1	rs746564	1	rs746564
27	rs3766296	1	31820223	2.53894e-28	31707298	32013688	80	3	3	rs3766296;rs6690908;rs4448564	2	rs3766296;rs4448564
28	rs1418483	1	34997944	1.39515e-55	34899796	35038275	11	2	2	rs80067291;rs1418483	2	rs80067291;rs1418483
29	rs4653185	1	36861854	5.73363e-23	36860165	36900170	20	1	1	rs4653185	1	rs4653185
30	rs112215807	1	40384298	4.72796e-23	40377622	40384298	2	1	1	rs112215807	1	rs112215807
31	rs2744799	1	41185534	1.86641e-60	41103166	41238913	26	1	1	rs2744799	1	rs2744799
32	rs12071990	1	41902954	2.20474e-32	41902954	41906182	2	1	1	rs12071990	1	rs12071990
33	rs12718444	1	43409179	1e-200	43076078	43421956	24	2	2	rs12081092;rs12718444	2	rs12081092;rs12718444
34	rs9660387	1	44904460	1.94571e-21	44902098	44934588	7	1	1	rs9660387	1	rs9660387
35	rs111699884	1	46814329	4.47997e-39	46670206	46864653	74	2	1	rs111699884	1	rs111699884
36	rs11211428	1	47517591	7.33958e-12	47491794	47637659	120	1	1	rs11211428	1	rs11211428
37	rs34203701	1	53573841	2.18766e-17	53190362	53619845	97	3	3	rs576891;rs34203701;rs2404210	3	rs576891;rs34203701;rs2404210
38	rs11206197	1	54165831	5.69008e-12	54129613	54193701	48	30	1	rs11206197	1	rs11206197
39	rs12564882	1	54794930	6.51856e-44	54790330	54802434	16	11	1	rs12564882	1	rs12564882
40	rs72669957	1	55156195	4.20313e-63	55153546	55156768	5	1	1	rs72669957	1	rs72669957
41	rs10888935	1	56060951	1.98426e-27	56060951	56063193	2	1	1	rs10888935	1	rs10888935
42	rs17114046	1	56966350	7.25451e-99	56912610	57004417	7	2	1	rs17114046	1	rs17114046
43	rs6668521	1	57270371	3.03989e-11	57261311	57272452	4	1	1	rs6668521	1	rs6668521
44	rs12744510	1	59113961	1.14498e-10	59105387	59195759	11	1	1	rs12744510	1	rs12744510
45	rs645936	1	60571334	2.5318e-10	60530303	60589454	4	1	1	rs645936	1	rs645936
46	rs1779868	1	61476048	5.73212e-10	61189435	61495779	42	19	2	rs34668815;rs1779868	2	rs34668815;rs1779868
47	rs4650292	1	69479427	2.39876e-12	69456948	69479641	3	1	1	rs4650292	1	rs4650292
48	rs11209505	1	70097194	9.6137e-17	70007663	70111153	32	25	1	rs11209505	1	rs11209505
49	rs17131332	1	70994595	1.75286e-61	70994595	70994595	1	1	1	rs17131332	1	rs17131332
50	rs1830201	1	71786220	1.00596e-11	71527111	71786220	14	2	1	rs1830201	1	rs1830201
51	rs17592080	1	74674694	9.99111e-15	74531153	74700284	10	1	1	rs17592080	1	rs17592080
52	rs4949841	1	75765593	1.90974e-52	75327797	75808230	55	2	2	rs2065730;rs4949841	2	rs2065730;rs4949841
53	rs1159214	1	76317910	4.293e-39	76098022	76459873	84	1	1	rs1159214	1	rs1159214
54	rs4300269	1	76751466	2.51974e-08	76747128	76760776	11	1	1	rs4300269	1	rs4300269
55	rs1357331	1	77348936	4.05653e-133	77348936	77543953	25	2	2	rs1357331;rs11162255	2	rs1357331;rs11162255
56	rs17414106	1	79438696	6.0056e-178	79192228	79459448	15	2	2	rs1475399;rs17414106	2	rs1475399;rs17414106
57	rs1338144	1	81321698	3.24235e-172	81254738	81327085	7	2	1	rs1338144	1	rs1338144
58	rs10874249	1	81946553	1.71773e-39	81946553	81946553	1	1	1	rs10874249	1	rs10874249
59	rs942682	1	85346891	1.68123e-26	85346891	85346891	1	1	1	rs942682	1	rs942682
60	rs10493766	1	85945660	1.62352e-84	85887768	85945660	8	2	2	rs17127710;rs10493766	2	rs17127710;rs10493766
61	rs72712401	1	88142950	1.06392e-39	87980226	88142950	4	2	2	rs6576905;rs72712401	2	rs6576905;rs72712401
62	rs282057	1	91821503	2.8781e-76	91677600	91853265	18	1	1	rs282057	1	rs282057
63	rs4247165	1	92832179	1.91456e-100	92665389	93033928	87	18	1	rs4247165	1	rs4247165
64	rs859107	1	95315420	3.50884e-33	95315420	95319438	2	1	1	rs859107	1	rs859107
65	rs7534454	1	99800965	5.23416e-26	99800965	99800965	1	1	1	rs7534454	1	rs7534454
66	rs1764447	1	100570806	3.07136e-11	100445607	100703978	34	1	1	rs1764447	1	rs1764447
67	rs6577215	1	101387780	2.94015e-09	101375526	101513896	20	2	1	rs6577215	1	rs6577215
68	rs4908204	1	102431521	2.63299e-25	102424391	102584981	28	8	1	rs4908204	1	rs4908204
69	rs61814746	1	104337413	3.74725e-11	104108280	104337413	7	1	1	rs61814746	1	rs61814746
70	rs1404028	1	106077515	4.57919e-36	106014368	106184853	25	2	2	rs1404028;rs9700212	2	rs1404028;rs9700212
71	rs6604120	1	109289487	2.04036e-50	109278409	109364464	40	1	1	rs6604120	1	rs6604120
72	rs12740374	1	109817590	1.2932e-17	109814880	109818158	4	2	2	rs12740374;rs4970834	1	rs12740374
73	rs7525906	1	110319838	1.03539e-97	110305246	110324223	10	1	1	rs7525906	1	rs7525906
74	rs7534238	1	110988988	4.7187e-19	110962918	110989088	4	3	1	rs7534238	1	rs7534238
75	rs4839078	1	111405037	3.41429e-50	111391381	111409872	21	1	1	rs4839078	1	rs4839078
76	rs2182114	1	111784227	1.5783e-10	111772259	111791503	15	1	1	rs2182114	1	rs2182114
77	rs11588345	1	113583087	3.66782e-73	113424101	113640553	47	1	1	rs11588345	1	rs11588345
78	rs12143914	1	119203300	7.53283e-20	119203300	119203300	1	1	1	rs12143914	1	rs12143914
79	rs347904	1	120177620	1.93938e-39	120099137	120192300	7	2	2	rs34291690;rs347904	2	rs34291690;rs347904
80	rs55963049	1	146579535	7.51612e-94	146551521	146833745	198	1	1	rs55963049	1	rs55963049
81	rs41310873	1	152659805	9.80254e-149	152159961	152707779	281	83	2	rs4845752;rs41310873	2	rs4845752;rs41310873
82	rs1171558	1	156452093	2.31776e-125	156432628	156455314	3	1	1	rs1171558	1	rs1171558
83	rs9426952	1	157302349	4.73472e-10	157278189	157317697	27	1	1	rs9426952	1	rs9426952
84	rs2251964	1	158582552	4.19554e-14	158441462	158894110	107	3	2	rs2251964;rs2518534	2	rs2251964;rs2518534
85	rs6697596	1	160496993	6.03902e-10	160482519	160591997	21	1	1	rs6697596	1	rs6697596
86	rs12565565	1	163482240	5.70074e-72	163478115	163491271	19	1	1	rs12565565	1	rs12565565
87	rs67896405	1	165464103	4.63061e-15	165463546	165464103	2	1	1	rs67896405	1	rs67896405
88	rs6667673	1	166777148	2.36547e-48	166720402	166793151	5	1	1	rs6667673	1	rs6667673
89	rs1322494	1	168837734	3.33274e-19	168745900	168854733	5	1	1	rs1322494	1	rs1322494
90	rs4987306	1	169674445	6.89444e-21	169671337	169884081	30	1	1	rs4987306	1	rs4987306
91	rs2294740	1	170928671	9.85899e-78	170726606	170928671	32	2	2	rs10919489;rs2294740	2	rs10919489;rs2294740
92	rs6695502	1	171773176	7.56839e-105	171734714	171773176	9	1	1	rs6695502	1	rs6695502
93	rs2285210	1	174951278	1.69045e-16	174951278	175200846	8	2	2	rs2285210;rs6658036	2	rs2285210;rs6658036
94	rs10798464	1	176572091	4.01218e-54	176565595	176684432	66	49	1	rs10798464	1	rs10798464
95	rs1458848	1	181226694	2.78709e-40	181192577	181261846	26	1	1	rs1458848	1	rs1458848
96	rs12142736	1	182491111	2.13794e-15	182436439	182527189	6	1	1	rs12142736	1	rs12142736
97	rs12129062	1	188117353	8.25797e-138	187903994	188203645	10	1	1	rs12129062	1	rs12129062
98	rs4354505	1	188620733	2.73051e-113	188617404	188621083	5	5	1	rs4354505	1	rs4354505
99	rs521702	1	189634377	1.59212e-29	189553022	189750507	97	1	1	rs521702	1	rs521702
100	rs4614260	1	191044104	2.20757e-134	190886930	191091588	33	1	1	rs4614260	1	rs4614260
101	rs1416493	1	192231987	6.84107e-42	192174155	192308346	13	1	1	rs1416493	1	rs1416493
102	rs10921305	1	193001474	1.04739e-82	193001474	193355250	58	4	1	rs10921305	1	rs10921305
103	rs10801279	1	193996875	6.78261e-13	193944841	194000015	13	1	1	rs10801279	1	rs10801279
104	rs680941	1	195166715	7.78014e-62	195166715	195199840	2	1	1	rs680941	1	rs680941
105	rs77965414	1	196144327	5.65872e-12	196041605	196169114	26	1	1	rs77965414	1	rs77965414
106	rs12061508	1	196584468	4.9492e-36	196491356	196917899	55	1	1	rs12061508	1	rs12061508
107	rs1539413	1	197733942	1.17761e-11	197315402	197822172	297	229	1	rs1539413	1	rs1539413
108	rs12136367	1	199247142	4.48033e-08	199246716	199254794	3	1	1	rs12136367	1	rs12136367
109	rs16848007	1	201158340	1.16806e-23	201158340	201169059	2	1	1	rs16848007	1	rs16848007
110	rs652566	1	201628515	2.33868e-21	201611822	201628515	3	1	1	rs652566	1	rs652566
111	rs61822682	1	202924395	1.56004e-11	202924395	202934765	3	1	1	rs61822682	1	rs61822682
112	rs7554814	1	203643164	9.35979e-64	203643053	203643164	2	1	1	rs7554814	1	rs7554814
113	rs1534097	1	204069958	1.12175e-15	204054802	204069958	3	1	1	rs1534097	1	rs1534097
114	rs17014035	1	206841857	2.64664e-69	206841857	207040659	15	4	2	rs17014035;rs6540674	2	rs17014035;rs6540674
115	rs11119284	1	209641089	1.76083e-82	209634354	209944408	74	17	2	rs11119284;rs12030655	2	rs11119284;rs12030655
116	rs72745499	1	210609292	2.55722e-10	210608707	210622622	9	1	1	rs72745499	1	rs72745499
117	rs55646513	1	211008308	3.67296e-17	211006816	211008308	2	1	1	rs55646513	1	rs55646513
118	rs11119753	1	211676720	7.4879e-60	211377218	211681728	46	6	3	rs35771425;rs2184856;rs11119753	3	rs35771425;rs2184856;rs11119753
119	rs17721302	1	212435062	3.57757e-43	212292090	212585092	35	2	2	rs4951568;rs17721302	2	rs4951568;rs17721302
120	rs7553890	1	214005905	7.99923e-63	213994572	214005905	4	1	1	rs7553890	1	rs7553890
121	rs11120330	1	214638645	2.68919e-09	214610109	214643170	22	1	1	rs11120330	1	rs11120330
122	rs11117777	1	217325016	3.05941e-50	217321018	217346952	6	1	1	rs11117777	1	rs11117777
123	rs4523580	1	217764772	3.85919e-98	217744854	217764772	7	1	1	rs4523580	1	rs4523580
124	rs572796	1	218294727	1.72639e-33	218199203	218294896	17	3	2	rs572796;rs6661310	1	rs572796
125	rs61824476	1	218711782	6.40454e-12	218711782	218711782	1	1	1	rs61824476	1	rs61824476
126	rs2647455	1	220207810	6.47597e-66	219932558	220223314	64	2	2	rs113535874;rs2647455	2	rs113535874;rs2647455
127	rs34064794	1	221458189	1.59886e-44	221447608	221545371	9	1	1	rs34064794	1	rs34064794
128	rs17461309	1	222551394	1.1638e-34	222527404	222938997	31	4	3	rs17461309;rs35806535;rs3002145	2	rs17461309;rs35806535
129	rs61839890	1	223610139	9.08052e-13	223610139	223627766	28	1	1	rs61839890	1	rs61839890
130	rs7550648	1	224707177	6.99101e-37	224656022	224708176	17	2	1	rs7550648	1	rs7550648
131	rs17518706	1	226632413	4.42148e-40	226632413	226673287	3	1	1	rs17518706	1	rs17518706
132	rs12745292	1	229093925	2.18314e-08	229077710	229093925	3	1	1	rs12745292	1	rs12745292
133	rs17761459	1	230409562	3.61226e-10	230386622	230409562	2	1	1	rs17761459	1	rs17761459
134	rs12699	1	230973407	7.05098e-57	230944083	230973407	5	1	1	rs12699	1	rs12699
135	rs7517457	1	231965989	8.49195e-117	231888085	231968670	10	3	2	rs17748992;rs7517457	2	rs17748992;rs7517457
136	rs74774788	1	233401203	1.78288e-19	233398918	233421424	21	1	1	rs74774788	1	rs74774788
137	rs12041160	1	234420229	3.06387e-46	234420229	234421883	2	1	1	rs12041160	1	rs12041160
138	rs12744713	1	235538458	3.42575e-15	235534049	235633032	23	1	1	rs12744713	1	rs12744713
139	rs2451602	1	238168345	6.83981e-57	238110366	238475435	48	4	3	rs2451602;rs4659829;rs16836691	3	rs2451602;rs4659829;rs16836691
140	rs2174076	1	238837866	1.13913e-51	238821539	238844015	5	1	1	rs2174076	1	rs2174076
141	rs10925799	1	239207623	9.58436e-117	239171701	239217224	16	1	1	rs10925799	1	rs10925799
142	rs34584779	1	239619387	1.60108e-08	239619387	239622187	3	1	1	rs34584779	1	rs34584779
143	rs12143036	1	240205133	1.87672e-21	240184896	240208499	23	1	1	rs12143036	1	rs12143036
144	rs9661172	1	241007710	1.40872e-40	240890859	241007710	5	2	2	rs12064514;rs9661172	2	rs12064514;rs9661172
145	rs6658006	1	242080555	3.90215e-72	241853353	242080555	6	2	2	rs76507089;rs6658006	2	rs76507089;rs6658006
146	rs2809887	1	242989393	1.7603e-10	242984500	242991053	4	1	1	rs2809887	1	rs2809887
147	rs426182	1	243775450	4.88372e-58	243663604	243985769	30	2	2	rs7523102;rs426182	2	rs7523102;rs426182
148	rs685637	1	245163416	4.54434e-43	245129972	245361785	27	2	2	rs685637;rs4658447	2	rs685637;rs4658447
149	rs6658269	1	246426411	5.05745e-21	246358912	246478968	123	1	1	rs6658269	1	rs6658269
150	rs61373194	1	247171390	1.21117e-13	247152862	247256601	19	1	1	rs61373194	1	rs61373194
151	rs28667587	1	248566400	3.31829e-56	248418159	248820514	112	1	1	rs28667587	1	rs28667587
152	rs4327261	2	1050007	4.45332e-55	1049867	1055058	20	1	1	rs4327261	1	rs4327261
153	rs12470060	2	2198307	1e-200	2167313	2223432	30	1	1	rs12470060	1	rs12470060
154	rs934566	2	2874131	1.75153e-16	2860430	2876990	10	1	1	rs934566	1	rs934566
155	rs4546036	2	3303096	4.26509e-24	3290341	3310062	8	1	1	rs4546036	1	rs4546036
156	rs35114997	2	4110598	3.4082e-108	4107029	4127706	12	1	1	rs35114997	1	rs35114997
157	rs62118168	2	4497693	6.2485e-90	4495025	4537825	12	1	1	rs62118168	1	rs62118168
158	rs12477389	2	4849033	4.87932e-27	4830290	4945087	22	1	1	rs12477389	1	rs12477389
159	rs10193011	2	7059932	3.65039e-13	6908137	7075768	7	3	2	rs7601636;rs10193011	2	rs7601636;rs10193011
160	rs16866472	2	7967373	5.46412e-23	7963627	7988436	14	14	1	rs16866472	1	rs16866472
161	rs62129922	2	10313375	2.29952e-59	10313260	10323437	19	13	1	rs62129922	1	rs62129922
162	rs60925909	2	10894859	1e-200	10885484	10902271	9	1	1	rs60925909	1	rs60925909
163	rs4313952	2	11694251	1.56706e-17	11694056	11694251	2	1	1	rs4313952	1	rs4313952
164	rs2705843	2	14875245	8.12879e-24	14803113	14926160	44	21	1	rs2705843	1	rs2705843
165	rs9678924	2	15949434	1.23863e-14	15949434	15950665	2	1	1	rs9678924	1	rs9678924
166	rs10856781	2	16595843	4.23259e-16	16595659	16605174	7	1	1	rs10856781	1	rs10856781
167	rs35468724	2	17394636	3.16489e-23	17371784	17551554	23	1	1	rs35468724	1	rs35468724
168	rs13034492	2	18143091	4.91945e-18	18128023	18146617	6	1	1	rs13034492	1	rs13034492
169	rs16985346	2	18807786	3.22218e-11	18802313	18824634	7	1	1	rs16985346	1	rs16985346
170	rs62110772	2	19909572	1.24586e-08	19909070	19914521	8	1	1	rs62110772	1	rs62110772
171	rs11687600	2	22886365	1e-200	22628339	22886365	6	2	2	rs1396731;rs11687600	2	rs1396731;rs11687600
172	rs72789910	2	24388609	8.20603e-50	24366829	25037626	70	2	2	rs72789910;rs11684913	2	rs72789910;rs11684913
173	rs10175830	2	25930271	8.80262e-18	25917017	26094369	41	3	2	rs10175830;rs10200754	2	rs10175830;rs10200754
174	rs4665382	2	27783801	1.36919e-16	27755825	27872312	14	1	1	rs4665382	1	rs4665382
175	rs6715256	2	28723942	1.6152e-104	28723942	28723942	1	1	1	rs6715256	1	rs6715256
176	rs62139520	2	31109970	8.14326e-189	30641970	31203853	65	5	4	rs895665;rs958580;rs62139520;rs62139556	3	rs895665;rs62139520;rs62139556
177	rs10187719	2	31600146	1.69437e-27	31499532	31600146	17	2	2	rs7567147;rs10187719	2	rs7567147;rs10187719
178	rs34666266	2	32926832	4.04883e-31	32873922	32945501	7	1	1	rs34666266	1	rs34666266
179	rs219147	2	33212979	1.62915e-11	33212979	33212979	1	1	1	rs219147	1	rs219147
180	rs1834282	2	34281766	9.28741e-15	34281766	34281766	1	1	1	rs1834282	1	rs1834282
181	rs75670636	2	35307874	3.39684e-40	35262498	35846558	142	5	5	rs75670636;rs12618906;rs5023607;rs59324732;rs4328614	5	rs75670636;rs12618906;rs5023607;rs59324732;rs4328614
182	rs10181215	2	36397384	2.28194e-09	36397384	36410564	11	1	1	rs10181215	1	rs10181215
183	rs2021870	2	36708041	6.3066e-25	36708041	36730576	2	1	1	rs2021870	1	rs2021870
184	rs62133078	2	37226299	3.27345e-37	37059557	37264935	22	3	1	rs62133078	1	rs62133078
185	rs13029968	2	38935110	2.63228e-13	38906498	38935873	9	1	1	rs13029968	1	rs13029968
186	rs2373702	2	40084166	1.07386e-50	40082236	40094251	5	1	1	rs2373702	1	rs2373702
187	rs735868	2	42272389	2.8886e-46	42009128	42275044	62	3	3	rs10198047;rs13400649;rs735868	3	rs10198047;rs13400649;rs735868
188	rs2166499	2	43169289	2.97551e-45	43160601	43173297	7	1	1	rs2166499	1	rs2166499
189	rs6737964	2	44226195	2.01901e-57	44207723	44234332	8	1	1	rs6737964	1	rs6737964
190	rs7602661	2	45506205	3.97388e-63	45502565	45511172	4	1	1	rs7602661	1	rs7602661
191	rs35128922	2	46033907	2.58732e-51	46025906	46033907	3	1	1	rs35128922	1	rs35128922
192	rs10172245	2	47245581	3.2427e-08	47243343	47245581	4	1	1	rs10172245	1	rs10172245
193	rs56825645	2	47787079	4.70305e-12	47787079	47787079	1	1	1	rs56825645	1	rs56825645
194	rs12713037	2	49366956	3.70571e-08	49353994	49382725	10	1	1	rs12713037	1	rs12713037
195	rs10207605	2	52286399	2.80267e-41	52253309	52306422	49	2	1	rs10207605	1	rs10207605
196	rs1168239	2	52957508	7.67339e-42	52942203	53012971	7	2	1	rs1168239	1	rs1168239
197	rs62138589	2	53532141	7.97349e-35	53413683	53542968	21	3	2	rs1424987;rs62138589	2	rs1424987;rs62138589
198	rs11891739	2	55662803	5.33646e-23	55553133	55662803	31	1	1	rs11891739	1	rs11891739
199	rs1946545	2	56036435	1.33162e-12	55989737	56115468	28	1	1	rs1946545	1	rs1946545
200	rs6545893	2	61875233	1.44043e-18	61393756	61875233	32	2	2	rs7559099;rs6545893	2	rs7559099;rs6545893
201	rs262528	2	63903367	1e-200	63426408	63913711	94	2	1	rs262528	1	rs262528
202	rs6723426	2	64983495	3.22081e-35	64905182	65004346	47	36	1	rs6723426	1	rs6723426
203	rs7596231	2	66040362	1e-200	66008421	66054046	15	1	1	rs7596231	1	rs7596231
204	rs7603889	2	67288938	7.17884e-11	67272855	67312097	11	1	1	rs7603889	1	rs7603889
205	rs6546364	2	68475068	7.067e-50	68166150	68661514	91	32	4	rs1503244;rs6546364;rs6717242;rs7563924	4	rs1503244;rs6546364;rs6717242;rs7563924
206	rs10210718	2	70966323	7.21665e-51	70637692	70995963	30	3	3	rs6749533;rs7605323;rs10210718	3	rs6749533;rs7605323;rs10210718
207	rs6729375	2	71617644	2.4606e-13	71386177	71688079	54	1	1	rs6729375	1	rs6729375
208	rs688433	2	72690622	3.01141e-66	72524933	73115997	105	44	1	rs688433	1	rs688433
209	rs7574795	2	76200225	3.50281e-190	76197658	76235745	14	3	2	rs7574795;rs73936889	1	rs7574795
210	rs4555369	2	77849209	1.01024e-12	77840978	77873409	18	3	2	rs4555369;rs11692744	2	rs4555369;rs11692744
211	rs12612949	2	78623415	2.14786e-49	78539322	78761472	68	1	1	rs12612949	1	rs12612949
212	rs12993353	2	79941636	4.6612e-128	79635500	79967956	47	2	2	rs12623907;rs12993353	2	rs12623907;rs12993353
213	rs3100108	2	84029777	3.57907e-45	83891993	84057966	152	78	1	rs3100108	1	rs3100108
214	rs1563895	2	84817714	2.41385e-38	84559527	84990245	404	2	1	rs1563895	1	rs1563895
215	rs55746113	2	86032424	1e-200	86031360	86058108	6	2	1	rs55746113	1	rs55746113
216	rs6722086	2	87111715	3.94839e-08	87068609	87142056	28	1	1	rs6722086	1	rs6722086
217	rs35738525	2	97147587	5.37869e-54	97147587	97149664	2	1	1	rs35738525	1	rs35738525
218	rs6721361	2	102159888	2.43771e-99	102152983	102177233	6	1	1	rs6721361	1	rs6721361
219	rs72995626	2	103162580	1e-200	103032189	103189194	12	1	1	rs72995626	1	rs72995626
220	rs73946422	2	104991726	4.23276e-80	104978827	105015350	10	1	1	rs73946422	1	rs73946422
221	rs7589732	2	105809102	2.05443e-59	105809102	105819989	3	1	1	rs7589732	1	rs7589732
222	rs80086271	2	106667037	1.49488e-29	106648971	106669523	7	1	1	rs80086271	1	rs80086271
223	rs1424773	2	108017810	7.23147e-13	108017810	108156202	48	1	1	rs1424773	1	rs1424773
224	rs2271701	2	112731173	2.45981e-10	112656063	112817916	27	1	1	rs2271701	1	rs2271701
225	rs1402449	2	116146175	1e-200	115965781	116292433	31	1	1	rs1402449	1	rs1402449
226	rs60488711	2	116854998	3.45931e-09	116776895	116879562	29	1	1	rs60488711	1	rs60488711
227	rs204863	2	118561727	6.55607e-58	118501813	118869891	32	2	2	rs1974913;rs204863	2	rs1974913;rs204863
228	rs1992131	2	121125289	2.39309e-53	121125289	121135140	3	2	1	rs1992131	1	rs1992131
229	rs6716061	2	123171791	5.58676e-19	123171791	123171791	1	1	1	rs6716061	1	rs6716061
230	rs113665621	2	123749438	7.24009e-12	123568578	123769293	31	1	1	rs113665621	1	rs113665621
231	rs4972255	2	126862762	4.45952e-13	126770928	126867936	10	1	1	rs4972255	1	rs4972255
232	rs57109420	2	127891356	1.62147e-19	127839534	127894758	31	13	1	rs57109420	1	rs57109420
233	rs80147256	2	128986764	1.86862e-27	128840881	129003123	53	16	1	rs80147256	1	rs80147256
234	rs7562504	2	130462267	6.16362e-114	130461368	130599922	8	2	2	rs7562504;rs13015134	2	rs7562504;rs13015134
235	rs4850205	2	132207502	6.69386e-14	132177810	132289071	261	1	1	rs4850205	1	rs4850205
236	rs62166635	2	134854023	2.1985e-32	134854023	135095431	18	2	2	rs62166635;rs62167966	2	rs62166635;rs62167966
237	rs10189863	2	136849515	2.54892e-09	136828746	136849515	8	1	1	rs10189863	1	rs10189863
238	rs4954359	2	137475955	3.10162e-31	137447296	137565177	9	1	1	rs4954359	1	rs4954359
239	rs11885193	2	139080891	2.25661e-60	139080891	139099364	5	1	1	rs11885193	1	rs11885193
240	rs1085461	2	145581451	1.65095e-22	145483993	145602444	29	7	1	rs1085461	1	rs1085461
241	rs13010506	2	147728038	9.31251e-33	147728038	147728038	1	1	1	rs13010506	1	rs13010506
242	rs13016400	2	148563890	1.2534e-104	148243073	148952186	41	2	2	rs7580064;rs13016400	2	rs7580064;rs13016400
243	rs179322	2	150010847	1.24457e-51	149976839	150073949	18	1	1	rs179322	1	rs179322
244	rs1618828	2	150613638	1.89627e-11	150605922	150619977	13	2	1	rs1618828	1	rs1618828
245	rs6759742	2	154041418	1e-200	154024082	154157823	45	2	2	rs6759742;rs74687290	2	rs6759742;rs74687290
246	rs7576884	2	154885056	1.33288e-14	154736051	155028484	10	1	1	rs7576884	1	rs7576884
247	rs12618763	2	156382106	1.30128e-08	156138437	156447290	65	1	1	rs12618763	1	rs12618763
248	rs62176719	2	160817963	3.65521e-31	160422288	160856174	95	4	2	rs6745448;rs62176719	2	rs6745448;rs62176719
249	rs355914	2	165656787	1.12301e-50	165575431	165900578	30	4	4	rs355914;rs6738671;rs10803794;rs62174577	2	rs355914;rs6738671
250	rs13016383	2	167378139	7.15684e-30	167377146	167719276	58	2	2	rs13016383;rs16852735	2	rs13016383;rs16852735
251	rs76290185	2	169221389	1.39431e-21	169197279	169221389	10	1	1	rs76290185	1	rs76290185
252	rs72887731	2	170728329	4.68756e-14	170692507	170969040	41	11	1	rs72887731	1	rs72887731
253	rs13023417	2	172221512	3.92627e-63	172174151	172517494	27	2	2	rs13023417;rs144604835	2	rs13023417;rs144604835
254	rs6730323	2	173047982	1.20217e-11	173047982	173074802	49	1	1	rs6730323	1	rs6730323
255	rs12471500	2	175021702	2.83588e-15	174939187	175162005	20	1	1	rs12471500	1	rs12471500
256	rs1864451	2	175455623	5.14027e-12	175449631	175460001	5	1	1	rs1864451	1	rs1864451
257	rs7584020	2	176311539	6.8748e-95	176284251	176397804	28	1	1	rs7584020	1	rs7584020
258	rs7563608	2	177927010	1.11518e-76	177895828	177933215	25	10	1	rs7563608	1	rs7563608
259	rs10497482	2	178805428	1e-200	178565129	179146621	38	3	3	rs6433693;rs10497482;rs17592042	3	rs6433693;rs10497482;rs17592042
260	rs10497523	2	179652802	1.81329e-10	179647962	179652802	2	1	1	rs10497523	1	rs10497523
261	rs1480707	2	180709478	8.2024e-29	180676928	180736148	7	1	1	rs1480707	1	rs1480707
262	rs721301	2	181387265	1.31935e-88	181387265	181459749	8	1	1	rs721301	1	rs721301
263	rs72883559	2	181866610	2.42238e-80	181836727	182027840	75	1	1	rs72883559	1	rs72883559
264	rs35828806	2	183355241	4.56134e-37	183251369	183381780	45	3	3	rs62188284;rs35828806;rs1594304	2	rs62188284;rs35828806
265	rs1377755	2	184553811	7.57408e-41	184545493	184580593	5	1	1	rs1377755	1	rs1377755
266	rs72910264	2	186497268	7.50788e-43	186278968	186880238	40	3	1	rs72910264	1	rs72910264
267	rs62179646	2	189123590	1.57035e-151	188900863	189357376	92	3	2	rs62179646;rs10187791	2	rs62179646;rs10187791
268	rs7608839	2	191498404	2.33615e-11	191487147	191498404	2	1	1	rs7608839	1	rs7608839
269	rs41332844	2	192277371	2.42155e-23	192277371	192277371	1	1	1	rs41332844	1	rs41332844
270	rs1446409	2	193164089	9.77396e-51	193120208	193227487	36	1	1	rs1446409	1	rs1446409
271	rs3937566	2	199057114	1.28322e-08	199057114	199085268	13	1	1	rs3937566	1	rs3937566
272	rs78680879	2	201649113	1.64287e-129	201622972	201712824	12	1	1	rs78680879	1	rs78680879
273	rs7571667	2	207808509	5.50452e-31	207580310	207896469	22	3	3	rs10932161;rs7571667;rs6720359	3	rs10932161;rs7571667;rs6720359
274	rs73990804	2	215472586	1.37462e-18	215472586	215499261	4	1	1	rs73990804	1	rs73990804
275	rs1112651	2	216497739	1e-200	216497739	216616377	11	2	2	rs1112651;rs1011145	2	rs1112651;rs1011145
276	rs1179686	2	217750818	1e-200	217718416	217768641	10	1	1	rs1179686	1	rs1179686
277	rs6435986	2	218401563	3.64288e-19	218401563	218429530	18	1	1	rs6435986	1	rs6435986
278	rs1876832	2	221638280	5.11585e-93	221638280	221638280	1	1	1	rs1876832	1	rs1876832
279	rs12471618	2	223002513	1.49116e-13	222997597	223073020	15	1	1	rs12471618	1	rs12471618
280	rs1448301	2	224046610	3.73344e-124	224032386	224087899	12	1	1	rs1448301	1	rs1448301
281	rs1449062	2	226001626	3.43052e-19	225991060	226001626	2	1	1	rs1449062	1	rs1449062
282	rs13033648	2	228310965	5.47021e-10	228240690	228583924	54	2	2	rs13033648;rs7605058	2	rs13033648;rs7605058
283	rs2021751	2	230013153	4.54875e-66	229986963	230033996	22	2	2	rs2021751;rs1419959	1	rs2021751
284	rs2290130	2	232263127	1e-200	232252196	232292899	15	1	1	rs2290130	1	rs2290130
285	rs11902035	2	233386432	8.05406e-26	233386432	233386432	1	1	1	rs11902035	1	rs11902035
286	rs13005673	2	233961160	1.15261e-52	233961160	233961160	1	1	1	rs13005673	1	rs13005673
287	rs2675139	2	236672715	3.03987e-64	236420394	236731624	51	3	2	rs1554232;rs2675139	2	rs1554232;rs2675139
288	rs7598644	2	238187069	3.66382e-47	238187069	238188026	2	1	1	rs7598644	1	rs7598644
289	rs113574176	2	238540704	4.83939e-43	238513300	238575265	14	1	1	rs113574176	1	rs113574176
290	rs876571	2	239032652	5.14317e-60	239020840	239035239	13	1	1	rs876571	1	rs876571
291	rs9711993	2	239684289	3.50984e-170	239646494	239703307	9	1	1	rs9711993	1	rs9711993
292	rs78055223	2	241172775	1.69459e-17	240908852	241172775	8	2	2	rs10172994;rs78055223	2	rs10172994;rs78055223
293	rs3846145	3	3307984	2.12587e-08	3296052	3310614	9	1	1	rs3846145	1	rs3846145
294	rs3804861	3	7675665	2.07223e-09	7624336	7685757	5	1	1	rs3804861	1	rs3804861
295	rs7653602	3	8597771	1.05572e-44	8592413	8884320	56	16	2	rs7653602;rs55779238	2	rs7653602;rs55779238
296	rs11131164	3	9319740	5.99418e-117	9319121	9340242	17	1	1	rs11131164	1	rs11131164
297	rs6443250	3	9657823	8.71301e-15	9657823	9668982	2	1	1	rs6443250	1	rs6443250
298	rs1710885	3	11038807	2.11595e-13	11038807	11038807	1	1	1	rs1710885	1	rs1710885
299	rs2600269	3	12033960	4.49705e-19	12029463	12210355	26	1	1	rs2600269	1	rs2600269
300	rs4560285	3	12809066	3.143e-12	12803104	12853720	32	1	1	rs4560285	1	rs4560285
301	rs73032903	3	13829962	1.64876e-17	13829962	13829962	1	1	1	rs73032903	1	rs73032903
302	rs9637437	3	14850888	1.81166e-17	14850888	14906734	7	3	2	rs9637437;rs2131570	2	rs9637437;rs2131570
303	rs9824191	3	17453982	3.13189e-26	17262455	17852607	4	1	1	rs9824191	1	rs9824191
304	rs7430675	3	18875039	4.5897e-61	18832508	18875039	5	1	1	rs7430675	1	rs7430675
305	rs13079950	3	21321236	6.17904e-133	21321236	21498230	8	2	2	rs13079950;rs400737	2	rs13079950;rs400737
306	rs56269360	3	21833636	2.57998e-13	21811399	21855191	11	1	1	rs56269360	1	rs56269360
307	rs17013706	3	23787191	1e-200	23244943	23797415	75	26	2	rs11712582;rs17013706	2	rs11712582;rs17013706
308	rs1511536	3	24104259	4.14961e-11	24099204	24160464	18	1	1	rs1511536	1	rs1511536
309	rs34112261	3	25203618	1.78614e-111	25057622	25600761	31	4	4	rs1846555;rs34112261;rs6794839;rs75722923	4	rs1846555;rs34112261;rs6794839;rs75722923
310	rs11129237	3	26617843	5.93397e-19	26614179	26634593	4	1	1	rs11129237	1	rs11129237
311	rs6777272	3	27488310	1.5914e-150	27301087	27549350	44	4	1	rs6777272	1	rs6777272
312	rs4680766	3	28653629	7.20489e-34	28653629	28664435	4	1	1	rs4680766	1	rs4680766
313	rs7645960	3	29874266	5.35303e-32	29842820	29874805	31	1	1	rs7645960	1	rs7645960
314	rs4234265	3	33847935	5.47881e-23	33839731	33910703	23	1	1	rs4234265	1	rs4234265
315	rs12163625	3	34918504	9.11827e-162	34916877	34947371	8	1	1	rs12163625	1	rs12163625
316	rs9814185	3	36737608	2.35376e-13	36717791	36737608	7	1	1	rs9814185	1	rs9814185
317	rs6798701	3	38857375	8.58969e-21	38835084	38860108	6	1	1	rs6798701	1	rs6798701
318	rs6804418	3	39791526	1.56408e-08	39745982	39796972	22	1	1	rs6804418	1	rs6804418
319	rs147480110	3	42020393	3.40799e-128	41749669	42040170	226	2	1	rs147480110	1	rs147480110
320	rs55799024	3	42762291	1.77307e-50	42762291	42851899	20	1	1	rs55799024	1	rs55799024
321	rs1565208	3	44233507	2.84217e-25	44222162	44374293	25	1	1	rs1565208	1	rs1565208
322	rs7648149	3	45245633	9.68112e-17	45238122	45251128	11	1	1	rs7648149	1	rs7648149
323	rs61565453	3	45946576	1e-200	45946576	45946576	1	1	1	rs61565453	1	rs61565453
324	rs13083665	3	46681373	2.95029e-25	46660423	46695646	5	1	1	rs13083665	1	rs13083665
325	rs4687607	3	52088651	3.04454e-17	52088651	52197441	5	1	1	rs4687607	1	rs4687607
326	rs12496811	3	55429617	2.63937e-13	55385597	55463118	22	1	1	rs12496811	1	rs12496811
327	rs62250354	3	57150123	4.60513e-21	57092234	57150123	8	1	1	rs62250354	1	rs62250354
328	rs17061493	3	59920186	1.21379e-35	59917989	59920186	2	1	1	rs17061493	1	rs17061493
329	rs2594264	3	60514736	5.73106e-12	60514736	60553037	4	1	1	rs2594264	1	rs2594264
330	rs79373538	3	61249760	1.84909e-27	61188383	61264888	29	1	1	rs79373538	1	rs79373538
331	rs11708502	3	61835333	1e-200	61835333	61882620	2	1	1	rs11708502	1	rs11708502
332	rs13075027	3	66301274	1.33887e-28	66286831	66342125	10	1	1	rs13075027	1	rs13075027
333	rs262210	3	68391629	8.03213e-13	68378364	68476807	12	1	1	rs262210	1	rs262210
334	rs113997516	3	69127790	3.08843e-15	69068356	69140847	11	2	2	rs7631719;rs113997516	2	rs7631719;rs113997516
335	rs62252961	3	69703507	1.34813e-74	69703507	69727701	5	1	1	rs62252961	1	rs62252961
336	rs35652087	3	71928235	1e-200	71725896	71928235	11	3	3	rs697253;rs79933393;rs35652087	3	rs697253;rs79933393;rs35652087
337	rs12495044	3	73725020	8.23729e-179	73626561	73783128	20	4	3	rs12495044;rs12635639;rs143488310	2	rs12495044;rs143488310
338	rs6764494	3	74506398	3.41338e-75	74477610	74520021	13	1	1	rs6764494	1	rs6764494
339	rs12330192	3	75183085	1.62815e-17	74903164	75311230	151	2	1	rs12330192	1	rs12330192
340	rs1447791	3	76625087	5.96808e-10	76597787	76720280	17	2	2	rs1447791;rs2121788	2	rs1447791;rs2121788
341	rs11927752	3	78192962	2.63067e-35	78106668	78209709	23	1	1	rs11927752	1	rs11927752
342	rs11925970	3	78751148	1.5795e-77	78692803	78808539	107	73	1	rs11925970	1	rs11925970
343	rs13071539	3	90430912	3.6556e-09	90383411	90493882	26	1	1	rs13071539	1	rs13071539
344	rs9809636	3	94074585	5.72033e-40	94058007	94116295	14	1	1	rs9809636	1	rs9809636
345	rs35789423	3	95832430	1.89739e-10	95530980	95836716	56	1	1	rs35789423	1	rs35789423
346	rs7631623	3	96381472	4.19367e-140	96331804	96417145	105	1	1	rs7631623	1	rs7631623
347	rs1531729	3	99075918	4.94536e-36	99047293	99141483	50	14	1	rs1531729	1	rs1531729
348	rs1715547	3	102388171	1.58595e-15	102374783	102608943	67	2	1	rs1715547	1	rs1715547
349	rs4894971	3	103718693	1e-200	103708798	103742596	6	1	1	rs4894971	1	rs4894971
350	rs13099357	3	105000469	2.38199e-26	104881759	105000469	98	72	2	rs10933810;rs13099357	2	rs10933810;rs13099357
351	rs62263014	3	105319187	3.60906e-09	105314720	105319187	2	1	1	rs62263014	1	rs62263014
352	rs7639774	3	107816216	3.12882e-52	107816216	107816216	1	1	1	rs7639774	1	rs7639774
353	rs10934169	3	112049533	1.83531e-15	112023865	112097401	14	1	1	rs10934169	1	rs10934169
354	rs62266411	3	116922925	2.00386e-35	116922925	117008483	8	2	2	rs62266411;rs4855940	2	rs62266411;rs4855940
355	rs4676818	3	120392504	1.7949e-83	120392354	120393397	4	1	1	rs4676818	1	rs4676818
356	rs34049878	3	121948686	8.31984e-09	121845538	121948686	15	1	1	rs34049878	1	rs34049878
357	rs2063516	3	122435729	1.12688e-32	122435729	122453952	3	1	1	rs2063516	1	rs2063516
358	rs4677905	3	123524834	3.71377e-99	123524339	123657014	25	2	2	rs4677905;rs2682207	1	rs4677905
359	rs112633029	3	124364803	5.95623e-17	124357601	124365259	10	1	1	rs112633029	1	rs112633029
360	rs11922218	3	125631289	8.53479e-20	125539252	125800700	85	1	1	rs11922218	1	rs11922218
361	rs73201027	3	127177635	3.2197e-42	127169024	127177635	2	1	1	rs73201027	1	rs73201027
362	rs6805783	3	130483398	5.76026e-39	130132669	130499710	57	2	2	rs13062453;rs6805783	2	rs13062453;rs6805783
363	rs2084003	3	133284441	8.65037e-38	133268680	133284441	25	1	1	rs2084003	1	rs2084003
364	rs4854785	3	133717948	1.12819e-12	133717948	133988241	14	2	2	rs4854785;rs3890774	2	rs4854785;rs3890774
365	rs9845862	3	136472573	2.2299e-08	135814627	136521165	57	1	1	rs9845862	1	rs9845862
366	rs4683818	3	139229619	7.71262e-20	139052394	139231914	21	1	1	rs4683818	1	rs4683818
367	rs349505	3	140222610	4.09748e-110	140222610	140239970	6	1	1	rs349505	1	rs349505
368	rs6783203	3	142348062	1.94365e-09	142003664	142397620	47	1	1	rs6783203	1	rs6783203
369	rs6807319	3	143440698	5.89499e-09	143439093	143440816	3	1	1	rs6807319	1	rs6807319
370	rs728053	3	144100011	9.81152e-18	144100011	144143556	8	1	1	rs728053	1	rs728053
371	rs12490436	3	146332300	8.98738e-27	146288414	146335661	33	2	1	rs12490436	1	rs12490436
372	rs923763	3	148318399	2.39071e-17	148259705	148498658	33	16	2	rs923763;rs2261948	2	rs923763;rs2261948
373	rs9809507	3	149836861	8.97692e-10	149836569	149871910	10	1	1	rs9809507	1	rs9809507
374	rs9836053	3	150885877	2.11279e-159	150881294	151076379	18	6	1	rs9836053	1	rs9836053
375	rs56155810	3	151507013	2.3848e-30	151467376	151509791	34	1	1	rs56155810	1	rs56155810
376	rs28562303	3	151846347	2.37409e-30	151846347	151904266	7	1	1	rs28562303	1	rs28562303
377	rs11709039	3	152332673	2.26022e-11	152318169	152491785	12	1	1	rs11709039	1	rs11709039
378	rs13096609	3	153140796	1e-200	153105165	153163659	22	1	1	rs13096609	1	rs13096609
379	rs1713813	3	153873643	2.99685e-75	153635933	154077807	115	17	1	rs1713813	1	rs1713813
380	rs34810038	3	155373396	9.46392e-42	155081803	155424404	40	15	2	rs13065559;rs34810038	2	rs13065559;rs34810038
381	rs9864425	3	156286090	7.53119e-110	156286090	156331200	36	30	1	rs9864425	1	rs9864425
382	rs1456103	3	157170524	2.39659e-67	157170524	157240416	7	2	2	rs1456103;rs9855702	2	rs1456103;rs9855702
383	rs340316	3	158575264	2.237e-38	158575264	158611091	4	1	1	rs340316	1	rs340316
384	rs34666750	3	159677536	5.99237e-49	159630577	159688029	16	15	1	rs34666750	1	rs34666750
385	rs1839491	3	161126429	1.75256e-10	160587564	161132631	75	2	2	rs1839491;rs11916355	1	rs1839491
386	rs58611065	3	166054726	4.5876e-14	165944167	166257405	70	1	1	rs58611065	1	rs58611065
387	rs9290315	3	167212764	2.20654e-101	166807979	167215663	48	4	2	rs73879615;rs9290315	2	rs73879615;rs9290315
388	rs71304655	3	167509935	2.28554e-13	167487465	167514202	27	1	1	rs71304655	1	rs71304655
389	rs62275743	3	168366300	8.12525e-13	168357410	168392695	4	1	1	rs62275743	1	rs62275743
390	rs13084791	3	168720556	1.37562e-49	168720556	168862026	15	6	1	rs13084791	1	rs13084791
391	rs78416326	3	170074517	1.4839e-09	170074517	170129608	4	1	1	rs78416326	1	rs78416326
392	rs73176200	3	171530777	1e-200	171530777	171530777	1	1	1	rs73176200	1	rs73176200
393	rs34238687	3	173371992	3.08291e-63	173342670	173402813	8	1	1	rs34238687	1	rs34238687
394	rs34064993	3	176503957	2.69292e-14	176496166	176503957	2	1	1	rs34064993	1	rs34064993
395	rs9862300	3	177690873	2.29432e-19	177651055	177712133	24	1	1	rs9862300	1	rs9862300
396	rs73188921	3	178986121	1e-200	178979168	178988564	3	1	1	rs73188921	1	rs73188921
397	rs6798998	3	181513216	2.85291e-12	181513216	181521530	12	1	1	rs6798998	1	rs6798998
398	rs142231080	3	183135773	8.23777e-26	183132586	183187808	35	2	1	rs142231080	1	rs142231080
399	rs13073717	3	184719233	1.5589e-24	184569253	184794933	35	1	1	rs13073717	1	rs13073717
400	rs4389513	3	185506857	1.3036e-10	185497552	185538006	45	8	1	rs4389513	1	rs4389513
401	rs56386167	3	186128772	1.94723e-44	186128772	186128772	1	1	1	rs56386167	1	rs56386167
402	rs13060312	3	190675956	1.63019e-113	190594454	190675956	33	1	1	rs13060312	1	rs13060312
403	rs1353756	3	192670153	1.14281e-16	192637484	192722100	62	1	1	rs1353756	1	rs1353756
404	rs903305	3	194833811	2.55122e-15	194824928	194880831	15	2	2	rs903305;rs9818897	2	rs903305;rs9818897
405	rs13064611	3	196397558	1.21094e-16	196397558	196397558	1	1	1	rs13064611	1	rs13064611
406	rs524766	3	196686918	4.45215e-129	196686918	196686918	1	1	1	rs524766	1	rs524766
407	rs11730727	4	1738313	7.16831e-09	1691985	1748813	9	1	1	rs11730727	1	rs11730727
408	rs1203863	4	2502637	1e-200	2302865	2502637	6	3	3	rs17819626;rs6824938;rs1203863	3	rs17819626;rs6824938;rs1203863
409	rs4689959	4	4897904	1.01491e-124	4621071	4901304	11	2	2	rs6846897;rs4689959	2	rs6846897;rs4689959
410	rs9999104	4	5449825	7.38186e-66	5434297	5465048	34	1	1	rs9999104	1	rs9999104
411	rs73795164	4	6008151	1.99195e-14	6007400	6008151	2	1	1	rs73795164	1	rs73795164
412	rs2301792	4	6596647	1.71438e-83	6595378	6597915	4	1	1	rs2301792	1	rs2301792
413	rs73796482	4	7193849	1.59474e-106	7192146	7193849	3	1	1	rs73796482	1	rs73796482
414	rs73209450	4	8377733	1.16575e-10	8377733	8377733	1	1	1	rs73209450	1	rs73209450
415	rs61796125	4	13112907	3.46329e-45	13112907	13112907	1	1	1	rs61796125	1	rs61796125
416	rs16891811	4	15377160	1.96381e-14	15358002	15377160	2	1	1	rs16891811	1	rs16891811
417	rs13105883	4	15860271	7.75804e-118	15854420	15860271	2	1	1	rs13105883	1	rs13105883
418	rs16896911	4	18306797	1.76792e-38	18266274	18306797	13	1	1	rs16896911	1	rs16896911
419	rs9991378	4	18584975	7.31937e-61	18584975	18663718	38	1	1	rs9991378	1	rs9991378
420	rs35290237	4	19298630	2.90898e-124	19164473	19300505	42	1	1	rs35290237	1	rs35290237
421	rs4337724	4	21705919	6.6916e-30	21695776	21713759	5	1	1	rs4337724	1	rs4337724
422	rs215449	4	23433898	2.01205e-50	23347600	23444848	16	1	1	rs215449	1	rs215449
423	rs1624041	4	24144642	4.99242e-18	24142218	24146556	4	1	1	rs1624041	1	rs1624041
424	rs167584	4	25348323	5.8919e-47	25288380	25378868	6	1	1	rs167584	1	rs167584
425	rs6837888	4	27179467	1.24958e-33	27179467	27179467	1	1	1	rs6837888	1	rs6837888
426	rs56213104	4	27639889	2.02966e-15	27635619	27659786	10	1	1	rs56213104	1	rs56213104
427	rs12504289	4	29505813	7.37321e-39	29505813	29512849	4	1	1	rs12504289	1	rs12504289
428	rs1426991	4	31350033	4.43299e-09	31344734	31358458	4	1	1	rs1426991	1	rs1426991
429	rs874950	4	33299963	2.82946e-14	33236289	33302490	38	2	1	rs874950	1	rs874950
430	rs2035356	4	34528256	2.98884e-70	34497629	34716676	17	1	1	rs2035356	1	rs2035356
431	rs13110947	4	36101738	7.54173e-25	36059603	36149113	19	2	1	rs13110947	1	rs13110947
432	rs6419096	4	36980807	1e-200	36967932	37066641	34	1	1	rs6419096	1	rs6419096
433	rs1479759	4	37372345	6.79664e-37	37372345	37385794	4	1	1	rs1479759	1	rs1479759
434	rs4974986	4	39166928	4.84346e-24	39046651	39298901	88	6	2	rs4974986;rs3733274	1	rs4974986
435	rs73242422	4	39868012	7.78973e-38	39621817	40024343	37	2	2	rs28486070;rs73242422	2	rs28486070;rs73242422
436	rs1492505	4	40373150	5.22319e-12	40373150	40373150	1	1	1	rs1492505	1	rs1492505
437	rs9985691	4	42858160	4.75902e-14	42854493	42858212	5	1	1	rs9985691	1	rs9985691
438	rs35730331	4	43166348	8.83996e-95	43153207	43177464	9	1	1	rs35730331	1	rs35730331
439	rs10938397	4	45182527	3.29499e-08	45165650	45187622	4	1	1	rs10938397	1	rs10938397
440	rs10022897	4	47493210	7.14304e-21	47487837	47746257	29	2	2	rs10022897;rs13146670	2	rs10022897;rs13146670
441	rs7654665	4	57923774	1.81605e-17	57752550	58172783	44	15	2	rs7654665;rs2535552	2	rs7654665;rs2535552
442	rs55842131	4	58754578	4.90597e-61	58731967	59202689	50	2	2	rs55842131;rs2060321	2	rs55842131;rs2060321
443	rs73194855	4	59924190	4.18769e-29	59857643	60399615	72	5	4	rs73194855;rs11721386;rs7694538;rs11946331	3	rs73194855;rs7694538;rs11946331
444	rs28758322	4	61148146	1e-200	60885004	61692915	228	8	4	rs28758322;rs59591654;rs1511125;rs112799026	4	rs28758322;rs59591654;rs1511125;rs112799026
445	rs7673616	4	64464892	1.10904e-13	64396840	64499295	26	1	1	rs7673616	1	rs7673616
446	rs17736718	4	67704942	2.29181e-84	67682772	67704942	12	1	1	rs17736718	1	rs17736718
447	rs12508442	4	68106430	3.34936e-41	68106430	68106430	1	1	1	rs12508442	1	rs12508442
448	rs4860286	4	69060535	3.12007e-75	69050873	69338138	41	2	2	rs4860286;rs2045098	2	rs4860286;rs2045098
449	rs13133087	4	70266015	1.96911e-129	70204555	70312325	66	1	1	rs13133087	1	rs13133087
450	rs776847	4	70892669	2.20425e-09	70775593	71012177	40	2	2	rs776847;rs777400	2	rs776847;rs777400
451	rs6831852	4	71978043	5.66447e-12	71975144	71988030	6	1	1	rs6831852	1	rs6831852
452	rs17774118	4	72796639	2.14928e-71	72657637	72796639	40	4	3	rs842882;rs4694439;rs17774118	3	rs842882;rs4694439;rs17774118
453	rs56309753	4	74287684	5.60425e-21	74228004	74324814	5	1	1	rs56309753	1	rs56309753
454	rs1350665	4	75204442	1.70009e-84	75201165	75231866	33	2	1	rs1350665	1	rs1350665
455	rs1496592	4	79479733	4.30027e-20	79477006	79487642	7	1	1	rs1496592	1	rs1496592
456	rs6838535	4	80640297	2.0077e-09	80609680	80660818	25	1	1	rs6838535	1	rs6838535
457	rs17005205	4	82817672	2.74856e-70	82810673	82945806	30	2	2	rs17005205;rs66672276	2	rs17005205;rs66672276
458	rs10026779	4	84171847	2.23852e-38	84162658	84194328	45	1	1	rs10026779	1	rs10026779
459	rs62305339	4	84491716	1.13788e-155	84483948	84550837	26	1	1	rs62305339	1	rs62305339
460	rs12642612	4	85392995	1.34395e-08	85345129	85392995	7	1	1	rs12642612	1	rs12642612
461	rs2869722	4	88823621	1.33252e-15	88451115	88846766	41	3	3	rs11097162;rs7680291;rs2869722	3	rs11097162;rs7680291;rs2869722
462	rs10470886	4	89902397	1.01494e-37	89893450	89918717	3	1	1	rs10470886	1	rs10470886
463	rs7653897	4	90169925	2.6108e-25	90169925	90184457	4	1	1	rs7653897	1	rs7653897
464	rs7696173	4	91294207	9.08753e-23	91290376	91309492	11	1	1	rs7696173	1	rs7696173
465	rs6532318	4	92475543	3.91765e-13	92429471	92606874	37	1	1	rs6532318	1	rs6532318
466	rs72873047	4	94574575	3.53954e-11	94539137	94598772	6	1	1	rs72873047	1	rs72873047
467	rs55691100	4	98213403	9.73271e-18	97920861	98274620	255	1	1	rs55691100	1	rs55691100
468	rs59951580	4	99534556	1e-200	99206009	99534556	3	2	2	rs574880;rs59951580	2	rs574880;rs59951580
469	rs3817083	4	100478624	1.25835e-35	100445763	100504664	18	1	1	rs3817083	1	rs3817083
470	rs6532931	4	102305000	1.31261e-17	102238410	102432199	73	2	1	rs6532931	1	rs6532931
471	rs11725491	4	104965585	2.0833e-44	104945362	105045228	16	2	1	rs11725491	1	rs11725491
472	rs7691063	4	107418496	4.18764e-33	107384284	107449510	13	1	1	rs7691063	1	rs7691063
473	rs1597822	4	109447651	1.17331e-30	109381857	109455695	6	1	1	rs1597822	1	rs1597822
474	rs2129983	4	111704080	5.74573e-12	111641186	111716513	118	86	2	rs2129983;rs1906611	1	rs2129983
475	rs13146871	4	114755337	3.61758e-69	114710456	114862969	68	2	2	rs12499794;rs13146871	2	rs12499794;rs13146871
476	rs10020248	4	117178762	2.07784e-58	117159158	117431326	124	2	2	rs10020248;rs6816911	2	rs10020248;rs6816911
477	rs111626798	4	119352517	3.2655e-49	119273948	119417445	84	32	1	rs111626798	1	rs111626798
478	rs4088802	4	121465431	1e-200	121452307	121472676	12	1	1	rs4088802	1	rs4088802
479	rs28602535	4	122479906	5.31896e-22	122302135	122541531	17	3	3	rs1713902;rs28602535;rs17051371	3	rs1713902;rs28602535;rs17051371
480	rs72923970	4	123076361	4.70487e-75	123030583	123561869	222	1	1	rs72923970	1	rs72923970
481	rs993704	4	125712060	3.26035e-42	125669697	125718227	17	1	1	rs993704	1	rs993704
482	rs73849222	4	126366058	1.0323e-26	126328633	126366058	2	1	1	rs73849222	1	rs73849222
483	rs6845383	4	127622623	1.14395e-13	127411321	127626644	20	2	2	rs113068613;rs6845383	2	rs113068613;rs6845383
484	rs17293359	4	128083879	6.89973e-29	127996159	128144034	18	1	1	rs17293359	1	rs17293359
485	rs4833389	4	128664440	7.74042e-44	128656962	129220020	131	2	2	rs4833389;rs62334633	1	rs4833389
486	rs2655310	4	130017919	2.21829e-21	129732799	130320233	33	2	2	rs2655310;rs7691747	2	rs2655310;rs7691747
487	rs13134662	4	134377197	8.51553e-54	134346890	134382322	11	1	1	rs13134662	1	rs13134662
488	rs12641388	4	136680415	3.48694e-09	136636836	136738173	49	2	1	rs12641388	1	rs12641388
489	rs35678317	4	137393397	2.53686e-16	137351950	137399720	11	1	1	rs35678317	1	rs35678317
490	rs2052751	4	139412927	1e-200	139406983	139701813	26	7	2	rs2052751;rs7698697	2	rs2052751;rs7698697
491	rs72724738	4	140054499	4.89375e-89	140054499	140054499	1	1	1	rs72724738	1	rs72724738
492	rs10026813	4	140816174	1e-200	140760623	140819016	12	2	2	rs4863516;rs10026813	2	rs4863516;rs10026813
493	rs11100668	4	141693250	1.56622e-09	141623003	141718599	21	9	1	rs11100668	1	rs11100668
494	rs715378	4	142161354	7.77373e-09	142078814	142162375	21	1	1	rs715378	1	rs715378
495	rs12233703	4	143630177	3.53708e-17	143619586	144214991	215	106	2	rs12233703;rs6822299	1	rs12233703
496	rs10032932	4	144508554	1e-200	144508388	144514846	14	1	1	rs10032932	1	rs10032932
497	rs12644218	4	148017274	2.10744e-34	148016702	148021582	6	1	1	rs12644218	1	rs12644218
498	rs11099673	4	148899082	1.28123e-19	148899082	148903516	2	1	1	rs11099673	1	rs11099673
499	rs11736001	4	149813345	4.92978e-35	149421091	149900236	21	2	2	rs28883992;rs11736001	2	rs28883992;rs11736001
500	rs10022945	4	154342296	4.63669e-81	154265576	154348097	21	2	1	rs10022945	1	rs10022945
501	rs7667718	4	154731642	3.50327e-20	154675283	154769933	33	1	1	rs7667718	1	rs7667718
502	rs2227423	4	155492249	3.4318e-27	155475820	155492620	8	1	1	rs2227423	1	rs2227423
503	rs1080262	4	155797151	9.14333e-52	155779641	155797151	5	1	1	rs1080262	1	rs1080262
504	rs10016993	4	156470555	9.47446e-18	156458998	156511179	9	1	1	rs10016993	1	rs10016993
505	rs35383016	4	160464731	1.29853e-38	160378060	160464731	34	2	1	rs35383016	1	rs35383016
506	rs10029616	4	162239084	1.1954e-27	162220522	162239514	24	2	2	rs10029616;rs4263351	1	rs10029616
507	rs2315664	4	163808442	4.15132e-08	163800988	163833448	39	1	1	rs2315664	1	rs2315664
508	rs79039108	4	165390137	3.20007e-20	165324532	165416402	21	1	1	rs79039108	1	rs79039108
509	rs62345221	4	171887971	7.01515e-41	171851816	172011097	24	1	1	rs62345221	1	rs62345221
510	rs6827175	4	177314205	4.36451e-65	177314205	177334829	4	1	1	rs6827175	1	rs6827175
511	rs11131759	4	177706643	1.88814e-23	177611482	177737372	81	1	1	rs11131759	1	rs11131759
512	rs2715529	4	179456715	8.52212e-11	179246720	179472303	33	2	2	rs13101634;rs2715529	2	rs13101634;rs2715529
513	rs4241710	4	180639279	1.02577e-41	180624934	180653993	4	1	1	rs4241710	1	rs4241710
514	rs963296	4	181126952	1.61717e-97	181125418	181146155	5	1	1	rs963296	1	rs963296
515	rs12512696	4	181747488	1.41686e-16	181747488	181779968	4	1	1	rs12512696	1	rs12512696
516	rs34781781	4	183929075	5.58749e-68	183900179	183930956	12	1	1	rs34781781	1	rs34781781
517	rs35304118	4	184680209	1e-200	184573603	184688121	9	2	2	rs114129693;rs35304118	2	rs114129693;rs35304118
518	rs4333228	4	185850395	3.44501e-11	185834359	185853007	6	1	1	rs4333228	1	rs4333228
519	rs6552981	4	187334888	8.6552e-12	187327545	187346595	11	1	1	rs6552981	1	rs6552981
520	rs4241838	4	187980880	7.44628e-70	187971754	188204284	38	2	2	rs4241838;rs116765782	2	rs4241838;rs116765782
521	rs55767222	4	189297568	8.72364e-23	189075864	189309668	21	2	2	rs4862964;rs55767222	2	rs4862964;rs55767222
522	rs1973008	4	190483248	1.09026e-11	190470846	190495799	21	1	1	rs1973008	1	rs1973008
523	rs4957018	5	314011	2.6177e-16	174435	366555	34	2	1	rs4957018	1	rs4957018
524	rs27066	5	1359133	4.41838e-36	1359133	1359133	1	1	1	rs27066	1	rs27066
525	rs316584	5	2317367	2.01291e-104	2317367	2460984	2	2	2	rs316584;rs35711527	2	rs316584;rs35711527
526	rs10041378	5	4094165	1.45258e-159	4094165	4100373	5	1	1	rs10041378	1	rs10041378
527	rs4702294	5	5844749	9.77054e-95	5831148	5849677	10	2	2	rs218317;rs4702294	2	rs218317;rs4702294
528	rs1108209	5	7847301	6.1954e-09	7833491	7850785	7	1	1	rs1108209	1	rs1108209
529	rs886510	5	9155810	9.32633e-27	9155810	9157275	2	1	1	rs886510	1	rs886510
530	rs218049	5	9602682	1.28308e-28	9602682	9602682	1	1	1	rs218049	1	rs218049
531	rs12523335	5	10664578	1.28776e-116	10647434	10665559	13	1	1	rs12523335	1	rs12523335
532	rs7704256	5	11160431	6.71135e-198	11160431	11160431	1	1	1	rs7704256	1	rs7704256
533	rs7731573	5	12156978	1.15028e-11	12017714	12423456	69	2	1	rs7731573	1	rs7731573
534	rs375868	5	13619672	3.38609e-24	13612401	13633294	5	1	1	rs375868	1	rs375868
535	rs249493	5	14144399	1.17579e-76	14144399	14163053	7	1	1	rs249493	1	rs249493
536	rs989120	5	18012479	3.3369e-43	18012479	18044740	17	1	1	rs989120	1	rs989120
537	rs62350955	5	18434823	1.05826e-63	18417059	18713975	156	3	2	rs62350955;rs1587190	2	rs62350955;rs1587190
538	rs1689695	5	19500888	4.85946e-23	19247567	19537852	23	2	2	rs79161225;rs1689695	2	rs79161225;rs1689695
539	rs12332147	5	20565179	2.25393e-27	20565179	20583877	2	1	1	rs12332147	1	rs12332147
540	rs55783840	5	21379136	9.34676e-14	21371094	21573200	106	28	1	rs55783840	1	rs55783840
541	rs66783663	5	22642534	4.59591e-149	22484224	22654750	44	1	1	rs66783663	1	rs66783663
542	rs6879916	5	23312603	1.0592e-22	23251078	23403993	76	2	2	rs6879916;rs35625779	1	rs6879916
543	rs6879518	5	27199033	1.49054e-09	27170375	27296914	13	1	1	rs6879518	1	rs6879518
544	rs1147226	5	32852778	8.88548e-11	32848997	32907270	16	1	1	rs1147226	1	rs1147226
545	rs846340	5	33342165	3.30929e-39	33323353	33394654	16	1	1	rs846340	1	rs846340
546	rs37431	5	34923435	6.65088e-20	34872235	34987895	8	1	1	rs37431	1	rs37431
547	rs16903859	5	38108611	2.35546e-66	38108611	38259162	22	2	2	rs16903859;rs2561095	2	rs16903859;rs2561095
548	rs6861121	5	40668727	2.34694e-14	40642582	40676199	7	1	1	rs6861121	1	rs6861121
549	rs76831956	5	41387804	6.4547e-58	41279188	41426415	13	2	1	rs76831956	1	rs76831956
550	rs6451624	5	42519262	3.59433e-76	42374873	42531580	48	24	1	rs6451624	1	rs6451624
551	rs12518779	5	44185433	2.55575e-45	44053616	44281080	42	1	1	rs12518779	1	rs12518779
552	rs12522524	5	45257086	1e-200	44993157	45383824	64	3	2	rs12522524;rs13168931	2	rs12522524;rs13168931
553	rs11747651	5	49444680	2.55392e-26	49422797	49806626	312	1	1	rs11747651	1	rs11747651
554	rs35815683	5	50250792	1.16577e-18	50166439	50250792	18	1	1	rs35815683	1	rs35815683
555	rs10036772	5	51224833	1.31537e-27	51203147	51251902	34	1	1	rs10036772	1	rs10036772
556	rs7701478	5	51826534	8.27695e-16	51770266	51846161	47	1	1	rs7701478	1	rs7701478
557	rs3212402	5	52306044	4.24238e-37	52306044	52322982	4	1	1	rs3212402	1	rs3212402
558	rs6864802	5	52809884	1.15752e-09	52809884	52809884	1	1	1	rs6864802	1	rs6864802
559	rs4504348	5	53725690	1.45575e-08	53720615	53725690	3	1	1	rs4504348	1	rs4504348
560	rs409095	5	54435532	1.36739e-146	54221925	54498490	43	26	2	rs6876122;rs409095	2	rs6876122;rs409095
561	rs57083241	5	55194115	7.14689e-10	55194112	55194115	2	1	1	rs57083241	1	rs57083241
562	rs16886257	5	56062821	8.90753e-16	55857025	56276493	61	3	3	rs28650790;rs16886257;rs166169	3	rs28650790;rs16886257;rs166169
563	rs6894735	5	57886875	1.95242e-78	57814133	57894033	20	1	1	rs6894735	1	rs6894735
564	rs409363	5	62577126	2.79415e-60	62185547	62929701	68	5	4	rs16891224;rs10471569;rs409363;rs56002748	4	rs16891224;rs10471569;rs409363;rs56002748
565	rs152943	5	65238285	2.25867e-11	65238285	65420393	11	1	1	rs152943	1	rs152943
566	rs10071033	5	65982181	1.52451e-09	65969344	65997646	11	1	1	rs10071033	1	rs10071033
567	rs9291877	5	66516902	3.40141e-09	66516902	66523880	7	1	1	rs9291877	1	rs9291877
568	rs9688196	5	67430335	1.19208e-16	67414859	67472266	21	1	1	rs9688196	1	rs9688196
569	rs6897294	5	71380914	2.00013e-91	71375362	71380914	5	1	1	rs6897294	1	rs6897294
570	rs1532687	5	73013115	7.69085e-13	72922074	73031129	22	2	1	rs1532687	1	rs1532687
571	rs4479825	5	73527328	8.53646e-20	73527328	73527328	1	1	1	rs4479825	1	rs4479825
572	rs7711157	5	74239494	1.37762e-24	74227324	74240012	5	1	1	rs7711157	1	rs7711157
573	rs7729082	5	76142020	7.54569e-38	75750197	76145292	25	4	4	rs10077518;rs7722628;rs10462357;rs7729082	4	rs10077518;rs7722628;rs10462357;rs7729082
574	rs13182395	5	76607335	3.49576e-70	76605086	76674827	14	1	1	rs13182395	1	rs13182395
575	rs58244993	5	77429949	2.78618e-99	77373507	77539611	53	1	1	rs58244993	1	rs58244993
576	rs62377912	5	78279013	7.50178e-39	78272989	78285921	4	2	1	rs62377912	1	rs62377912
577	rs112782375	5	79626388	1.09343e-26	79613748	79673219	17	1	1	rs112782375	1	rs112782375
578	rs13182474	5	80861777	1.22989e-11	80757411	80889270	12	2	1	rs13182474	1	rs13182474
579	rs62360151	5	83711091	1e-200	83711091	83717504	2	1	1	rs62360151	1	rs62360151
580	rs661311	5	88034867	4.56899e-22	87986239	88139622	23	13	1	rs661311	1	rs661311
581	rs1895449	5	90744106	2.67133e-14	90659329	90789810	18	1	1	rs1895449	1	rs1895449
582	rs12374470	5	93481046	1.10919e-99	93051362	93563247	43	1	1	rs12374470	1	rs12374470
583	rs2216752	5	96185467	5.09188e-47	96120198	96185467	7	1	1	rs2216752	1	rs2216752
584	rs78464582	5	97519782	2.52034e-21	97515754	97603120	68	47	1	rs78464582	1	rs78464582
585	rs2112882	5	103086522	6.82176e-33	102941485	103174957	32	3	3	rs78678162;rs2112882;rs12189068	2	rs78678162;rs2112882
586	rs4551054	5	105882293	1.17811e-154	105882293	105882293	1	1	1	rs4551054	1	rs4551054
587	rs4705801	5	112515405	4.00059e-22	112499206	112934276	36	2	2	rs4705801;rs13171482	2	rs4705801;rs13171482
588	rs73251979	5	115040470	2.48961e-37	115009896	115069254	21	2	1	rs73251979	1	rs73251979
589	rs62374136	5	118435648	6.97239e-10	118410936	118554920	20	1	1	rs62374136	1	rs62374136
590	rs2973972	5	119260346	5.52488e-23	119231185	119277228	14	1	1	rs2973972	1	rs2973972
591	rs4895310	5	120839597	1.13138e-21	120839597	120877145	7	1	1	rs4895310	1	rs4895310
592	rs62371738	5	123815509	8.50102e-12	123806043	123844145	24	1	1	rs62371738	1	rs62371738
593	rs11747137	5	124477591	4.98076e-20	124458236	124484105	18	1	1	rs11747137	1	rs11747137
594	rs12187397	5	125593382	4.85647e-10	125525984	125593382	8	1	1	rs12187397	1	rs12187397
595	rs248711	5	127017331	1.32436e-50	126996687	127092241	31	1	1	rs248711	1	rs248711
596	rs36710	5	127559444	2.5957e-34	127545896	127603359	12	2	2	rs36710;rs6595812	2	rs36710;rs6595812
597	rs10059579	5	128048540	1e-200	127972118	128053040	6	1	1	rs10059579	1	rs10059579
598	rs31590	5	131005181	2.04058e-39	130577567	131320961	223	51	1	rs31590	1	rs31590
599	rs3888788	5	133204194	4.33618e-15	133196216	133204194	5	1	1	rs3888788	1	rs3888788
600	rs2214349	5	136934384	1.07444e-11	136934384	136934384	1	1	1	rs2214349	1	rs2214349
601	rs28529244	5	141754120	1.40687e-107	141721654	141757455	10	1	1	rs28529244	1	rs28529244
602	rs13166252	5	142798197	2.06118e-153	142798156	143016080	36	20	2	rs13166252;rs374379	2	rs13166252;rs374379
603	rs17702888	5	143958077	4.03772e-130	143849358	144035990	158	114	1	rs17702888	1	rs17702888
604	rs6866022	5	145236496	1.05364e-61	145236496	145698018	131	6	3	rs6866022;rs7725650;rs2963920	3	rs6866022;rs7725650;rs2963920
605	rs6872292	5	146711782	2.84901e-22	146711782	146742902	6	2	1	rs6872292	1	rs6872292
606	rs4489050	5	147034690	5.11795e-50	147030647	147055199	12	1	1	rs4489050	1	rs4489050
607	rs62377929	5	150740237	2.1694e-69	150729435	151292802	47	4	3	rs62377929;rs6862174;rs3209060	3	rs62377929;rs6862174;rs3209060
608	rs2546327	5	152616309	5.05781e-23	151898364	152716233	145	5	2	rs2964231;rs2546327	2	rs2964231;rs2546327
609	rs71582126	5	155407546	1.04583e-115	155345118	155447516	12	2	2	rs4704858;rs71582126	2	rs4704858;rs71582126
610	rs17053464	5	155780855	7.43458e-44	155773221	155781063	3	1	1	rs17053464	1	rs17053464
611	rs31220	5	156590355	3.04321e-23	156581492	156618130	7	1	1	rs31220	1	rs31220
612	rs77625383	5	157231462	2.02603e-34	157231462	157231462	1	1	1	rs77625383	1	rs77625383
613	rs35939651	5	158539786	1e-200	158535034	158546803	16	1	1	rs35939651	1	rs35939651
614	rs13362062	5	160786065	8.2728e-99	160734952	161121315	48	2	2	rs13362062;rs114395283	2	rs13362062;rs114395283
615	rs1019930	5	166880551	6.67006e-65	166876055	166883589	6	1	1	rs1019930	1	rs1019930
616	rs10072233	5	168165305	4.14621e-39	168060382	168165399	11	1	1	rs10072233	1	rs10072233
617	rs7720655	5	168466569	1.33905e-72	168463664	168752826	13	2	2	rs7720655;rs1592818	2	rs7720655;rs1592818
618	rs888936	5	169923903	1.44271e-30	169923903	169923903	1	1	1	rs888936	1	rs888936
619	rs354958	5	173926691	1.2404e-84	173924906	174011500	5	2	2	rs354958;rs1002247	2	rs354958;rs1002247
620	rs7708822	5	176531995	6.28284e-22	176320106	176532318	42	28	2	rs7708822;rs6878050	1	rs7708822
621	rs6422348	5	177863091	1.43549e-16	177863091	177875181	6	1	1	rs6422348	1	rs6422348
622	rs4701151	5	178886655	1.9922e-18	178886655	178910256	6	1	1	rs4701151	1	rs4701151
623	rs4700907	5	179601674	1.69945e-66	179601487	179601674	5	1	1	rs4700907	1	rs4700907
624	rs57440245	6	616855	3.07833e-101	593289	626835	4	1	1	rs57440245	1	rs57440245
625	rs2008503	6	1256449	1e-200	1255580	1256449	2	1	1	rs2008503	1	rs2008503
626	rs1033489	6	1592870	1.47199e-11	1592870	1592870	1	1	1	rs1033489	1	rs1033489
627	rs13191094	6	2395245	3.49417e-105	2212169	2455730	36	5	2	rs2505673;rs13191094	2	rs2505673;rs13191094
628	rs72844631	6	3413851	2.98074e-13	3411865	3413851	3	1	1	rs72844631	1	rs72844631
629	rs226919	6	3704142	2.33423e-15	3690330	3704142	3	1	1	rs226919	1	rs226919
630	rs2773300	6	5242329	6.77228e-28	5242099	5272559	22	1	1	rs2773300	1	rs2773300
631	rs72650646	6	5848827	1.64692e-09	5848827	5894114	23	1	1	rs72650646	1	rs72650646
632	rs3761986	6	6680510	5.61689e-174	6680172	6680510	2	1	1	rs3761986	1	rs3761986
633	rs9392196	6	8049632	4.77437e-08	8022901	8065230	13	1	1	rs9392196	1	rs9392196
634	rs111473930	6	11097291	5.68803e-47	10914830	11236573	24	4	4	rs111473930;rs9368620;rs12203306;rs12663441	2	rs111473930;rs12663441
635	rs7760016	6	12908077	4.48017e-09	12889145	12935860	14	5	1	rs7760016	1	rs7760016
636	rs9475276	6	13746106	2.64873e-18	13656633	13754265	11	1	1	rs9475276	1	rs9475276
637	rs10498688	6	17822774	4.23348e-16	17503829	17942566	18	3	2	rs7744716;rs10498688	2	rs7744716;rs10498688
638	rs9465358	6	19359630	1e-200	18861968	19359630	132	59	2	rs7757063;rs9465358	2	rs7757063;rs9465358
639	rs4710914	6	19654713	5.29009e-60	19653225	19673412	5	4	2	rs4710914;rs1936894	2	rs4710914;rs1936894
640	rs1998992	6	20260978	4.31912e-156	20254481	20306570	43	1	1	rs1998992	1	rs1998992
641	rs55981820	6	22224866	1.83941e-40	22224866	22251715	2	1	1	rs55981820	1	rs55981820
642	rs13200993	6	22612912	1.15411e-08	22573776	22615699	28	12	1	rs13200993	1	rs13200993
643	rs78772607	6	23544264	3.45488e-27	23516146	23589474	18	1	1	rs78772607	1	rs78772607
644	rs6930083	6	36634156	3.07338e-08	36632184	36643630	7	2	1	rs6930083	1	rs6930083
645	rs302596	6	39671680	3.03956e-34	39563738	39720631	47	5	1	rs302596	1	rs302596
646	rs6458282	6	42486921	1.29559e-19	42486921	42514332	10	1	1	rs6458282	1	rs6458282
647	rs9369422	6	43777297	1.48877e-125	43769544	43777297	4	1	1	rs9369422	1	rs9369422
648	rs12209785	6	45506122	2.69216e-24	45443176	45519382	35	25	1	rs12209785	1	rs12209785
649	rs2211639	6	48821000	1.12466e-20	48524110	48973340	62	3	1	rs2211639	1	rs2211639
650	rs9395496	6	49470452	1.1919e-71	49468960	49486653	4	1	1	rs9395496	1	rs9395496
651	rs9369922	6	49868405	4.17609e-71	49866053	49868405	2	1	1	rs9369922	1	rs9369922
652	rs72901012	6	50935358	2.95247e-81	50757076	51160926	37	8	2	rs72901012;rs2465042	2	rs72901012;rs2465042
653	rs10948626	6	51429680	1.88309e-23	51416428	51500681	14	1	1	rs10948626	1	rs10948626
654	rs4715315	6	52625891	3.4052e-13	52621433	52731008	13	1	1	rs4715315	1	rs4715315
655	rs9382207	6	53277210	9.13471e-24	53236883	53277210	12	1	1	rs9382207	1	rs9382207
656	rs7766458	6	54140128	5.18904e-70	53960803	54323458	75	36	3	rs7766458;rs1321892;rs243818	2	rs7766458;rs243818
657	rs9370465	6	55611011	1.10914e-16	55582166	55611011	22	1	1	rs9370465	1	rs9370465
658	rs9396249	6	56866094	4.98308e-35	56749652	56892646	24	1	1	rs9396249	1	rs9396249
659	rs147571544	6	57785141	2.44797e-21	57270042	58780039	345	15	2	rs147571544;rs2342109	2	rs147571544;rs2342109
660	rs13195737	6	63045020	4.71753e-33	62772306	63553373	146	3	3	rs13195737;rs2345979;rs2752989	1	rs13195737
661	rs1482459	6	64593687	8.93478e-76	64354959	65242725	325	2	2	rs1482459;rs4504461	2	rs1482459;rs4504461
662	rs9453377	6	66422888	3.80327e-15	66056310	66514965	72	2	2	rs9453273;rs9453377	2	rs9453273;rs9453377
663	rs13201474	6	67490648	6.15524e-40	67468292	67551282	10	1	1	rs13201474	1	rs13201474
664	rs9363732	6	67959832	4.80391e-144	67943136	67999611	7	1	1	rs9363732	1	rs9363732
665	rs7772498	6	68846284	1.4928e-10	68824411	68846284	5	1	1	rs7772498	1	rs7772498
666	rs62406770	6	69802816	3.72534e-28	69339009	69844570	27	2	2	rs2880145;rs62406770	2	rs2880145;rs62406770
667	rs9455015	6	70954877	1e-200	70934291	70976005	31	14	1	rs9455015	1	rs9455015
668	rs1583606	6	74655140	1.09813e-29	74588478	74700982	132	1	1	rs1583606	1	rs1583606
669	rs9359149	6	76638950	9.17117e-73	76629012	76655075	7	1	1	rs9359149	1	rs9359149
670	rs10943409	6	77772237	5.2865e-182	77709054	77837367	56	1	1	rs10943409	1	rs10943409
671	rs4455626	6	81251731	2.00518e-83	80432740	81332707	94	4	4	rs9343932;rs4706827;rs3812121;rs4455626	3	rs9343932;rs4706827;rs4455626
672	rs194894	6	82423281	2.36233e-13	82419804	82441417	8	1	1	rs194894	1	rs194894
673	rs388857	6	83383217	2.49577e-125	83367832	83546219	18	2	2	rs388857;rs9344315	2	rs388857;rs9344315
674	rs9450866	6	88749181	1.30715e-09	88727565	88788316	14	1	1	rs9450866	1	rs9450866
675	rs7767196	6	90437699	3.55519e-41	90338496	90619925	17	1	1	rs7767196	1	rs7767196
676	rs28718866	6	92291203	1e-200	92002947	92293702	8	2	2	rs9359935;rs28718866	2	rs9359935;rs28718866
677	rs2555739	6	93218349	1.09701e-13	93216851	93252597	10	1	1	rs2555739	1	rs2555739
678	rs4839903	6	97742108	2.02768e-26	97593972	97751495	39	1	1	rs4839903	1	rs4839903
679	rs12605	6	99880131	1.36305e-18	99822020	99908084	19	1	1	rs12605	1	rs12605
680	rs600653	6	101370944	4.50455e-30	101077188	101695138	49	1	1	rs600653	1	rs600653
681	rs7775876	6	102225817	1.3361e-103	102200013	102595669	66	31	2	rs7775876;rs2243643	2	rs7775876;rs2243643
682	rs4947057	6	103184040	3.7492e-11	103100996	103225719	35	1	1	rs4947057	1	rs4947057
683	rs4946943	6	103736608	8.97522e-19	103613272	103828161	37	1	1	rs4946943	1	rs4946943
684	rs9404590	6	105401013	6.48505e-24	105370965	105430188	3	1	1	rs9404590	1	rs9404590
685	rs580187	6	106767576	2.48063e-51	106434872	106795130	19	2	2	rs7758500;rs580187	2	rs7758500;rs580187
686	rs11963043	6	107213712	3.27209e-95	107213712	107213712	1	1	1	rs11963043	1	rs11963043
687	rs2073209	6	110636857	1.80788e-27	110623850	110649463	9	1	1	rs2073209	1	rs2073209
688	rs9488095	6	113510245	1e-200	113371061	113517350	32	1	1	rs9488095	1	rs9488095
689	rs2205736	6	114705017	4.96611e-25	114662753	114705017	5	1	1	rs2205736	1	rs2205736
690	rs9400990	6	117538290	1.36991e-11	117538290	117569304	10	1	1	rs9400990	1	rs9400990
691	rs55655349	6	118062315	1.47966e-32	117939815	118323173	36	3	3	rs1827327;rs55655349;rs1416421	3	rs1827327;rs55655349;rs1416421
692	rs60525841	6	120827282	1.27265e-135	120474192	121075485	168	4	4	rs17081981;rs720358;rs9401290;rs60525841	3	rs17081981;rs720358;rs60525841
693	rs2208783	6	124536546	4.79082e-181	124515590	124798850	31	3	2	rs2208783;rs619837	2	rs2208783;rs619837
694	rs9401989	6	127948789	1.2887e-08	127914622	127949860	26	1	1	rs9401989	1	rs9401989
695	rs9491960	6	128790787	2.57564e-20	128790787	128850674	29	9	2	rs9491960;rs1935131	1	rs9491960
696	rs4479965	6	130593687	8.16666e-38	130565840	130768029	87	1	1	rs4479965	1	rs4479965
697	rs9402279	6	131099419	3.80318e-11	131097176	131100145	5	1	1	rs9402279	1	rs9402279
698	rs147301664	6	131849850	1.44078e-27	131849850	131849850	1	1	1	rs147301664	1	rs147301664
699	rs7754859	6	132212808	2.28912e-10	132203741	132215375	6	1	1	rs7754859	1	rs7754859
700	rs4895409	6	134808868	9.06267e-10	134806784	134811266	5	2	1	rs4895409	1	rs4895409
701	rs532654	6	136426779	1.78951e-08	136426779	136426779	1	1	1	rs532654	1	rs532654
702	rs4895472	6	137287954	4.4857e-32	137287076	137539505	12	2	2	rs4895472;rs9376269	2	rs4895472;rs9376269
703	rs112314129	6	138332019	1.98785e-80	138322513	138332243	3	1	1	rs112314129	1	rs112314129
704	rs7751615	6	138779704	1.67833e-13	138771329	138799859	25	1	1	rs7751615	1	rs7751615
705	rs9376393	6	139325711	1.58651e-09	139071974	139325711	15	2	2	rs9495252;rs9376393	2	rs9495252;rs9376393
706	rs73563232	6	140204611	6.03574e-20	140204611	140217168	4	1	1	rs73563232	1	rs73563232
707	rs13210804	6	144399703	1.19534e-13	144363450	144399703	3	1	1	rs13210804	1	rs13210804
708	rs7750326	6	145037578	4.64459e-56	145037578	145129416	12	1	1	rs7750326	1	rs7750326
709	rs10484702	6	145528057	1.23731e-11	145528057	145716249	16	2	2	rs10484702;rs474416	2	rs10484702;rs474416
710	rs702356	6	147934061	1.60896e-28	147934061	147934061	1	1	1	rs702356	1	rs702356
711	rs9322149	6	148732736	2.94956e-20	148732736	148759896	2	1	1	rs9322149	1	rs9322149
712	rs62441727	6	149800870	5.51412e-132	149688089	149800870	8	1	1	rs62441727	1	rs62441727
713	rs9371955	6	150659958	1.66349e-08	150651439	150659958	3	1	1	rs9371955	1	rs9371955
714	rs9478911	6	151323664	5.09888e-20	151286429	151323664	13	1	1	rs9478911	1	rs9478911
715	rs9479142	6	152244787	1.08091e-08	152202621	152254115	9	1	1	rs9479142	1	rs9479142
716	rs12204238	6	153442795	8.66162e-09	153407049	153495003	12	2	1	rs12204238	1	rs12204238
717	rs6933364	6	153911907	1.14717e-63	153815545	154461471	132	4	4	rs2085673;rs6933364;rs2350397;rs558948	4	rs2085673;rs6933364;rs2350397;rs558948
718	rs117824256	6	155487418	1.04302e-31	155486976	155493796	11	1	1	rs117824256	1	rs117824256
719	rs4870412	6	156308324	2.98653e-08	156293739	156335741	18	1	1	rs4870412	1	rs4870412
720	rs10806697	6	159036016	5.24553e-14	159035511	159036016	2	1	1	rs10806697	1	rs10806697
721	rs1762101	6	159643992	2.05612e-62	159643992	159709784	30	1	1	rs1762101	1	rs1762101
722	rs220729	6	160323406	8.30962e-48	160302339	160390988	15	1	1	rs220729	1	rs220729
723	rs1247348	6	161365436	9.45556e-21	160798048	161365436	33	21	4	rs3127602;rs61131294;rs6935921;rs1247348	3	rs3127602;rs6935921;rs1247348
724	rs12206113	6	162047381	2.09428e-105	162047381	162067639	13	1	1	rs12206113	1	rs12206113
725	rs60445937	6	164956606	2.75565e-37	164588002	164966021	48	3	3	rs807903;rs60445937;rs9365706	2	rs807903;rs60445937
726	rs1661402	6	165589390	2.15255e-15	165589390	165618265	7	2	2	rs1661402;rs12525918	1	rs1661402
727	rs4710218	6	167637030	1.36787e-36	167608239	167645891	82	1	1	rs4710218	1	rs4710218
728	rs62423404	6	169054047	2.85367e-11	169041732	169142988	25	1	1	rs62423404	1	rs62423404
729	rs12203323	6	169425778	1.79237e-106	169394996	169440376	12	1	1	rs12203323	1	rs12203323
730	rs13196685	6	170768700	3.28349e-123	170569761	170788914	10	3	2	rs747754;rs13196685	2	rs747754;rs13196685
731	rs6954582	7	1462386	1.42273e-41	1413523	1479274	18	2	2	rs6961195;rs6954582	2	rs6961195;rs6954582
732	rs798495	7	2797267	1.94945e-11	2612867	2901601	56	2	2	rs2917733;rs798495	2	rs2917733;rs798495
733	rs2177168	7	3532425	2.92705e-38	3521658	3709491	52	1	1	rs2177168	1	rs2177168
734	rs685633	7	4187807	1.291e-12	4178378	4197070	12	1	1	rs685633	1	rs685633
735	rs2049342	7	6527642	1.26008e-15	6498057	6528309	3	1	1	rs2049342	1	rs2049342
736	rs34077097	7	7030455	3.05529e-11	7021220	7050369	22	1	1	rs34077097	1	rs34077097
737	rs62433161	7	8206510	1.49165e-85	8206510	8215159	4	1	1	rs62433161	1	rs62433161
738	rs970262	7	8747718	2.53822e-13	8747718	8749762	2	2	1	rs970262	1	rs970262
739	rs1435535	7	12214836	1e-200	12181938	12222870	16	1	1	rs1435535	1	rs1435535
740	rs17166094	7	12528661	5.45189e-12	12507574	12548024	24	1	1	rs17166094	1	rs17166094
741	rs7803588	7	13081681	4.43847e-11	13081681	13109988	2	1	1	rs7803588	1	rs7803588
742	rs1852181	7	13657994	1.00941e-30	13657944	13657994	2	1	1	rs1852181	1	rs1852181
743	rs17167948	7	14219123	1.23295e-26	14215922	14435446	10	2	2	rs17167948;rs17168132	2	rs17167948;rs17168132
744	rs10950543	7	15008772	5.01997e-25	14955741	15008772	11	1	1	rs10950543	1	rs10950543
745	rs74297944	7	15855298	2.28085e-26	15830001	15875449	15	1	1	rs74297944	1	rs74297944
746	rs481026	7	16651415	3.72389e-12	16627015	16651415	3	1	1	rs481026	1	rs481026
747	rs671026	7	17095430	1.24125e-22	17074348	17111506	7	1	1	rs671026	1	rs671026
748	rs7801849	7	18828709	1.04593e-31	18786501	19046177	30	4	2	rs7801849;rs2023936	2	rs7801849;rs2023936
749	rs76101313	7	20307093	6.8337e-26	20296367	20328889	13	1	1	rs76101313	1	rs76101313
750	rs56019399	7	20646612	7.00216e-20	20646612	20710655	2	1	1	rs56019399	1	rs56019399
751	rs73066492	7	21615967	1e-200	21397405	21859436	26	16	3	rs35929923;rs73066492;rs1859107	3	rs35929923;rs73066492;rs1859107
752	rs10234716	7	24081855	2.29058e-08	24081855	24086533	3	1	1	rs10234716	1	rs10234716
753	rs10224039	7	24367761	9.03705e-66	24356968	24382410	41	35	1	rs10224039	1	rs10224039
754	rs17150451	7	24929889	2.37591e-105	24929889	25190866	29	2	2	rs17150451;rs4722433	2	rs17150451;rs4722433
755	rs34853751	7	25809045	1e-200	25809045	25835827	2	1	1	rs34853751	1	rs34853751
756	rs7795109	7	29666244	3.69213e-57	29666244	29746082	43	1	1	rs7795109	1	rs7795109
757	rs1990010	7	30844750	2.83808e-12	30811746	30851897	22	1	1	rs1990010	1	rs1990010
758	rs73686889	7	32043357	2.53902e-43	32043357	32043507	2	1	1	rs73686889	1	rs73686889
759	rs62457473	7	32306990	5.92021e-17	32300388	32380810	25	1	1	rs62457473	1	rs62457473
760	rs60310820	7	33186210	2.56446e-22	33177908	33297108	17	1	1	rs60310820	1	rs60310820
761	rs423190	7	34999315	3.80255e-144	34943344	35231725	68	1	1	rs423190	1	rs423190
762	rs74936050	7	36154778	3.32266e-08	36143773	36175516	20	11	1	rs74936050	1	rs74936050
763	rs4720297	7	38658106	4.77725e-09	38644504	38673658	20	10	1	rs4720297	1	rs4720297
764	rs12701716	7	39331323	1.59042e-18	39326538	39356443	11	1	1	rs12701716	1	rs12701716
765	rs17622929	7	41116984	4.59524e-08	41078043	41162228	13	1	1	rs17622929	1	rs17622929
766	rs74745318	7	42189656	7.91455e-49	41870392	42189656	20	3	3	rs68067068;rs846311;rs74745318	3	rs68067068;rs846311;rs74745318
767	rs10243433	7	42557883	2.5368e-17	42556691	42720884	26	2	2	rs10243433;rs79562994	2	rs10243433;rs79562994
768	rs623632	7	43021943	1.99821e-24	43009581	43025652	4	1	1	rs623632	1	rs623632
769	rs17796504	7	43314522	7.25417e-10	43305549	43327070	7	1	1	rs17796504	1	rs17796504
770	rs6966732	7	45461695	1.8902e-09	45428165	45512128	8	1	1	rs6966732	1	rs6966732
771	rs74541093	7	46996297	3.85257e-24	46989393	47013498	15	11	1	rs74541093	1	rs74541093
772	rs10951928	7	47819661	1.1474e-25	47793492	47827729	10	2	2	rs6971770;rs10951928	2	rs6971770;rs10951928
773	rs13236051	7	49097829	1.3749e-08	48963750	49134447	64	2	1	rs13236051	1	rs13236051
774	rs1983159	7	49975018	2.37886e-56	49893406	50086739	51	1	1	rs1983159	1	rs1983159
775	rs6965971	7	51552707	3.95496e-99	51552707	51672328	21	2	2	rs6965971;rs4556045	1	rs6965971
776	rs2052822	7	52932424	7.22033e-38	52639713	52932424	43	3	2	rs213187;rs2052822	2	rs213187;rs2052822
777	rs548125	7	54605182	4.43789e-143	54534400	54605182	38	1	1	rs548125	1	rs548125
778	rs2330948	7	55080356	2.22544e-92	55080356	55111277	4	1	1	rs2330948	1	rs2330948
779	rs12718975	7	55661857	4.81028e-175	55661857	55677684	5	1	1	rs12718975	1	rs12718975
780	rs2908547	7	56176101	3.43459e-96	55956444	56183241	29	1	1	rs2908547	1	rs2908547
781	rs10270190	7	57875304	4.53753e-12	57609985	58048519	114	1	1	rs10270190	1	rs10270190
782	rs2198404	7	62141667	1.18192e-09	61245078	62555408	365	2	1	rs2198404	1	rs2198404
783	rs62461217	7	63658251	5.88906e-55	63379811	64055282	132	2	2	rs62461217;rs73125124	2	rs62461217;rs73125124
784	rs1524858	7	67729665	5.80783e-21	67631872	67860974	61	3	3	rs6955648;rs1524858;rs10950122	2	rs6955648;rs1524858
785	rs2023993	7	68162576	1.11624e-72	68130476	68192776	52	23	1	rs2023993	1	rs2023993
786	rs10244275	7	69801496	2.16453e-39	69468610	69822973	72	3	1	rs10244275	1	rs10244275
787	rs737214	7	70726179	1.76119e-10	70723883	70728217	6	1	1	rs737214	1	rs737214
788	rs10240715	7	71228015	2.78126e-194	71215929	71242888	26	1	1	rs10240715	1	rs10240715
789	rs9638326	7	73826764	2.35557e-33	73811995	73839817	19	2	1	rs9638326	1	rs9638326
790	rs7797393	7	75446303	1.37804e-96	75274876	75483327	25	4	4	rs3857844;rs111447575;rs7797393;rs7786982	3	rs3857844;rs111447575;rs7797393
791	rs3095452	7	76779155	3.38484e-22	76737701	76791184	47	1	1	rs3095452	1	rs3095452
792	rs798332	7	77908928	7.64524e-15	77853579	77911358	42	32	1	rs798332	1	rs798332
793	rs7793390	7	78615062	1.36379e-16	78581959	79052540	67	4	3	rs7793390;rs2191808;rs848904	3	rs7793390;rs2191808;rs848904
794	rs17156851	7	82552605	9.74411e-10	82521020	82552605	5	1	1	rs17156851	1	rs17156851
795	rs11984418	7	84534895	2.16934e-13	84008231	84534895	28	3	2	rs11984418;rs12707654	1	rs11984418
796	rs1114325	7	85606292	1.91014e-28	85606292	85892181	7	5	1	rs1114325	1	rs1114325
797	rs10273340	7	89693450	1.03198e-29	89410663	89715630	32	2	2	rs2188670;rs10273340	2	rs2188670;rs10273340
798	rs11765929	7	90344751	1.3619e-41	90046923	90441366	46	3	2	rs11975090;rs11765929	2	rs11975090;rs11765929
799	rs7788242	7	91079310	1.4242e-123	90988775	91872872	243	50	3	rs7788242;rs2188714;rs13231833	2	rs7788242;rs2188714
800	rs12113049	7	96833467	3.03408e-18	96816829	96879473	20	1	1	rs12113049	1	rs12113049
801	rs13233515	7	98697795	1.80066e-93	98697795	98697795	1	1	1	rs13233515	1	rs13233515
802	rs34883452	7	101141354	2.0488e-31	101101762	101156108	12	1	1	rs34883452	1	rs34883452
803	rs2690932	7	101412503	4.42945e-11	101406636	101415883	8	1	1	rs2690932	1	rs2690932
804	rs6947411	7	105619330	4.44226e-142	105373852	105822856	3	3	3	rs66755434;rs6947411;rs149307564	3	rs66755434;rs6947411;rs149307564
805	rs257379	7	106802823	2.68914e-08	106785231	107173684	92	1	1	rs257379	1	rs257379
806	rs62478652	7	109822740	2.5353e-158	109822740	109833037	12	1	1	rs62478652	1	rs62478652
807	rs34674864	7	112946649	5.64694e-68	112946649	112946649	1	1	1	rs34674864	1	rs34674864
808	rs2245192	7	114002535	1.26382e-10	114002535	114002535	1	1	1	rs2245192	1	rs2245192
809	rs1468150	7	114882351	5.22435e-27	114870193	114920992	11	1	1	rs1468150	1	rs1468150
810	rs10265062	7	115283436	4.29915e-28	115274429	115318901	17	1	1	rs10265062	1	rs10265062
811	rs1860704	7	119927993	1.12976e-45	119770034	120149149	56	2	2	rs1860704;rs11769563	1	rs1860704
812	rs9656282	7	121078042	4.32874e-59	121049332	121098085	56	2	1	rs9656282	1	rs9656282
813	rs2191784	7	123016941	8.5054e-15	123016941	123016941	1	1	1	rs2191784	1	rs2191784
814	rs10254609	7	124348657	4.95419e-53	124299848	124697359	50	3	3	rs62478331;rs10254609;rs13222197	3	rs62478331;rs10254609;rs13222197
815	rs6961208	7	125107738	3.30827e-65	125057678	125191261	32	1	1	rs6961208	1	rs6961208
816	rs28709905	7	125529516	1.77279e-36	125513392	125554036	6	2	1	rs28709905	1	rs28709905
817	rs62477905	7	126268341	2.85411e-27	126194471	126268341	15	2	1	rs62477905	1	rs62477905
818	rs7805466	7	130524369	9.93342e-20	130507355	130570194	5	1	1	rs7805466	1	rs7805466
819	rs1863004	7	135053638	2.49915e-13	135053638	135131963	3	1	1	rs1863004	1	rs1863004
820	rs1673217	7	138290859	3.92295e-105	138290859	138480416	10	3	2	rs1673217;rs62486975	2	rs1673217;rs62486975
821	rs9640925	7	139085288	4.52864e-68	139009280	139136670	120	13	1	rs9640925	1	rs9640925
822	rs7789057	7	141945246	1.77787e-10	141940073	141967327	12	1	1	rs7789057	1	rs7789057
823	rs62472681	7	143049847	5.17757e-120	142695589	143109208	49	6	4	rs58268955;rs62472681;rs7806322;rs10808026	4	rs58268955;rs62472681;rs7806322;rs10808026
824	rs1208171	7	144103132	1.50899e-25	144083523	144166212	14	1	1	rs1208171	1	rs1208171
825	rs1731113	7	144468737	1.49453e-14	144466972	144502053	18	11	1	rs1731113	1	rs1731113
826	rs10240169	7	145337435	3.37318e-18	145212862	145375001	45	1	1	rs10240169	1	rs10240169
827	rs1404802	7	145730908	6.63827e-56	145719821	145743656	20	2	2	rs1404802;rs2056631	1	rs1404802
828	rs6953679	7	147438666	1.77136e-27	147008534	147460364	93	6	2	rs5028055;rs6953679	2	rs5028055;rs6953679
829	rs734002	7	148505788	1.83954e-80	148415810	148557102	23	1	1	rs734002	1	rs734002
830	rs4726187	7	152323122	4.76567e-17	152311492	152324698	7	1	1	rs4726187	1	rs4726187
831	rs2862148	7	153437424	4.57507e-47	153368600	153445382	32	1	1	rs2862148	1	rs2862148
832	rs34755418	7	155043339	5.59325e-34	155019546	155047376	5	2	2	rs12666834;rs34755418	2	rs12666834;rs34755418
833	rs1731846	7	155654231	2.81141e-40	155642282	155654510	9	1	1	rs1731846	1	rs1731846
834	rs2302147	7	156469133	3.43968e-11	156453904	156469133	6	1	1	rs2302147	1	rs2302147
835	rs28452927	7	156800885	1e-200	156797411	157059011	37	13	2	rs28452927;rs62493376	2	rs28452927;rs62493376
836	rs1638006	7	157485165	1.00021e-29	157452030	157489114	12	3	2	rs1638006;rs11764539	1	rs1638006
837	rs3937574	7	157805146	1e-200	157796030	157833105	12	2	2	rs3937574;rs892735	1	rs3937574
838	rs7846371	8	3029409	8.17385e-42	3029409	3296622	64	3	3	rs7846371;rs12681888;rs1447358	3	rs7846371;rs12681888;rs1447358
839	rs2912267	8	3882571	8.73486e-38	3869546	3882632	6	1	1	rs2912267	1	rs2912267
840	rs2977727	8	4838341	6.9046e-43	4616956	4842888	11	2	2	rs1676959;rs2977727	2	rs1676959;rs2977727
841	rs2700786	8	5832225	9.72354e-76	5821240	5852441	52	2	2	rs2840500;rs2700786	2	rs2840500;rs2700786
842	rs59003218	8	8554921	1e-200	8553381	8785880	24	3	2	rs59003218;rs6981787	2	rs59003218;rs6981787
843	rs28404841	8	9719827	1e-200	9692106	9795560	35	1	1	rs28404841	1	rs28404841
844	rs4469501	8	11824956	1.31728e-10	11812454	11836318	14	3	1	rs4469501	1	rs4469501
845	rs7840407	8	13515935	4.09325e-19	13501216	13534973	4	1	1	rs7840407	1	rs7840407
846	rs1155091	8	15239170	1.18235e-09	15217693	15268494	18	2	2	rs1155091;rs1495098	2	rs1155091;rs1495098
847	rs11987217	8	16864548	4.10298e-13	16854803	16864548	7	1	1	rs11987217	1	rs11987217
848	rs4921546	8	17247311	2.11172e-39	17244168	17247311	2	1	1	rs4921546	1	rs4921546
849	rs17125108	8	17538341	1.13885e-65	17508575	17538689	30	4	1	rs17125108	1	rs17125108
850	rs78786063	8	19223674	3.86021e-49	19223674	19223674	1	1	1	rs78786063	1	rs78786063
851	rs2246578	8	22744564	1.03933e-131	22744564	22755944	2	1	1	rs2246578	1	rs2246578
852	rs4440641	8	24091217	5.80367e-38	24091217	24117211	12	1	1	rs4440641	1	rs4440641
853	rs2320783	8	25009089	1.04001e-11	25004519	25024605	11	1	1	rs2320783	1	rs2320783
854	rs4872354	8	25639033	1.78472e-134	25587787	25641757	17	1	1	rs4872354	1	rs4872354
855	rs12674518	8	26319048	1.90802e-09	26308446	26319048	2	1	1	rs12674518	1	rs12674518
856	rs10105720	8	27631719	7.78432e-09	27583046	27691229	26	1	1	rs10105720	1	rs10105720
857	rs2341179	8	30100766	2.24258e-17	30001655	30121037	45	1	1	rs2341179	1	rs2341179
858	rs1919343	8	35158920	1.01948e-77	35044906	35419308	42	3	2	rs1919343;rs2921219	2	rs1919343;rs2921219
859	rs2270376	8	38033989	3.24262e-26	38014429	38310910	126	58	1	rs2270376	1	rs2270376
860	rs10808999	8	38821327	2.5464e-47	38821327	39035280	3	2	2	rs10808999;rs74356030	2	rs10808999;rs74356030
861	rs57283040	8	39820285	1.48651e-34	39795807	39946810	45	2	2	rs57283040;rs61682670	2	rs57283040;rs61682670
862	rs891403	8	40337470	3.43548e-33	40282029	40373375	61	1	1	rs891403	1	rs891403
863	rs60986466	8	41492935	5.03535e-32	41452266	41501525	13	5	1	rs60986466	1	rs60986466
864	rs10109984	8	48803675	1.41897e-21	48221724	48846163	36	1	1	rs10109984	1	rs10109984
865	rs56214700	8	49255947	1.09988e-178	49216315	49520224	20	1	1	rs56214700	1	rs56214700
866	rs1354769	8	56382673	5.31741e-11	56121763	56401011	44	2	2	rs13254818;rs1354769	2	rs13254818;rs1354769
867	rs13279861	8	57211120	1.02272e-09	57161551	57211120	9	1	1	rs13279861	1	rs13279861
868	rs353722	8	57692453	5.7907e-44	57683203	57724174	13	1	1	rs353722	1	rs353722
869	rs6981055	8	58113941	3.743e-12	58002380	58196051	258	106	1	rs6981055	1	rs6981055
870	rs13280150	8	59198884	9.68147e-50	59132836	59242146	31	4	1	rs13280150	1	rs13280150
871	rs6983967	8	59858916	4.72096e-30	59826333	59913536	12	1	1	rs6983967	1	rs6983967
872	rs4738828	8	61727587	4.14064e-52	61592425	61779936	25	1	1	rs4738828	1	rs4738828
873	rs2978544	8	62141022	4.38446e-40	62100195	62198585	54	2	1	rs2978544	1	rs2978544
874	rs75825758	8	69717890	1.75464e-34	69699988	69720073	8	1	1	rs75825758	1	rs75825758
875	rs10504574	8	75252630	6.66291e-30	75252406	75351293	10	1	1	rs10504574	1	rs10504574
876	rs55827099	8	75848662	3.89762e-68	75848662	75881582	13	1	1	rs55827099	1	rs55827099
877	rs1449557	8	76521931	8.5604e-10	76460367	76546264	12	1	1	rs1449557	1	rs1449557
878	rs10504637	8	77652174	8.39143e-20	77590909	77682553	15	1	1	rs10504637	1	rs10504637
879	rs13278246	8	77947683	1.39934e-09	77932786	77947683	4	1	1	rs13278246	1	rs13278246
880	rs13259255	8	79837489	4.56894e-47	79837489	79891287	3	1	1	rs13259255	1	rs13259255
881	rs873249	8	81120591	1.09979e-81	81091521	81137030	78	56	1	rs873249	1	rs873249
882	rs62513212	8	83597846	9.3979e-74	83597846	83780879	25	2	2	rs62513212;rs9643767	2	rs62513212;rs9643767
883	rs12546618	8	87204271	5.65892e-65	87172818	87241797	58	1	1	rs12546618	1	rs12546618
884	rs72670859	8	88595767	1.7392e-11	88546457	88596066	16	1	1	rs72670859	1	rs72670859
885	rs10086609	8	91856154	1.86788e-16	91825431	92012627	47	1	1	rs10086609	1	rs10086609
886	rs4236818	8	94928208	2.5504e-09	94916059	94944448	10	1	1	rs4236818	1	rs4236818
887	rs7821573	8	98183684	4.37974e-38	98183684	98216436	18	1	1	rs7821573	1	rs7821573
888	rs3134306	8	100328798	4.80226e-24	99569792	100822382	196	2	2	rs2310805;rs3134306	2	rs2310805;rs3134306
889	rs2514680	8	101222499	3.88866e-29	101115868	101317715	38	1	1	rs2514680	1	rs2514680
890	rs563201	8	103960710	2.58363e-09	103771046	103971276	13	2	2	rs9649921;rs563201	2	rs9649921;rs563201
891	rs7820626	8	104383315	1.76345e-67	104370733	104441914	10	1	1	rs7820626	1	rs7820626
892	rs2441901	8	105207142	1.44252e-165	105197164	105288460	22	2	1	rs2441901	1	rs2441901
893	rs4734825	8	105878647	5.53815e-49	105858624	105878647	2	1	1	rs4734825	1	rs4734825
894	rs10086269	8	108140601	8.82719e-46	107961577	108278136	82	3	3	rs3019959;rs10086269;rs11781826	3	rs3019959;rs10086269;rs11781826
895	rs420029	8	109108609	4.29464e-61	109081660	109566235	61	3	2	rs420029;rs4490804	1	rs420029
896	rs12680896	8	109848796	1.8734e-10	109848796	109866553	3	1	1	rs12680896	1	rs12680896
897	rs3133969	8	110752859	6.59461e-147	110728036	110752859	5	1	1	rs3133969	1	rs3133969
898	rs7008236	8	111753477	2.40069e-10	111619100	111757431	22	1	1	rs7008236	1	rs7008236
899	rs80336545	8	115228399	2.9634e-88	115028048	115346872	70	1	1	rs80336545	1	rs80336545
900	rs28710773	8	116242756	3.1407e-18	116199179	116246301	14	1	1	rs28710773	1	rs28710773
901	rs11787376	8	119784816	2.55594e-35	119784816	119784816	1	1	1	rs11787376	1	rs11787376
902	rs6469893	8	121045000	9.299e-12	120997766	121045320	8	1	1	rs6469893	1	rs6469893
903	rs6470066	8	123182956	9.28049e-21	123169233	123207724	14	1	1	rs6470066	1	rs6470066
904	rs4412351	8	125102535	3.287e-67	125052508	125120586	21	1	1	rs4412351	1	rs4412351
905	rs57244622	8	125909980	1.09785e-157	125909470	125913612	18	16	1	rs57244622	1	rs57244622
906	rs13254738	8	128104343	9.37687e-09	128099455	128104343	5	1	1	rs13254738	1	rs13254738
907	rs4733806	8	128909539	1.45538e-155	128909539	129106308	7	2	2	rs4733806;rs2648901	2	rs4733806;rs2648901
908	rs16904256	8	131384143	1.96014e-28	130827576	131403188	19	2	2	rs451860;rs16904256	2	rs451860;rs16904256
909	rs2673565	8	133466344	4.91255e-13	133466344	133466344	1	1	1	rs2673565	1	rs2673565
910	rs6983255	8	134484365	3.4645e-51	134484365	134646116	6	5	3	rs6983255;rs11776567;rs6471139	3	rs6983255;rs11776567;rs6471139
911	rs733961	8	137059754	3.40066e-15	137027349	137084746	28	1	1	rs733961	1	rs733961
912	rs2587848	8	137553766	5.64698e-22	137552803	137674085	19	2	1	rs2587848	1	rs2587848
913	rs7832832	8	140158651	1.17449e-102	140111880	140643572	61	5	5	rs7832832;rs11166882;rs16910506;rs2545452;rs11783497	4	rs7832832;rs16910506;rs2545452;rs11783497
914	rs12550260	8	141274461	1.14873e-89	141259744	141277175	18	2	1	rs12550260	1	rs12550260
915	rs7844001	8	143013960	2.52529e-11	143010086	143033888	8	1	1	rs7844001	1	rs7844001
916	rs10815034	9	469767	7.82461e-58	468170	469767	3	1	1	rs10815034	1	rs10815034
917	rs16924776	9	845564	3.2857e-10	845564	862289	10	1	1	rs16924776	1	rs16924776
918	rs10974252	9	3947262	1.61231e-18	3925604	3947262	2	1	1	rs10974252	1	rs10974252
919	rs4486258	9	6806946	1.57854e-62	6748447	6806946	8	8	1	rs4486258	1	rs4486258
920	rs10815946	9	8782785	4.65136e-11	8782785	8782785	1	1	1	rs10815946	1	rs10815946
921	rs73641257	9	9201399	2.54246e-39	9201399	9201399	1	1	1	rs73641257	1	rs73641257
922	rs2821463	9	9739629	1.45696e-11	9719553	9751606	20	1	1	rs2821463	1	rs2821463
923	rs10959122	9	10492397	1.70984e-55	10492397	10492397	1	1	1	rs10959122	1	rs10959122
924	rs10959798	9	11432615	1.0939e-54	10968023	11989302	136	5	3	rs73641386;rs10959798;rs7039047	2	rs73641386;rs10959798
925	rs16929627	9	12820965	1e-200	12800532	12820965	2	1	1	rs16929627	1	rs16929627
926	rs62539783	9	15213516	7.08534e-16	15205462	15213516	2	1	1	rs62539783	1	rs62539783
927	rs770210	9	15887931	1.02554e-55	15850916	15990379	53	1	1	rs770210	1	rs770210
928	rs34150222	9	19313913	2.19267e-35	19225895	19392428	21	1	1	rs34150222	1	rs34150222
929	rs7030584	9	20045511	5.04383e-20	20044650	20080426	7	1	1	rs7030584	1	rs7030584
930	rs4977860	9	20969148	7.5005e-48	20829416	21029330	33	1	1	rs4977860	1	rs4977860
931	rs4313236	9	22610531	1e-200	21996623	22646991	113	27	5	rs1333046;rs62556547;rs634537;rs943394;rs4313236	3	rs1333046;rs943394;rs4313236
932	rs58738956	9	22998209	5.88007e-180	22998209	22998209	1	1	1	rs58738956	1	rs58738956
933	rs4592115	9	25649187	6.01481e-13	25633739	25656492	6	1	1	rs4592115	1	rs4592115
934	rs7867403	9	26457404	4.60078e-113	26457404	26457404	1	1	1	rs7867403	1	rs7867403
935	rs10812722	9	28010134	2.07054e-13	28009353	28027671	14	1	1	rs10812722	1	rs10812722
936	rs13294341	9	29479296	1e-200	29246945	29479296	4	2	2	rs1928664;rs13294341	2	rs1928664;rs13294341
937	rs4357381	9	30248450	3.57128e-30	30144785	30407554	42	1	1	rs4357381	1	rs4357381
938	rs1329585	9	32317994	5.31871e-51	31631132	32324284	67	4	3	rs72717584;rs7041750;rs1329585	3	rs72717584;rs7041750;rs1329585
939	rs72709635	9	33522676	1.00105e-09	33466844	33523922	13	1	1	rs72709635	1	rs72709635
940	rs10971827	9	33972467	2.13335e-13	33785073	34420990	113	3	2	rs10971827;rs10971969	1	rs10971827
941	rs80168305	9	36973065	1e-200	36969169	36973082	4	1	1	rs80168305	1	rs80168305
942	rs872077	9	71624695	2.84446e-39	71624695	71624695	1	1	1	rs872077	1	rs872077
943	rs1927098	9	72835205	4.50866e-09	72769965	72983864	47	1	1	rs1927098	1	rs1927098
944	rs9792446	9	73490171	2.64841e-09	73490171	73491230	3	1	1	rs9792446	1	rs9792446
945	rs4745156	9	74690404	1.24954e-23	74682345	74693939	12	1	1	rs4745156	1	rs4745156
946	rs970386	9	75226846	2.96045e-25	75137069	75288219	37	9	1	rs970386	1	rs970386
947	rs4483218	9	76758064	1.25523e-95	76748565	76926383	57	2	2	rs4483218;rs4745293	2	rs4483218;rs4745293
948	rs62558821	9	78651919	1.72489e-11	78651919	78651919	1	1	1	rs62558821	1	rs62558821
949	rs9411164	9	78910139	2.63294e-08	78902899	78910139	4	1	1	rs9411164	1	rs9411164
950	rs786320	9	79236165	7.74801e-32	79236165	79242215	2	1	1	rs786320	1	rs786320
951	rs7848962	9	79679676	7.80951e-107	79657746	79706182	13	1	1	rs7848962	1	rs7848962
952	rs7024798	9	80534063	8.8589e-77	80534063	80831743	59	2	2	rs7024798;rs78692129	2	rs7024798;rs78692129
953	rs55985824	9	81412908	7.84919e-14	81412908	81412908	1	1	1	rs55985824	1	rs55985824
954	rs1929910	9	83311763	1.66616e-22	82944635	83440055	36	2	2	rs140103714;rs1929910	2	rs140103714;rs1929910
955	rs10746715	9	86205804	1e-200	86196020	86859797	59	3	3	rs10746715;rs139437479;rs11140466	3	rs10746715;rs139437479;rs11140466
956	rs12554240	9	89885028	1e-200	89671275	90039306	20	7	3	rs4878038;rs12554240;rs2183939	3	rs4878038;rs12554240;rs2183939
957	rs10820939	9	94851058	1e-200	94600630	94877716	166	3	3	rs10123678;rs75745017;rs10820939	2	rs10123678;rs10820939
958	rs112799769	9	96122167	1.08012e-31	96071408	96148381	22	1	1	rs112799769	1	rs112799769
959	rs2404693	9	98162994	1.35896e-15	98162994	98178895	2	1	1	rs2404693	1	rs2404693
960	rs1330187	9	103711370	2.43267e-37	103547542	103769058	61	1	1	rs1330187	1	rs1330187
961	rs9299375	9	106529709	1.96737e-10	106501650	106570159	28	1	1	rs9299375	1	rs9299375
962	rs10820676	9	107363792	4.39417e-10	107341915	107467952	59	3	1	rs10820676	1	rs10820676
963	rs976575	9	109649778	4.14098e-21	109610587	109649778	3	1	1	rs976575	1	rs976575
964	rs3818932	9	111664178	9.11235e-45	111661422	111931100	20	1	1	rs3818932	1	rs3818932
965	rs1330848	9	112322087	9.78709e-31	112288618	112322087	7	1	1	rs1330848	1	rs1330848
966	rs4415391	9	113480169	2.3161e-26	113480169	113480169	1	1	1	rs4415391	1	rs4415391
967	rs10982367	9	117436258	2.62599e-21	117032340	117457917	20	3	3	rs1490741;rs7028602;rs10982367	3	rs1490741;rs7028602;rs10982367
968	rs62578427	9	117835096	1.04684e-10	117792260	117839761	13	1	1	rs62578427	1	rs62578427
969	rs6478239	9	119244954	1.54042e-19	119240135	119481253	68	2	2	rs6478239;rs57557118	2	rs6478239;rs57557118
970	rs10818117	9	120921427	9.47364e-13	120733531	120939332	14	2	2	rs10818117;rs62571747	1	rs10818117
971	rs4300063	9	121384794	1.80385e-08	121380681	121440507	33	27	1	rs4300063	1	rs4300063
972	rs885150	9	124420173	2.35547e-15	124411497	124420173	7	2	1	rs885150	1	rs885150
973	rs10123645	9	125312319	2.90288e-10	125275805	125314365	10	1	1	rs10123645	1	rs10123645
974	rs10117812	9	128251025	7.34873e-13	127820380	128265228	50	4	2	rs59842227;rs10117812	2	rs59842227;rs10117812
975	rs2416993	9	128797551	4.59134e-08	128797551	128797551	1	1	1	rs2416993	1	rs2416993
976	rs7869023	9	130201678	5.48165e-26	130170158	130289231	49	1	1	rs7869023	1	rs7869023
977	rs870451	9	130937738	5.00387e-12	130909681	130969168	18	1	1	rs870451	1	rs870451
978	rs2298045	9	131403096	1.72775e-20	131332609	131424687	20	1	1	rs2298045	1	rs2298045
979	rs62579976	9	133361191	5.67874e-16	133357713	133370847	8	2	2	rs62579976;rs553696	2	rs62579976;rs553696
980	rs1557678	9	136715121	1.84027e-33	136618314	136736562	22	2	2	rs521446;rs1557678	2	rs521446;rs1557678
981	rs10858379	9	138181507	2.62353e-52	138181507	138181507	1	1	1	rs10858379	1	rs10858379
982	rs2784096	9	139789057	2.03488e-107	139743636	139829741	34	2	1	rs2784096	1	rs2784096
983	rs2813410	10	1517191	2.33194e-169	1517191	1517191	1	1	1	rs2813410	1	rs2813410
984	rs7094797	10	3770014	1.0252e-14	3546805	3770014	16	2	2	rs7094903;rs7094797	2	rs7094903;rs7094797
985	rs72778418	10	4308241	5.18998e-17	4308241	4308241	1	1	1	rs72778418	1	rs72778418
986	rs11598876	10	6159712	2.71147e-27	6159712	6182642	5	1	1	rs11598876	1	rs11598876
987	rs946792	10	7031033	8.48424e-117	7028695	7037780	7	1	1	rs946792	1	rs946792
988	rs11812109	10	7730983	2.69116e-53	7727948	7996675	22	2	2	rs11812109;rs4749316	2	rs11812109;rs4749316
989	rs11255807	10	8709769	1.40693e-13	8694774	8772234	35	1	1	rs11255807	1	rs11255807
990	rs7919439	10	9764384	3.08496e-165	9764384	9818301	4	1	1	rs7919439	1	rs7919439
991	rs61835709	10	10524916	4.64261e-27	10523202	10534425	4	1	1	rs61835709	1	rs61835709
992	rs2150044	10	11121238	1.28298e-08	11091085	11121238	2	1	1	rs2150044	1	rs2150044
993	rs7908515	10	13201887	7.45294e-12	13156761	13205773	17	1	1	rs7908515	1	rs7908515
994	rs72784927	10	14562201	3.29543e-24	14562201	14618528	6	1	1	rs72784927	1	rs72784927
995	rs7085819	10	15013308	3.22176e-62	14982312	15240556	30	3	2	rs7085819;rs11259541	2	rs7085819;rs11259541
996	rs2184383	10	16376270	1e-200	16364752	16385336	6	1	1	rs2184383	1	rs2184383
997	rs7901548	10	17484620	2.11116e-14	17471996	17501329	9	1	1	rs7901548	1	rs7901548
998	rs57795290	10	18992509	1.20254e-33	18992509	19116171	10	2	2	rs57795290;rs2480316	2	rs57795290;rs2480316
999	rs34411637	10	26149860	2.69486e-17	26087066	26393795	91	2	2	rs34411637;rs72795806	2	rs34411637;rs72795806
1000	rs11015570	10	27434968	1.4532e-08	27297441	27536232	120	75	1	rs11015570	1	rs11015570
1001	rs10763675	10	29211930	1.1706e-37	29209950	29253181	11	1	1	rs10763675	1	rs10763675
1002	rs2505084	10	30335520	1.58687e-08	30327735	30335520	3	2	1	rs2505084	1	rs2505084
1003	rs10763787	10	30700753	3.41226e-38	30693252	30773731	26	1	1	rs10763787	1	rs10763787
1004	rs9338708	10	32752511	8.70097e-09	32752511	33048458	22	1	1	rs9338708	1	rs9338708
1005	rs55696830	10	33477953	1.19747e-91	33477953	33513476	30	1	1	rs55696830	1	rs55696830
1006	rs593426	10	35905584	2.1419e-10	35879214	35907392	8	2	1	rs593426	1	rs593426
1007	rs116146007	10	37046307	8.23753e-20	37043328	37046307	4	1	1	rs116146007	1	rs116146007
1008	rs879379	10	43481455	5.80058e-96	43465021	43575872	6	2	2	rs879379;rs1864409	2	rs879379;rs1864409
1009	rs3006381	10	44046172	6.79203e-24	44017956	44100524	28	1	1	rs3006381	1	rs3006381
1010	rs915083	10	44755406	1.77947e-30	44485575	44781234	73	19	2	rs915083;rs1032408	1	rs915083
1011	rs11599504	10	53596241	4.70005e-84	53596241	53596241	1	1	1	rs11599504	1	rs11599504
1012	rs11003411	10	54902351	9.88722e-11	54892158	54930366	7	1	1	rs11003411	1	rs11003411
1013	rs4935101	10	55859477	4.82777e-22	55842553	55867198	19	11	1	rs4935101	1	rs4935101
1014	rs2250775	10	56840255	1.14672e-38	56840188	56882946	16	1	1	rs2250775	1	rs2250775
1015	rs7895723	10	57179890	3.11329e-13	57140023	57185433	15	1	1	rs7895723	1	rs7895723
1016	rs10825865	10	58500113	9.11243e-18	58397900	58543143	55	1	1	rs10825865	1	rs10825865
1017	rs10763527	10	59738121	7.40486e-46	59729004	59744504	32	1	1	rs10763527	1	rs10763527
1018	rs3910875	10	60726436	1.14859e-13	60726436	60741285	2	1	1	rs3910875	1	rs3910875
1019	rs11006522	10	61234089	3.08579e-10	61132145	61234089	19	1	1	rs11006522	1	rs11006522
1020	rs10994080	10	61702632	4.10695e-47	61555229	61888113	27	2	2	rs10994080;rs72820428	2	rs10994080;rs72820428
1021	rs76762467	10	62250984	3.65593e-65	62202220	62311027	100	79	1	rs76762467	1	rs76762467
1022	rs78472863	10	62619164	1.73834e-71	62615143	62623759	12	2	1	rs78472863	1	rs78472863
1023	rs16915963	10	63039856	1.19257e-50	63035330	63039856	2	1	1	rs16915963	1	rs16915963
1024	rs224064	10	64504212	9.70451e-15	64464971	64539921	20	1	1	rs224064	1	rs224064
1025	rs2578022	10	65845866	4.55532e-18	65823099	65920924	22	2	1	rs2578022	1	rs2578022
1026	rs56337921	10	66906970	8.7561e-82	66906970	66960170	5	1	1	rs56337921	1	rs56337921
1027	rs7088794	10	67769615	2.49243e-26	67769615	67970573	5	2	2	rs7088794;rs10996977	2	rs7088794;rs10996977
1028	rs78519668	10	69392305	2.21456e-29	69381506	69552077	41	1	1	rs78519668	1	rs78519668
1029	rs7916778	10	70417863	1.1064e-130	70332862	70603804	132	54	2	rs7916778;rs1162959	1	rs7916778
1030	rs2252256	10	71445355	3.52293e-57	71423968	71447620	9	3	2	rs2812511;rs2252256	2	rs2812511;rs2252256
1031	rs11816645	10	72442672	1.29986e-23	72430635	72446296	11	1	1	rs11816645	1	rs11816645
1032	rs61853675	10	73570889	4.53251e-29	73570889	73570889	1	1	1	rs61853675	1	rs61853675
1033	rs6480723	10	75966366	3.33537e-68	75875145	76394197	64	2	1	rs6480723	1	rs6480723
1034	rs34926990	10	80098916	1e-200	80098121	80174576	12	1	1	rs34926990	1	rs34926990
1035	rs2224109	10	83734145	1.13412e-08	83689125	83757623	8	1	1	rs2224109	1	rs2224109
1036	rs1419268	10	85725305	1e-200	85725305	85725305	1	1	1	rs1419268	1	rs1419268
1037	rs66962771	10	87315425	1e-200	87315377	87352041	6	1	1	rs66962771	1	rs66962771
1038	rs10400177	10	88193911	4.93271e-39	88163336	88430662	47	2	2	rs10400177;rs2244769	1	rs10400177
1039	rs11185864	10	91499869	1.88367e-99	91401407	91571318	71	3	1	rs11185864	1	rs11185864
1040	rs4933564	10	91937734	8.98836e-19	91913119	91945576	13	1	1	rs4933564	1	rs4933564
1041	rs7920520	10	93969270	7.54707e-10	93969270	93984607	2	1	1	rs7920520	1	rs7920520
1042	rs35038192	10	95750068	8.89422e-132	95745340	95767627	8	1	1	rs35038192	1	rs35038192
1043	rs2860840	10	96495232	1.26079e-11	96147240	96604211	10	1	1	rs2860840	1	rs2860840
1044	rs11188395	10	97365622	2.33426e-12	97340559	97448172	18	1	1	rs11188395	1	rs11188395
1045	rs10786370	10	99499822	9.15918e-105	98978183	99980127	112	11	6	rs10786326;rs12359257;rs933057;rs10786370;rs1078303;rs10883035	6	rs10786326;rs12359257;rs933057;rs10786370;rs1078303;rs10883035
1046	rs2094120	10	105223759	3.05128e-23	104520277	105234206	53	6	2	rs1004467;rs2094120	2	rs1004467;rs2094120
1047	rs12571440	10	107733803	7.58969e-26	107680025	107735093	6	1	1	rs12571440	1	rs12571440
1048	rs11193816	10	109721673	5.51106e-50	109406235	109739349	64	2	2	rs2246097;rs11193816	2	rs2246097;rs11193816
1049	rs61867693	10	110387148	5.5021e-12	110381995	110456088	11	1	1	rs61867693	1	rs61867693
1050	rs11194511	10	111008513	8.84288e-57	110772514	111187181	157	7	3	rs7897481;rs11194511;rs12253246	3	rs7897481;rs11194511;rs12253246
1051	rs11195931	10	114125810	7.09283e-16	114125810	114138656	3	1	1	rs11195931	1	rs11195931
1052	rs35198068	10	114754784	1.107e-27	114746580	114821527	76	68	3	rs35198068;rs7900150;rs61872790	1	rs35198068
1053	rs2532834	10	119085744	2.44653e-24	119028094	119148641	44	1	1	rs2532834	1	rs2532834
1054	rs61864383	10	119795092	3.45514e-51	119731546	119861686	12	1	1	rs61864383	1	rs61864383
1055	rs2289337	10	122649482	1.32505e-102	122557628	122718162	32	1	1	rs2289337	1	rs2289337
1056	rs7071884	10	125594966	5.47632e-13	125594966	125617158	2	1	1	rs7071884	1	rs7071884
1057	rs111393855	10	126136465	1.90437e-22	126124882	126138803	17	11	1	rs111393855	1	rs111393855
1058	rs12217961	10	127834338	3.60359e-78	127219324	127849724	72	3	3	rs2365802;rs7474918;rs12217961	3	rs2365802;rs7474918;rs12217961
1059	rs1416718	10	130161888	1.97893e-28	130125558	130295563	11	2	2	rs1416718;rs11016272	2	rs1416718;rs11016272
1060	rs12220782	10	131485205	2.34756e-152	131286199	131621711	20	3	3	rs12256432;rs12220782;rs10764917	3	rs12256432;rs12220782;rs10764917
1061	rs74162636	10	132308426	2.14928e-13	132301220	132330483	7	2	1	rs74162636	1	rs74162636
1062	rs1073868	10	132709255	2.48961e-11	132709255	132718562	3	1	1	rs1073868	1	rs1073868
1063	rs2275723	10	135139635	1.91173e-142	135074691	135151925	23	1	1	rs2275723	1	rs2275723
1064	rs74045622	11	1049989	7.69993e-123	918837	1058179	12	1	1	rs74045622	1	rs74045622
1065	rs10766332	11	1386835	1.76327e-83	1349860	1398807	25	5	2	rs10766332;rs10832858	2	rs10766332;rs10832858
1066	rs34972605	11	1721982	4.04353e-12	1721982	1721982	1	1	1	rs34972605	1	rs34972605
1067	rs7126629	11	2228952	2.40598e-13	2225709	2233495	11	1	1	rs7126629	1	rs7126629
1068	rs1451656	11	4431543	1.28901e-110	4423518	4434514	5	1	1	rs1451656	1	rs1451656
1069	rs7131535	11	6250343	5.64959e-10	6230403	6282970	9	1	1	rs7131535	1	rs7131535
1070	rs11041979	11	8578941	1.75187e-08	8400326	8682465	243	178	1	rs11041979	1	rs11041979
1071	rs491205	11	9767559	1.52961e-08	9751874	9777699	11	1	1	rs491205	1	rs491205
1072	rs10831788	11	12349076	2.4265e-13	12349076	12623749	6	2	2	rs10831788;rs10831864	2	rs10831788;rs10831864
1073	rs4756755	11	13158471	1.99089e-74	13154818	13162501	11	1	1	rs4756755	1	rs4756755
1074	rs7120652	11	13677490	2.94218e-10	13630275	13756112	58	1	1	rs7120652	1	rs7120652
1075	rs1108010	11	15216692	1.67745e-92	15216692	15225367	7	1	1	rs1108010	1	rs1108010
1076	rs4275630	11	23379699	2.22549e-13	23309405	23393948	43	1	1	rs4275630	1	rs4275630
1077	rs61875577	11	24504919	1.55572e-165	24421988	24504919	14	1	1	rs61875577	1	rs61875577
1078	rs2631493	11	24853023	3.86304e-30	24851655	24892052	37	1	1	rs2631493	1	rs2631493
1079	rs34699441	11	25843026	1.50106e-29	25837371	25939284	38	2	1	rs34699441	1	rs34699441
1080	rs117824214	11	26538067	4.37015e-10	26502263	26550679	14	1	1	rs117824214	1	rs117824214
1081	rs11029826	11	27098784	4.78114e-63	27093635	27146120	14	1	1	rs11029826	1	rs11029826
1082	rs4923477	11	27805122	9.9912e-12	27805122	27845147	14	1	1	rs4923477	1	rs4923477
1083	rs11524413	11	29070144	9.47122e-128	28823691	29091612	73	2	1	rs11524413	1	rs11524413
1084	rs35176275	11	32533221	1e-200	32385255	32544546	36	2	2	rs3847589;rs35176275	2	rs3847589;rs35176275
1085	rs7120623	11	33062565	5.51378e-24	33050568	33240838	48	1	1	rs7120623	1	rs7120623
1086	rs3920862	11	34795679	1.21818e-166	34673520	35321263	139	79	3	rs3920862;rs2732523;rs3847606	3	rs3920862;rs2732523;rs3847606
1087	rs7129486	11	37317593	1.33946e-75	37243589	37333829	31	1	1	rs7129486	1	rs7129486
1088	rs11035202	11	39293416	1.23528e-60	39282254	39320156	32	27	1	rs11035202	1	rs11035202
1089	rs11035794	11	40370881	9.47579e-09	40370881	40375879	3	1	1	rs11035794	1	rs11035794
1090	rs35501428	11	45076640	2.50806e-92	45076284	45081720	9	1	1	rs35501428	1	rs35501428
1091	rs61896133	11	47115719	1.06654e-66	46704682	47222643	59	2	2	rs61896133;rs3136441	1	rs61896133
1092	rs9783302	11	49002343	1.34912e-24	48145375	49127586	288	10	1	rs9783302	1	rs9783302
1093	rs7104814	11	58045080	5.71895e-10	57991852	58431776	83	2	2	rs7104814;rs2510867	2	rs7104814;rs2510867
1094	rs11607526	11	59166402	6.0757e-32	59046617	59234110	170	1	1	rs11607526	1	rs11607526
1095	rs539360	11	59839682	4.18473e-12	59835799	59854269	10	3	1	rs539360	1	rs539360
1096	rs56402676	11	69835887	2.9251e-94	69835549	69835887	2	1	1	rs56402676	1	rs56402676
1097	rs3020093	11	70751980	2.27876e-18	70751276	70799431	20	1	1	rs3020093	1	rs3020093
1098	rs72985967	11	74222312	2.12923e-09	74185204	74324824	10	1	1	rs72985967	1	rs72985967
1099	rs111845518	11	75294591	2.14541e-16	75294591	75294591	1	1	1	rs111845518	1	rs111845518
1100	rs57441863	11	76524940	2.04784e-107	76518705	76544038	10	1	1	rs57441863	1	rs57441863
1101	rs12286317	11	77389020	1e-200	77246426	77687001	57	1	1	rs12286317	1	rs12286317
1102	rs7125940	11	80932427	7.39845e-11	80932427	80944426	11	1	1	rs7125940	1	rs7125940
1103	rs672865	11	82965098	1.43766e-96	82934026	83118804	36	3	1	rs672865	1	rs672865
1104	rs117757936	11	84477316	1.70951e-22	84399085	84533012	25	10	1	rs117757936	1	rs117757936
1105	rs645798	11	85313065	1.78334e-13	84898105	85339380	16	10	1	rs645798	1	rs645798
1106	rs112356887	11	85767053	3.14753e-10	85622518	85826357	31	1	1	rs112356887	1	rs112356887
1107	rs603874	11	87829030	2.03434e-130	87829030	87940333	10	2	2	rs603874;rs11018814	2	rs603874;rs11018814
1108	rs73538844	11	91840009	8.79366e-26	91826710	91937260	17	1	1	rs73538844	1	rs73538844
1109	rs12420783	11	93997886	4.8091e-66	93917035	93999735	6	1	1	rs12420783	1	rs12420783
1110	rs10831255	11	94361703	2.98927e-28	94358815	94377612	7	1	1	rs10831255	1	rs10831255
1111	rs12800727	11	95758622	6.47958e-96	95731342	95758622	7	1	1	rs12800727	1	rs12800727
1112	rs1866534	11	96576270	8.98809e-58	96536402	96578199	9	1	1	rs1866534	1	rs1866534
1113	rs11213783	11	97919121	2.27284e-86	97919121	97919121	1	1	1	rs11213783	1	rs11213783
1114	rs3018594	11	98505208	6.31849e-18	98456290	98747015	45	3	3	rs67365608;rs3018594;rs1948095	3	rs67365608;rs3018594;rs1948095
1115	rs10790789	11	99411774	6.12308e-27	99397691	99415125	11	6	1	rs10790789	1	rs10790789
1116	rs12420598	11	99755777	1.60317e-17	99755777	99755777	1	1	1	rs12420598	1	rs12420598
1117	rs614615	11	100669925	6.03132e-47	100650251	100677605	9	1	1	rs614615	1	rs614615
1118	rs61904829	11	103352262	1.99922e-64	103155270	103643692	90	6	2	rs61904829;rs11225990	2	rs61904829;rs11225990
1119	rs59052534	11	106790674	2.25925e-59	106666785	106790674	9	1	1	rs59052534	1	rs59052534
1120	rs10890702	11	107180885	1.50197e-22	107117691	107339155	225	170	1	rs10890702	1	rs10890702
1121	rs11212992	11	109096368	6.08398e-13	109078807	109096368	2	1	1	rs11212992	1	rs11212992
1122	rs7944752	11	109405386	1e-200	109399023	109443005	6	1	1	rs7944752	1	rs7944752
1123	rs2715791	11	113683860	1e-200	113457512	113786568	57	2	1	rs2715791	1	rs2715791
1124	rs11569688	11	114183443	3.93587e-49	114176643	114565568	27	3	3	rs11569688;rs10790025;rs1612404	3	rs11569688;rs10790025;rs1612404
1125	rs11215786	11	115969151	1e-200	115969089	115969797	5	1	1	rs11215786	1	rs11215786
1126	rs59414734	11	116347944	4.53106e-12	116341366	116348805	6	1	1	rs59414734	1	rs59414734
1127	rs60652614	11	118168543	5.95669e-33	118145940	118202032	18	2	1	rs60652614	1	rs60652614
1128	rs6589825	11	120509726	3.94987e-22	120509192	120524884	5	1	1	rs6589825	1	rs6589825
1129	rs4935892	11	124581323	3.13512e-48	124571520	124587234	11	1	1	rs4935892	1	rs4935892
1130	rs2874374	11	125073691	9.00927e-09	125073691	125106293	12	1	1	rs2874374	1	rs2874374
1131	rs11221577	11	129011327	3.20596e-23	128896857	129126209	12	1	1	rs11221577	1	rs11221577
1132	rs9630202	11	131971337	1e-200	131920593	131990017	12	1	1	rs9630202	1	rs9630202
1133	rs1876282	11	132761853	6.77918e-69	132761853	132989139	8	2	2	rs1876282;rs11223367	2	rs1876282;rs11223367
1134	rs73048564	11	134915316	1.23587e-40	134604912	134925451	58	2	2	rs7130741;rs73048564	2	rs7130741;rs73048564
1135	rs61459653	12	238648	3.2338e-15	238648	239844	2	1	1	rs61459653	1	rs61459653
1136	rs12424289	12	4349614	3.21758e-09	4340724	4349614	4	1	1	rs12424289	1	rs12424289
1137	rs11063452	12	5107548	3.87289e-10	5100818	5122498	13	5	1	rs11063452	1	rs11063452
1138	rs11063613	12	5419035	7.33679e-38	5419035	5587642	7	2	2	rs11063613;rs34916342	2	rs11063613;rs34916342
1139	rs16917905	12	9087866	1.06879e-14	9087866	9087866	1	1	1	rs16917905	1	rs16917905
1140	rs4763299	12	9904449	1e-200	9901520	9910720	6	1	1	rs4763299	1	rs4763299
1141	rs11053549	12	10172178	5.57986e-11	10172178	10175667	3	1	1	rs11053549	1	rs11053549
1142	rs1993498	12	10798615	3.29967e-13	10777805	10816379	22	1	1	rs1993498	1	rs1993498
1143	rs7310233	12	11145923	4.40849e-25	11137673	11350385	74	1	1	rs7310233	1	rs7310233
1144	rs4307768	12	14580689	4.17094e-24	14488402	14647418	39	1	1	rs4307768	1	rs4307768
1145	rs16911478	12	16150512	1.63837e-12	16150512	16150512	1	1	1	rs16911478	1	rs16911478
1146	rs75578613	12	19957366	5.72969e-161	19838633	19983345	22	3	2	rs4762667;rs75578613	2	rs4762667;rs75578613
1147	rs1871145	12	21706282	7.67658e-51	21686028	21718747	29	1	1	rs1871145	1	rs1871145
1148	rs73080482	12	22804193	4.3822e-24	22779360	22863384	41	14	1	rs73080482	1	rs73080482
1149	rs17395631	12	23888223	2.89201e-22	23876513	23890178	5	1	1	rs17395631	1	rs17395631
1150	rs2619483	12	25702667	5.3766e-102	25540874	25703144	36	2	2	rs12230608;rs2619483	2	rs12230608;rs2619483
1151	rs73090874	12	26374615	2.12855e-185	26361800	26386290	10	1	1	rs73090874	1	rs73090874
1152	rs4963688	12	27432385	1e-200	27411902	27522232	13	1	1	rs4963688	1	rs4963688
1153	rs12371222	12	28516178	6.21507e-09	28263852	28740649	171	5	1	rs12371222	1	rs12371222
1154	rs4931163	12	29347848	1.49639e-102	29034892	29388570	29	4	3	rs11049949;rs4931163;rs11050146	2	rs11049949;rs4931163
1155	rs1259441	12	31690311	1.86567e-15	31520010	31769501	32	1	1	rs1259441	1	rs1259441
1156	rs2594013	12	32298216	2.50479e-12	32251580	32543885	92	45	2	rs2594013;rs77943489	2	rs2594013;rs77943489
1157	rs12426021	12	38322587	4.19882e-40	37856814	39015336	335	2	1	rs12426021	1	rs12426021
1158	rs55649806	12	40907593	1.9431e-33	40839601	41003494	28	1	1	rs55649806	1	rs55649806
1159	rs12313532	12	41867868	5.05137e-69	41841694	42025586	21	5	2	rs12313532;rs286982	2	rs12313532;rs286982
1160	rs59259158	12	43054312	1e-200	43047406	43054312	4	1	1	rs59259158	1	rs59259158
1161	rs1877261	12	51657636	1.50763e-128	51619411	51731722	26	1	1	rs1877261	1	rs1877261
1162	rs7965111	12	54061357	3.58148e-65	54015572	54092021	12	1	1	rs7965111	1	rs7965111
1163	rs1623481	12	55000973	9.4654e-09	54986617	55002670	14	1	1	rs1623481	1	rs1623481
1164	rs7305643	12	58609584	1.08317e-24	58585772	58751017	19	3	2	rs7305643;rs17120607	2	rs7305643;rs17120607
1165	rs61923783	12	61172147	3.1366e-22	60881151	61447424	64	2	2	rs61923783;rs12297083	2	rs61923783;rs12297083
1166	rs7979223	12	62148127	2.87137e-73	61976164	62669758	79	5	4	rs7979223;rs12423666;rs112696980;rs10784289	4	rs7979223;rs12423666;rs112696980;rs10784289
1167	rs11612273	12	65707858	1.03017e-21	65451377	65837570	33	1	1	rs11612273	1	rs11612273
1168	rs10784523	12	66697400	2.72237e-33	66656827	66698076	20	1	1	rs10784523	1	rs10784523
1169	rs10506515	12	67298018	1.05343e-152	67296901	67336068	24	6	1	rs10506515	1	rs10506515
1170	rs2906850	12	68344212	3.72859e-12	68329410	68348975	5	1	1	rs2906850	1	rs2906850
1171	rs2227480	12	68648342	6.88369e-144	68646773	68664716	5	1	1	rs2227480	1	rs2227480
1172	rs4761246	12	69992448	1.96106e-54	69618426	70006216	58	2	2	rs12819406;rs4761246	2	rs12819406;rs4761246
1173	rs74647589	12	70463875	6.89146e-18	70389226	70813585	49	6	1	rs74647589	1	rs74647589
1174	rs2731579	12	74065495	1.16535e-10	74035901	74076403	15	1	1	rs2731579	1	rs2731579
1175	rs1517735	12	76580497	7.56903e-31	76580497	76692325	7	2	2	rs1517735;rs7955145	2	rs1517735;rs7955145
1176	rs1491043	12	77970694	1.64184e-79	77895969	78222875	14	2	2	rs1491043;rs60232238	2	rs1491043;rs60232238
1177	rs2248728	12	82418382	6.71989e-57	82399623	82418382	3	1	1	rs2248728	1	rs2248728
1178	rs10745495	12	89554610	1.82693e-09	89505448	89628810	5	1	1	rs10745495	1	rs10745495
1179	rs10777200	12	90172940	4.6758e-11	90138012	90228900	27	1	1	rs10777200	1	rs10777200
1180	rs10858961	12	90525851	1e-200	90483716	90952164	35	2	2	rs10858961;rs7300177	2	rs10858961;rs7300177
1181	rs112250173	12	94952025	5.73371e-63	94945166	94963611	5	1	1	rs112250173	1	rs112250173
1182	rs6538742	12	97203085	1e-200	97075110	97357629	97	71	1	rs6538742	1	rs6538742
1183	rs61932197	12	99362581	1e-200	99362581	99369426	6	1	1	rs61932197	1	rs61932197
1184	rs17401978	12	101212470	8.1236e-66	101212470	101212896	3	1	1	rs17401978	1	rs17401978
1185	rs10860930	12	103237958	8.9348e-17	103215104	103324148	24	1	1	rs10860930	1	rs10860930
1186	rs11111854	12	104345253	2.25129e-08	104324525	104361606	5	1	1	rs11111854	1	rs11111854
1187	rs73197538	12	106747592	5.51846e-13	106701523	106944053	136	65	2	rs73197538;rs10778472	2	rs73197538;rs10778472
1188	rs2204830	12	107527163	3.98532e-10	107527163	107527163	1	1	1	rs2204830	1	rs2204830
1189	rs11114074	12	109260526	1.62685e-136	109138356	109260526	21	2	1	rs11114074	1	rs11114074
1190	rs6606680	12	110448256	6.07415e-53	110374137	111006182	6	1	1	rs6606680	1	rs6606680
1191	rs11065987	12	112072424	2.52518e-17	111756403	112918359	241	15	4	rs11065987;rs4767293;rs7978923;rs2301622	1	rs11065987
1192	rs12827073	12	114459372	7.0728e-123	114166550	114461559	19	3	3	rs4447219;rs7977045;rs12827073	3	rs4447219;rs7977045;rs12827073
1193	rs7302905	12	115244373	2.63666e-14	115225774	115244373	2	1	1	rs7302905	1	rs7302905
1194	rs10774818	12	116009509	1.70844e-16	116009509	116013371	2	1	1	rs10774818	1	rs10774818
1195	rs4767427	12	117065371	3.4562e-32	117055615	117073312	13	5	1	rs4767427	1	rs4767427
1196	rs1111578	12	117913256	4.28327e-19	117913256	117913256	1	1	1	rs1111578	1	rs1111578
1197	rs2730721	12	119090391	4.15947e-28	119074676	119123916	18	1	1	rs2730721	1	rs2730721
1198	rs28360463	12	121647324	3.16637e-39	121386122	121692868	31	2	2	rs1169284;rs28360463	2	rs1169284;rs28360463
1199	rs28546504	12	122031510	5.06959e-11	122025657	122112586	16	1	1	rs28546504	1	rs28546504
1200	rs837470	12	125061389	3.93824e-51	125057245	125068759	7	1	1	rs837470	1	rs837470
1201	rs10846824	12	125573371	5.63205e-21	125571879	125588991	10	1	1	rs10846824	1	rs10846824
1202	rs12426190	12	126240559	1.64494e-26	126199960	126279723	22	1	1	rs12426190	1	rs12426190
1203	rs10847135	12	126870208	1.22419e-12	126868929	126872635	4	2	1	rs10847135	1	rs10847135
1204	rs1949022	12	127733148	1.29141e-64	127608066	127735045	25	2	2	rs2662791;rs1949022	2	rs2662791;rs1949022
1205	rs7487598	12	128536551	4.50795e-10	128536551	128543593	4	1	1	rs7487598	1	rs7487598
1206	rs56176022	12	128884125	1.0006e-09	128878243	128884125	2	1	1	rs56176022	1	rs56176022
1207	rs668600	12	129431049	2.85841e-37	129431049	129431158	3	1	1	rs668600	1	rs668600
1208	rs10744415	12	129897259	1.36927e-41	129890898	129919204	8	1	1	rs10744415	1	rs10744415
1209	rs35719073	12	130583535	6.18442e-21	130583535	130583535	1	1	1	rs35719073	1	rs35719073
1210	rs73453030	12	131241784	1.55019e-59	131230577	131361609	101	3	2	rs73453030;rs7296928	1	rs73453030
1211	rs11061419	12	131749831	1.33129e-39	131720201	131767771	17	1	1	rs11061419	1	rs11061419
1212	rs11147288	12	133767153	9.50446e-48	133361345	133839505	72	5	2	rs2306536;rs11147288	2	rs2306536;rs11147288
1213	rs9550585	13	20299564	1.06364e-13	20035166	20484192	59	1	1	rs9550585	1	rs9550585
1214	rs2094667	13	20909520	1.43374e-34	20889630	20913098	6	1	1	rs2094667	1	rs2094667
1215	rs117511544	13	21673813	1.30413e-19	21662011	21675900	10	2	2	rs117511544;rs8000408	1	rs117511544
1216	rs9506741	13	22415612	1.7896e-16	22415612	22418039	5	1	1	rs9506741	1	rs9506741
1217	rs73167634	13	28343233	7.11621e-21	28337187	28350779	8	1	1	rs73167634	1	rs73167634
1218	rs4768983	13	29159684	9.0357e-46	29159684	29159684	1	1	1	rs4768983	1	rs4768983
1219	rs9506114	13	29723864	6.71428e-31	29708535	29739642	4	1	1	rs9506114	1	rs9506114
1220	rs17599975	13	31472977	2.61048e-17	31289954	31480423	8	2	2	rs4076128;rs17599975	2	rs4076128;rs17599975
1221	rs9536936	13	33842309	3.41075e-13	33821111	33842309	5	1	1	rs9536936	1	rs9536936
1222	rs2322117	13	35162269	5.47326e-13	35139400	35162269	5	1	1	rs2322117	1	rs2322117
1223	rs12583797	13	35511359	2.03466e-48	35511359	35999841	14	1	1	rs12583797	1	rs12583797
1224	rs4943408	13	37290653	3.99402e-08	37279327	37303176	7	2	1	rs4943408	1	rs4943408
1225	rs73181034	13	37939288	9.15037e-101	37905423	38260055	27	2	2	rs73181034;rs75914523	2	rs73181034;rs75914523
1226	rs7992584	13	40189552	8.17528e-11	40187880	40189552	2	1	1	rs7992584	1	rs7992584
1227	rs9567015	13	43243088	9.72679e-16	43243088	43275043	10	1	1	rs9567015	1	rs9567015
1228	rs9595236	13	45639546	2.32544e-21	45639546	45639546	1	1	1	rs9595236	1	rs9595236
1229	rs1571052	13	46554849	2.17736e-37	46523347	46651831	42	2	1	rs1571052	1	rs1571052
1230	rs10507546	13	47483074	2.5729e-14	47483074	47542696	13	1	1	rs10507546	1	rs10507546
1231	rs4942758	13	48787990	3.61611e-120	48504903	48794395	54	3	2	rs9526424;rs4942758	2	rs9526424;rs4942758
1232	rs688871	13	51328057	6.3798e-39	51321090	51335561	28	1	1	rs688871	1	rs688871
1233	rs1555551	13	53757540	4.28223e-27	53681276	53857042	18	2	1	rs1555551	1	rs1555551
1234	rs7988358	13	56485005	1e-200	55685002	56531743	190	3	2	rs3098265;rs7988358	2	rs3098265;rs7988358
1235	rs339533	13	60538310	8.55154e-75	60484310	61195706	74	5	2	rs339533;rs7986845	2	rs339533;rs7986845
1236	rs983220	13	61647320	2.43557e-39	61643176	61659194	4	1	1	rs983220	1	rs983220
1237	rs12873881	13	63187305	5.25872e-195	62159816	63187305	107	6	5	rs9528437;rs67186598;rs73207795;rs12873881;rs12865705	3	rs9528437;rs73207795;rs12873881
1238	rs9539969	13	64749441	5.40073e-09	64636376	64845393	126	1	1	rs9539969	1	rs9539969
1239	rs9317478	13	65583733	2.06618e-09	65484222	65638210	13	1	1	rs9317478	1	rs9317478
1240	rs61956718	13	66623714	7.85626e-51	66512023	66723806	69	1	1	rs61956718	1	rs61956718
1241	rs9541177	13	68183928	2.0648e-59	68144296	68183928	2	1	1	rs9541177	1	rs9541177
1242	rs57713566	13	70367853	1.23559e-95	70289647	70644467	67	2	2	rs57713566;rs9572349	2	rs57713566;rs9572349
1243	rs55740369	13	75032764	1e-200	74977064	75087662	13	2	2	rs55740369;rs1409584	2	rs55740369;rs1409584
1244	rs9544056	13	76443847	3.41637e-64	76208577	76443847	19	2	2	rs2224797;rs9544056	2	rs2224797;rs9544056
1245	rs12864396	13	77021434	4.26426e-199	76977029	77079079	40	2	1	rs12864396	1	rs12864396
1246	rs9318525	13	78768941	1.1891e-27	78768941	78768941	1	1	1	rs9318525	1	rs9318525
1247	rs1002887	13	79782087	3.57621e-32	79757405	79793180	6	1	1	rs1002887	1	rs1002887
1248	rs9546426	13	84090575	3.84846e-51	84086794	84128770	9	1	1	rs9546426	1	rs9546426
1249	rs1846801	13	85624464	1.39403e-65	85568330	85695595	27	3	3	rs1604180;rs12584018;rs1846801	3	rs1604180;rs12584018;rs1846801
1250	rs56964932	13	88081517	1.77347e-11	88038982	88087377	45	1	1	rs56964932	1	rs56964932
1251	rs12585633	13	90265129	4.67143e-08	90243711	90371114	19	1	1	rs12585633	1	rs12585633
1252	rs612195	13	91794069	8.73486e-35	91765720	91826169	18	1	1	rs612195	1	rs612195
1253	rs77006743	13	98454717	7.7892e-15	98438454	98486904	17	1	1	rs77006743	1	rs77006743
1254	rs3783015	13	99051172	1.34437e-11	99051172	99055068	3	1	1	rs3783015	1	rs3783015
1255	rs59414041	13	100580713	2.09575e-38	100580697	100586432	3	1	1	rs59414041	1	rs59414041
1256	rs2783230	13	101083143	5.35354e-22	101055584	101142024	9	1	1	rs2783230	1	rs2783230
1257	rs9514003	13	102905886	2.29693e-22	102905886	102951924	7	1	1	rs9514003	1	rs9514003
1258	rs9555009	13	104537702	3.91248e-17	104527389	104559693	10	4	1	rs9555009	1	rs9555009
1259	rs72649298	13	106683877	1.52018e-114	106666775	106683877	7	1	1	rs72649298	1	rs72649298
1260	rs9520225	13	107516667	9.72246e-30	107511597	107519489	11	1	1	rs9520225	1	rs9520225
1261	rs9520725	13	108676500	1e-200	108675421	108677829	8	1	1	rs9520725	1	rs9520725
1262	rs55902642	13	108981411	4.92528e-63	108970220	108981411	2	1	1	rs55902642	1	rs55902642
1263	rs1926526	13	109358612	7.31025e-95	109352667	109359162	11	1	1	rs1926526	1	rs1926526
1264	rs9521371	13	110084960	7.14775e-24	110078399	110095088	4	1	1	rs9521371	1	rs9521371
1265	rs55698841	13	110893414	6.07254e-48	110716808	110898309	16	2	2	rs7336335;rs55698841	2	rs7336335;rs55698841
1266	rs9522106	13	111713028	1.55517e-08	111660412	111713028	14	1	1	rs9522106	1	rs9522106
1267	rs9577916	13	114580382	1.72654e-75	114570364	114580382	2	1	1	rs9577916	1	rs9577916
1268	rs2242531	14	21998108	1.39752e-27	21998108	22001733	8	1	1	rs2242531	1	rs2242531
1269	rs11622938	14	22651353	2.60416e-12	22616834	22694331	52	1	1	rs11622938	1	rs11622938
1270	rs7143486	14	23310152	1e-200	23310152	23311044	3	1	1	rs7143486	1	rs7143486
1271	rs4982768	14	24007810	2.37674e-23	24002459	24064768	13	2	2	rs4982768;rs222687	2	rs4982768;rs222687
1272	rs61986134	14	26531993	1.75223e-20	26497249	26531993	9	1	1	rs61986134	1	rs61986134
1273	rs1191353	14	28577036	1.7687e-70	28534496	28597249	30	1	1	rs1191353	1	rs1191353
1274	rs2180454	14	29690513	3.83963e-20	29675234	29690513	5	1	1	rs2180454	1	rs2180454
1275	rs225884	14	30473054	1.08838e-32	30473054	30513178	12	7	1	rs225884	1	rs225884
1276	rs61976859	14	31583512	6.30643e-33	31583512	31583512	1	1	1	rs61976859	1	rs61976859
1277	rs8013268	14	33668748	1e-200	33664274	33677311	15	1	1	rs8013268	1	rs8013268
1278	rs10498326	14	34469167	5.42158e-15	34461397	34475944	6	1	1	rs10498326	1	rs10498326
1279	rs10146562	14	35622480	1e-200	35507736	35814804	99	12	2	rs10146562;rs74043845	2	rs10146562;rs74043845
1280	rs1755776	14	36693285	1.44839e-28	36685165	36705534	9	1	1	rs1755776	1	rs1755776
1281	rs8009933	14	39600212	4.05962e-23	39535694	39648781	12	1	1	rs8009933	1	rs8009933
1282	rs11622817	14	42684817	9.04842e-44	42479897	42717401	74	2	2	rs11157269;rs11622817	2	rs11157269;rs11622817
1283	rs10146311	14	43862631	4.72743e-84	43724189	44114387	77	2	2	rs10146311;rs60739365	2	rs10146311;rs60739365
1284	rs12891696	14	46431023	3.11149e-14	46334393	46631379	122	8	1	rs12891696	1	rs12891696
1285	rs72678430	14	47491311	1.84957e-97	47491311	47506875	3	2	1	rs72678430	1	rs72678430
1286	rs2096032	14	50829380	6.0734e-59	50734282	50844367	29	23	1	rs2096032	1	rs2096032
1287	rs60411126	14	51864860	3.02341e-39	51864860	51865228	2	1	1	rs60411126	1	rs60411126
1288	rs7159644	14	52649581	7.68094e-27	52649581	52671812	5	1	1	rs7159644	1	rs7159644
1289	rs2295818	14	55215297	1.33747e-50	55204677	55215297	2	1	1	rs2295818	1	rs2295818
1290	rs2170658	14	57297059	1.40371e-25	57287810	57297059	3	1	1	rs2170658	1	rs2170658
1291	rs7147424	14	57634263	5.71313e-15	57631785	57634630	6	1	1	rs7147424	1	rs7147424
1292	rs34605172	14	60308133	5.21494e-23	60260355	60629927	39	3	1	rs34605172	1	rs34605172
1293	rs17808028	14	62556950	2.10003e-27	62556950	62556950	1	1	1	rs17808028	1	rs17808028
1294	rs1007062	14	63498060	5.60248e-59	63454389	63498060	14	1	1	rs1007062	1	rs1007062
1295	rs1444169	14	66484119	2.14197e-08	66482451	66538532	5	1	1	rs1444169	1	rs1444169
1296	rs2525511	14	68968551	1.76564e-08	68968551	68968551	1	1	1	rs2525511	1	rs2525511
1297	rs12588623	14	70817914	8.2013e-17	70763997	70974158	46	1	1	rs12588623	1	rs12588623
1298	rs2806034	14	73422350	1.04247e-49	73343577	73633855	25	1	1	rs2806034	1	rs2806034
1299	rs2011535	14	75833195	2.31235e-13	75833195	75833195	1	1	1	rs2011535	1	rs2011535
1300	rs4268687	14	78466304	3.40352e-54	78039971	78501200	94	55	3	rs149524083;rs4268687;rs12885211	2	rs149524083;rs4268687
1301	rs7145730	14	79245355	4.37142e-18	79222451	79245355	5	1	1	rs7145730	1	rs7145730
1302	rs17110313	14	80579871	5.88777e-24	80566990	80764455	37	1	1	rs17110313	1	rs17110313
1303	rs28622938	14	81772635	2.8281e-50	81768183	81784356	23	1	1	rs28622938	1	rs28622938
1304	rs8020911	14	82250573	3.04196e-48	82136840	82284362	25	2	2	rs12436817;rs8020911	2	rs12436817;rs8020911
1305	rs1609912	14	83932280	2.6039e-22	83932280	83932280	1	1	1	rs1609912	1	rs1609912
1306	rs1383795	14	85141162	3.8622e-55	85112638	85141162	2	1	1	rs1383795	1	rs1383795
1307	rs1957792	14	86319868	1.52516e-91	86014109	86326687	18	2	2	rs8021645;rs1957792	2	rs8021645;rs1957792
1308	rs2628658	14	87706364	1.28432e-12	87661581	87716532	8	1	1	rs2628658	1	rs2628658
1309	rs78597388	14	88129695	8.3125e-46	88046145	88166682	17	1	1	rs78597388	1	rs78597388
1310	rs1940542	14	88693311	3.50736e-19	88657620	88762835	20	3	2	rs1940542;rs34827096	2	rs1940542;rs34827096
1311	rs17126053	14	90033633	4.25009e-51	89839479	90225971	10	3	3	rs6575060;rs17126053;rs7143435	3	rs6575060;rs17126053;rs7143435
1312	rs75055810	14	91329386	2.72764e-14	91327865	91385324	8	1	1	rs75055810	1	rs75055810
1313	rs4904831	14	92517355	3.30738e-11	92424352	92561837	86	1	1	rs4904831	1	rs4904831
1314	rs12590180	14	93096616	1.13239e-69	93084380	93104959	11	1	1	rs12590180	1	rs12590180
1315	rs1740694	14	93510531	4.57175e-61	93487943	93653649	13	3	2	rs1740694;rs10133344	2	rs1740694;rs10133344
1316	rs80022176	14	95142545	3.91614e-38	94998068	95142545	12	2	2	rs73342680;rs80022176	2	rs73342680;rs80022176
1317	rs12888924	14	96287146	3.27684e-51	96275905	96300926	10	3	1	rs12888924	1	rs12888924
1318	rs28458357	14	98194527	2.92162e-33	98138102	98210883	13	2	2	rs234173;rs28458357	2	rs234173;rs28458357
1319	rs1078608	14	99813213	1.34298e-08	99813213	99820051	3	1	1	rs1078608	1	rs1078608
1320	rs1373	14	100808510	6.30655e-13	100792482	100843804	28	1	1	rs1373	1	rs1373
1321	rs10131067	14	104142792	1.01534e-18	104025337	104161495	36	1	1	rs10131067	1	rs10131067
1322	rs72715966	14	105186163	1.43081e-25	105175238	105190331	12	1	1	rs72715966	1	rs72715966
1323	rs2819458	14	105448337	7.11405e-17	105448337	105454126	6	1	1	rs2819458	1	rs2819458
1324	rs61995388	15	24666056	5.76806e-167	24204134	24848014	474	4	3	rs55737633;rs5015958;rs61995388	3	rs55737633;rs5015958;rs61995388
1325	rs28403264	15	26628964	4.44854e-09	26628964	26630941	2	1	1	rs28403264	1	rs28403264
1326	rs57724926	15	28150107	1.15879e-24	28090808	28176370	13	1	1	rs57724926	1	rs57724926
1327	rs60420783	15	30257847	2.07199e-09	30242386	30271835	21	8	1	rs60420783	1	rs60420783
1328	rs28366602	15	31755805	2.87855e-93	31748933	31773749	38	1	1	rs28366602	1	rs28366602
1329	rs583413	15	33885521	4.1184e-29	33693206	33885521	11	2	2	rs12910838;rs583413	2	rs12910838;rs583413
1330	rs75915717	15	34498314	2.93151e-13	34439759	34538636	15	1	1	rs75915717	1	rs75915717
1331	rs16960916	15	35719880	2.52629e-08	35567914	35723967	60	1	1	rs16960916	1	rs16960916
1332	rs12594565	15	39176900	9.64755e-43	39163589	39176900	4	1	1	rs12594565	1	rs12594565
1333	rs62002378	15	39805096	1.05797e-28	39767744	39816290	18	1	1	rs62002378	1	rs62002378
1334	rs78092957	15	40143645	1e-200	40139187	40143645	2	1	1	rs78092957	1	rs78092957
1335	rs79408247	15	40637472	3.07787e-17	40625758	40650435	6	1	1	rs79408247	1	rs79408247
1336	rs7182700	15	41677752	1.15144e-22	41567369	41793494	56	1	1	rs7182700	1	rs7182700
1337	rs1719247	15	45620985	8.83671e-155	45553543	45740392	37	3	1	rs1719247	1	rs1719247
1338	rs12915190	15	46770048	4.57503e-11	46745723	46829515	17	1	1	rs12915190	1	rs12915190
1339	rs12438094	15	47096646	6.06476e-31	47096646	47141828	12	1	1	rs12438094	1	rs12438094
1340	rs55904469	15	49789971	1.48107e-42	49688402	50004817	29	1	1	rs55904469	1	rs55904469
1341	rs4465562	15	53009377	1.61141e-95	53009377	53239874	49	2	2	rs4465562;rs8025290	2	rs4465562;rs8025290
1342	rs690107	15	54108161	1.26785e-47	53857964	54135097	23	4	2	rs1906432;rs690107	2	rs1906432;rs690107
1343	rs7161981	15	55726437	1e-200	55644149	55789793	107	2	1	rs7161981	1	rs7161981
1344	rs17819384	15	56437774	4.16653e-13	56406620	56766940	4	1	1	rs17819384	1	rs17819384
1345	rs7179352	15	59522622	1.62756e-97	59517629	59557989	5	1	1	rs7179352	1	rs7179352
1346	rs7165592	15	60619296	6.55931e-162	60608397	60657242	15	1	1	rs7165592	1	rs7165592
1347	rs2471027	15	62800731	3.94635e-08	62778214	62813670	9	1	1	rs2471027	1	rs2471027
1348	rs12148828	15	63355339	2.60018e-40	63344729	63355339	5	1	1	rs12148828	1	rs12148828
1349	rs11633915	15	66464105	1.04802e-13	66430645	66575972	20	3	3	rs16949548;rs11633915;rs12908529	3	rs16949548;rs11633915;rs12908529
1350	rs11856272	15	68711518	2.79179e-10	68711518	68711518	1	1	1	rs11856272	1	rs11856272
1351	rs34433849	15	69560081	2.8677e-106	69454261	69617924	31	1	1	rs34433849	1	rs34433849
1352	rs2679616	15	70205637	1e-200	70144210	70208075	53	45	1	rs2679616	1	rs2679616
1353	rs12903187	15	71702266	1e-200	71591912	71704864	23	6	1	rs12903187	1	rs12903187
1354	rs78810435	15	73116649	4.17944e-35	73110699	73165347	17	14	1	rs78810435	1	rs78810435
1355	rs12592318	15	84219700	4.99733e-75	84219700	84232366	2	2	1	rs12592318	1	rs12592318
1356	rs7167787	15	87079441	3.26896e-73	87038600	87079441	5	1	1	rs7167787	1	rs7167787
1357	rs62020814	15	90008412	1.01532e-47	90004659	90040806	10	1	1	rs62020814	1	rs62020814
1358	rs6496658	15	90884105	2.56273e-13	90868741	90894621	4	1	1	rs6496658	1	rs6496658
1359	rs868547	15	91498760	2.89248e-33	91412850	91498760	11	2	2	rs11539637;rs868547	2	rs11539637;rs868547
1360	rs16975755	15	96419855	7.72296e-33	96419855	96419855	1	1	1	rs16975755	1	rs16975755
1361	rs13380379	15	97162132	1.73203e-28	97151855	97164517	8	1	1	rs13380379	1	rs13380379
1362	rs8028162	15	97503301	1.67926e-21	97502107	97515684	18	10	1	rs8028162	1	rs8028162
1363	rs4281685	15	97933579	1.91006e-09	97928019	97938535	4	1	1	rs4281685	1	rs4281685
1364	rs2418487	15	100585610	4.85628e-151	100558391	100594299	22	1	1	rs2418487	1	rs2418487
1365	rs1107212	15	101566456	2.19699e-34	101566456	101923697	12	3	3	rs1107212;rs11630126;rs2277590	3	rs1107212;rs11630126;rs2277590
1366	rs2738893	16	1269029	7.31503e-10	1269029	1283325	6	1	1	rs2738893	1	rs2738893
1367	rs4567716	16	1849410	2.85997e-114	1818152	1966603	16	1	1	rs4567716	1	rs4567716
1368	rs3760079	16	3096077	8.89178e-09	2979412	3101639	12	3	2	rs9935735;rs3760079	2	rs9935735;rs3760079
1369	rs17198722	16	3569130	1.00257e-92	3569130	3569130	1	1	1	rs17198722	1	rs17198722
1370	rs9923395	16	4427783	2.54507e-19	4420817	4447552	7	2	1	rs9923395	1	rs9923395
1371	rs62036066	16	4809334	5.42034e-50	4809334	4809334	1	1	1	rs62036066	1	rs62036066
1372	rs2076936	16	5577161	1.60775e-11	5572539	5598078	9	3	1	rs2076936	1	rs2076936
1373	rs72770952	16	6004802	2.05026e-24	6004802	6012106	3	1	1	rs72770952	1	rs72770952
1374	rs4787052	16	7691091	1.14089e-30	7690419	7691091	2	2	1	rs4787052	1	rs4787052
1375	rs111595973	16	9617180	3.73695e-81	9576148	9617180	5	1	1	rs111595973	1	rs111595973
1376	rs12926983	16	10365617	4.12566e-21	10361766	10630988	27	14	2	rs12926983;rs6498070	2	rs12926983;rs6498070
1377	rs12919717	16	10973185	9.20857e-88	10973185	10993267	3	1	1	rs12919717	1	rs12919717
1378	rs13335015	16	19905164	8.96977e-98	19840374	19942385	23	1	1	rs13335015	1	rs13335015
1379	rs10775267	16	20237977	2.51772e-19	20237977	20237977	1	1	1	rs10775267	1	rs10775267
1380	rs7203113	16	21680493	4.61692e-18	21610804	21770405	17	1	1	rs7203113	1	rs7203113
1381	rs56262755	16	22734236	2.69684e-39	22734236	22734236	1	1	1	rs56262755	1	rs56262755
1382	rs1976196	16	24065997	1.08728e-08	24063473	24069980	5	1	1	rs1976196	1	rs1976196
1383	rs7192743	16	25296378	2.02096e-21	25250064	25348961	48	2	1	rs7192743	1	rs7192743
1384	rs4559914	16	25755591	3.34379e-165	25748694	25771744	5	1	1	rs4559914	1	rs4559914
1385	rs1515887	16	27062009	9.14604e-13	27055276	27062528	4	1	1	rs1515887	1	rs1515887
1386	rs12445744	16	28588395	2.0916e-14	28338039	28895130	357	214	1	rs12445744	1	rs12445744
1387	rs9936496	16	29758793	1e-200	29701208	29764958	20	1	1	rs9936496	1	rs9936496
1388	rs4785482	16	50974725	1.08611e-96	50972484	50979745	3	1	1	rs4785482	1	rs4785482
1389	rs12597686	16	52682324	1e-200	52420574	52682324	4	2	2	rs1362553;rs12597686	2	rs1362553;rs12597686
1390	rs11867005	16	53547808	5.32779e-19	53544174	53547808	2	1	1	rs11867005	1	rs11867005
1391	rs9940128	16	53800754	2.05754e-10	53797908	53845487	116	22	1	rs9940128	1	rs9940128
1392	rs62032858	16	54316914	7.21999e-46	54311957	54316914	3	1	1	rs62032858	1	rs62032858
1393	rs72810563	16	56005605	7.39065e-21	55999700	56005605	8	1	1	rs72810563	1	rs72810563
1394	rs4368156	16	56874272	3.24979e-20	56741117	56899903	17	1	1	rs4368156	1	rs4368156
1395	rs1423971	16	59377850	7.7203e-10	59260188	59497419	50	1	1	rs1423971	1	rs1423971
1396	rs4785112	16	60459666	1e-200	60225631	60537683	41	3	3	rs8053038;rs4785112;rs11642864	2	rs8053038;rs4785112
1397	rs11643263	16	61856300	1.37252e-48	61579965	61945557	21	2	2	rs7195559;rs11643263	2	rs7195559;rs11643263
1398	rs380124	16	62663719	4.55502e-87	62663719	62674388	2	1	1	rs380124	1	rs380124
1399	rs9924669	16	63470727	7.29447e-39	63448476	63523799	17	1	1	rs9924669	1	rs9924669
1400	rs16966654	16	63894280	3.01027e-24	63886127	63990007	17	1	1	rs16966654	1	rs16966654
1401	rs149194	16	65897016	4.28052e-32	65897016	65908562	2	2	2	rs149194;rs8062968	2	rs149194;rs8062968
1402	rs36114735	16	72017683	4.16602e-11	71930105	72017683	5	1	1	rs36114735	1	rs36114735
1403	rs9921177	16	72336481	1.19103e-12	72336481	72656837	22	1	1	rs9921177	1	rs9921177
1404	rs112685216	16	74609517	3.08882e-13	74479567	74628646	9	1	1	rs112685216	1	rs112685216
1405	rs28420209	16	77826422	2.96564e-104	77006440	77833166	30	6	6	rs284006;rs66471623;rs12443792;rs282941;rs7203274;rs28420209	6	rs284006;rs66471623;rs12443792;rs282941;rs7203274;rs28420209
1406	rs4888772	16	78304972	2.63252e-23	78291838	78304972	5	1	1	rs4888772	1	rs4888772
1407	rs4888913	16	79031985	1.08999e-26	79031985	79031985	1	1	1	rs4888913	1	rs4888913
1408	rs8055798	16	80347251	1.64544e-22	80347251	80347251	1	1	1	rs8055798	1	rs8055798
1409	rs28555103	16	82725902	1.55177e-20	82725902	82725902	1	1	1	rs28555103	1	rs28555103
1410	rs34918046	16	83224540	2.03337e-26	83212398	83649981	16	4	4	rs34918046;rs76469326;rs2306904;rs9936055	3	rs34918046;rs76469326;rs9936055
1411	rs34284536	16	84467915	1.00769e-09	84467915	84469443	2	1	1	rs34284536	1	rs34284536
1412	rs1693951	16	86266440	6.61994e-32	86098452	86272696	24	2	2	rs66526436;rs1693951	2	rs66526436;rs1693951
1413	rs9796837	16	86991924	5.08807e-122	86983113	86991924	3	1	1	rs9796837	1	rs9796837
1414	rs4608344	16	87463483	1.0776e-14	87425683	87522129	6	1	1	rs4608344	1	rs4608344
1415	rs8047611	16	87816592	4.48584e-95	87816385	87826725	3	1	1	rs8047611	1	rs8047611
1416	rs11641738	16	88955458	1.83835e-21	88955458	88961942	5	1	1	rs11641738	1	rs11641738
1417	rs12051571	17	506808	2.1875e-13	470314	636920	8	1	1	rs12051571	1	rs12051571
1418	rs56892207	17	2675474	2.32256e-74	2675474	2681795	3	1	1	rs56892207	1	rs56892207
1419	rs11871243	17	6166666	1.16698e-20	6166474	6192171	9	1	1	rs11871243	1	rs11871243
1420	rs11654150	17	8257499	1.07321e-88	8096544	8257523	40	3	2	rs11654150;rs2313286	1	rs11654150
1421	rs9907246	17	17770965	3.27511e-08	17708846	18028852	77	11	1	rs9907246	1	rs9907246
1422	rs7211948	17	20081257	3.63075e-12	19974134	20360744	89	1	1	rs7211948	1	rs7211948
1423	rs9906829	17	21432548	1.15586e-09	21432548	21432548	1	1	1	rs9906829	1	rs9906829
1424	rs11655873	17	26335481	1e-200	26327030	26478156	37	33	1	rs11655873	1	rs11655873
1425	rs62062228	17	30016260	6.73487e-42	29995458	30192244	11	2	2	rs62062228;rs11080171	2	rs62062228;rs11080171
1426	rs4795759	17	31591397	8.87989e-119	31591397	31591397	1	1	1	rs4795759	1	rs4795759
1427	rs4583295	17	31908521	2.01914e-08	31908521	31908521	1	1	1	rs4583295	1	rs4583295
1428	rs3091237	17	32597803	1.35822e-71	32197399	32623561	24	3	3	rs167596;rs17783779;rs3091237	3	rs167596;rs17783779;rs3091237
1429	rs72824004	17	38938222	7.61394e-09	38938222	38943211	2	1	1	rs72824004	1	rs72824004
1430	rs4796734	17	40046569	3.00164e-48	39975164	40209531	46	2	2	rs4796734;rs57825218	1	rs4796734
1431	rs4793938	17	46665229	6.60217e-12	46645999	47140794	99	14	4	rs4793938;rs999475;rs9902512;rs62075818	2	rs4793938;rs999475
1432	rs2537700	17	47687728	1.98409e-08	47687728	47960187	14	1	1	rs2537700	1	rs2537700
1433	rs16950191	17	49710443	2.01545e-44	49703990	49730364	4	1	1	rs16950191	1	rs16950191
1434	rs11653498	17	52927550	1.50089e-16	52918745	52935126	5	1	1	rs11653498	1	rs11653498
1435	rs6505054	17	54468973	2.62876e-36	54440044	54521573	31	1	1	rs6505054	1	rs6505054
1436	rs2111018	17	55661511	1e-200	55624121	55675058	7	2	2	rs2111018;rs62058104	1	rs2111018
1437	rs59783655	17	63637851	3.36891e-10	63634508	63647804	7	1	1	rs59783655	1	rs59783655
1438	rs16959227	17	64411414	2.90176e-106	64411414	64831657	13	4	3	rs16959227;rs73329708;rs758657	3	rs16959227;rs73329708;rs758657
1439	rs2949951	17	65454414	1.33998e-20	65454414	65454414	1	1	1	rs2949951	1	rs2949951
1440	rs11650950	17	71112670	1.49265e-100	71112670	71116441	2	1	1	rs11650950	1	rs11650950
1441	rs4789253	17	74220591	4.57398e-113	74205149	74277662	27	6	1	rs4789253	1	rs4789253
1442	rs4647880	17	74532081	2.42286e-12	74532081	74558478	3	1	1	rs4647880	1	rs4647880
1443	rs78043512	17	75157354	3.50578e-141	75122581	75357839	20	7	2	rs78043512;rs312879	2	rs78043512;rs312879
1444	rs11655421	17	76251518	3.96576e-26	76242632	76286246	12	2	2	rs11655421;rs59150787	2	rs11655421;rs59150787
1445	rs1795959	17	77148939	2.6048e-30	77148939	77148939	1	1	1	rs1795959	1	rs1795959
1446	rs7221291	17	78344343	3.9141e-14	78340931	78395060	14	1	1	rs7221291	1	rs7221291
1447	rs76334049	17	78794255	1.332e-59	78773977	78794255	2	2	2	rs11652074;rs76334049	2	rs11652074;rs76334049
1448	rs72855621	17	79529554	6.14773e-16	79529554	79595250	34	1	1	rs72855621	1	rs72855621
1449	rs2847028	18	85021	8.65678e-32	69805	348265	32	2	2	rs2847028;rs8085115	2	rs2847028;rs8085115
1450	rs59291671	18	2277344	6.03639e-11	2275019	2277372	8	1	1	rs59291671	1	rs59291671
1451	rs10460015	18	4240553	8.39928e-39	4015890	4332485	16	3	3	rs9945305;rs10460015;rs656832	3	rs9945305;rs10460015;rs656832
1452	rs4327145	18	5124045	1.13271e-61	5114989	5124308	4	1	1	rs4327145	1	rs4327145
1453	rs11872788	18	7410668	3.38197e-16	7398495	7463363	21	2	2	rs11872788;rs11874505	2	rs11872788;rs11874505
1454	rs6506540	18	7936938	2.70554e-98	7936938	8207244	7	2	2	rs6506540;rs11874230	2	rs6506540;rs11874230
1455	rs7231518	18	9456965	2.78814e-37	9441724	9657501	10	2	2	rs7231518;rs12961532	2	rs7231518;rs12961532
1456	rs11874303	18	10414037	4.11479e-165	10414037	10418174	2	1	1	rs11874303	1	rs11874303
1457	rs2865135	18	10811275	2.34703e-17	10781470	10812530	7	1	1	rs2865135	1	rs2865135
1458	rs1265931	18	11900863	1e-200	11670036	12004046	10	3	3	rs17586824;rs1265931;rs7226475	3	rs17586824;rs1265931;rs7226475
1459	rs7504974	18	12327752	3.87039e-27	12303307	12734568	68	2	2	rs7504974;rs7233175	2	rs7504974;rs7233175
1460	rs3930962	18	13999049	3.18556e-31	13999049	14139616	50	23	1	rs3930962	1	rs3930962
1461	rs61276079	18	20480061	6.65321e-23	20300582	20610852	29	1	1	rs61276079	1	rs61276079
1462	rs62081815	18	24359641	1.36198e-13	24350125	24368558	4	1	1	rs62081815	1	rs62081815
1463	rs1426870	18	24789581	1.64849e-38	24789581	24838348	19	2	1	rs1426870	1	rs1426870
1464	rs11564339	18	25731500	3.60791e-10	25731500	25731500	1	1	1	rs11564339	1	rs11564339
1465	rs7234819	18	26674692	4.48394e-09	26672952	26674692	2	1	1	rs7234819	1	rs7234819
1466	rs2595372	18	29238357	6.00385e-09	29238357	29238357	1	1	1	rs2595372	1	rs2595372
1467	rs1241347	18	33182828	1.52723e-86	33159976	33307314	11	1	1	rs1241347	1	rs1241347
1468	rs594445	18	33831189	2.29002e-09	33815161	33834464	10	1	1	rs594445	1	rs594445
1469	rs9946713	18	39890543	2.78757e-16	39869103	40176205	16	2	2	rs9946713;rs4243262	2	rs9946713;rs4243262
1470	rs72920629	18	45023442	1.05788e-94	44285649	45024512	129	3	3	rs12607312;rs72915093;rs72920629	3	rs12607312;rs72915093;rs72920629
1471	rs299704	18	46147078	7.52567e-28	46147078	46147078	1	1	1	rs299704	1	rs299704
1472	rs72912892	18	49834378	6.62794e-09	49795940	49916015	9	1	1	rs72912892	1	rs72912892
1473	rs16957367	18	51377268	2.00676e-98	51196218	51443772	37	1	1	rs16957367	1	rs16957367
1474	rs2956141	18	51809122	1.93075e-43	51780782	51834857	33	1	1	rs2956141	1	rs2956141
1475	rs732796	18	55791637	9.45633e-16	55791637	55809565	10	1	1	rs732796	1	rs732796
1476	rs12458380	18	57649538	2.92589e-11	57649538	57653031	11	1	1	rs12458380	1	rs12458380
1477	rs9320007	18	59950871	7.47699e-26	59477259	59987693	12	3	2	rs4941060;rs9320007	2	rs4941060;rs9320007
1478	rs1564483	18	60794654	2.39541e-37	60794654	60794654	1	1	1	rs1564483	1	rs1564483
1479	rs1660281	18	62542694	4.18732e-12	62542694	62548401	6	1	1	rs1660281	1	rs1660281
1480	rs12964385	18	62958173	2.28048e-43	62931252	62985451	12	1	1	rs12964385	1	rs12964385
1481	rs7504651	18	65045137	2.59054e-52	64918161	65060345	19	2	2	rs11663569;rs7504651	2	rs11663569;rs7504651
1482	rs12955773	18	65891442	3.42864e-09	65849566	65893865	7	1	1	rs12955773	1	rs12955773
1483	rs12959114	18	67062811	7.58474e-16	67062811	67130877	6	1	1	rs12959114	1	rs12959114
1484	rs11660736	18	70066194	6.32792e-74	70066194	70084209	4	1	1	rs11660736	1	rs11660736
1485	rs9951604	18	71736079	2.32268e-155	71720844	71829541	32	1	1	rs9951604	1	rs9951604
1486	rs7234939	18	72142145	2.10733e-10	72142145	72184216	5	1	1	rs7234939	1	rs7234939
1487	rs17055785	18	72576774	9.76814e-49	72576774	72639779	8	1	1	rs17055785	1	rs17055785
1488	rs9962473	18	76375492	3.48057e-20	76249104	76381576	8	2	2	rs934849;rs9962473	2	rs934849;rs9962473
1489	rs2169247	18	77451403	1e-200	77293898	77481828	8	2	2	rs9961524;rs2169247	2	rs9961524;rs2169247
1490	rs4062107	19	3166907	6.86424e-32	3156462	3166907	2	1	1	rs4062107	1	rs4062107
1491	rs8112768	19	3582603	8.02248e-16	3497241	3589074	9	2	2	rs62130574;rs8112768	2	rs62130574;rs8112768
1492	rs72993048	19	6553629	4.09599e-85	6553629	6553629	1	1	1	rs72993048	1	rs72993048
1493	rs55789806	19	7924950	4.00894e-08	7888874	7977870	15	1	1	rs55789806	1	rs55789806
1494	rs12461664	19	9104771	2.97626e-15	9036674	9104771	7	1	1	rs12461664	1	rs12461664
1495	rs10407637	19	9816851	5.78588e-44	9718731	9893601	71	1	1	rs10407637	1	rs10407637
1496	rs55997232	19	11188117	2.98362e-15	11163824	11345183	35	9	3	rs55997232;rs112369586;rs10421795	2	rs55997232;rs10421795
1497	rs394416	19	11942615	5.70525e-29	11871362	11956966	56	2	1	rs394416	1	rs394416
1498	rs35759402	19	12452156	9.29565e-12	12452156	12452156	1	1	1	rs35759402	1	rs35759402
1499	rs1821301	19	15879895	1e-200	15798101	15969192	47	1	1	rs1821301	1	rs1821301
1500	rs388955	19	16356606	1.66449e-16	16263202	16361802	41	1	1	rs388955	1	rs388955
1501	rs2271882	19	18309365	3.87564e-32	18293841	18359678	13	3	2	rs2271882;rs4570996	2	rs2271882;rs4570996
1502	rs2060274	19	19543271	7.59366e-13	19361735	19704915	62	2	1	rs2060274	1	rs2060274
1503	rs10404200	19	20402947	1.48175e-29	20296738	20735196	127	3	2	rs10404200;rs33926	2	rs10404200;rs33926
1504	rs2914647	19	21614773	6.21512e-10	21457140	21740123	115	3	1	rs2914647	1	rs2914647
1505	rs62113746	19	24228768	2.31183e-10	24187343	24362410	81	1	1	rs62113746	1	rs62113746
1506	rs10414194	19	28293894	1.33844e-184	27735764	28440990	216	1	1	rs10414194	1	rs10414194
1507	rs73027594	19	32632913	1.48244e-09	32632913	32632913	1	1	1	rs73027594	1	rs73027594
1508	rs77177483	19	33611605	2.91837e-186	33260125	33629259	52	2	2	rs4805834;rs77177483	2	rs4805834;rs77177483
1509	rs17569	19	33882222	3.65635e-09	33882222	33986379	4	1	1	rs17569	1	rs17569
1510	rs3746257	19	35500470	2.56711e-12	35499271	35532254	5	2	1	rs3746257	1	rs3746257
1511	rs2385796	19	36959310	9.59621e-50	36931374	36999144	33	1	1	rs2385796	1	rs2385796
1512	rs1978715	19	39379031	8.21196e-13	39379031	39379031	1	1	1	rs1978715	1	rs1978715
1513	rs3810392	19	40257034	2.88853e-11	40162593	40258071	13	2	2	rs4803284;rs3810392	2	rs4803284;rs3810392
1514	rs12974061	19	44296006	2.32292e-21	44284531	44306389	14	1	1	rs12974061	1	rs12974061
1515	rs1836279	19	44883814	3.70722e-10	44864252	44883814	14	1	1	rs1836279	1	rs1836279
1516	rs75660000	19	47119227	1.41005e-109	46633336	47122776	31	3	3	rs11083800;rs17288338;rs75660000	3	rs11083800;rs17288338;rs75660000
1517	rs3786709	19	47770507	1.49403e-17	47770507	47770507	1	1	1	rs3786709	1	rs3786709
1518	rs4801776	19	49304215	1.68332e-22	49301882	49326464	7	1	1	rs4801776	1	rs4801776
1519	rs3786674	19	50505402	6.30745e-09	50467872	50648852	29	1	1	rs3786674	1	rs3786674
1520	rs1865069	19	51431159	5.16452e-15	51424126	51432746	19	14	1	rs1865069	1	rs1865069
1521	rs7254774	19	52716840	2.26355e-65	52298512	52741910	75	38	3	rs11084121;rs7248671;rs7254774	3	rs11084121;rs7248671;rs7254774
1522	rs179320	19	53088433	1.52813e-08	53077411	53088433	5	1	1	rs179320	1	rs179320
1523	rs73055055	19	53446824	3.22065e-45	53445163	53451626	8	1	1	rs73055055	1	rs73055055
1524	rs12460778	19	55866929	1.02967e-11	55866468	55872531	3	1	1	rs12460778	1	rs12460778
1525	rs4427915	19	57651808	9.52339e-20	57651808	57660423	5	1	1	rs4427915	1	rs4427915
1526	rs260491	19	58664447	6.39597e-171	58605608	58676325	23	1	1	rs260491	1	rs260491
1527	rs6140144	20	752132	4.1607e-12	752132	752132	1	1	1	rs6140144	1	rs6140144
1528	rs1555324	20	5303028	7.87587e-40	5250158	5372488	9	1	1	rs1555324	1	rs1555324
1529	rs2206461	20	7837676	1.00148e-17	7573831	7879592	35	3	2	rs8122090;rs2206461	2	rs8122090;rs2206461
1530	rs6056626	20	9421037	2.48853e-46	9410708	9475161	26	18	1	rs6056626	1	rs6056626
1531	rs1983612	20	10364140	1.30291e-08	10346442	10398319	9	1	1	rs1983612	1	rs1983612
1532	rs67897813	20	10840823	4.29728e-09	10829290	10882979	5	1	1	rs67897813	1	rs67897813
1533	rs6041631	20	12791181	3.2221e-16	12791181	12791181	1	1	1	rs6041631	1	rs6041631
1534	rs3789343	20	13498547	1.78027e-35	13418535	13543614	26	1	1	rs3789343	1	rs3789343
1535	rs17297763	20	15237211	1.23961e-18	15237211	15237211	1	1	1	rs17297763	1	rs17297763
1536	rs1569813	20	15617180	3.58092e-09	15616734	15617865	3	1	1	rs1569813	1	rs1569813
1537	rs7274520	20	17751840	5.96647e-156	17745016	17973799	9	3	3	rs7274520;rs6045079;rs8121099	3	rs7274520;rs6045079;rs8121099
1538	rs6136532	20	18812003	9.57544e-27	18801962	18896394	20	1	1	rs6136532	1	rs6136532
1539	rs6112285	20	19259163	1.54314e-33	19202004	19307478	43	37	1	rs6112285	1	rs6112285
1540	rs1983920	20	22699484	5.66779e-70	22686104	22739944	28	1	1	rs1983920	1	rs1983920
1541	rs67567111	20	23619075	1.45375e-13	23570158	23630306	41	1	1	rs67567111	1	rs67567111
1542	rs73113144	20	25585215	4.62767e-12	25216115	25948166	32	1	1	rs73113144	1	rs73113144
1543	rs6120810	20	33626249	8.51846e-124	33434423	33792559	114	2	2	rs35552264;rs6120810	2	rs35552264;rs6120810
1544	rs7268250	20	35503182	1.20819e-18	35484450	35503182	2	2	1	rs7268250	1	rs7268250
1545	rs11086753	20	38079606	1.01244e-12	37899298	38154046	38	1	1	rs11086753	1	rs11086753
1546	rs765356	20	42529720	9.74178e-23	42529037	42548816	22	1	1	rs765356	1	rs765356
1547	rs6065781	20	43712809	2.00927e-09	43610944	43712809	14	1	1	rs6065781	1	rs6065781
1548	rs719996	20	44200768	5.93998e-09	44114633	44320918	59	1	1	rs719996	1	rs719996
1549	rs7353304	20	46075606	4.97213e-38	46043814	46077740	10	3	1	rs7353304	1	rs7353304
1550	rs73615305	20	49225953	6.35382e-15	49225953	49225953	1	1	1	rs73615305	1	rs73615305
1551	rs73137551	20	49787149	4.59676e-08	49783085	49797915	6	1	1	rs73137551	1	rs73137551
1552	rs2092954	20	51016925	9.41663e-13	50914231	51178530	188	111	1	rs2092954	1	rs2092954
1553	rs6022347	20	51847746	3.20504e-54	51840317	51859187	3	1	1	rs6022347	1	rs6022347
1554	rs7261265	20	54125615	2.30503e-127	53911745	54466916	54	3	3	rs212581;rs7261265;rs11905645	3	rs212581;rs7261265;rs11905645
1555	rs1276375	20	55596264	3.61157e-39	55585549	55596264	11	1	1	rs1276375	1	rs1276375
1556	rs6100139	20	57195469	3.40782e-20	57187771	57198434	5	1	1	rs6100139	1	rs6100139
1557	rs6065093	20	59918671	1.07139e-14	59917971	59926965	6	2	2	rs6065093;rs4511775	2	rs6065093;rs4511775
1558	rs13045292	20	61004142	1.82897e-25	60759228	61190367	20	3	3	rs1739598;rs13045292;rs28637324	3	rs1739598;rs13045292;rs28637324
1559	rs7275296	21	15700552	1.9319e-10	15699148	15713999	9	1	1	rs7275296	1	rs7275296
1560	rs2823807	21	17817462	1.06704e-12	17815776	17820994	3	1	1	rs2823807	1	rs2823807
1561	rs2824250	21	18542872	7.34106e-28	18517054	18571995	25	1	1	rs2824250	1	rs2824250
1562	rs8132709	21	19061093	7.00009e-76	18903756	19067125	19	3	2	rs2824350;rs8132709	2	rs2824350;rs8132709
1563	rs73204805	21	19587387	6.21892e-10	19587387	19587387	1	1	1	rs73204805	1	rs73204805
1564	rs9974701	21	20034232	6.24301e-25	19930823	20055068	43	4	2	rs7276596;rs9974701	2	rs7276596;rs9974701
1565	rs112590425	21	20545735	8.34953e-25	20512512	20656535	40	2	2	rs112590425;rs1158345	2	rs112590425;rs1158345
1566	rs1487944	21	21675326	3.05638e-08	21653999	21721121	29	1	1	rs1487944	1	rs1487944
1567	rs11909317	21	23172064	7.66696e-38	23169125	23239087	30	15	1	rs11909317	1	rs11909317
1568	rs11088946	21	24303762	1.40371e-19	24281756	24621705	45	2	2	rs11088946;rs2827916	2	rs11088946;rs2827916
1569	rs62215996	21	28318748	9.74845e-84	28272603	28375196	15	2	1	rs62215996	1	rs62215996
1570	rs243736	21	29151802	6.27648e-166	28974299	29278978	26	2	2	rs75729108;rs243736	2	rs75729108;rs243736
1571	rs12482068	21	32270407	1.7211e-11	32270407	32276738	3	1	1	rs12482068	1	rs12482068
1572	rs11701218	21	32864122	1.00642e-52	32861857	32919271	6	1	1	rs11701218	1	rs11701218
1573	rs2833876	21	33917903	1.81269e-11	33912273	33926052	5	1	1	rs2833876	1	rs2833876
1574	rs9305523	21	34545377	4.43637e-68	34512979	34572675	7	2	2	rs4817537;rs9305523	2	rs4817537;rs9305523
1575	rs4817629	21	35645539	3.78166e-86	35613187	35937332	26	4	3	rs4817629;rs4817648;rs2834526	3	rs4817629;rs4817648;rs2834526
1576	rs1235287	21	37013592	1.99754e-23	36914238	37050979	52	2	1	rs1235287	1	rs1235287
1577	rs11700511	21	38723262	1e-200	38723262	38798002	14	1	1	rs11700511	1	rs11700511
1578	rs67684072	21	41207183	9.34416e-09	41121164	41217041	38	2	1	rs67684072	1	rs67684072
1579	rs10439624	21	42483462	2.27245e-14	42287087	42483462	14	2	2	rs10222063;rs10439624	2	rs10222063;rs10439624
1580	rs9985159	21	42848684	1.31893e-33	42845970	42859876	7	1	1	rs9985159	1	rs9985159
1581	rs8133610	21	45513545	3.18112e-23	45433031	45585633	52	3	1	rs8133610	1	rs8133610
1582	rs4143368	21	46358857	1.49065e-11	46358857	46409014	11	3	1	rs4143368	1	rs4143368
1583	rs3088147	21	46792372	1.798e-12	46785143	46806481	12	1	1	rs3088147	1	rs3088147
1584	rs117199891	22	17780188	3.8858e-36	17780188	17788328	2	1	1	rs117199891	1	rs117199891
1585	rs5760263	22	24611330	7.44342e-27	24150044	24611330	76	2	2	rs9612459;rs5760263	2	rs9612459;rs5760263
1586	rs5760782	22	25392832	2.69803e-18	25385875	25413076	5	1	1	rs5760782	1	rs5760782
1587	rs9625525	22	29053009	6.75383e-108	28318192	29160437	126	23	1	rs9625525	1	rs9625525
1588	rs134583	22	29465677	1.91704e-12	29463089	29519142	67	41	1	rs134583	1	rs134583
1589	rs1807691	22	31046315	1.14119e-09	31027114	31046315	2	1	1	rs1807691	1	rs1807691
1590	rs62229375	22	34655528	1.37244e-40	34645946	34795229	58	36	1	rs62229375	1	rs62229375
1591	rs8140093	22	36853963	1.45953e-58	36833193	36881432	8	1	1	rs8140093	1	rs8140093
1592	rs5757601	22	39671534	1.1166e-15	39663150	39737877	17	1	1	rs5757601	1	rs5757601
1593	rs138041	22	40621645	1.26932e-08	40544337	40694170	48	1	1	rs138041	1	rs138041
1594	rs9607885	22	42578596	5.47181e-84	42420807	42678908	126	2	2	rs9607885;rs17002876	1	rs9607885
1595	rs1076933	22	45198494	6.69234e-170	45197080	45261890	21	3	2	rs1076933;rs9626255	2	rs1076933;rs9626255
1596	rs5767410	22	47309007	3.268e-45	47307828	47337922	14	3	1	rs5767410	1	rs5767410
1597	rs9615846	22	48658962	1.62647e-68	48658962	48849233	4	2	2	rs9615846;rs9615326	2	rs9615846;rs9615326
1598	rs5770422	22	49818305	9.54157e-11	49810730	49818305	3	1	1	rs5770422	1	rs5770422
1599	rs138234	22	50560372	3.54759e-39	50511402	50571160	27	23	1	rs138234	1	rs138234
	Abbreviations: FUMA Functional Mapping and Annotation of Genome-Wide Association Studies [1], SNP Single Nucleotide Polymorphism, CHR: Chromosome, BP Base Pair, EAF Effect Allele Frequency, SE Standard Error
	References
	1. Watanabe, K, et al. Functional mapping and annotation of genetic associations with FUMA. Nat. Commun. 2017;8(1):1826.

## Sheet: Supplementatry Table 6
Supplementary Table 6. Lead multivariate CKM GWAS (mvCKM) SNPs annotated in the five input GWASs
mvIR													HF										CHD										STROKE										WHR*
GWAS	Novel SNP	SNP	Chr	Pos	Nearest gene	Genomic locus	Effect allele	Other allele	MAF	Beta	SE	Pvalue	GWAS	SNP	Chr	Pos	Effect allele	Other allele	Beta	SE	Pvalue		GWAS	SNP	Chr	Pos	Effect allele	Other allele	Beta	SE	Pvalue		GWAS	SNP	Chr	Pos	Effect allele	Other allele	Beta	SE	Pvalue		GWAS	SNP	Chr	Pos	Effect allele	Other allele	Beta
mvCKM	YES	rs111739932	1	797325	LINC01128	1	C	T	0.0745527	-0.498225	0.0166503	9.93913e-197	HF	rs7895723	10	57179890	T	C	0.0161	0.01	0.1074		CHD	rs111739932	1	797325	T	C	0.040069	0.0294968	0.174331		STROKE	rs111739932	1	797325	C	T	0.0214	0.0228	0.3482		T2D	rs111739932	1	797325	C	T	-0.016
mvCKM	YES	rs3766180	1	1478153	SSU72	2	C	T	0.306163	-0.030634	0.00406004	4.51426e-14	HF	rs2860840	10	96495232	T	C	-0.001	0.0081	0.9049		CHD	rs3766180	1	1478153	T	C	0.00481	0.0103522	0.642194		STROKE	rs3766180	1	1478153	C	T	-0.0024	0.0092	0.7926		T2D	rs3766180	1	1478153	C	T	-0.0091
mvCKM	YES	rs61277936	1	2390715	PLCH2	3	G	C	0.49503	-0.0271682	0.00402269	1.44078e-11	HF	rs10790025	11	114439662	C	G	-0.008	0.0089	0.3679		CHD	rs61277936	1	2390715	C	G	0.002411	0.0107715	0.822889		STROKE	rs61277936	1	2390715	G	C	0.0102	0.0089	0.252		T2D	rs61277936	1	2390715	G	C	0.0238
mvCKM	YES	rs35329253	1	3820486	LINC01134	4	G	C	0.298211	-0.018259	0.00292759	4.46451e-10	HF	rs3920862	11	34795679	A	T	0.0041	0.0141	0.7739		CHD	rs35329253	1	3820486	C	G	-0.01668	0.0110659	0.131726		STROKE	rs35329253	1	3820486	G	C	-0.0049	0.0092	0.5945		T2D	rs35329253	1	3820486	G	C	-0.0538
mvCKM	YES	rs7526903	1	4006671	RP13-614K11.1	4	A	G	0.370775	-0.036724	0.00313188	9.39466e-32	HF	rs12423666	12	62184406	A	G	-0.0067	0.0121	0.577		CHD	rs7526903	1	4006671	G	A	-0.01378	0.0096146	0.151792		STROKE	rs7526903	1	4006671	A	G	-0.0046	0.0084	0.5833		T2D	rs7526903	1	4006671	A	G	0.0501
mvCKM	YES	rs4478781	1	4086827	RP13-614K11.1	4	T	C	0.161034	0.0837792	0.00557907	5.70936e-51	HF	rs7300177	12	90864963	A	C	0.0021	0.0081	0.7959		CHD	rs4478781	1	4086827	C	T	0.010694	0.0135904	0.431353		STROKE	rs4478781	1	4086827	T	C	0.0044	0.0116	0.7051		T2D	rs4478781	1	4086827	T	C	-0.003
mvCKM	YES	rs989310	1	4771695	AJAP1	5	C	G	0.451292	0.0679587	0.0039619	5.9623e-66	HF	rs690107	15	54108161	A	C	0.0025	0.0109	0.8159		CHD	rs989310	1	4771695	G	C	-0.008627	0.0112571	0.443462		STROKE	rs989310	1	4771695	C	G	-0.0017	0.009	0.8476		T2D	rs989310	1	4771695	C	G	-0.0017
mvCKM	YES	rs7547299	1	5025243	RP11-542C10.1	6	T	C	0.195825	-0.110078	0.00593089	6.75089e-77	HF	rs2060274	19	19543271	T	C	0.0013	0.0106	0.905		CHD	rs7547299	1	5025243	C	T	-0.010197	0.0131168	0.436923		STROKE	rs7547299	1	5025243	T	C	-0.0011	0.0112	0.9236		T2D	rs7547299	1	5025243	T	C	0.0073
mvCKM	YES	rs7525854	1	5123611	RP11-542C10.1	6	T	C	0.239563	0.0809025	0.00501938	1.90617e-58	HF	rs6065781	20	43712809	T	C	0.0054	0.0103	0.5968		CHD	rs7525854	1	5123611	C	T	0.012325	0.0110724	0.265655		STROKE	rs7525854	1	5123611	T	C	-0.0056	0.0097	0.5627		T2D	rs7525854	1	5123611	T	C	0.022
mvCKM	YES	rs36010087	1	5899314	AL356693.1	7	C	T	0.125249	-0.0280243	0.00478779	4.81965e-09	HF	rs11905645	20	54381566	T	C	0.0087	0.0098	0.374		CHD	rs36010087	1	5899314	T	C	-0.0052	0.0168764	0.757989		STROKE	rs36010087	1	5899314	C	T	0.0343	0.0145	0.0176498		T2D	rs36010087	1	5899314	C	T	-0.0468
mvCKM	YES	rs4908696	1	6074434	KCNAB2	7	G	A	0.172962	-0.0184374	0.00256894	7.12417e-13	HF	rs7731573	5	12156978	C	G	-0.004	0.0082	0.6273		CHD	rs4908696	1	6074434	A	G	0.001216	0.0135883	0.928693		STROKE	rs4908696	1	6074434	G	A	-0.0066	0.0117	0.5711		T2D	rs4908696	1	6074434	G	A	-0.0065
mvCKM	YES	rs12402363	1	11921243	NPPB	8	G	A	0.293241	0.13098	0.00471895	1.46748e-169	HF	rs10471569	5	62363442	A	C	-0.0054	0.0095	0.5728		CHD	rs12402363	1	11921243	A	G	0.012118	0.010488	0.247921		STROKE	rs12402363	1	11921243	G	A	-0.0105	0.0091	0.2475		T2D	rs12402363	1	11921243	G	A	-0.0076
mvCKM	YES	rs6429817	1	14314025	RNU6-1265P	9	A	C	0.250497	0.020924	0.00258294	5.45866e-16	HF	rs1860704	7	119927993	A	G	0.0103	0.0101	0.3087		CHD	rs6429817	1	14314025	C	A	-0.011043	0.0101654	0.277331		STROKE	rs6429817	1	14314025	A	C	0.0027	0.0087	0.7511		T2D	rs6429817	1	14314025	A	C	-0.0041
mvCKM	YES	rs10927478	1	14969869	KAZN	10	C	T	0.227634	0.0269013	0.00271507	3.83737e-23	HF	rs4872354	8	25639033	A	T	-0.0035	0.0088	0.6889		CHD	rs10927478	1	14969869	T	C	0.004207	0.0108541	0.698314		STROKE	rs10927478	1	14969869	C	T	-0.0009	0.0093	0.9211		T2D	rs10927478	1	14969869	C	T	0.0498
mvCKM	YES	rs12563699	1	15553395	TMEM51	11	C	G	0.167992	0.0379637	0.00327302	4.17016e-31	HF	rs10504637	8	77652174	T	C	-0.0106	0.0108	0.3245		CHD	rs12563699	1	15553395	G	C	0.003404	0.0122586	0.781257		STROKE	rs12563699	1	15553395	C	G	-0.0406	0.0101	5.44603e-05		T2D	rs12563699	1	15553395	C	G	-0.0086
mvCKM	YES	rs1980607	1	15975237	DDI2	12	G	A	0.26839	-0.0975475	0.00289355	1e-200	HF	rs1330187	9	103711370	T	G	-0.009	0.0083	0.2742		CHD	rs1980607	1	15975237	A	G	-0.017691	0.0104956	0.0918798		STROKE	rs1980607	1	15975237	G	A	-0.0075	0.009	0.4094		T2D	rs1980607	1	15975237	G	A	0.0164
mvCKM	YES	rs4661349	1	16411150	FAM131C	13	G	A	0.328032	-0.0278165	0.00296854	7.22497e-21	HF	rs12253246	10	111108445	A	C	-0.0054	0.0125	0.6676		CHD	rs4661349	1	16411150	A	G	0.02276	0.0123803	0.0660024		STROKE	rs4661349	1	16411150	G	A	0.0241	0.0104	0.0209402		T2D	rs4661349	1	16411150	G	A	0.0137
mvCKM	YES	rs7516087	1	17393889	PADI2	14	G	A	0.300199	0.0696845	0.00429851	4.19612e-59	HF	rs10883035	10	99845573	A	G	0.0215	0.0081	0.008207		CHD	rs7516087	1	17393889	A	G	0.012893	0.009758	0.186411		STROKE	rs7516087	1	17393889	G	A	0.0028	0.0083	0.7374		T2D	rs7516087	1	17393889	G	A	-0.0154
mvCKM	YES	rs4920636	1	18098709	ACTL8	15	T	C	0.345924	0.00212451	0.000376183	1.62769e-08	HF	rs539360	11	59839682	A	C	0.0068	0.0086	0.4313		CHD	rs4920636	1	18098709	C	T	-0.011438	0.0101404	0.259336		STROKE	rs4920636	1	18098709	T	C	-0.0042	0.0084	0.6192		T2D	rs4920636	1	18098709	T	C	-0.0045
mvCKM	YES	rs733813	1	18907484	RP1-8B22.2	16	G	A	0.481113	0.0618893	0.00362614	2.58924e-65	HF	rs11213783	11	97919121	T	C	0.0003	0.0116	0.9784		CHD	rs733813	1	18907484	A	G	-0.001971	0.0095419	0.836351		STROKE	rs733813	1	18907484	G	A	0.0006	0.0086	0.9432		T2D	rs733813	1	18907484	G	A	-0.0255
mvCKM	YES	rs6426613	1	20480668	RP3-340N1.2	17	T	G	0.331014	-0.0597768	0.00369237	6.00452e-59	HF	rs12426190	12	126240559	T	G	-0.0034	0.0118	0.7711		CHD	rs6426613	1	20480668	G	T	-0.010039	0.0098938	0.310262		STROKE	rs6426613	1	20480668	T	G	-0.0097	0.0085	0.2535		T2D	rs6426613	1	20480668	T	G	-0.0104
mvCKM	YES	rs10916814	1	20892931	FAM43B	18	T	C	0.269384	-0.0594508	0.00312051	6.36621e-81	HF	rs983220	13	61647320	A	G	0.0096	0.0078	0.2194		CHD	rs10916814	1	20892931	C	T	-0.011088	0.010286	0.281046		STROKE	rs10916814	1	20892931	T	C	0.0005	0.0087	0.9505		T2D	rs10916814	1	20892931	T	C	0.0201
mvCKM	YES	rs11577267	1	21436381	EIF4G3	18	A	G	0.422465	-0.0017996	0.000273336	4.58498e-11	HF	rs1373	14	100808510	A	T	0.0132	0.0089	0.1385		CHD	rs11577267	1	21436381	G	A	0.013729	0.0093203	0.140744		STROKE	rs11577267	1	21436381	A	G	0.0014	0.0081	0.8614		T2D	rs11577267	1	21436381	A	G	0.0403
mvCKM	YES	rs829412	1	21953436	RAP1GAP	19	G	A	0.16998	0.0911445	0.00475273	5.72799e-82	HF	rs8013268	14	33668748	T	C	0.0086	0.01	0.3897		CHD	rs829412	1	21953436	A	G	-0.005906	0.0134025	0.659456		STROKE	rs829412	1	21953436	G	A	-0.0048	0.0114	0.672901		T2D	rs829412	1	21953436	G	A	-0.0623
mvCKM	YES	rs209729	1	22835677	ZBTB40	20	G	A	0.2833	-0.0271323	0.0025417	1.33436e-26	HF	rs4243262	18	40157434	T	C	-0.0202	0.0092	0.02848		CHD	rs209729	1	22835677	A	G	0.013986	0.0103837	0.178008		STROKE	rs209729	1	22835677	G	A	0.0096	0.0097	0.321		T2D	rs209729	1	22835677	G	A	0.0064
mvCKM	YES	rs487859	1	23801101	ASAP3	21	C	T	0.09841	0.0502569	0.00520844	4.95712e-22	HF	rs2827916	21	24523039	T	G	-0.0008	0.0109	0.9393		CHD	rs487859	1	23801101	T	C	0.010467	0.0155392	0.500574		STROKE	rs487859	1	23801101	C	T	0.0021	0.0131	0.8717		T2D	rs487859	1	23801101	C	T	0.0106
mvCKM	YES	rs34804209	1	24716204	STPG1	22	T	C	0.10835	0.0619117	0.0064581	9.09723e-22	HF	rs9656282	7	121078042	T	C	-0.0025	0.0089	0.7826		CHD	rs34804209	1	24716204	C	T	-0.005456	0.015197	0.719582		STROKE	rs34804209	1	24716204	T	C	0.0147	0.013	0.2581		T2D	rs34804209	1	24716204	T	C	0.0287
mvCKM	YES	rs298442	1	26301699	PAFAH2	23	T	C	0.198807	0.144729	0.00500427	6.46138e-184	HF	rs10254609	7	124348657	T	C	-0.0017	0.009	0.8539		CHD	rs298442	1	26301699	C	T	-0.043855	0.0119241	0.000235201		STROKE	rs298442	1	26301699	T	C	-0.0104	0.01	0.3004		T2D	rs298442	1	26301699	T	C	-0.0293
mvCKM	YES	rs35874489	1	27412149	SLC9A1	24	A	G	0.377734	0.000382655	6.93203e-05	3.38793e-08	HF	rs846311	7	42129181	C	G	0.0073	0.0092	0.4288		CHD	rs35874489	1	27412149	G	A	-0.00698	0.0104141	0.502704		STROKE	rs35874489	1	27412149	A	G	0.0036	0.0087	0.6807		T2D	rs35874489	1	27412149	A	G	0.0199
mvCKM	YES	rs471099	1	29444720	EPB41	25	G	A	0.272366	0.0242099	0.00415567	5.6856e-09	HF	rs2270376	8	38033989	C	G	0.0071	0.0089	0.4281		CHD	rs471099	1	29444720	A	G	-0.010675	0.010853	0.325313		STROKE	rs471099	1	29444720	G	A	-0.0197	0.0095	0.0392799		T2D	rs471099	1	29444720	G	A	-0.0059
mvCKM	YES	rs12046213	1	29513323	SRSF4	25	A	G	0.0874751	0.0472319	0.00663245	1.06888e-12	HF	rs9411164	9	78910139	A	G	0.0057	0.0092	0.5379		CHD	rs12046213	1	29513323	G	A	-0.011105	0.0137088	0.417904		STROKE	rs12046213	1	29513323	A	G	-0.0092	0.012	0.4432		T2D	rs12046213	1	29513323	A	G	-0.0112
mvCKM	YES	rs746564	1	30509199	RP11-111I12.1	26	G	A	0.321074	-0.0233917	0.00328468	1.06783e-12	HF	rs9338708	10	32752511	A	G	0.0125	0.0088	0.155		CHD	rs746564	1	30509199	A	G	0.000876	0.0098047	0.928808		STROKE	rs746564	1	30509199	G	A	-0.0062	0.0085	0.4678		T2D	rs746564	1	30509199	G	A	0.001
mvCKM	YES	rs3766296	1	31820223	ZCCHC17	27	A	G	0.387674	-0.0342395	0.0031023	2.53894e-28	HF	rs2715791	11	113683860	T	C	-0.0228	0.0116	0.05		CHD	rs3766296	1	31820223	G	A	-0.003337	0.0095201	0.725949		STROKE	rs3766296	1	31820223	A	G	-0.0113	0.0083	0.1734		T2D	rs3766296	1	31820223	A	G	-0.0077
mvCKM	YES	rs4448564	1	32013637	RP11-73M7.1	27	C	A	0.219682	-0.0265653	0.00433938	9.24592e-10	HF	rs11063452	12	5107548	A	G	-0.0009	0.0079	0.9081		CHD	rs4448564	1	32013637	A	C	0.003582	0.0113885	0.753121		STROKE	rs4448564	1	32013637	C	A	-0.0115	0.0098	0.2421		T2D	rs4448564	1	32013637	C	A	-0.0042
mvCKM	YES	rs80067291	1	34899796	RP4-657M3.2	28	T	C	0.144135	0.0394635	0.00329928	5.67048e-33	HF	rs12585633	13	90265129	A	T	0.004	0.0103	0.6994		CHD	rs80067291	1	34899796	C	T	-0.011741	0.0120403	0.329491		STROKE	rs80067291	1	34899796	T	C	0.0174	0.011	0.1132		T2D	rs80067291	1	34899796	T	C	0.0302
mvCKM	YES	rs1418483	1	34997944	MIR552	28	A	G	0.446322	0.000700208	4.45847e-05	1.39515e-55	HF	rs16960916	15	35719880	C	G	0.0146	0.0094	0.1219		CHD	rs1418483	1	34997944	G	A	-0.001257	0.0096233	0.896076		STROKE	rs1418483	1	34997944	A	G	-0.0042	0.0081	0.604		T2D	rs1418483	1	34997944	A	G	-0.008
mvCKM	YES	rs4653185	1	36861854	LSM10	29	C	A	0.299205	-0.0387719	0.00392909	5.73363e-23	HF	rs9921177	16	72336481	C	G	0.0055	0.0097	0.5679		CHD	rs4653185	1	36861854	A	C	-0.005588	0.0100883	0.57964		STROKE	rs4653185	1	36861854	C	A	0.0169	0.0083	0.0418504		T2D	rs4653185	1	36861854	C	A	-0.0228
mvCKM	YES	rs112215807	1	40384298	MYCL	30	T	G	0.119284	-0.074182	0.00750279	4.72796e-23	HF	rs2973972	5	119260346	A	T	0.0105	0.0112	0.35		CHD	rs112215807	1	40384298	G	T	0.0065	0.0181691	0.72053		STROKE	rs112215807	1	40384298	T	G	-0.0217	0.0159	0.1728		T2D	rs112215807	1	40384298	T	G	-0.0085
mvCKM	YES	rs2744799	1	41185534	NFYC	31	C	A	0.217694	-0.0583965	0.00356044	1.86641e-60	HF	rs2302147	7	156469133	C	G	0.0052	0.0082	0.5298		CHD	rs2744799	1	41185534	A	C	0.000558	0.010501	0.957622		STROKE	rs2744799	1	41185534	C	A	0.0005	0.0092	0.9579		T2D	rs2744799	1	41185534	C	A	-0.0052
mvCKM	YES	rs12071990	1	41902954	RNA5SP45	32	C	T	0.10338	0.0414049	0.00349468	2.20474e-32	HF	rs4412351	8	125102535	C	G	0.0023	0.0115	0.8409		CHD	rs12071990	1	41902954	T	C	0.01676	0.0137729	0.22365		STROKE	rs12071990	1	41902954	C	T	0.0297	0.0123	0.0155299		T2D	rs12071990	1	41902954	C	T	-0.0111
mvCKM	YES	rs12081092	1	43081293	CCDC30	33	A	C	0.319085	-0.0306207	0.00359309	1.5666e-17	HF	rs1919343	8	35158920	T	G	-0.0115	0.0106	0.2774		CHD	rs12081092	1	43081293	C	A	-0.010958	0.0100568	0.275882		STROKE	rs12081092	1	43081293	A	C	-0.0033	0.0093	0.7219		T2D	rs12081092	1	43081293	A	C	-0.009
mvCKM	YES	rs12718444	1	43409179	SLC2A1	33	T	G	0.164016	-1.82908	0.0139265	1e-200	HF	rs2700786	8	5832225	T	C	-0.0016	0.0083	0.8483		CHD	rs12718444	1	43409179	G	T	-0.01005	0.0118915	0.398031		STROKE	rs12718444	1	43409179	T	G	0.0013	0.0101	0.8961		T2D	rs12718444	1	43409179	T	G	0.0025
mvCKM	YES	rs9660387	1	44904460	RNF220	34	A	G	0.269384	-0.035085	0.00369009	1.94571e-21	HF	rs4300063	9	121384794	A	G	0.0024	0.0079	0.7627		CHD	rs9660387	1	44904460	G	A	0.002426	0.0103414	0.814526		STROKE	rs9660387	1	44904460	A	G	-0.004	0.0089	0.6514		T2D	rs9660387	1	44904460	A	G	0.0111
mvCKM	YES	rs111699884	1	46814329	NSUN4	35	C	T	0.272366	-0.0492081	0.00376307	4.47997e-39	HF	rs1871145	12	21706282	T	G	0.0133	0.0096	0.1662		CHD	rs111699884	1	46814329	T	C	0.018852	0.0112701	0.0943778		STROKE	rs111699884	1	46814329	C	T	0.003	0.0097	0.753701		T2D	rs111699884	1	46814329	C	T	-0.0021
mvCKM	YES	rs11211428	1	47517591	CYP4X1	36	G	A	0.295229	-0.0205105	0.00299385	7.33958e-12	HF	rs2619483	12	25702667	A	T	-0.0079	0.0111	0.4769		CHD	rs11211428	1	47517591	A	G	-0.003331	0.0102632	0.745514		STROKE	rs11211428	1	47517591	G	A	-0.0084	0.0104	0.4218		T2D	rs11211428	1	47517591	G	A	0.0029
mvCKM	YES	rs576891	1	53364976	ECHDC2	37	G	A	0.367793	0.0257509	0.00308002	6.23895e-17	HF	rs10858961	12	90525851	T	G	-0.0032	0.0098	0.7463		CHD	rs576891	1	53364976	A	G	-0.001426	0.0097015	0.883142		STROKE	rs576891	1	53364976	G	A	-0.0003	0.0084	0.9695		T2D	rs576891	1	53364976	G	A	0.0055
mvCKM	YES	rs34203701	1	53573841	SLC1A7	37	A	G	0.0994036	0.0444004	0.00523381	2.18766e-17	HF	rs12148828	15	63355339	T	C	-0.0014	0.0078	0.8547		CHD	rs34203701	1	53573841	G	A	0.000947	0.0176368	0.957178		STROKE	rs34203701	1	53573841	A	G	0.0048	0.0151	0.750501		T2D	rs34203701	1	53573841	A	G	-0.0896
mvCKM	YES	rs2404210	1	53603796	SLC1A7	37	A	G	0.258449	0.0166902	0.00228806	2.9978e-13	HF	rs999475	17	46988044	A	G	-0.0278	0.0087	0.001352		CHD	rs2404210	1	53603796	G	A	-0.008483	0.010702	0.427979		STROKE	rs2404210	1	53603796	A	G	0.0037	0.0089	0.68		T2D	rs2404210	1	53603796	A	G	-0.0117
mvCKM	YES	rs11206197	1	54165831	GLIS1	38	G	A	0.2167	0.0233055	0.00338388	5.69008e-12	HF	rs4803284	19	40162593	A	T	-0.002	0.009	0.8227		CHD	rs11206197	1	54165831	A	G	-0.002862	0.0112897	0.799878		STROKE	rs11206197	1	54165831	G	A	0.0049	0.0093	0.6017		T2D	rs11206197	1	54165831	G	A	0.0096
mvCKM	YES	rs12564882	1	54794930	SSBP3	39	G	A	0.148111	0.0881118	0.00633991	6.51856e-44	HF	rs3810392	19	40257034	T	G	0.0026	0.0112	0.8166		CHD	rs12564882	1	54794930	A	G	0.013153	0.0117633	0.263508		STROKE	rs12564882	1	54794930	G	A	-0.0194	0.01	0.0530897		T2D	rs12564882	1	54794930	G	A	0.0378
mvCKM	YES	rs72669957	1	55156195	MROH7-TTC4:MROH7	40	G	C	0.153082	-0.10424	0.00621672	4.20313e-63	HF	rs3789343	20	13498547	T	C	-0.0046	0.0091	0.6162		CHD	rs72669957	1	55156195	C	G	-0.008537	0.0127279	0.502392		STROKE	rs72669957	1	55156195	G	C	0.0033	0.0108	0.758501		T2D	rs72669957	1	55156195	G	C	0.0114
mvCKM	YES	rs10888935	1	56060951	RP11-466L17.1	41	A	T	0.412525	-0.0470236	0.00433379	1.98426e-27	HF	rs2206461	20	7837676	T	C	-0.0003	0.0091	0.9723		CHD	rs10888935	1	56060951	T	A	9e-06	0.0093376	0.999231		STROKE	rs10888935	1	56060951	A	T	-0.0012	0.008	0.8786		T2D	rs10888935	1	56060951	A	T	-0.0401
mvCKM	No_CHD	rs17114046	1	56966350	PPAP2B	42	G	A	0.11829	-0.141406	0.0067003	7.25451e-99	HF	rs17702888	5	143958077	T	C	-0.0004	0.0093	0.9687		CHD	rs17114046	1	56966350	A	G	-0.124895	0.0166374	6.06038e-14		STROKE	rs17114046	1	56966350	G	A	-0.022	0.0144	0.1272		T2D	rs17114046	1	56966350	G	A	-0.022
mvCKM	YES	rs6668521	1	57270371	C1orf168	43	C	T	0.228628	0.0326744	0.00491742	3.03989e-11	HF	rs2216752	5	96185467	A	G	0.0052	0.0088	0.5546		CHD	rs6668521	1	57270371	T	C	0.002274	0.0110974	0.837641		STROKE	rs6668521	1	57270371	C	T	0.0046	0.0096	0.6313		T2D	rs6668521	1	57270371	C	T	0.0183
mvCKM	YES	rs12744510	1	59113961	MYSM1	44	T	C	0.328032	-0.0344066	0.00533729	1.14498e-10	HF	rs3133969	8	110752859	A	C	-0.0062	0.0105	0.5538		CHD	rs12744510	1	59113961	C	T	-0.005944	0.0098091	0.544535		STROKE	rs12744510	1	59113961	T	C	0.0122	0.0085	0.1507		T2D	rs12744510	1	59113961	T	C	0.0169
mvCKM	YES	rs645936	1	60571334	PGBD4P8	45	A	T	0.152087	0.000976083	0.000154321	2.5318e-10	HF	rs7832832	8	140158651	T	C	0.0174	0.0086	0.04423		CHD	rs645936	1	60571334	T	A	-0.005282	0.0125737	0.674424		STROKE	rs645936	1	60571334	A	T	0.0147	0.0102	0.1514		T2D	rs645936	1	60571334	A	T	0.021
mvCKM	YES	rs34668815	1	61192846	RP11-436K8.1	46	T	A	0.269384	-0.00147088	0.000240349	9.36978e-10	HF	rs10086609	8	91856154	C	G	0.0122	0.0091	0.1808		CHD	rs34668815	1	61192846	A	T	0.031482	0.0111083	0.00459547		STROKE	rs34668815	1	61192846	T	A	-0.0003	0.0099	0.9761		T2D	rs34668815	1	61192846	T	A	0.0228
mvCKM	YES	rs1779868	1	61476048	NFIA	46	A	G	0.452286	0.0209054	0.00337313	5.73212e-10	HF	rs9539969	13	64749441	A	G	-0.0047	0.008	0.5581		CHD	rs1779868	1	61476048	G	A	0.004064	0.009481	0.668181		STROKE	rs1779868	1	61476048	A	G	0.0062	0.0079	0.4306		T2D	rs1779868	1	61476048	A	G	-0.0066
mvCKM	YES	rs4650292	1	69479427	RP11-424D14.1	47	A	G	0.269384	0.000808752	0.000115386	2.39876e-12	HF	rs8009933	14	39600212	A	G	-0.0074	0.0083	0.3726		CHD	rs4650292	1	69479427	G	A	-0.002498	0.0104522	0.811111		STROKE	rs4650292	1	69479427	A	G	-0.0064	0.0087	0.4659		T2D	rs4650292	1	69479427	A	G	-0.0047
mvCKM	YES	rs11209505	1	70097194	LRRC7	48	G	A	0.306163	-0.0333739	0.00401637	9.6137e-17	HF	rs4904831	14	92517355	T	C	0.0002	0.009	0.9838		CHD	rs11209505	1	70097194	A	G	0.011015	0.0101306	0.276906		STROKE	rs11209505	1	70097194	G	A	-0.0011	0.0086	0.8955		T2D	rs11209505	1	70097194	G	A	0.0135
mvCKM	YES	rs17131332	1	70994595	RP11-42O15.2	49	A	G	0.124254	0.0972768	0.00587969	1.75286e-61	HF	rs4368156	16	56874272	C	G	-0.0114	0.0099	0.2476		CHD	rs17131332	1	70994595	G	A	0.006369	0.0134546	0.63595		STROKE	rs17131332	1	70994595	A	G	0.0004	0.011	0.9735		T2D	rs17131332	1	70994595	A	G	0.0037
mvCKM	YES	rs1830201	1	71786220	ZRANB2-AS2	50	A	G	0.17495	-0.027087	0.00398007	1.00596e-11	HF	rs4789253	17	74220591	A	G	-0.0221	0.0147	0.1317		CHD	rs1830201	1	71786220	G	A	-0.00401	0.0112202	0.720799		STROKE	rs1830201	1	71786220	A	G	0.0151	0.0097	0.1196		T2D	rs1830201	1	71786220	A	G	0.0285
mvCKM	YES	rs17592080	1	74674694	FPGT:FPGT-TNNI3K:TNNI3K	51	A	G	0.0914513	0.059223	0.00765217	9.99111e-15	HF	rs4941060	18	59477259	A	T	0.0012	0.0093	0.8949		CHD	rs17592080	1	74674694	G	A	0.036039	0.0161508	0.0256543		STROKE	rs17592080	1	74674694	A	G	0.0045	0.0139	0.7465		T2D	rs17592080	1	74674694	A	G	0.007
mvCKM	YES	rs2065730	1	75414744	RP11-93N20.1	52	A	C	0.189861	0.0329709	0.00466101	1.50781e-12	HF	rs9607885	22	42578596	T	C	0.0267	0.0096	0.0052		CHD	rs2065730	1	75414744	C	A	0.009389	0.0108747	0.38793		STROKE	rs2065730	1	75414744	A	C	-0.0101	0.0095	0.291		T2D	rs2065730	1	75414744	A	C	-0.0215
mvCKM	YES	rs4949841	1	75765593	SLC44A5	52	T	C	0.353877	0.071022	0.00466014	1.90974e-52	HF	rs31590	5	131005181	A	G	-0.0167	0.01	0.09549		CHD	rs4949841	1	75765593	C	T	-0.007137	0.0102056	0.48435		STROKE	rs4949841	1	75765593	T	C	-0.0014	0.0088	0.8751		T2D	rs4949841	1	75765593	T	C	0.0048
mvCKM	YES	rs1159214	1	76317910	MSH4	53	T	G	0.261431	0.0556408	0.00425394	4.293e-39	HF	rs9688196	5	67430335	T	C	-0.0167	0.008	0.03736		CHD	rs1159214	1	76317910	G	T	-0.01044	0.0112267	0.352409		STROKE	rs1159214	1	76317910	T	G	0.0077	0.0098	0.4323		T2D	rs1159214	1	76317910	T	G	-0.0137
mvCKM	YES	rs4300269	1	76751466	ST6GALNAC3	54	G	A	0.44831	-0.0155588	0.00279236	2.51974e-08	HF	rs1929910	9	83311763	T	C	-0.0115	0.0099	0.2426		CHD	rs4300269	1	76751466	A	G	-0.002946	0.0093257	0.752078		STROKE	rs4300269	1	76751466	G	A	-0.0132	0.0081	0.1015		T2D	rs4300269	1	76751466	G	A	-0.0161
mvCKM	YES	rs1357331	1	77348936	ST6GALNAC5	55	A	G	0.486083	0.101097	0.00411757	4.05653e-133	HF	rs4756755	11	13158471	T	C	0.0048	0.0082	0.5539		CHD	rs1357331	1	77348936	G	A	0.024621	0.0094919	0.00948943		STROKE	rs1357331	1	77348936	A	G	0.0131	0.0083	0.1159		T2D	rs1357331	1	77348936	A	G	0.0078
mvCKM	YES	rs11162255	1	77514203	ST6GALNAC5	55	C	T	0.0944334	0.0486512	0.00398791	3.12105e-34	HF	rs11049949	12	29108955	A	T	-0.0077	0.0111	0.4878		CHD	rs11162255	1	77514203	T	C	-0.003508	0.0127116	0.782573		STROKE	rs11162255	1	77514203	C	T	0.007	0.0112	0.5331		T2D	rs11162255	1	77514203	C	T	-0.0294
mvCKM	YES	rs1475399	1	79210598	RP4-641G12.4	56	G	A	0.145129	-0.0340981	0.00434799	4.42431e-15	HF	rs10777200	12	90172940	T	C	-0.0279	0.0086	0.001125		CHD	rs1475399	1	79210598	A	G	0.031752	0.0136632	0.0201308		STROKE	rs1475399	1	79210598	G	A	-0.005	0.0119	0.675		T2D	rs1475399	1	79210598	G	A	0.0029
mvCKM	YES	rs17414106	1	79438696	ELTD1	56	G	A	0.137177	0.173404	0.00609663	6.0056e-178	HF	rs9520225	13	107516667	T	C	-0.0055	0.0093	0.5558		CHD	rs17414106	1	79438696	A	G	0.007619	0.0145333	0.600109		STROKE	rs17414106	1	79438696	G	A	0.0027	0.0124	0.8301		T2D	rs17414106	1	79438696	G	A	-0.0016
mvCKM	YES	rs1338144	1	81321698	RP5-887A10.1	57	A	T	0.274354	0.0994317	0.00355426	3.24235e-172	HF	rs7988358	13	56485005	A	G	0.0022	0.01	0.827		CHD	rs1338144	1	81321698	T	A	0.009264	0.0105412	0.379491		STROKE	rs1338144	1	81321698	A	T	0.0091	0.009	0.3078		T2D	rs1338144	1	81321698	A	T	-0.0179
mvCKM	YES	rs10874249	1	81946553	LPHN2	58	G	A	0.126243	0.0857348	0.00652011	1.71773e-39	HF	rs339533	13	60538310	A	G	-0.0024	0.0083	0.771		CHD	rs10874249	1	81946553	A	G	-0.024446	0.0129245	0.0585652		STROKE	rs10874249	1	81946553	G	A	0.0009	0.0114	0.9373		T2D	rs10874249	1	81946553	G	A	0.0146
mvCKM	YES	rs942682	1	85346891	LPAR3	59	C	T	0.229622	-0.0357661	0.00335725	1.68123e-26	HF	rs9317478	13	65583733	A	G	0.0031	0.0082	0.7042		CHD	rs942682	1	85346891	T	C	0.002254	0.0123336	0.854992		STROKE	rs942682	1	85346891	C	T	-0.0115	0.01	0.2496		T2D	rs942682	1	85346891	C	T	-0.0049
mvCKM	YES	rs17127710	1	85918009	DDAH1	60	T	C	0.208748	-0.0486838	0.00489439	2.60315e-23	HF	rs1689695	5	19500888	A	G	-0.0203	0.0096	0.03507		CHD	rs17127710	1	85918009	C	T	-0.006779	0.0120327	0.573175		STROKE	rs17127710	1	85918009	T	C	0.0028	0.0095	0.7703		T2D	rs17127710	1	85918009	T	C	-0.0387
mvCKM	YES	rs10493766	1	85945660	DDAH1	60	G	A	0.256461	-0.0946835	0.00486055	1.62352e-84	HF	rs1495098	8	15253752	A	G	0.0047	0.0114	0.6798		CHD	rs10493766	1	85945660	A	G	-0.001146	0.010312	0.911512		STROKE	rs10493766	1	85945660	G	A	0.0029	0.0091	0.7489		T2D	rs10493766	1	85945660	G	A	0.0154
mvCKM	YES	rs6576905	1	87992666	RNA5SP52	61	T	C	0.371769	0.0035456	0.000535277	3.4993e-11	HF	rs1329585	9	32317994	A	C	0.0031	0.0131	0.8105		CHD	rs6576905	1	87992666	C	T	0.014783	0.0093235	0.112839		STROKE	rs6576905	1	87992666	T	C	-0.0052	0.0081	0.5206		T2D	rs6576905	1	87992666	T	C	-0.0206
mvCKM	YES	rs72712401	1	88142950	RP5-1027O11.1	61	G	T	0.12326	0.0648504	0.00491833	1.06392e-39	HF	rs11194511	10	111008513	T	G	-0.0015	0.0089	0.8661		CHD	rs72712401	1	88142950	T	G	-0.013495	0.0144551	0.35052		STROKE	rs72712401	1	88142950	G	T	-0.0191	0.0121	0.1165		T2D	rs72712401	1	88142950	G	T	-0.0459
mvCKM	YES	rs282057	1	91821503	HFM1	62	G	A	0.358847	-0.083883	0.00453861	2.8781e-76	HF	rs3847589	11	32430778	A	T	-0.0134	0.0109	0.2177		CHD	rs282057	1	91821503	A	G	-0.002339	0.0095984	0.807473		STROKE	rs282057	1	91821503	G	A	-0.0109	0.0085	0.2003		T2D	rs282057	1	91821503	G	A	-0.0073
mvCKM	YES	rs4247165	1	92832179	RPAP2	63	G	C	0.192843	1.30891	0.0615219	1.91456e-100	HF	rs9951604	18	71736079	A	C	-0.0052	0.0118	0.6579		CHD	rs4247165	1	92832179	C	G	-0.02464	0.013132	0.0606094		STROKE	rs4247165	1	92832179	G	C	-0.0024	0.0108	0.8221		T2D	rs4247165	1	92832179	G	C	-0.0184
mvCKM	YES	rs859107	1	95315420	SLC44A3:RP11-465K1.2	64	C	T	0.151093	-0.0508379	0.00423613	3.50884e-33	HF	rs10414194	19	28293894	T	C	-0.0084	0.009	0.3506		CHD	rs859107	1	95315420	T	C	0.033779	0.0165277	0.0409751		STROKE	rs859107	1	95315420	C	T	-0.0069	0.0134	0.604399		T2D	rs859107	1	95315420	C	T	-0.0094
mvCKM	YES	rs7534454	1	99800965	LPPR4	65	T	C	0.232604	0.0551854	0.00523224	5.23416e-26	HF	rs1983920	20	22699484	T	C	0.0118	0.0084	0.1599		CHD	rs7534454	1	99800965	C	T	-0.002655	0.0137697	0.847104		STROKE	rs7534454	1	99800965	T	C	-0.0047	0.012	0.6925		T2D	rs7534454	1	99800965	T	C	-0.0146
mvCKM	YES	rs1764447	1	100570806	SASS6	66	C	T	0.144135	0.0203171	0.00305837	3.07136e-11	HF	rs2341179	8	30100766	A	G	-0.0264	0.0144	0.06607		CHD	rs1764447	1	100570806	T	C	0.014231	0.0134927	0.291553		STROKE	rs1764447	1	100570806	C	T	0.0145	0.011	0.1884		T2D	rs1764447	1	100570806	C	T	-0.0145
mvCKM	YES	rs6577215	1	101387780	SLC30A7	67	C	T	0.307157	-0.0220309	0.0037121	2.94015e-09	HF	rs12256432	10	131319445	T	C	0.0063	0.0107	0.5566		CHD	rs6577215	1	101387780	T	C	0.003141	0.0105043	0.764925		STROKE	rs6577215	1	101387780	C	T	-0.0032	0.0089	0.722099		T2D	rs6577215	1	101387780	C	T	0.0023
mvCKM	YES	rs4908204	1	102431521	OLFM3	68	T	G	0.201789	-0.0434936	0.00418438	2.63299e-25	HF	rs1948095	11	98747015	A	C	0.0101	0.0116	0.3862		CHD	rs4908204	1	102431521	G	T	-0.013103	0.0122	0.282815		STROKE	rs4908204	1	102431521	T	G	-0.0171	0.0104	0.0987393		T2D	rs4908204	1	102431521	T	G	-0.0314
mvCKM	YES	rs61814746	1	104337413	AMY1C	69	C	A	0.196819	0.0258423	0.00390736	3.74725e-11	HF	rs9546426	13	84090575	T	G	0.0045	0.008	0.5781		CHD	rs61814746	1	104337413	A	C	-0.015523	0.0118274	0.189365		STROKE	rs61814746	1	104337413	C	A	-0.0016	0.0104	0.8755		T2D	rs61814746	1	104337413	C	A	-0.0045
mvCKM	YES	rs1404028	1	106077515	RP11-251P6.1	70	T	C	0.189861	0.0495448	0.00395132	4.57919e-36	HF	rs915083	10	44755406	T	G	-0.0024	0.0116	0.8349		CHD	rs1404028	1	106077515	C	T	-0.005788	0.0115232	0.615464		STROKE	rs1404028	1	106077515	T	C	0.0082	0.0094	0.3869		T2D	rs1404028	1	106077515	T	C	-0.0357
mvCKM	YES	rs9700212	1	106184853	RP11-251P6.1	70	A	G	0.280318	0.00120178	0.000158364	3.23074e-14	HF	rs6538742	12	97203085	A	T	0.0058	0.0088	0.51		CHD	rs9700212	1	106184853	G	A	-0.002064	0.0118459	0.861678		STROKE	rs9700212	1	106184853	A	G	0.0116	0.0098	0.2401		T2D	rs9700212	1	106184853	A	G	0.0029
mvCKM	YES	rs6604120	1	109289487	STXBP3	71	T	C	0.257455	-0.065174	0.00436472	2.04036e-50	HF	rs16950191	17	49710443	A	C	0.0092	0.0095	0.3305		CHD	rs6604120	1	109289487	C	T	-0.011769	0.0105651	0.265302		STROKE	rs6604120	1	109289487	T	C	0.0032	0.0093	0.727301		T2D	rs6604120	1	109289487	T	C	-0.0123
mvCKM	No_CHD	rs12740374	1	109817590	CELSR2	72	T	G	0.212724	0.0263813	0.0030876	1.2932e-17	HF	rs2385796	19	36959310	T	C	-0.0056	0.0078	0.4709		CHD	rs12740374	1	109817590	G	T	-0.113549	0.011482	4.6302e-23		STROKE	rs12740374	1	109817590	T	G	-0.0237	0.0101	0.01874		T2D	rs12740374	1	109817590	T	G	0.0276
mvCKM	YES	rs7525906	1	110319838	GSTM5	73	T	C	0.2167	-0.0880018	0.0041949	1.03539e-97	HF	rs671026	7	17095430	A	C	-0.0008	0.0136	0.9507		CHD	rs7525906	1	110319838	C	T	0.005412	0.0109747	0.621916		STROKE	rs7525906	1	110319838	T	C	-0.0051	0.0091	0.578		T2D	rs7525906	1	110319838	T	C	0.0624
mvCKM	YES	rs7534238	1	110988988	PROK1	74	G	A	0.491054	0.0277346	0.00310972	4.7187e-19	HF	rs2177168	7	3532425	C	G	0.0166	0.0092	0.072		CHD	rs7534238	1	110988988	A	G	-0.001352	0.0092442	0.883721		STROKE	rs7534238	1	110988988	G	A	-0.0016	0.0078	0.8384		T2D	rs7534238	1	110988988	G	A	-0.0176
mvCKM	YES	rs4839078	1	111405037	OR11I1P	75	C	A	0.286282	0.0434319	0.00291535	3.41429e-50	HF	rs873249	8	81120591	A	C	-0.0095	0.0083	0.2534		CHD	rs4839078	1	111405037	A	C	-0.002903	0.0105032	0.782247		STROKE	rs4839078	1	111405037	C	A	-0.0008	0.0094	0.9343		T2D	rs4839078	1	111405037	C	A	-0.0104
mvCKM	YES	rs2182114	1	111784227	CHI3L2	76	T	C	0.333002	0.0247565	0.00386965	1.5783e-10	HF	rs9299375	9	106529709	A	G	0.0062	0.0078	0.4228		CHD	rs2182114	1	111784227	C	T	0.006788	0.0100796	0.500667		STROKE	rs2182114	1	111784227	T	C	-0.01	0.0088	0.2552		T2D	rs2182114	1	111784227	T	C	0.0057
mvCKM	YES	rs11588345	1	113583087	RP11-389O22.1:RP11-31F15.2	77	C	G	0.333002	-0.0717376	0.0039651	3.66782e-73	HF	rs7897481	10	110901642	T	C	0.0045	0.0099	0.6486		CHD	rs11588345	1	113583087	G	C	-0.02471	0.0096744	0.0106444		STROKE	rs11588345	1	113583087	C	G	-0.0159	0.0083	0.0572295		T2D	rs11588345	1	113583087	C	G	-0.0048
mvCKM	YES	rs12143914	1	119203300	PSMC1P12	78	T	C	0.145129	0.0440983	0.00483549	7.53283e-20	HF	rs1002887	13	79782087	C	G	0.0184	0.0099	0.06257		CHD	rs12143914	1	119203300	C	T	-0.013852	0.0144899	0.339083		STROKE	rs12143914	1	119203300	T	C	-0.0059	0.013	0.6495		T2D	rs12143914	1	119203300	T	C	0.0099
mvCKM	YES	rs34291690	1	120099137	GAPDHP27	79	A	G	0.188867	0.0519053	0.0045766	8.17778e-30	HF	rs12518779	5	44185433	C	G	0.0053	0.0126	0.6709		CHD	rs34291690	1	120099137	G	A	0.013445	0.0153274	0.380385		STROKE	rs34291690	1	120099137	A	G	-0.0082	0.0128	0.5231		T2D	rs34291690	1	120099137	A	G	-0.0192
mvCKM	YES	rs347904	1	120177620	ZNF697	79	T	C	0.326044	0.0571278	0.00434759	1.93938e-39	HF	rs13182474	5	80861777	C	G	0.0033	0.0086	0.6999		CHD	rs347904	1	120177620	C	T	0.007831	0.0102262	0.443809		STROKE	rs347904	1	120177620	T	C	0.0038	0.0091	0.6785		T2D	rs347904	1	120177620	T	C	-0.0093
mvCKM	YES	rs55963049	1	146579535	NBPF13P	80	A	C	0.241551	0.0683871	0.00332765	7.51612e-94	HF	rs2917733	7	2627310	A	T	-0.0107	0.0092	0.2416		CHD	rs55963049	1	146579535	C	A	-0.006596	0.0106575	0.535977		STROKE	rs55963049	1	146579535	A	C	-0.0066	0.01	0.5106		T2D	rs55963049	1	146579535	A	C	-0.0166
mvCKM	YES	rs4845752	1	152226576	FLG-AS1	81	A	C	0.167992	0.00246564	0.000313655	3.81044e-15	HF	rs1927098	9	72835205	C	G	-0.0023	0.0096	0.8123		CHD	rs4845752	1	152226576	C	A	0.004112	0.011205	0.713633		STROKE	rs4845752	1	152226576	A	C	-0.0189	0.0096	0.0477002		T2D	rs4845752	1	152226576	A	C	-0.0113
mvCKM	YES	rs41310873	1	152659805	LCE2B	81	A	G	0.303181	-0.119336	0.0045945	9.80254e-149	HF	rs11015570	10	27434968	T	G	0.0014	0.0081	0.8645		CHD	rs41310873	1	152659805	G	A	-0.013999	0.0110149	0.203757		STROKE	rs41310873	1	152659805	A	G	0.0108	0.0094	0.2502		T2D	rs41310873	1	152659805	A	G	0.0107
mvCKM	YES	rs1171558	1	156452093	MEF2D	82	A	G	0.219682	-0.118869	0.0049913	2.31776e-125	HF	rs10831255	11	94361703	T	C	0.0018	0.0087	0.8375		CHD	rs1171558	1	156452093	G	A	0.017571	0.0109127	0.107368		STROKE	rs1171558	1	156452093	A	G	0.0152	0.0095	0.1102		T2D	rs1171558	1	156452093	A	G	-0.0594
mvCKM	YES	rs9426952	1	157302349	RP11-85G21.2	83	G	A	0.234592	0.0255047	0.00409539	4.73472e-10	HF	rs3098265	13	55866991	T	C	-0.01	0.0098	0.31		CHD	rs9426952	1	157302349	A	G	0.00086	0.0108291	0.936702		STROKE	rs9426952	1	157302349	G	A	0.0106	0.0092	0.2489		T2D	rs9426952	1	157302349	G	A	-0.0021
mvCKM	YES	rs2251964	1	158582552	SPTA1	84	A	G	0.276342	0.0317296	0.00419993	4.19554e-14	HF	rs12458380	18	57649538	T	C	-0.0122	0.0097	0.2073		CHD	rs2251964	1	158582552	G	A	-0.013243	0.0104022	0.202984		STROKE	rs2251964	1	158582552	A	G	0.0151	0.0093	0.1042		T2D	rs2251964	1	158582552	A	G	0.0025
mvCKM	YES	rs2518534	1	158848332	RP11-393K10.1	84	G	A	0.260437	0.0126438	0.00200643	2.94552e-10	HF	rs886510	5	9155810	A	T	-0.0049	0.011	0.6526		CHD	rs2518534	1	158848332	A	G	-0.025422	0.0107216	0.017735		STROKE	rs2518534	1	158848332	G	A	-0.0209	0.0098	0.03312		T2D	rs2518534	1	158848332	G	A	-0.0058
mvCKM	YES	rs6697596	1	160496993	SLAMF6	85	A	T	0.311133	0.0268037	0.00433058	6.03902e-10	HF	rs4878038	9	89671275	A	G	-0.0097	0.0087	0.2649		CHD	rs6697596	1	160496993	T	A	0.005658	0.0107411	0.598359		STROKE	rs6697596	1	160496993	A	T	-0.0075	0.0092	0.4164		T2D	rs6697596	1	160496993	A	T	-0.0093
mvCKM	YES	rs12565565	1	163482240	RNA5SP63	86	G	A	0.161034	-0.0567826	0.00316506	5.70074e-72	HF	rs12051571	17	506808	A	G	-0.0022	0.0125	0.8591		CHD	rs12565565	1	163482240	A	G	-0.00506	0.0117503	0.666739		STROKE	rs12565565	1	163482240	G	A	0.0168	0.0098	0.0853198		T2D	rs12565565	1	163482240	G	A	-0.0102
mvCKM	YES	rs67896405	1	165464103	RP11-280O1.2	87	G	A	0.084493	0.0738636	0.00942551	4.63061e-15	HF	rs2964231	5	151929983	T	C	-0.012	0.0087	0.1692		CHD	rs67896405	1	165464103	A	G	-0.003655	0.0214279	0.86456		STROKE	rs67896405	1	165464103	G	A	0.0072	0.017	0.671399		T2D	rs67896405	1	165464103	G	A	0.0485
mvCKM	YES	rs6667673	1	166777148	CNN2P10	88	G	A	0.335984	-0.0500643	0.00342631	2.36547e-48	HF	rs1852181	7	13657994	A	G	-0.0061	0.0096	0.5221		CHD	rs6667673	1	166777148	A	G	-0.002406	0.0099014	0.808009		STROKE	rs6667673	1	166777148	G	A	-0.0042	0.0086	0.623799		T2D	rs6667673	1	166777148	G	A	0.0286
mvCKM	YES	rs1322494	1	168837734	SUMO1P2	89	T	C	0.151093	0.0295178	0.00329546	3.33274e-19	HF	rs6953679	7	147438666	A	G	-0.007	0.0092	0.4482		CHD	rs1322494	1	168837734	C	T	-0.008637	0.0127583	0.498425		STROKE	rs1322494	1	168837734	T	C	0.0011	0.0107	0.9167		T2D	rs1322494	1	168837734	T	C	0.0105
mvCKM	YES	rs4987306	1	169674445	C1orf112:SELL	90	A	C	0.124254	-0.0499248	0.00532511	6.89444e-21	HF	rs7008236	8	111753477	A	T	0.0069	0.01	0.4854		CHD	rs4987306	1	169674445	C	A	0.01701	0.014	0.224364		STROKE	rs4987306	1	169674445	A	C	-0.0072	0.0125	0.565501		T2D	rs4987306	1	169674445	A	C	-0.0114
mvCKM	YES	rs10919489	1	170807335	MROH9	91	A	G	0.121272	0.0497943	0.00458323	1.70228e-27	HF	rs770210	9	15887931	C	G	-0.0249	0.0117	0.03301		CHD	rs10919489	1	170807335	G	A	-0.017056	0.011911	0.152158		STROKE	rs10919489	1	170807335	A	G	0.0028	0.0104	0.788099		T2D	rs10919489	1	170807335	A	G	-0.0132
mvCKM	YES	rs2294740	1	170928671	MROH9	91	C	T	0.131213	0.0911362	0.0048832	9.85899e-78	HF	rs2480316	10	19093405	T	G	-0.0086	0.0102	0.3982		CHD	rs2294740	1	170928671	T	C	0.013728	0.0120284	0.253744		STROKE	rs2294740	1	170928671	C	T	0.007	0.0107	0.5105		T2D	rs2294740	1	170928671	C	T	-0.0032
mvCKM	YES	rs6695502	1	171773176	METTL13	92	G	T	0.23161	0.0486289	0.00223624	7.56839e-105	HF	rs4275630	11	23379699	T	C	0.0029	0.0078	0.7141		CHD	rs6695502	1	171773176	T	G	-0.004881	0.0104446	0.640268		STROKE	rs6695502	1	171773176	G	T	0.0203	0.0087	0.0201702		T2D	rs6695502	1	171773176	G	T	-0.0049
mvCKM	YES	rs2285210	1	174951278	RABGAP1L	93	T	C	0.302187	0.0335328	0.00406842	1.69045e-16	HF	rs286982	12	42002600	C	G	-0.0037	0.0106	0.7298		CHD	rs2285210	1	174951278	C	T	-0.010131	0.0099286	0.307545		STROKE	rs2285210	1	174951278	T	C	0.0004	0.0085	0.9642		T2D	rs2285210	1	174951278	T	C	-0.0107
mvCKM	YES	rs6658036	1	175179317	RP5-1114G22.2	93	C	T	0.281312	-0.00165953	0.000297074	2.32021e-08	HF	rs4761246	12	69992448	A	G	-0.0144	0.0097	0.1391		CHD	rs6658036	1	175179317	T	C	0.008723	0.0102284	0.393758		STROKE	rs6658036	1	175179317	C	T	0.0197	0.0091	0.0309999		T2D	rs6658036	1	175179317	C	T	0.0249
mvCKM	YES	rs10798464	1	176572091	PAPPA2	94	A	C	0.287276	-0.0608936	0.00393099	4.01218e-54	HF	rs9936055	16	83634077	A	G	-0.0198	0.0107	0.06283		CHD	rs10798464	1	176572091	C	A	-0.0009	0.0104141	0.931132		STROKE	rs10798464	1	176572091	A	C	-0.0122	0.009	0.1748		T2D	rs10798464	1	176572091	A	C	0.0055
mvCKM	YES	rs1458848	1	181226694	RP11-380B22.1	95	G	T	0.191849	0.0481485	0.00362398	2.78709e-40	HF	rs6022347	20	51847746	C	G	-0.0143	0.0086	0.09761		CHD	rs1458848	1	181226694	T	G	0.006813	0.0126866	0.591253		STROKE	rs1458848	1	181226694	G	T	0.0031	0.0113	0.781101		T2D	rs1458848	1	181226694	G	T	0.0039
mvCKM	YES	rs12142736	1	182491111	RGSL1	96	C	T	0.210736	-0.000975399	0.000122954	2.13794e-15	HF	rs11909317	21	23172064	T	C	0.0084	0.0122	0.4913		CHD	rs12142736	1	182491111	T	C	0.01114	0.011873	0.34811		STROKE	rs12142736	1	182491111	C	T	-0.0108	0.0106	0.3095		T2D	rs12142736	1	182491111	C	T	-0.0007
mvCKM	YES	rs12129062	1	188117353	RN7SKP156	97	T	C	0.082505	0.101436	0.00405937	8.25797e-138	HF	rs10959798	9	11432615	T	C	-0.0038	0.0092	0.6806		CHD	rs12129062	1	188117353	C	T	-0.0052	0.0161464	0.747414		STROKE	rs12129062	1	188117353	T	C	0.0117	0.0147	0.4243		T2D	rs12129062	1	188117353	T	C	0.0138
mvCKM	YES	rs4354505	1	188620733	RP11-669M2.2	98	A	C	0.0914513	0.17241	0.00762187	2.73051e-113	HF	rs1604180	13	85606554	A	G	0.0041	0.0095	0.6646		CHD	rs4354505	1	188620733	C	A	-0.01273	0.017312	0.46214		STROKE	rs4354505	1	188620733	A	C	-0.0002	0.0143	0.9888		T2D	rs4354505	1	188620733	A	C	0.0482
mvCKM	YES	rs521702	1	189634377	RNA5SP73	99	G	C	0.451292	0.0477771	0.00423443	1.59212e-29	HF	rs9924669	16	63470727	A	C	-0.0096	0.0087	0.2675		CHD	rs521702	1	189634377	C	G	0.011597	0.0093116	0.21297		STROKE	rs521702	1	189634377	G	C	-0.0114	0.0078	0.1438		T2D	rs521702	1	189634377	G	C	-0.017
mvCKM	YES	rs4614260	1	191044104	HNRNPA1P46	100	G	A	0.194831	-0.0933952	0.00378567	2.20757e-134	HF	rs4796734	17	40046569	T	C	0.002	0.0089	0.8188		CHD	rs4614260	1	191044104	A	G	-0.010816	0.010803	0.31673		STROKE	rs4614260	1	191044104	G	A	0.0232	0.0091	0.0109199		T2D	rs4614260	1	191044104	G	A	-0.0033
mvCKM	YES	rs1416493	1	192231987	RP11-142L4.2	101	T	C	0.189861	-0.042376	0.00312489	6.84107e-42	HF	rs7504974	18	12327752	A	G	0.0147	0.0097	0.1291		CHD	rs1416493	1	192231987	C	T	-0.015087	0.0117622	0.199609		STROKE	rs1416493	1	192231987	T	C	-0.0092	0.0108	0.3911		T2D	rs1416493	1	192231987	T	C	-0.022
mvCKM	YES	rs10921305	1	193001474	UCHL5	102	G	A	0.280318	0.067893	0.00352408	1.04739e-82	HF	rs6056626	20	9421037	T	C	-0.0098	0.0104	0.3487		CHD	rs10921305	1	193001474	A	G	0.002304	0.0105847	0.827684		STROKE	rs10921305	1	193001474	G	A	-0.0085	0.0089	0.3394		T2D	rs10921305	1	193001474	G	A	0.0223
mvCKM	YES	rs10801279	1	193996875	RP11-563D10.1	103	A	G	0.209742	-0.0285262	0.00397094	6.78261e-13	HF	rs1019930	5	166880551	T	C	0.0048	0.0111	0.6634		CHD	rs10801279	1	193996875	G	A	-0.001829	0.0113918	0.872445		STROKE	rs10801279	1	193996875	A	G	0.0101	0.0099	0.3041		T2D	rs10801279	1	193996875	A	G	0.0015
mvCKM	YES	rs680941	1	195166715	AL357932.1	104	A	G	0.359841	-0.0760775	0.00458481	7.78014e-62	HF	rs12903187	15	71702266	T	G	-0.0067	0.0103	0.5183		CHD	rs680941	1	195166715	G	A	0.000456	0.009581	0.962039		STROKE	rs680941	1	195166715	A	G	-0.0074	0.0082	0.3722		T2D	rs680941	1	195166715	A	G	-0.0294
mvCKM	YES	rs77965414	1	196144327	KCNT2	105	C	G	0.0685885	0.0655309	0.0095138	5.65872e-12	HF	rs6506540	18	7936938	A	G	0.0085	0.0084	0.3112		CHD	rs77965414	1	196144327	G	C	0.033688	0.0187231	0.0719747		STROKE	rs77965414	1	196144327	C	G	-0.0143	0.0159	0.3684		T2D	rs77965414	1	196144327	C	G	-0.0017
mvCKM	YES	rs12061508	1	196584468	KCNT2	106	A	G	0.242545	-0.0550338	0.00439124	4.9492e-36	HF	rs10071033	5	65982181	A	G	-0.0265	0.011	0.0165		CHD	rs12061508	1	196584468	G	A	-0.015283	0.0108845	0.160287		STROKE	rs12061508	1	196584468	A	G	-0.0216	0.0092	0.0183202		T2D	rs12061508	1	196584468	A	G	-0.0219
mvCKM	YES	rs1539413	1	197733942	DENND1B	107	T	C	0.196819	-0.0169799	0.00250333	1.17761e-11	HF	rs10077518	5	75758141	T	C	-0.0166	0.0099	0.09356		CHD	rs1539413	1	197733942	C	T	0.03072	0.0119588	0.0102047		STROKE	rs1539413	1	197733942	T	C	0.0176	0.0104	0.0905607		T2D	rs1539413	1	197733942	T	C	0.0272
mvCKM	YES	rs12136367	1	199247142	RP11-382E9.1	108	A	G	0.197813	-0.00857326	0.0015671	4.48033e-08	HF	rs10858379	9	138181507	A	G	0.0052	0.0091	0.5694		CHD	rs12136367	1	199247142	G	A	-0.008121	0.0137936	0.556027		STROKE	rs12136367	1	199247142	A	G	0.0022	0.0112	0.8405		T2D	rs12136367	1	199247142	A	G	-0.0212
mvCKM	YES	rs16848007	1	201158340	IGFN1	109	G	C	0.141153	0.0518276	0.00516916	1.16806e-23	HF	rs16966654	16	63894280	T	C	-0.0098	0.0097	0.3151		CHD	rs16848007	1	201158340	C	G	-0.027062	0.0140021	0.0532721		STROKE	rs16848007	1	201158340	G	C	-0.0043	0.0119	0.720299		T2D	rs16848007	1	201158340	G	C	-0.0151
mvCKM	YES	rs652566	1	201628515	NAV1	110	T	C	0.464215	0.0394307	0.00415553	2.33868e-21	HF	rs2169247	18	77451403	A	G	0.0045	0.0104	0.6695		CHD	rs652566	1	201628515	C	T	-0.018422	0.0097341	0.0584225		STROKE	rs652566	1	201628515	T	C	0.0183	0.0082	0.0259801		T2D	rs652566	1	201628515	T	C	-0.0092
mvCKM	YES	rs61822682	1	202924395	ADIPOR1	111	C	G	0.127237	0.0335482	0.00497585	1.56004e-11	HF	rs6983967	8	59858916	T	C	-0.0077	0.0082	0.3476		CHD	rs61822682	1	202924395	G	C	-0.009542	0.0156935	0.543172		STROKE	rs61822682	1	202924395	C	G	0.0024	0.0135	0.8579		T2D	rs61822682	1	202924395	C	G	-0.0311
mvCKM	YES	rs7554814	1	203643164	ATP2B4	112	A	G	0.156064	-0.0591682	0.00351006	9.35979e-64	HF	rs11157269	14	42681176	A	G	-0.0131	0.0098	0.1777		CHD	rs7554814	1	203643164	G	A	0.041345	0.0130245	0.00150141		STROKE	rs7554814	1	203643164	A	G	-0.0093	0.0109	0.3937		T2D	rs7554814	1	203643164	A	G	-0.0171
mvCKM	YES	rs1534097	1	204069958	SOX13	113	C	T	0.144135	0.0264676	0.00330318	1.12175e-15	HF	rs2191808	7	78784184	A	C	0.0166	0.0122	0.1719		CHD	rs1534097	1	204069958	T	C	0.011927	0.0126084	0.344172		STROKE	rs1534097	1	204069958	C	T	-0.0041	0.0113	0.716901		T2D	rs1534097	1	204069958	C	T	-0.0071
mvCKM	YES	rs17014035	1	206841857	DYRK3	114	C	A	0.168986	-0.0663706	0.00377193	2.64664e-69	HF	rs2906850	12	68344212	T	C	-0.0153	0.0078	0.04988		CHD	rs17014035	1	206841857	A	C	-0.010814	0.0120262	0.368544		STROKE	rs17014035	1	206841857	C	A	-0.005	0.0103	0.6311		T2D	rs17014035	1	206841857	C	A	-0.0034
mvCKM	YES	rs6540674	1	207023321	IL19	114	G	A	0.245527	0.0210501	0.00261537	8.37336e-16	HF	rs688871	13	51328057	A	G	-0.0016	0.0079	0.8429		CHD	rs6540674	1	207023321	A	G	-0.022654	0.0104522	0.0302044		STROKE	rs6540674	1	207023321	G	A	-0.0315	0.0092	0.000607603		T2D	rs6540674	1	207023321	G	A	-0.0015
mvCKM	YES	rs11119284	1	209641089	MIR205HG	115	C	G	0.182903	-1.46445	0.0761206	1.76083e-82	HF	rs409363	5	62577126	C	G	0.0073	0.0081	0.3644		CHD	rs11119284	1	209641089	G	C	0.024517	0.011004	0.0258797		STROKE	rs11119284	1	209641089	C	G	0.0126	0.0105	0.2281		T2D	rs11119284	1	209641089	C	G	-0.015
mvCKM	YES	rs12030655	1	209922123	ADORA2BP	115	T	G	0.229622	0.0276173	0.00451716	9.72522e-10	HF	rs1990010	7	30844750	A	C	-0.0025	0.0078	0.7486		CHD	rs12030655	1	209922123	G	T	-0.01375	0.0108704	0.205906		STROKE	rs12030655	1	209922123	T	G	0.0043	0.0095	0.649999		T2D	rs12030655	1	209922123	T	G	-0.0072
mvCKM	YES	rs72745499	1	210609292	HHAT	116	T	C	0.203777	0.0166534	0.00263358	2.55722e-10	HF	rs2587848	8	137553766	A	C	-0.0063	0.0092	0.4922		CHD	rs72745499	1	210609292	C	T	-0.01588	0.0113006	0.15995		STROKE	rs72745499	1	210609292	T	C	-0.0094	0.0098	0.3388		T2D	rs72745499	1	210609292	T	C	-0.0587
mvCKM	YES	rs55646513	1	211008308	KCNH1	117	G	A	0.243539	0.0259073	0.00307582	3.67296e-17	HF	rs11622938	14	22651353	A	T	0.0099	0.0094	0.2924		CHD	rs55646513	1	211008308	A	G	0.00013	0.0110116	0.990581		STROKE	rs55646513	1	211008308	G	A	-0.0195	0.0096	0.0417898		T2D	rs55646513	1	211008308	G	A	-0.0144
mvCKM	YES	rs35771425	1	211609768	RP11-318L16.6	118	C	T	0.205765	0.0427034	0.00471311	1.2977e-19	HF	rs9612459	22	24161912	A	T	-0.0253	0.012	0.03472		CHD	rs35771425	1	211609768	T	C	-0.016331	0.0115526	0.157472		STROKE	rs35771425	1	211609768	C	T	-0.0154	0.0104	0.1394		T2D	rs35771425	1	211609768	C	T	0.0271
mvCKM	YES	rs2184856	1	211649825	RD3	118	C	A	0.163022	-0.0435704	0.00484083	2.24481e-19	HF	rs6112285	20	19259163	T	C	-0.0035	0.0132	0.7896		CHD	rs2184856	1	211649825	A	C	-0.002045	0.0129235	0.874268		STROKE	rs2184856	1	211649825	C	A	0.0017	0.0105	0.8753		T2D	rs2184856	1	211649825	C	A	0.0221
mvCKM	YES	rs11119753	1	211676720	RD3:RP11-359E8.3	118	T	C	0.17495	-0.0740655	0.0045392	7.4879e-60	HF	rs36710	5	127559444	A	G	0.0141	0.0091	0.1214		CHD	rs11119753	1	211676720	C	T	0.012531	0.0120762	0.299426		STROKE	rs11119753	1	211676720	T	C	0.0135	0.0099	0.1747		T2D	rs11119753	1	211676720	T	C	0.0457
mvCKM	YES	rs4951568	1	212292090	DTL	119	T	C	0.224652	0.0403256	0.00370873	1.54744e-27	HF	rs12800727	11	95758622	T	C	0.0125	0.0084	0.1353		CHD	rs4951568	1	212292090	C	T	0.000201	0.0113147	0.985827		STROKE	rs4951568	1	212292090	T	C	-0.0047	0.0093	0.6088		T2D	rs4951568	1	212292090	T	C	0.0173
mvCKM	YES	rs17721302	1	212435062	RP11-15I11.3	119	G	T	0.197813	-0.00225669	0.000163819	3.57757e-43	HF	rs11643263	16	61856300	A	G	0.0023	0.0102	0.8243		CHD	rs17721302	1	212435062	T	G	-0.001833	0.0112017	0.870018		STROKE	rs17721302	1	212435062	G	T	0.0087	0.0101	0.3878		T2D	rs17721302	1	212435062	G	T	0.063
mvCKM	YES	rs7553890	1	214005905	PROX1-AS1	120	C	T	0.151093	0.101413	0.00606195	7.99923e-63	HF	rs12359257	10	99136359	A	T	-0.0045	0.0083	0.5876		CHD	rs7553890	1	214005905	T	C	0.008158	0.0112875	0.469837		STROKE	rs7553890	1	214005905	C	T	0.0012	0.0097	0.8974		T2D	rs7553890	1	214005905	C	T	-0.0676
mvCKM	YES	rs11120330	1	214638645	PTPN14	121	A	G	0.195825	0.00129233	0.000217216	2.68919e-09	HF	rs12313532	12	41867868	A	G	-0.0213	0.0119	0.07433		CHD	rs11120330	1	214638645	G	A	0.023811	0.0113147	0.0353403		STROKE	rs11120330	1	214638645	A	G	0.0107	0.0099	0.2801		T2D	rs11120330	1	214638645	A	G	-0.0023
mvCKM	YES	rs11117777	1	217325016	ESRRG	122	C	T	0.17495	0.088762	0.00595519	3.05941e-50	HF	rs7143435	14	90207495	T	C	-0.0101	0.0096	0.2946		CHD	rs11117777	1	217325016	T	C	-0.012228	0.0119273	0.305265		STROKE	rs11117777	1	217325016	C	T	-0.0008	0.0105	0.9414		T2D	rs11117777	1	217325016	C	T	-0.0137
mvCKM	YES	rs4523580	1	217764772	GPATCH2	123	G	C	0.228628	-0.0964763	0.00458861	3.85919e-98	HF	rs4504348	5	53725690	A	T	0.0205	0.0086	0.01683		CHD	rs4523580	1	217764772	C	G	0.019072	0.0107661	0.0764804		STROKE	rs4523580	1	217764772	G	C	0.0038	0.009	0.6715		T2D	rs4523580	1	217764772	G	C	-0.0176
mvCKM	YES	rs572796	1	218294727	RNU1-141P	124	T	A	0.162028	0.0670314	0.00555835	1.72639e-33	HF	rs451860	8	130832637	T	C	-0.0015	0.008	0.8488		CHD	rs572796	1	218294727	A	T	-0.009531	0.0126573	0.451448		STROKE	rs572796	1	218294727	T	A	-0.0019	0.0105	0.8548		T2D	rs572796	1	218294727	T	A	-0.0114
mvCKM	YES	rs61824476	1	218711782	U3	125	A	C	0.253479	-0.0294844	0.00429154	6.40454e-12	HF	rs6879916	5	23312603	T	C	-0.0274	0.0112	0.01456		CHD	rs61824476	1	218711782	C	A	-0.010783	0.0104837	0.30369		STROKE	rs61824476	1	218711782	A	C	0.0135	0.0091	0.1374		T2D	rs61824476	1	218711782	A	C	-0.0209
mvCKM	YES	rs113535874	1	220008363	SLC30A10	126	T	C	0.127237	0.0502727	0.00325942	1.13221e-53	HF	rs11225990	11	103608381	T	C	0.0081	0.012	0.499		CHD	rs113535874	1	220008363	C	T	-0.007806	0.0135893	0.565683		STROKE	rs113535874	1	220008363	T	C	-0.0016	0.0122	0.894		T2D	rs113535874	1	220008363	T	C	-0.0378
mvCKM	YES	rs2647455	1	220207810	EPRS	126	T	C	0.206759	0.0805076	0.0046948	6.47597e-66	HF	rs7028602	9	117216819	T	G	0.0065	0.0088	0.4624		CHD	rs2647455	1	220207810	C	T	0.0197	0.0121489	0.104902		STROKE	rs2647455	1	220207810	T	C	0.0062	0.0109	0.5684		T2D	rs2647455	1	220207810	T	C	0.0059
mvCKM	YES	rs34064794	1	221458189	RP11-421L10.1	127	G	A	0.255467	-0.0443115	0.00316552	1.59886e-44	HF	rs224064	10	64504212	T	C	-0.0032	0.0079	0.6846		CHD	rs34064794	1	221458189	A	G	0.002969	0.0106814	0.781043		STROKE	rs34064794	1	221458189	G	A	0.0163	0.009	0.06952		T2D	rs34064794	1	221458189	G	A	-0.0033
mvCKM	YES	rs17461309	1	222551394	RP11-400N13.1	128	A	C	0.454274	-0.0416396	0.00339092	1.1638e-34	HF	rs976575	9	109649778	A	G	-0.0134	0.0081	0.09786		CHD	rs17461309	1	222551394	C	A	0.011155	0.0100578	0.267394		STROKE	rs17461309	1	222551394	A	C	0.0107	0.0084	0.2012		T2D	rs17461309	1	222551394	A	C	0.0038
mvCKM	YES	rs35806535	1	222930485	FAM177B	128	C	T	0.173956	-0.0175272	0.00300848	5.68004e-09	HF	rs7504651	18	65045137	A	G	-0.0083	0.0105	0.4312		CHD	rs35806535	1	222930485	T	C	0.058554	0.0118719	8.12999e-07		STROKE	rs35806535	1	222930485	C	T	0.0043	0.0099	0.6614		T2D	rs35806535	1	222930485	C	T	0.0061
mvCKM	YES	rs61839890	1	223610139	C1orf65	129	T	A	0.272366	0.0184015	0.00257588	9.08052e-13	HF	rs2224109	10	83734145	A	G	0.0024	0.0089	0.7901		CHD	rs61839890	1	223610139	A	T	0.006412	0.0103153	0.534204		STROKE	rs61839890	1	223610139	T	A	-0.0036	0.0084	0.673		T2D	rs61839890	1	223610139	T	A	0.0093
mvCKM	YES	rs7550648	1	224707177	CNIH3	130	T	C	0.171968	-0.0430457	0.00339293	6.99101e-37	HF	rs9544056	13	76443847	T	G	0.0022	0.0112	0.8439		CHD	rs7550648	1	224707177	C	T	-0.029438	0.0118763	0.0131853		STROKE	rs7550648	1	224707177	T	C	-0.0267	0.0104	0.01012		T2D	rs7550648	1	224707177	T	C	-0.0061
mvCKM	YES	rs17518706	1	226632413	RN7SKP165	131	G	C	0.255467	0.0573298	0.00432628	4.42148e-40	HF	rs11975090	7	90046923	A	G	0.0013	0.0089	0.887		CHD	rs17518706	1	226632413	C	G	-0.012558	0.0114331	0.272033		STROKE	rs17518706	1	226632413	G	C	-0.0095	0.0102	0.352		T2D	rs17518706	1	226632413	G	C	-0.0168
mvCKM	YES	rs12745292	1	229093925	ISCA1P2	132	G	A	0.256461	-0.0210829	0.00376694	2.18314e-08	HF	rs603874	11	87829030	T	C	0.0053	0.0114	0.6442		CHD	rs12745292	1	229093925	A	G	0.00298	0.011269	0.79144		STROKE	rs12745292	1	229093925	G	A	-0.0005	0.01	0.9617		T2D	rs12745292	1	229093925	G	A	-0.0166
mvCKM	YES	rs17761459	1	230409562	GALNT2	133	C	A	0.148111	-0.03415	0.00544663	3.61226e-10	HF	rs4738828	8	61727587	T	G	0.0021	0.0081	0.794		CHD	rs17761459	1	230409562	A	C	-0.010472	0.0132863	0.43059		STROKE	rs17761459	1	230409562	C	A	0.009	0.0114	0.4316		T2D	rs17761459	1	230409562	C	A	0.0071
mvCKM	YES	rs12699	1	230973407	C1orf198	134	T	G	0.289264	0.061637	0.00387817	7.05098e-57	HF	rs7919439	10	9764384	A	G	0.0129	0.0084	0.1233		CHD	rs12699	1	230973407	G	T	0.013729	0.0115048	0.23274		STROKE	rs12699	1	230973407	T	G	0.0079	0.0096	0.4084		T2D	rs12699	1	230973407	T	G	0.0037
mvCKM	YES	rs17748992	1	231892773	TSNAX-DISC1:DISC1	135	T	C	0.0874751	-0.107817	0.00640302	1.27435e-63	HF	rs17599975	13	31472977	T	C	0.0213	0.0115	0.06276		CHD	rs17748992	1	231892773	C	T	-0.017026	0.017967	0.343321		STROKE	rs17748992	1	231892773	T	C	-0.0317	0.0153	0.0379097		T2D	rs17748992	1	231892773	T	C	0.033
mvCKM	YES	rs7517457	1	231965989	DISC1	135	G	T	0.097416	-0.154121	0.00670853	8.49195e-117	HF	rs11700511	21	38723262	A	T	0.0242	0.0123	0.04913		CHD	rs7517457	1	231965989	T	G	0.005641	0.0136132	0.678599		STROKE	rs7517457	1	231965989	G	T	-0.0014	0.012	0.9067		T2D	rs7517457	1	231965989	G	T	0.0234
mvCKM	YES	rs74774788	1	233401203	PCNXL2	136	G	A	0.125249	-0.0391113	0.00433325	1.78288e-19	HF	rs10745495	12	89554610	C	G	-0.0143	0.0094	0.127		CHD	rs74774788	1	233401203	A	G	-0.001713	0.0141618	0.903723		STROKE	rs74774788	1	233401203	G	A	-0.0149	0.0135	0.2685		T2D	rs74774788	1	233401203	G	A	0.0035
mvCKM	YES	rs12041160	1	234420229	SLC35F3	137	A	T	0.266402	-0.054194	0.00379602	3.06387e-46	HF	rs167596	17	32212218	T	C	0.0033	0.0111	0.7652		CHD	rs12041160	1	234420229	T	A	0.020338	0.0103968	0.0504429		STROKE	rs12041160	1	234420229	A	T	0.0052	0.0089	0.5608		T2D	rs12041160	1	234420229	A	T	-0.014
mvCKM	YES	rs12744713	1	235538458	TBCE	138	G	A	0.105368	-0.00756807	0.000961107	3.42575e-15	HF	rs6451624	5	42519262	T	C	0.0066	0.0078	0.3963		CHD	rs12744713	1	235538458	A	G	-0.016161	0.0152209	0.288344		STROKE	rs12744713	1	235538458	G	A	0.0015	0.0128	0.9059		T2D	rs12744713	1	235538458	G	A	0.0349
mvCKM	YES	rs2451602	1	238168345	MTND5P18	139	C	A	0.446322	-0.0540455	0.00340011	6.83981e-57	HF	rs1524858	7	67729665	C	G	-0.0054	0.0093	0.5606		CHD	rs2451602	1	238168345	A	C	-0.020925	0.0094723	0.02717		STROKE	rs2451602	1	238168345	C	A	0.0022	0.008	0.785199		T2D	rs2451602	1	238168345	C	A	-0.024
mvCKM	YES	rs4659829	1	238296095	YWHAQP9	139	C	T	0.17992	-0.0406548	0.00412892	7.10651e-23	HF	rs12680896	8	109848796	T	C	-0.0146	0.0095	0.1238		CHD	rs4659829	1	238296095	T	C	0.017702	0.0112147	0.11446		STROKE	rs4659829	1	238296095	C	T	-0.0057	0.0095	0.5516		T2D	rs4659829	1	238296095	C	T	0.0203
mvCKM	YES	rs16836691	1	238473459	RNU6-725P	139	G	A	0.296223	-0.0329296	0.00455453	4.82728e-13	HF	rs282941	16	77538625	T	C	-0.0113	0.0093	0.2229		CHD	rs16836691	1	238473459	A	G	0.00252	0.0103566	0.807755		STROKE	rs16836691	1	238473459	G	A	-0.0042	0.0088	0.6372		T2D	rs16836691	1	238473459	G	A	-0.0155
mvCKM	YES	rs2174076	1	238837866	MIPEPP2	140	A	G	0.45825	-0.036922	0.00244142	1.13913e-51	HF	rs13294341	9	29479296	A	G	-0.0078	0.0102	0.4445		CHD	rs2174076	1	238837866	G	A	-0.001927	0.0091541	0.833272		STROKE	rs2174076	1	238837866	A	G	0.006	0.0081	0.4573		T2D	rs2174076	1	238837866	A	G	0.0112
mvCKM	YES	rs10925799	1	239207623	RP11-307O1.1	141	T	C	0.254473	0.0571489	0.00248812	9.58436e-117	HF	rs10996977	10	67970573	T	G	0.0071	0.0112	0.5263		CHD	rs10925799	1	239207623	C	T	0.001284	0.0101632	0.899464		STROKE	rs10925799	1	239207623	T	C	0.0154	0.0089	0.0817391		T2D	rs10925799	1	239207623	T	C	-0.0032
mvCKM	YES	rs34584779	1	239619387	CHRM3	142	T	C	0.267396	-0.0153055	0.00270876	1.60108e-08	HF	rs4768983	13	29159684	A	C	0.0143	0.0089	0.1082		CHD	rs34584779	1	239619387	C	T	-0.007974	0.0103707	0.441954		STROKE	rs34584779	1	239619387	T	C	-0.0096	0.0091	0.2885		T2D	rs34584779	1	239619387	T	C	0.0324
mvCKM	YES	rs12143036	1	240205133	FMN2	143	T	C	0.253479	-0.0272471	0.0028646	1.87672e-21	HF	rs4795759	17	31591397	T	C	0.0058	0.0093	0.5304		CHD	rs12143036	1	240205133	C	T	-0.013929	0.0108889	0.200827		STROKE	rs12143036	1	240205133	T	C	0.0138	0.0094	0.1444		T2D	rs12143036	1	240205133	T	C	0.0099
mvCKM	YES	rs12064514	1	240890859	RP11-80B9.4	144	T	G	0.159046	-0.056722	0.00506717	4.36185e-29	HF	rs7795109	7	29666244	A	G	-0.0077	0.0099	0.4371		CHD	rs12064514	1	240890859	G	T	-0.005163	0.0127746	0.686095		STROKE	rs12064514	1	240890859	T	G	-0.0033	0.0112	0.7696		T2D	rs12064514	1	240890859	T	G	0.0026
mvCKM	YES	rs9661172	1	241007710	RGS7	144	G	A	0.282306	0.0496196	0.00372042	1.40872e-40	HF	rs1569813	20	15617180	T	C	-0.0102	0.0104	0.3294		CHD	rs9661172	1	241007710	A	G	-0.014912	0.0102121	0.144227		STROKE	rs9661172	1	241007710	G	A	0.0016	0.0089	0.8549		T2D	rs9661172	1	241007710	G	A	0.0103
mvCKM	YES	rs76507089	1	241865601	WDR64	145	T	A	0.0795229	0.00105281	0.00017192	9.1334e-10	HF	rs765356	20	42529720	T	C	0.004	0.009	0.6535		CHD	rs76507089	1	241865601	A	T	-0.011224	0.0236439	0.634995		STROKE	rs76507089	1	241865601	T	A	0.0023	0.017	0.8929		T2D	rs76507089	1	241865601	T	A	0.0549
mvCKM	YES	rs6658006	1	242080555	RP11-323D18.5	145	G	A	0.243539	0.0888965	0.00494929	3.90215e-72	HF	rs9522106	13	111713028	A	G	0.0138	0.0105	0.1908		CHD	rs6658006	1	242080555	A	G	0.009714	0.011142	0.383296		STROKE	rs6658006	1	242080555	G	A	-0.0133	0.0096	0.1662		T2D	rs6658006	1	242080555	G	A	0.0146
mvCKM	YES	rs2809887	1	242989393	RSL24D1P4	146	A	G	0.183897	-0.0160686	0.00251822	1.7603e-10	HF	rs2092954	20	51016925	T	C	0.013	0.0081	0.109		CHD	rs2809887	1	242989393	G	A	0.02037	0.0105315	0.0530884		STROKE	rs2809887	1	242989393	A	G	0.0183	0.0092	0.0462296		T2D	rs2809887	1	242989393	A	G	0.0332
mvCKM	YES	rs7523102	1	243672074	AKT3	147	T	C	0.259443	-0.0318757	0.00308965	5.90822e-25	HF	rs2180454	14	29690513	T	C	-0.0024	0.0092	0.7963		CHD	rs7523102	1	243672074	C	T	-5.5e-05	0.0105912	0.995857		STROKE	rs7523102	1	243672074	T	C	0.0087	0.009	0.329		T2D	rs7523102	1	243672074	T	C	0.0163
mvCKM	YES	rs426182	1	243775450	AKT3	147	T	A	0.141153	-0.0545162	0.00339458	4.88372e-58	HF	rs4076128	13	31305143	A	G	-0.0057	0.0089	0.5175		CHD	rs426182	1	243775450	A	T	0.007295	0.0121717	0.548946		STROKE	rs426182	1	243775450	T	A	0.0056	0.0108	0.6038		T2D	rs426182	1	243775450	T	A	0.0623
mvCKM	YES	rs685637	1	245163416	EFCAB2	148	A	C	0.413519	-0.0296129	0.00215238	4.54434e-43	HF	rs7231518	18	9456965	T	C	-0.0149	0.0087	0.08564		CHD	rs685637	1	245163416	C	A	-0.009335	0.00967	0.334368		STROKE	rs685637	1	245163416	A	C	0.0025	0.0084	0.768999		T2D	rs685637	1	245163416	A	C	-0.0322
mvCKM	YES	rs4658447	1	245359604	KIF26B	148	C	T	0.474155	0.00305423	0.000464611	4.90682e-11	HF	rs5028055	7	147030443	T	G	0.0027	0.009	0.7619		CHD	rs4658447	1	245359604	T	C	-0.002357	0.0097689	0.809341		STROKE	rs4658447	1	245359604	C	T	-0.013	0.0083	0.117		T2D	rs4658447	1	245359604	C	T	-0.0233
mvCKM	YES	rs6658269	1	246426411	SMYD3	149	G	A	0.144135	-0.0300018	0.00318897	5.05745e-21	HF	rs12187397	5	125593382	A	G	-0.001	0.0089	0.9102		CHD	rs6658269	1	246426411	A	G	-0.004891	0.0112701	0.664304		STROKE	rs6658269	1	246426411	G	A	0.0217	0.0096	0.0237099		T2D	rs6658269	1	246426411	G	A	-0.0337
mvCKM	YES	rs61373194	1	247171390	ZNF670:ZNF695	150	G	C	0.0964215	0.0499782	0.00673964	1.21117e-13	HF	rs374379	5	142996141	T	C	0.0173	0.0129	0.1805		CHD	rs61373194	1	247171390	C	G	0.007279	0.0150471	0.628566		STROKE	rs61373194	1	247171390	G	C	0.0088	0.0143	0.5371		T2D	rs61373194	1	247171390	G	C	-0.0004
mvCKM	YES	rs28667587	1	248566400	OR2T1	151	C	T	0.16501	-0.0784416	0.00496593	3.31829e-56	HF	rs2023993	7	68162576	A	G	0.0035	0.0083	0.6736		CHD	rs28667587	1	248566400	T	C	-0.000906	0.0129245	0.944115		STROKE	rs28667587	1	248566400	C	T	-0.0096	0.0114	0.3989		T2D	rs28667587	1	248566400	C	T	0.0416
mvCKM	YES	rs4327261	2	1050007	SNTG2	152	G	C	0.134195	-0.0998059	0.00638499	4.45332e-55	HF	rs17156851	7	82552605	T	C	0.0005	0.0095	0.9589		CHD	rs4327261	2	1050007	C	G	-0.001535	0.0132233	0.907586		STROKE	rs4327261	2	1050007	G	C	-0.0017	0.0106	0.8721		T2D	rs4327261	2	1050007	G	C	-0.0171
mvCKM	YES	rs12470060	2	2198307	MYT1L	153	T	C	0.139165	0.238854	0.00580146	1e-200	HF	rs885150	9	124420173	T	C	-0.0212	0.0088	0.01545		CHD	rs12470060	2	2198307	C	T	-0.017359	0.0136697	0.204125		STROKE	rs12470060	2	2198307	T	C	0.0158	0.011	0.1492		T2D	rs12470060	2	2198307	T	C	0.0061
mvCKM	YES	rs934566	2	2874131	AC011995.3	154	G	C	0.393638	0.0256521	0.00311389	1.75153e-16	HF	rs2023936	7	19039067	C	G	-0.0261	0.0097	0.006779		CHD	rs934566	2	2874131	C	G	-0.003277	0.0094213	0.727969		STROKE	rs934566	2	2874131	G	C	0.0101	0.0082	0.2194		T2D	rs934566	2	2874131	G	C	-0.0059
mvCKM	YES	rs4546036	2	3303096	TSSC1:TSSC1-IT1	155	C	T	0.263419	-0.0268775	0.00265448	4.26509e-24	HF	rs1383795	14	85141162	T	C	-0.0196	0.0109	0.07272		CHD	rs4546036	2	3303096	T	C	0.009548	0.0109236	0.382081		STROKE	rs4546036	2	3303096	C	T	0.0096	0.009	0.2819		T2D	rs4546036	2	3303096	C	T	0.0184
mvCKM	YES	rs35114997	2	4110598	RN7SL531P	156	T	C	0.312127	-0.0707662	0.00320258	3.4082e-108	HF	rs2812511	10	71423968	C	G	-0.0166	0.0081	0.03972		CHD	rs35114997	2	4110598	C	T	-0.00189	0.010803	0.861118		STROKE	rs35114997	2	4110598	T	C	-0.013	0.0095	0.1724		T2D	rs35114997	2	4110598	T	C	-0.0161
mvCKM	YES	rs62118168	2	4497693	NPM1P48	157	T	G	0.167992	0.11208	0.00557385	6.2485e-90	HF	rs2546327	5	152616309	A	G	-0.0109	0.0109	0.3194		CHD	rs62118168	2	4497693	G	T	-0.004815	0.0149863	0.747989		STROKE	rs62118168	2	4497693	T	G	0.011	0.012	0.3599		T2D	rs62118168	2	4497693	T	G	0.0113
mvCKM	YES	rs12477389	2	4849033	SNORA31	158	G	C	0.168986	-0.0288039	0.00267497	4.87932e-27	HF	rs1515887	16	27062009	A	C	0.0065	0.0092	0.4776		CHD	rs12477389	2	4849033	C	G	-0.014854	0.0113114	0.18912		STROKE	rs12477389	2	4849033	G	C	0.0029	0.0096	0.764499		T2D	rs12477389	2	4849033	G	C	-0.0235
mvCKM	YES	rs7601636	2	6908137	LINC00487	159	A	G	0.150099	0.0409006	0.0057297	9.44598e-13	HF	rs5767410	22	47309007	A	G	0.0081	0.0089	0.3594		CHD	rs7601636	2	6908137	G	A	-0.002926	0.0137284	0.831222		STROKE	rs7601636	2	6908137	A	G	-0.0274	0.0118	0.0205698		T2D	rs7601636	2	6908137	A	G	-0.0008
mvCKM	YES	rs10193011	2	7059932	RNF144A	159	T	C	0.363817	0.00196329	0.00027013	3.65039e-13	HF	rs12113049	7	96833467	T	C	0.0037	0.0083	0.6532		CHD	rs10193011	2	7059932	C	T	-0.005992	0.0100024	0.549137		STROKE	rs10193011	2	7059932	T	C	-0.0027	0.0087	0.7604		T2D	rs10193011	2	7059932	T	C	-0.0031
mvCKM	YES	rs16866472	2	7967373	AC007463.2	160	C	T	0.0984095	0.0722016	0.00731322	5.46412e-23	HF	rs1435535	7	12214836	A	G	0.0059	0.0098	0.5506		CHD	rs16866472	2	7967373	T	C	-0.015534	0.0163648	0.342502		STROKE	rs16866472	2	7967373	C	T	-0.0081	0.0138	0.56		T2D	rs16866472	2	7967373	C	T	0.0639
mvCKM	YES	rs62129922	2	10313375	C2orf48	161	T	C	0.338966	0.072098	0.00443728	2.29952e-59	HF	rs1235287	21	37013592	T	C	0.0066	0.0108	0.5406		CHD	rs62129922	2	10313375	C	T	-0.013876	0.0098004	0.156816		STROKE	rs62129922	2	10313375	T	C	0.0004	0.0086	0.9635		T2D	rs62129922	2	10313375	T	C	-0.0066
mvCKM	YES	rs60925909	2	10894859	ATP6V1C2	162	C	T	0.202783	0.161965	0.00511789	1e-200	HF	rs1362553	16	52438954	C	G	0.0025	0.008	0.7561		CHD	rs60925909	2	10894859	T	C	-0.006418	0.0115341	0.577912		STROKE	rs60925909	2	10894859	C	T	-0.0046	0.0098	0.6372		T2D	rs60925909	2	10894859	C	T	0.0131
mvCKM	YES	rs4313952	2	11694251	GREB1	163	G	A	0.129225	0.0362072	0.00424863	1.56706e-17	HF	rs16904256	8	131384143	T	C	-0.0032	0.0095	0.7356		CHD	rs4313952	2	11694251	A	G	-0.008138	0.0127649	0.523779		STROKE	rs4313952	2	11694251	G	A	0.0067	0.0109	0.5371		T2D	rs4313952	2	11694251	G	A	0.0154
mvCKM	YES	rs2705843	2	14875245	FAM84A:AC011897.1	164	C	T	0.333996	-0.000767374	7.62641e-05	8.12879e-24	HF	rs848904	7	78990258	C	G	-0.0047	0.0079	0.5521		CHD	rs2705843	2	14875245	T	C	0.011341	0.0094691	0.231039		STROKE	rs2705843	2	14875245	C	T	-0.0011	0.0081	0.8933		T2D	rs2705843	2	14875245	C	T	0.0032
mvCKM	YES	rs9678924	2	15949434	AC113608.1	165	G	T	0.153082	0.0447295	0.00579999	1.23863e-14	HF	rs17120607	12	58751017	T	G	-0.0071	0.0115	0.538		CHD	rs9678924	2	15949434	T	G	-0.002326	0.0118882	0.84488		STROKE	rs9678924	2	15949434	G	T	-0.0086	0.0099	0.381		T2D	rs9678924	2	15949434	G	T	0.0009
mvCKM	YES	rs10856781	2	16595843	AC010880.1	166	A	C	0.161034	0.0230466	0.00283417	4.23259e-16	HF	rs12888924	14	96287146	A	T	0.005	0.0086	0.5573		CHD	rs10856781	2	16595843	C	A	5.4e-05	0.0121239	0.996446		STROKE	rs10856781	2	16595843	A	C	0.0207	0.0105	0.0490095		T2D	rs10856781	2	16595843	A	C	0.0425
mvCKM	YES	rs35468724	2	17394636	ZFYVE9P2	167	G	A	0.154076	-0.0364546	0.00367213	3.16489e-23	HF	rs2471027	15	62800731	T	G	0.0037	0.0109	0.7356		CHD	rs35468724	2	17394636	A	G	-0.011138	0.0137707	0.418621		STROKE	rs35468724	2	17394636	G	A	-0.0102	0.0123	0.4076		T2D	rs35468724	2	17394636	G	A	0.008
mvCKM	YES	rs13034492	2	18143091	KCNS3	168	T	G	0.333996	0.0292254	0.00337662	4.91945e-18	HF	rs1423971	16	59377850	T	C	0.0037	0.0082	0.6534		CHD	rs13034492	2	18143091	G	T	0.013254	0.0099568	0.18314		STROKE	rs13034492	2	18143091	T	G	-0.0017	0.0083	0.836		T2D	rs13034492	2	18143091	T	G	0.0286
mvCKM	YES	rs16985346	2	18807786	NT5C1B	169	G	A	0.385686	-0.0221834	0.00334286	3.22218e-11	HF	rs10504574	8	75252630	A	C	0.0005	0.0102	0.9611		CHD	rs16985346	2	18807786	A	G	-0.007637	0.0095603	0.424394		STROKE	rs16985346	2	18807786	G	A	0.0152	0.0081	0.0603004		T2D	rs16985346	2	18807786	G	A	0.0348
mvCKM	YES	rs62110772	2	19909572	AC019055.1	170	A	T	0.286282	-0.0148762	0.00261291	1.24586e-08	HF	rs7704256	5	11160431	C	G	0.0072	0.0078	0.3563		CHD	rs62110772	2	19909572	T	A	0.012736	0.010979	0.246036		STROKE	rs62110772	2	19909572	A	T	-0.0029	0.0094	0.7605		T2D	rs62110772	2	19909572	A	T	0.0404
mvCKM	YES	rs1396731	2	22716219	AC068490.2	171	T	A	0.286282	0.0667199	0.00458843	6.67062e-48	HF	rs7094903	10	3580967	T	C	-0.0004	0.0094	0.9701		CHD	rs1396731	2	22716219	A	T	-0.001453	0.0098113	0.882268		STROKE	rs1396731	2	22716219	T	A	0.0028	0.0087	0.749799		T2D	rs1396731	2	22716219	T	A	-0.0119
mvCKM	YES	rs11687600	2	22886365	AC096570.1	171	G	A	0.162028	-0.16818	0.00548294	1e-200	HF	rs2150044	10	11121238	A	T	0.0076	0.0079	0.3343		CHD	rs11687600	2	22886365	A	G	-0.005451	0.0129115	0.672893		STROKE	rs11687600	2	22886365	G	A	-0.0023	0.0108	0.8342		T2D	rs11687600	2	22886365	G	A	0.0259
mvCKM	YES	rs72789910	2	24388609	FAM228B:RP11-507M3.1	172	G	T	0.250497	0.0419751	0.00282871	8.20603e-50	HF	rs353722	8	57692453	A	C	-0.0081	0.0092	0.3758		CHD	rs72789910	2	24388609	T	G	0.040644	0.0111289	0.0002601		STROKE	rs72789910	2	24388609	G	T	0.005	0.0097	0.6084		T2D	rs72789910	2	24388609	G	T	0.0198
mvCKM	YES	rs11684913	2	24826852	NCOA1	172	C	A	0.224652	0.0460483	0.00374415	9.19855e-35	HF	rs11599504	10	53596241	A	C	0.018	0.0079	0.02242		CHD	rs11684913	2	24826852	A	C	-0.013796	0.0112419	0.219749		STROKE	rs11684913	2	24826852	C	A	0.008	0.0098	0.4171		T2D	rs11684913	2	24826852	C	A	0.0228
mvCKM	YES	rs10175830	2	25930271	Y_RNA	173	A	G	0.308151	0.0378041	0.00440166	8.80262e-18	HF	rs1755776	14	36693285	A	G	0.0019	0.0084	0.8187		CHD	rs10175830	2	25930271	G	A	0.003002	0.010526	0.775493		STROKE	rs10175830	2	25930271	A	G	-0.0072	0.0093	0.434		T2D	rs10175830	2	25930271	A	G	0.0187
mvCKM	YES	rs10200754	2	25948655	AC010150.2	173	A	G	0.206759	0.0275353	0.00449382	8.93438e-10	HF	rs11083800	19	46637181	A	C	-0.0023	0.0079	0.7671		CHD	rs10200754	2	25948655	G	A	0.014338	0.0118111	0.22477		STROKE	rs10200754	2	25948655	A	G	-0.0046	0.0105	0.658901		T2D	rs10200754	2	25948655	A	G	0.043
mvCKM	YES	rs4665382	2	27783801	AC109829.1	174	C	T	0.264414	-0.00784257	0.000948615	1.36919e-16	HF	rs612195	13	91794069	T	C	-0.0138	0.0098	0.1603		CHD	rs4665382	2	27783801	T	C	0.008361	0.0104098	0.421867		STROKE	rs4665382	2	27783801	C	T	0.0087	0.0093	0.3464		T2D	rs4665382	2	27783801	C	T	-0.0447
mvCKM	YES	rs6715256	2	28723942	PLB1	175	T	C	0.152087	-0.10873	0.00500808	1.6152e-104	HF	rs645798	11	85313065	T	C	-0.0039	0.0091	0.6684		CHD	rs6715256	2	28723942	C	T	-0.005092	0.0127757	0.690211		STROKE	rs6715256	2	28723942	T	C	0.009	0.0111	0.4154		T2D	rs6715256	2	28723942	T	C	-0.0146
mvCKM	YES	rs895665	2	30854803	LCLAT1	176	A	G	0.159046	-0.0514851	0.00349363	3.73776e-49	HF	rs10820939	9	94851058	C	G	0.0033	0.0096	0.7278		CHD	rs895665	2	30854803	G	A	0.005138	0.0122163	0.674058		STROKE	rs895665	2	30854803	A	G	0.0132	0.0122	0.278		T2D	rs895665	2	30854803	A	G	0.0307
mvCKM	YES	rs62139520	2	31109970	GALNT14	176	A	C	0.178926	0.148597	0.00507016	8.14326e-189	HF	rs2821463	9	9739629	A	T	-0.007	0.0081	0.3845		CHD	rs62139520	2	31109970	C	A	-0.016116	0.0126975	0.204361		STROKE	rs62139520	2	31109970	A	C	0.0132	0.0108	0.2241		T2D	rs62139520	2	31109970	A	C	0.016
mvCKM	YES	rs62139556	2	31188003	GALNT14	176	G	A	0.16501	-0.019108	0.00322612	3.16308e-09	HF	rs11053549	12	10172178	T	C	0.0123	0.0098	0.2073		CHD	rs62139556	2	31188003	A	G	0.016241	0.0114429	0.155807		STROKE	rs62139556	2	31188003	G	A	-0.0151	0.0099	0.1288		T2D	rs62139556	2	31188003	G	A	-0.0262
mvCKM	YES	rs7567147	2	31502986	AL121657.4	177	T	C	0.280318	0.0243791	0.00286483	1.74245e-17	HF	rs12592318	15	84219700	A	G	-0.0039	0.009	0.6676		CHD	rs7567147	2	31502986	C	T	-0.010751	0.010865	0.322413		STROKE	rs7567147	2	31502986	T	C	-0.0116	0.0099	0.2421		T2D	rs7567147	2	31502986	T	C	-0.0198
mvCKM	YES	rs10187719	2	31600146	XDH	177	C	T	0.267396	0.0411678	0.00378907	1.69437e-27	HF	rs1555324	20	5303028	C	G	-0.0017	0.0103	0.8667		CHD	rs10187719	2	31600146	T	C	0.002624	0.010563	0.803813		STROKE	rs10187719	2	31600146	C	T	0.0036	0.0093	0.6999		T2D	rs10187719	2	31600146	C	T	0.0013
mvCKM	YES	rs34666266	2	32926832	TTC27	178	T	C	0.0785288	0.102259	0.00881428	4.04883e-31	HF	rs4817648	21	35732506	C	G	0.0241	0.012	0.04433		CHD	rs34666266	2	32926832	C	T	-0.012874	0.017538	0.462909		STROKE	rs34666266	2	32926832	T	C	-0.0091	0.0154	0.5546		T2D	rs34666266	2	32926832	T	C	0.0463
mvCKM	YES	rs219147	2	33212979	LTBP1	179	T	C	0.327038	-0.0332414	0.00493496	1.62915e-11	HF	rs12827073	12	114459372	A	G	-0.0189	0.0083	0.02344		CHD	rs219147	2	33212979	C	T	0.005531	0.0103316	0.592409		STROKE	rs219147	2	33212979	T	C	0.0045	0.0102	0.6604		T2D	rs219147	2	33212979	T	C	-0.0179
mvCKM	YES	rs1834282	2	34281766	AC009499.1	180	G	A	0.265408	0.028888	0.00372814	9.28741e-15	HF	rs420029	8	109108609	A	G	-0.0054	0.0089	0.5444		CHD	rs1834282	2	34281766	A	G	-0.00143	0.0126323	0.909871		STROKE	rs1834282	2	34281766	G	A	0.0068	0.0114	0.5498		T2D	rs1834282	2	34281766	G	A	0.0108
mvCKM	YES	rs75670636	2	35307874	AC012593.1	181	A	C	0.257455	0.0265663	0.00200179	3.39684e-40	HF	rs13254738	8	128104343	A	C	-0.0018	0.0084	0.8313		CHD	rs75670636	2	35307874	C	A	0.018464	0.0110898	0.0959224		STROKE	rs75670636	2	35307874	A	C	-0.0075	0.01	0.453401		T2D	rs75670636	2	35307874	A	C	-0.0162
mvCKM	YES	rs12618906	2	35360264	AC012593.1	181	C	T	0.227634	-0.0268572	0.00413734	8.50309e-11	HF	rs1147226	5	32852778	T	C	0.0021	0.0081	0.7948		CHD	rs12618906	2	35360264	T	C	-0.032013	0.0110507	0.00376851		STROKE	rs12618906	2	35360264	C	T	0.0175	0.0097	0.0718505		T2D	rs12618906	2	35360264	C	T	-0.0559
mvCKM	YES	rs5023607	2	35425529	AC012593.1	181	C	T	0.486083	0.0314134	0.00355376	9.61626e-19	HF	rs16929627	9	12820965	T	C	0.0039	0.0135	0.7745		CHD	rs5023607	2	35425529	T	C	-0.013839	0.0094778	0.144248		STROKE	rs5023607	2	35425529	C	T	0.0154	0.0083	0.06422		T2D	rs5023607	2	35425529	C	T	0.0058
mvCKM	YES	rs59324732	2	35723951	AC083939.1	181	T	C	0.162028	0.0255337	0.00356802	8.28994e-13	HF	rs12864396	13	77021434	T	C	0.0052	0.0097	0.592		CHD	rs59324732	2	35723951	C	T	0.014091	0.0117025	0.228549		STROKE	rs59324732	2	35723951	T	C	-0.0009	0.0103	0.929		T2D	rs59324732	2	35723951	T	C	-0.0302
mvCKM	YES	rs4328614	2	35817188	AC083939.1	181	G	A	0.267396	0.0314799	0.00371392	2.32687e-17	HF	rs17395631	12	23888223	T	G	0.0049	0.013	0.7091		CHD	rs4328614	2	35817188	A	G	0.006491	0.0103023	0.528658		STROKE	rs4328614	2	35817188	G	A	0.0117	0.009	0.1922		T2D	rs4328614	2	35817188	G	A	0.0025
mvCKM	YES	rs10181215	2	36397384	AC009414.1	182	A	G	0.154076	0.0187928	0.00314452	2.28194e-09	HF	rs11223367	11	132989139	T	G	-0.0028	0.0084	0.7358		CHD	rs10181215	2	36397384	G	A	-0.016157	0.0125291	0.197205		STROKE	rs10181215	2	36397384	A	G	-0.0096	0.0112	0.3943		T2D	rs10181215	2	36397384	A	G	-0.0519
mvCKM	YES	rs2021870	2	36708041	CRIM1	183	G	A	0.252485	0.0346331	0.00335896	6.3066e-25	HF	rs970386	9	75226846	T	C	0.0087	0.0078	0.2641		CHD	rs2021870	2	36708041	A	G	0.00724	0.0103414	0.483865		STROKE	rs2021870	2	36708041	G	A	0.0173	0.0095	0.0673194		T2D	rs2021870	2	36708041	G	A	-0.0024
mvCKM	YES	rs62133078	2	37226299	HEATR5B	184	T	C	0.474155	0.0409519	0.00321287	3.27345e-37	HF	rs4705801	5	112515405	T	C	-0.0036	0.0084	0.6713		CHD	rs62133078	2	37226299	C	T	-0.016123	0.0092985	0.0829316		STROKE	rs62133078	2	37226299	T	C	-0.0008	0.0082	0.9231		T2D	rs62133078	2	37226299	T	C	-0.0092
mvCKM	YES	rs13029968	2	38935110	GALM	185	A	G	0.0685885	-0.00155993	0.000213339	2.63228e-13	HF	rs11259541	10	15240556	C	G	0.0032	0.0097	0.7434		CHD	rs13029968	2	38935110	G	A	-0.008251	0.0146908	0.57436		STROKE	rs13029968	2	38935110	A	G	-0.0077	0.0129	0.5525		T2D	rs13029968	2	38935110	A	G	-0.0763
mvCKM	YES	rs2373702	2	40084166	SLC8A1-AS1	186	G	A	0.402584	0.0558018	0.0037264	1.07386e-50	HF	rs16915963	10	63039856	A	G	0.0086	0.0095	0.3624		CHD	rs2373702	2	40084166	A	G	-0.015014	0.009581	0.1171		STROKE	rs2373702	2	40084166	G	A	0.0092	0.0084	0.2786		T2D	rs2373702	2	40084166	G	A	-0.0296
mvCKM	YES	rs10198047	2	42024835	LDHAP3	187	G	A	0.280318	0.0368239	0.0037813	2.0678e-22	HF	rs1638006	7	157485165	T	G	0.0097	0.0089	0.2758		CHD	rs10198047	2	42024835	A	G	-0.008492	0.0101556	0.403049		STROKE	rs10198047	2	42024835	G	A	0.015	0.0089	0.0911507		T2D	rs10198047	2	42024835	G	A	0.0014
mvCKM	YES	rs13400649	2	42051279	LDHAP3	187	A	G	0.124254	0.0393131	0.00540219	3.40664e-13	HF	rs12597686	16	52682324	A	G	-0.0084	0.0101	0.4054		CHD	rs13400649	2	42051279	G	A	-0.000716	0.0135828	0.95796		STROKE	rs13400649	2	42051279	A	G	0.0067	0.0134	0.6205		T2D	rs13400649	2	42051279	A	G	0.0155
mvCKM	YES	rs735868	2	42272389	PKDCC	187	C	G	0.100398	0.0391522	0.00274162	2.8886e-46	HF	rs7920520	10	93969270	C	G	-0.0161	0.0097	0.09771		CHD	rs735868	2	42272389	G	C	0.005126	0.0129321	0.691828		STROKE	rs735868	2	42272389	C	G	-0.0053	0.0109	0.6264		T2D	rs735868	2	42272389	C	G	-0.0364
mvCKM	YES	rs2166499	2	43169289	AC016735.1	188	G	A	0.414513	0.0619819	0.00439052	2.97551e-45	HF	rs12420598	11	99755777	T	G	-0.0101	0.0085	0.2298		CHD	rs2166499	2	43169289	A	G	0.009156	0.0094115	0.330628		STROKE	rs2166499	2	43169289	G	A	-0.0056	0.0086	0.515901		T2D	rs2166499	2	43169289	G	A	0.0146
mvCKM	YES	rs6737964	2	44226195	LRPPRC	189	G	A	0.33499	-0.057022	0.00357024	2.01901e-57	HF	rs10041378	5	4094165	T	G	-0.0061	0.0092	0.5055		CHD	rs6737964	2	44226195	A	G	-0.012292	0.0097787	0.208746		STROKE	rs6737964	2	44226195	G	A	0.0161	0.0089	0.07001		T2D	rs6737964	2	44226195	G	A	-0.0016
mvCKM	YES	rs7602661	2	45506205	LINC01121	190	C	T	0.356859	0.0768025	0.00457947	3.97388e-63	HF	rs11874303	18	10414037	A	G	-0.0027	0.0109	0.8024		CHD	rs7602661	2	45506205	T	C	0.015595	0.0096309	0.105391		STROKE	rs7602661	2	45506205	C	T	-0.0021	0.0082	0.8009		T2D	rs7602661	2	45506205	C	T	-0.0313
mvCKM	YES	rs35128922	2	46033907	PRKCE	191	A	G	0.266402	0.063307	0.00420112	2.58732e-51	HF	rs9567015	13	43243088	T	C	-0.01	0.0134	0.4535		CHD	rs35128922	2	46033907	G	A	-0.014687	0.0106347	0.167263		STROKE	rs35128922	2	46033907	A	G	0.0092	0.0089	0.2988		T2D	rs35128922	2	46033907	A	G	0.0211
mvCKM	YES	rs10172245	2	47245581	TTC7A	192	G	A	0.452286	0.0157127	0.00284248	3.2427e-08	HF	rs7234819	18	26674692	A	G	0.0192	0.0094	0.04036		CHD	rs10172245	2	47245581	A	G	-0.009302	0.009355	0.320061		STROKE	rs10172245	2	47245581	G	A	0.0018	0.0079	0.8144		T2D	rs10172245	2	47245581	G	A	0.0043
mvCKM	YES	rs56825645	2	47787079	MSH2:KCNK12	193	G	C	0.27336	-0.0239214	0.00345972	4.70305e-12	HF	rs3786674	19	50505402	A	G	0.0087	0.0115	0.4484		CHD	rs56825645	2	47787079	C	G	0.002079	0.010375	0.84118		STROKE	rs56825645	2	47787079	G	C	-0.0014	0.009	0.8767		T2D	rs56825645	2	47787079	G	C	0.0416
mvCKM	YES	rs12713037	2	49366956	FSHR	194	T	C	0.311133	-0.0201931	0.00366858	3.70571e-08	HF	rs2824250	21	18542872	T	G	-0.0008	0.0089	0.9311		CHD	rs12713037	2	49366956	C	T	-0.002546	0.0098775	0.796595		STROKE	rs12713037	2	49366956	T	C	-0.0202	0.0084	0.0168101		T2D	rs12713037	2	49366956	T	C	-0.003
mvCKM	YES	rs10207605	2	52286399	AC007682.1	195	T	C	0.333002	-0.00322818	0.00023989	2.80267e-41	HF	rs6861121	5	40668727	A	G	-0.0109	0.0123	0.3742		CHD	rs10207605	2	52286399	C	T	-0.010713	0.0098688	0.277683		STROKE	rs10207605	2	52286399	T	C	-0.0046	0.0081	0.5653		T2D	rs10207605	2	52286399	T	C	0.0228
mvCKM	YES	rs1168239	2	52957508	AC010967.2	196	C	T	0.185885	0.0585117	0.00431746	7.67339e-42	HF	rs11630126	15	101722502	A	C	0.0001	0.0111	0.9955		CHD	rs1168239	2	52957508	T	C	0.014373	0.0125356	0.251559		STROKE	rs1168239	2	52957508	C	T	-0.0135	0.0108	0.2139		T2D	rs1168239	2	52957508	C	T	-0.0112
mvCKM	YES	rs1424987	2	53426610	SCARNA16	197	C	G	0.235586	0.0529836	0.00451226	7.75025e-32	HF	rs12546618	8	87204271	A	G	0.0021	0.0087	0.8065		CHD	rs1424987	2	53426610	G	C	-0.013186	0.0108128	0.222662		STROKE	rs1424987	2	53426610	C	G	0.0116	0.009	0.1982		T2D	rs1424987	2	53426610	C	G	-0.0267
mvCKM	YES	rs62138589	2	53532141	SCARNA16	197	T	C	0.191849	0.0615832	0.00500258	7.97349e-35	HF	rs4935101	10	55859477	T	C	0.0093	0.0082	0.2587		CHD	rs62138589	2	53532141	C	T	0.013891	0.011369	0.221771		STROKE	rs62138589	2	53532141	T	C	-0.016	0.0096	0.0943409		T2D	rs62138589	2	53532141	T	C	0.0154
mvCKM	YES	rs11891739	2	55662803	BTF3P5	198	C	G	0.22167	-0.0276853	0.00280354	5.33646e-23	HF	rs661311	5	88034867	T	C	-0.0089	0.0094	0.3414		CHD	rs11891739	2	55662803	G	C	0.0009	0.0109508	0.934499		STROKE	rs11891739	2	55662803	C	G	0.0086	0.0087	0.3223		T2D	rs11891739	2	55662803	C	G	0.0176
mvCKM	YES	rs1946545	2	56036435	EFEMP1	199	G	A	0.207753	-0.0040673	0.000573588	1.33162e-12	HF	rs7088794	10	67769615	A	T	-0.0083	0.0101	0.4118		CHD	rs1946545	2	56036435	A	G	-0.000437	0.0112647	0.969055		STROKE	rs1946545	2	56036435	G	A	0.0022	0.0095	0.8128		T2D	rs1946545	2	56036435	G	A	-0.0109
mvCKM	YES	rs7559099	2	61631390	USP34	200	G	A	0.153082	0.0212795	0.00343451	5.80008e-10	HF	rs4236818	8	94928208	A	C	0.0042	0.008	0.5957		CHD	rs7559099	2	61631390	A	G	0.010239	0.012893	0.427108		STROKE	rs7559099	2	61631390	G	A	0.0344	0.0109	0.00159401		T2D	rs7559099	2	61631390	G	A	-0.0014
mvCKM	YES	rs6545893	2	61875233	RNU6-1145P	200	A	C	0.227634	0.0406503	0.00462239	1.44043e-18	HF	rs1532687	5	73013115	T	C	-0.0243	0.0095	0.01051		CHD	rs6545893	2	61875233	C	A	0.001167	0.0120848	0.92307		STROKE	rs6545893	2	61875233	A	C	0.0048	0.0098	0.6277		T2D	rs6545893	2	61875233	A	C	-0.0132
mvCKM	YES	rs262528	2	63903367	WDPCP	201	T	C	0.279324	0.166029	0.00484461	1e-200	HF	rs1468150	7	114882351	T	C	-0.0059	0.0089	0.5083		CHD	rs262528	2	63903367	C	T	-0.00708	0.0114114	0.534972		STROKE	rs262528	2	63903367	T	C	-0.0119	0.0099	0.2276		T2D	rs262528	2	63903367	T	C	-0.0301
mvCKM	YES	rs6723426	2	64983495	SERTAD2	202	C	T	0.266402	0.0427818	0.00345482	3.22081e-35	HF	rs17150451	7	24929889	T	C	-0.0007	0.013	0.9557		CHD	rs6723426	2	64983495	T	C	0.001826	0.0111887	0.87036		STROKE	rs6723426	2	64983495	C	T	-0.0079	0.0094	0.405		T2D	rs6723426	2	64983495	C	T	0.0142
mvCKM	YES	rs7596231	2	66040362	AC074391.1	203	T	C	0.186879	-0.185431	0.00468315	1e-200	HF	rs4357381	9	30248450	C	G	0.0073	0.0111	0.5143		CHD	rs7596231	2	66040362	C	T	-0.008256	0.0111061	0.457255		STROKE	rs7596231	2	66040362	T	C	0.0077	0.0092	0.4027		T2D	rs7596231	2	66040362	T	C	-0.0013
mvCKM	YES	rs7603889	2	67288938	AC007403.3	204	A	T	0.0974155	0.0598707	0.00918702	7.17884e-11	HF	rs4931163	12	29347848	T	C	-0.0101	0.0108	0.3493		CHD	rs7603889	2	67288938	T	A	-0.016394	0.0182962	0.370235		STROKE	rs7603889	2	67288938	A	T	0.0041	0.0161	0.7976		T2D	rs7603889	2	67288938	A	T	-0.0504
mvCKM	YES	rs1503244	2	68224343	AC079112.1	205	C	T	0.150099	0.0351062	0.00584969	1.95645e-09	HF	rs1241347	18	33182828	A	G	0.0053	0.0078	0.5006		CHD	rs1503244	2	68224343	T	C	-0.002929	0.0141977	0.836555		STROKE	rs1503244	2	68224343	C	T	0.0048	0.0122	0.6921		T2D	rs1503244	2	68224343	C	T	0.023
mvCKM	YES	rs6546364	2	68475068	RP11-474G23.1:PPP3R1	205	A	C	0.363817	0.0501591	0.00337795	7.067e-50	HF	rs17796504	7	43314522	A	G	-0.0115	0.0153	0.4516		CHD	rs6546364	2	68475068	C	A	-0.011287	0.0102653	0.271538		STROKE	rs6546364	2	68475068	A	C	-0.0048	0.0086	0.5716		T2D	rs6546364	2	68475068	A	C	-0.0272
mvCKM	YES	rs6717242	2	68541991	CNRIP1	205	T	A	0.309145	0.0467425	0.00506309	2.65599e-20	HF	rs733961	8	137059754	A	G	0.0022	0.0078	0.7801		CHD	rs6717242	2	68541991	A	T	-0.001315	0.010538	0.900692		STROKE	rs6717242	2	68541991	T	A	-0.0058	0.0085	0.4964		T2D	rs6717242	2	68541991	T	A	-0.0031
mvCKM	YES	rs7563924	2	68589234	AC015969.3	205	C	T	0.0974155	-0.0748002	0.00615029	4.95034e-34	HF	rs10786370	10	99499822	A	G	0.0065	0.0091	0.4772		CHD	rs7563924	2	68589234	T	C	-0.006332	0.0153697	0.680356		STROKE	rs7563924	2	68589234	C	T	0.0087	0.0127	0.495		T2D	rs7563924	2	68589234	C	T	0.0311
mvCKM	YES	rs6749533	2	70691766	TGFA	206	C	T	0.110338	0.0384992	0.00633522	1.22436e-09	HF	rs2631493	11	24853023	A	G	0.0143	0.0116	0.2194		CHD	rs6749533	2	70691766	T	C	-0.01389	0.0151481	0.359172		STROKE	rs6749533	2	70691766	C	T	-0.0222	0.0124	0.0733095		T2D	rs6749533	2	70691766	C	T	0.0308
mvCKM	YES	rs7605323	2	70783827	TGFA	206	C	T	0.293241	0.0531658	0.00417455	3.7437e-37	HF	rs10846824	12	125573371	T	C	-0.0003	0.008	0.9688		CHD	rs7605323	2	70783827	T	C	-0.001075	0.0108704	0.921224		STROKE	rs7605323	2	70783827	C	T	-0.0072	0.0093	0.4353		T2D	rs7605323	2	70783827	C	T	-0.0013
mvCKM	YES	rs10210718	2	70966323	ADD2	206	T	C	0.358847	-0.0710741	0.00473791	7.21665e-51	HF	rs1191353	14	28577036	A	G	-0.0015	0.0094	0.8768		CHD	rs10210718	2	70966323	C	T	-0.018599	0.0099731	0.0621942		STROKE	rs10210718	2	70966323	T	C	-0.009	0.0088	0.3065		T2D	rs10210718	2	70966323	T	C	-0.0126
mvCKM	YES	rs6729375	2	71617644	ZNF638	207	A	G	0.126243	0.0340703	0.00465375	2.4606e-13	HF	rs1906432	15	53877705	C	G	-0.0025	0.0103	0.8095		CHD	rs6729375	2	71617644	G	A	-0.003815	0.0155012	0.805597		STROKE	rs6729375	2	71617644	A	G	-0.024	0.0133	0.0709905		T2D	rs6729375	2	71617644	A	G	-0.0155
mvCKM	YES	rs688433	2	72690622	EXOC6B	208	G	A	0.0984095	0.165038	0.00959929	3.01141e-66	HF	rs13171482	5	112701966	A	G	-0.0022	0.0089	0.8029		CHD	rs688433	2	72690622	A	G	-0.051367	0.0162333	0.0015546		STROKE	rs688433	2	72690622	G	A	0.0202	0.013	0.1186		T2D	rs688433	2	72690622	G	A	0.0335
mvCKM	YES	rs7574795	2	76200225	SUCLA2P2	209	C	G	0.171968	0.162703	0.00553124	3.50281e-190	HF	rs9506741	13	22415612	T	C	0.0034	0.0102	0.7353		CHD	rs7574795	2	76200225	G	C	-0.003314	0.0129571	0.798131		STROKE	rs7574795	2	76200225	C	G	0.0058	0.011	0.6003		T2D	rs7574795	2	76200225	C	G	0.0135
mvCKM	YES	rs4555369	2	77849209	LRRTM4	210	C	T	0.210736	-0.0291849	0.00409377	1.01024e-12	HF	rs1719247	15	45620985	T	C	-0.0113	0.009	0.208		CHD	rs4555369	2	77849209	T	C	-0.010515	0.0118078	0.373193		STROKE	rs4555369	2	77849209	C	T	0.0009	0.0103	0.9295		T2D	rs4555369	2	77849209	C	T	-0.0068
mvCKM	YES	rs11692744	2	77868088	AC084149.2	210	A	C	0.168986	-0.0421431	0.00599307	2.03642e-12	HF	rs11080171	17	30158073	A	G	0.0174	0.0091	0.05648		CHD	rs11692744	2	77868088	C	A	-0.003359	0.0138305	0.808107		STROKE	rs11692744	2	77868088	A	C	-0.0077	0.0117	0.5133		T2D	rs11692744	2	77868088	A	C	-0.0207
mvCKM	YES	rs12612949	2	78623415	CYCSP6	211	C	T	0.32505	0.0543832	0.00368095	2.14786e-49	HF	rs13182395	5	76607335	A	C	0.0094	0.0089	0.2915		CHD	rs12612949	2	78623415	T	C	0.005739	0.0101176	0.570558		STROKE	rs12612949	2	78623415	C	T	-0.0025	0.0085	0.7678		T2D	rs12612949	2	78623415	C	T	0.012
mvCKM	YES	rs12623907	2	79672431	CTNNA2	212	C	T	0.304175	-0.0235961	0.00323903	3.218e-13	HF	rs2441901	8	105207142	A	T	-0.005	0.0086	0.5562		CHD	rs12623907	2	79672431	T	C	-0.006311	0.0100448	0.529817		STROKE	rs12623907	2	79672431	C	T	-0.0131	0.0084	0.1216		T2D	rs12623907	2	79672431	C	T	-0.0289
mvCKM	YES	rs12993353	2	79941636	CTNNA2	212	G	A	0.213718	0.12237	0.00508303	4.6612e-128	HF	rs6480723	10	75966366	A	G	-0.0123	0.0117	0.2914		CHD	rs12993353	2	79941636	A	G	-0.02261	0.0120979	0.0616339		STROKE	rs12993353	2	79941636	G	A	-0.0011	0.0105	0.9143		T2D	rs12993353	2	79941636	G	A	-0.0112
mvCKM	YES	rs3100108	2	84029777	SNORD112	213	A	T	0.312127	-0.0317839	0.00225351	3.57907e-45	HF	rs11003411	10	54902351	A	G	-0.0047	0.0081	0.56		CHD	rs3100108	2	84029777	T	A	-0.010879	0.0099416	0.273828		STROKE	rs3100108	2	84029777	A	T	-0.0033	0.0082	0.6909		T2D	rs3100108	2	84029777	A	T	-0.0063
mvCKM	YES	rs1563895	2	84817714	DNAH6	214	T	C	0.075547	0.166922	0.0128918	2.41385e-38	HF	rs2874374	11	125073691	A	G	0.0225	0.0099	0.02301		CHD	rs1563895	2	84817714	C	T	0.016241	0.017966	0.366002		STROKE	rs1563895	2	84817714	T	C	0.0031	0.0153	0.8387		T2D	rs1563895	2	84817714	T	C	0.0188
mvCKM	YES	rs55746113	2	86032424	AC105053.3	215	G	A	0.148111	0.225259	0.00555894	1e-200	HF	rs1821301	19	15879895	A	G	-0.0124	0.0101	0.2221		CHD	rs55746113	2	86032424	A	G	0.007455	0.0133395	0.576253		STROKE	rs55746113	2	86032424	G	A	0.0108	0.0109	0.3249		T2D	rs55746113	2	86032424	G	A	0.0152
mvCKM	YES	rs6722086	2	87111715	ANAPC1P1	216	C	T	0.164016	0.017356	0.00315957	3.94839e-08	HF	rs4313236	9	22610531	A	G	-0.0054	0.0096	0.5732		CHD	rs6722086	2	87111715	T	C	-0.007255	0.0134112	0.588531		STROKE	rs6722086	2	87111715	C	T	0.0034	0.0116	0.769699		T2D	rs6722086	2	87111715	C	T	-0.0158
mvCKM	YES	rs35738525	2	97147587	NEURL3	217	T	C	0.156064	-0.0898683	0.00580852	5.37869e-54	HF	rs732796	18	55791637	T	C	0.0089	0.0082	0.279		CHD	rs35738525	2	97147587	C	T	0.002385	0.0160508	0.881877		STROKE	rs35738525	2	97147587	T	C	0.0042	0.013	0.746401		T2D	rs35738525	2	97147587	T	C	-0.036
mvCKM	YES	rs6721361	2	102159888	AC092570.4	218	G	A	0.4334	-0.0750529	0.00354762	2.43771e-99	HF	rs4281685	15	97933579	A	G	0.0006	0.0083	0.9403		CHD	rs6721361	2	102159888	A	G	0.004703	0.0100166	0.638697		STROKE	rs6721361	2	102159888	G	A	-0.0136	0.0082	0.0969706		T2D	rs6721361	2	102159888	G	A	-0.0154
mvCKM	YES	rs72995626	2	103162580	SLC9A4	219	C	T	0.125249	-0.216989	0.00645335	1e-200	HF	rs16924776	9	845564	T	C	0.0136	0.0118	0.2509		CHD	rs72995626	2	103162580	T	C	0.001851	0.0148777	0.900987		STROKE	rs72995626	2	103162580	C	T	-0.0145	0.0122	0.2343		T2D	rs72995626	2	103162580	C	T	-0.0213
mvCKM	YES	rs73946422	2	104991726	AHCYP3	220	A	C	0.199801	-0.0853084	0.00450123	4.23276e-80	HF	rs734002	7	148505788	T	C	-0.018	0.0081	0.02555		CHD	rs73946422	2	104991726	C	A	0.010283	0.0116503	0.377433		STROKE	rs73946422	2	104991726	A	C	0.0102	0.0094	0.2756		T2D	rs73946422	2	104991726	A	C	0.0056
mvCKM	YES	rs7589732	2	105809102	AC104655.3	221	C	T	0.27336	-0.0715207	0.00439989	2.05443e-59	HF	rs11612273	12	65707858	A	C	-0.0038	0.0085	0.6524		CHD	rs7589732	2	105809102	T	C	0.002231	0.0105814	0.833011		STROKE	rs7589732	2	105809102	C	T	0.0093	0.0089	0.2952		T2D	rs7589732	2	105809102	C	T	0.0086
mvCKM	YES	rs80086271	2	106667037	C2orf40	222	A	G	0.132207	-0.0549127	0.00486446	1.49488e-29	HF	rs6872292	5	146711782	A	T	0.0128	0.0115	0.2678		CHD	rs80086271	2	106667037	G	A	-0.012755	0.0144247	0.376562		STROKE	rs80086271	2	106667037	A	G	0.0047	0.0119	0.6945		T2D	rs80086271	2	106667037	A	G	0.0115
mvCKM	YES	rs1424773	2	108017810	AC096669.1:AC096669.2	223	A	T	0.28827	-0.0278912	0.00388728	7.23147e-13	HF	rs12482068	21	32270407	A	G	0.0389	0.0146	0.007856		CHD	rs1424773	2	108017810	T	A	0.008863	0.0105803	0.402207		STROKE	rs1424773	2	108017810	A	T	-0.0045	0.0094	0.6339		T2D	rs1424773	2	108017810	A	T	0.0201
mvCKM	YES	rs2271701	2	112731173	MERTK	224	G	C	0.286282	-0.0163865	0.00258892	2.45981e-10	HF	rs13280150	8	59198884	A	G	-0.005	0.0112	0.6548		CHD	rs2271701	2	112731173	C	G	0.024439	0.0107639	0.0231804		STROKE	rs2271701	2	112731173	G	C	-0.0043	0.0089	0.631499		T2D	rs2271701	2	112731173	G	C	-0.0056
mvCKM	YES	rs1402449	2	116146175	DPP10	225	G	A	0.168986	0.153417	0.00443655	1e-200	HF	rs6595812	5	127575603	A	G	0.0309	0.0114	0.006553		CHD	rs1402449	2	116146175	A	G	0.003894	0.0117915	0.741221		STROKE	rs1402449	2	116146175	G	A	0.0057	0.0096	0.553701		T2D	rs1402449	2	116146175	G	A	-0.0359
mvCKM	YES	rs60488711	2	116854998	DPP10	226	A	C	0.176938	-0.0225311	0.00381355	3.45931e-09	HF	rs6470066	8	123182956	A	G	-0.0187	0.0085	0.02702		CHD	rs60488711	2	116854998	C	A	-0.007584	0.0121185	0.531434		STROKE	rs60488711	2	116854998	A	C	-0.0057	0.0098	0.5585		T2D	rs60488711	2	116854998	A	C	-0.0003
mvCKM	YES	rs1974913	2	118501813	AC009312.1	227	C	A	0.204771	0.0263746	0.00424729	5.30717e-10	HF	rs12220782	10	131485205	A	G	0.0057	0.0086	0.5067		CHD	rs1974913	2	118501813	A	C	0.00476	0.0120696	0.693301		STROKE	rs1974913	2	118501813	C	A	0.0107	0.0104	0.3029		T2D	rs1974913	2	118501813	C	A	0.0026
mvCKM	YES	rs204863	2	118561727	AC009312.1	227	G	A	0.100398	0.0971491	0.00605611	6.55607e-58	HF	rs10746715	9	86205804	T	C	0.0127	0.0096	0.1888		CHD	rs204863	2	118561727	A	G	-0.00609	0.0146039	0.67667		STROKE	rs204863	2	118561727	G	A	0.0149	0.0123	0.2252		T2D	rs204863	2	118561727	G	A	-0.0068
mvCKM	YES	rs1992131	2	121125289	INHBB	228	T	C	0.127237	-0.090973	0.00591678	2.39309e-53	HF	rs11193816	10	109721673	A	G	-0.0039	0.0101	0.7007		CHD	rs1992131	2	121125289	C	T	-0.004888	0.0135252	0.717803		STROKE	rs1992131	2	121125289	T	C	-0.0016	0.0111	0.8827		T2D	rs1992131	2	121125289	T	C	0.0384
mvCKM	YES	rs6716061	2	123171791	AC018737.3	229	G	A	0.125249	0.0525844	0.00590838	5.58676e-19	HF	rs1107212	15	101566456	T	C	0.0018	0.0092	0.8446		CHD	rs6716061	2	123171791	A	G	-0.020192	0.0154197	0.190368		STROKE	rs6716061	2	123171791	G	A	-0.0097	0.0127	0.4435		T2D	rs6716061	2	123171791	G	A	0.0169
mvCKM	YES	rs113665621	2	123749438	AC062020.2	230	T	C	0.210736	0.0274207	0.00400136	7.24009e-12	HF	rs7125940	11	80932427	T	G	0.0119	0.0083	0.1488		CHD	rs113665621	2	123749438	C	T	0.002023	0.0118904	0.864902		STROKE	rs113665621	2	123749438	T	C	-0.0126	0.01	0.2062		T2D	rs113665621	2	123749438	T	C	-0.006
mvCKM	YES	rs4972255	2	126862762	AC114813.1	231	G	A	0.264414	-0.0184966	0.00255449	4.45952e-13	HF	rs1007062	14	63498060	A	T	-0.0081	0.01	0.4176		CHD	rs4972255	2	126862762	A	G	0.011818	0.0114309	0.3012		STROKE	rs4972255	2	126862762	G	A	-0.0173	0.0094	0.0655194		T2D	rs4972255	2	126862762	G	A	-0.0024
mvCKM	YES	rs57109420	2	127891356	BIN1	232	A	G	0.193837	-0.0379565	0.00420047	1.62147e-19	HF	rs8122090	20	7573831	C	G	0.0039	0.0113	0.7331		CHD	rs57109420	2	127891356	G	A	0.025766	0.0131049	0.0492822		STROKE	rs57109420	2	127891356	A	G	0.0017	0.0108	0.8785		T2D	rs57109420	2	127891356	A	G	-0.0039
mvCKM	YES	rs80147256	2	128986764	HS6ST1	233	T	C	0.204771	0.00113218	0.000104291	1.86862e-27	HF	rs7840407	8	13515935	C	G	-0.004	0.0114	0.7242		CHD	rs80147256	2	128986764	C	T	-0.018786	0.0112528	0.0950277		STROKE	rs80147256	2	128986764	T	C	0.0058	0.0095	0.5407		T2D	rs80147256	2	128986764	T	C	-0.005
mvCKM	YES	rs7562504	2	130462267	AC079776.1	234	C	G	0.462227	0.0995524	0.00438828	6.16362e-114	HF	rs2094667	13	20909520	A	G	0.0047	0.0127	0.7093		CHD	rs7562504	2	130462267	G	C	0.001446	0.0101371	0.886572		STROKE	rs7562504	2	130462267	C	G	0.0015	0.0081	0.848		T2D	rs7562504	2	130462267	C	G	-0.0161
mvCKM	YES	rs13015134	2	130599922	AC079776.1	234	T	C	0.253479	-0.0192734	0.00214778	2.86816e-19	HF	rs10890702	11	107180885	T	C	0.0149	0.0084	0.07467		CHD	rs13015134	2	130599922	C	T	-0.010179	0.0105966	0.33676		STROKE	rs13015134	2	130599922	T	C	0.0125	0.0091	0.1711		T2D	rs13015134	2	130599922	T	C	-0.0092
mvCKM	YES	rs4850205	2	132207502	AC073869.20	235	G	A	0.232604	-0.0405392	0.00540974	6.69386e-14	HF	rs1330848	9	112322087	C	G	-0.0008	0.008	0.9249		CHD	rs4850205	2	132207502	A	G	0.00109	0.0132211	0.934294		STROKE	rs4850205	2	132207502	G	A	0.0181	0.0111	0.1038		T2D	rs4850205	2	132207502	G	A	-0.0098
mvCKM	YES	rs62166635	2	134854023	MGAT5	236	G	T	0.0805169	-0.109432	0.00923615	2.1985e-32	HF	rs1693951	16	86266440	A	G	-0.009	0.0079	0.2536		CHD	rs62166635	2	134854023	T	G	-0.006785	0.016204	0.675419		STROKE	rs62166635	2	134854023	G	T	0.0189	0.0134	0.1598		T2D	rs62166635	2	134854023	G	T	0.0155
mvCKM	YES	rs62167966	2	135045432	MGAT5	236	C	A	0.189861	-0.0318385	0.00485064	5.24652e-11	HF	rs10507546	13	47483074	A	G	0.0123	0.0091	0.1739		CHD	rs62167966	2	135045432	A	C	-0.016018	0.01327	0.227399		STROKE	rs62167966	2	135045432	C	A	-0.0232	0.0111	0.0371398		T2D	rs62167966	2	135045432	C	A	0.0064
mvCKM	YES	rs10189863	2	136849515	AC068492.1	237	G	A	0.253479	0.0204641	0.00343456	2.54892e-09	HF	rs2184383	10	16376270	A	C	-0.0044	0.0102	0.6622		CHD	rs10189863	2	136849515	A	G	-0.017077	0.0107998	0.113824		STROKE	rs10189863	2	136849515	G	A	-0.0057	0.009	0.5264		T2D	rs10189863	2	136849515	G	A	-0.007
mvCKM	YES	rs4954359	2	137475955	THSD7B	238	A	G	0.0934394	-0.0758268	0.00652314	3.10162e-31	HF	rs1592818	5	168741524	A	C	-0.0167	0.0092	0.07077		CHD	rs4954359	2	137475955	G	A	-0.008569	0.0159466	0.591021		STROKE	rs4954359	2	137475955	A	G	0.0094	0.0135	0.4856		T2D	rs4954359	2	137475955	A	G	-0.0127
mvCKM	YES	rs11885193	2	139080891	AC097523.3	239	G	A	0.217694	-0.0478585	0.00291999	2.25661e-60	HF	rs1111578	12	117913256	T	G	0.0145	0.0108	0.1774		CHD	rs11885193	2	139080891	A	G	0.01572	0.0116655	0.177801		STROKE	rs11885193	2	139080891	G	A	0.0124	0.0096	0.1969		T2D	rs11885193	2	139080891	G	A	-0.0178
mvCKM	YES	rs1085461	2	145581451	TEX41	240	G	A	0.299205	-0.0482454	0.00494254	1.65095e-22	HF	rs6065093	20	59918671	A	G	0.0012	0.0102	0.9063		CHD	rs1085461	2	145581451	A	G	0.001991	0.010526	0.849975		STROKE	rs1085461	2	145581451	G	A	0.01	0.0088	0.2548		T2D	rs1085461	2	145581451	G	A	-0.0062
mvCKM	YES	rs13010506	2	147728038	AC062032.1	241	A	G	0.265408	-0.00172731	0.000144908	9.31251e-33	HF	rs11652074	17	78773977	A	G	0.0244	0.0117	0.03755		CHD	rs13010506	2	147728038	G	A	-0.002811	0.0131277	0.830447		STROKE	rs13010506	2	147728038	A	G	0.0113	0.0108	0.2971		T2D	rs13010506	2	147728038	A	G	0.0038
mvCKM	YES	rs7580064	2	148243073	RNU6-715P	242	C	T	0.383698	0.0013273	0.000228639	6.42904e-09	HF	rs2840500	8	5826095	A	G	0.0192	0.009	0.03252		CHD	rs7580064	2	148243073	T	C	0.004202	0.0098439	0.669478		STROKE	rs7580064	2	148243073	C	T	-0.0118	0.0083	0.1553		T2D	rs7580064	2	148243073	C	T	-0.0093
mvCKM	YES	rs13016400	2	148563890	AC009480.4	242	C	T	0.45825	0.0821101	0.00377993	1.2534e-104	HF	rs2295818	14	55215297	C	G	0.0115	0.0095	0.2244		CHD	rs13016400	2	148563890	T	C	0.018472	0.009506	0.0519936		STROKE	rs13016400	2	148563890	C	T	0.0035	0.0079	0.6575		T2D	rs13016400	2	148563890	C	T	-0.0089
mvCKM	YES	rs179322	2	150010847	LYPD6B	243	T	G	0.170974	-0.091428	0.00604789	1.24457e-51	HF	rs11063613	12	5419035	A	C	-0.0097	0.0088	0.2702		CHD	rs179322	2	150010847	G	T	-0.000595	0.0121087	0.960809		STROKE	rs179322	2	150010847	T	G	0.0092	0.0099	0.3558		T2D	rs179322	2	150010847	T	G	-0.0142
mvCKM	YES	rs1618828	2	150613638	AC144449.1	244	G	A	0.318091	-0.0246872	0.00367708	1.89627e-11	HF	rs7233175	18	12660285	T	G	-0.0148	0.0083	0.07548		CHD	rs1618828	2	150613638	A	G	-0.001867	0.0102805	0.855892		STROKE	rs1618828	2	150613638	G	A	-0.006	0.0088	0.4961		T2D	rs1618828	2	150613638	G	A	0.0119
mvCKM	YES	rs6759742	2	154041418	AC011901.2	245	A	G	0.175944	-1.18961	0.00751436	1e-200	HF	rs9536936	13	33842309	A	G	0.0047	0.0088	0.5945		CHD	rs6759742	2	154041418	G	A	-0.003934	0.013522	0.771102		STROKE	rs6759742	2	154041418	A	G	0.0005	0.0116	0.969		T2D	rs6759742	2	154041418	A	G	-0.0041
mvCKM	YES	rs74687290	2	154119028	AC079150.2	245	G	A	0.170974	2.6203	0.0210596	1e-200	HF	rs12554240	9	89885028	T	C	0.012	0.0094	0.202		CHD	rs74687290	2	154119028	A	G	0.021716	0.0128702	0.091544		STROKE	rs74687290	2	154119028	G	A	-0.0085	0.011	0.4394		T2D	rs74687290	2	154119028	G	A	-0.0068
mvCKM	YES	rs7576884	2	154885056	GALNT13	246	T	C	0.492048	0.029929	0.00388555	1.33288e-14	HF	rs10224039	7	24367761	T	C	0.0136	0.0085	0.1083		CHD	rs7576884	2	154885056	C	T	-0.007652	0.0099275	0.440832		STROKE	rs7576884	2	154885056	T	C	0.0194	0.0087	0.0265901		T2D	rs7576884	2	154885056	T	C	-0.0173
[truncated: 1,724 more rows]
[truncated: 20 more columns]

## Sheet: Supplementatry Table 7
Supplementary Table 7. GWAS Catalog look-up of the multivariate CKM (mvCKM) GWAS novel lead SNPs and independent significant SNPs (performed February 8, 2025)
[truncated: 1,212 more rows]

## Sheet: Supplementatry Table 8
Supplementary Table 8. SuSiE and FINEMAP fine-mapping of multivariate CKM (mvCKM) lead SNPs
[truncated: 101 more rows]

## Sheet: Supplementatry Table 9
Supplementary Table 9. Transcriptome-wide association study (TWAS)
[truncated: 31,143 more rows]

[truncated: 10 more sheets: Supplementatry Table 10, Supplementatry Table 11, Supplementatry Table 12, Supplementatry Table 13, Supplementatry Table 14, Supplementatry Table 15, Supplementatry Table 16, Supplementatry Table 17, Supplementatry Table 18, Supplementatry Table 19]
